# Supplementary material
Source: publisher figshare collection journal article supplement (https://acs.figshare.com/ndownloader/files/9791356)
Supplement: Supplementary file 1 [file 9791356]

 
data_Compound24 
  
_audit_creation_method            'SHELXL-2014/7' 
_shelx_SHELXL_version_number      '2014/7' 
_chemical_name_systematic         Compound24 
_chemical_name_common             Compound24 
_chemical_melting_point           ? 
_chemical_formula_moiety          ? 
_chemical_formula_sum 
 'C66 H86 N4 Ni2 O2' 
_chemical_formula_weight          1084.80 
  
loop_ 
 _atom_type_symbol 
 _atom_type_description 
 _atom_type_scat_dispersion_real 
 _atom_type_scat_dispersion_imag 
 _atom_type_scat_source 
 'C'  'C'   0.0033   0.0016 
 'International Tables Vol C Tables 4.2.6.8 and 6.1.1.4' 
 'H'  'H'   0.0000   0.0000 
 'International Tables Vol C Tables 4.2.6.8 and 6.1.1.4' 
 'N'  'N'   0.0061   0.0033 
 'International Tables Vol C Tables 4.2.6.8 and 6.1.1.4' 
 'O'  'O'   0.0106   0.0060 
 'International Tables Vol C Tables 4.2.6.8 and 6.1.1.4' 
 'Ni'  'Ni'   0.3393   1.1124 
 'International Tables Vol C Tables 4.2.6.8 and 6.1.1.4' 
  
_space_group_crystal_system       monoclinic 
_space_group_IT_number            15 
_space_group_name_H-M_alt         'C 2/c' 
_space_group_name_Hall            '-C 2yc' 

_diffrn_refln_scan_width          1.0 
_diffrn_refln_scan_rate           10 
_space_group.centring_type        primitive 
  
_shelx_space_group_comment 
; 
The symmetry employed for this shelxl refinement is uniquely defined 
by the following loop, which should always be used as a source of 
symmetry information in preference to the above space-group names. 
They are only intended as comments. 
; 
  
loop_ 
 _space_group_symop_operation_xyz 
 'x, y, z' 
 '-x, y, -z+1/2' 
 'x+1/2, y+1/2, z' 
 '-x+1/2, y+1/2, -z+1/2' 
 '-x, -y, -z' 
 'x, -y, z-1/2' 
 '-x+1/2, -y+1/2, -z' 
 'x+1/2, -y+1/2, z-1/2' 
  
_cell_length_a                    22.8854(18) 
_cell_length_b                    10.4415(9) 
_cell_length_c                    25.777(2) 
_cell_angle_alpha                 90 
_cell_angle_beta                  108.919(4) 
_cell_angle_gamma                 90 
_cell_volume                      5826.8(9) 
_cell_formula_units_Z             4 
_cell_measurement_temperature     100(2) 
_cell_measurement_reflns_used     9799 
_cell_measurement_theta_min       2.43 
_cell_measurement_theta_max       25.34 
  
_exptl_crystal_description        plate 
_exptl_crystal_colour             yellow
_exptl_crystal_density_meas       ? 
_exptl_crystal_density_method     ? 
_exptl_crystal_density_diffrn     1.237 
_exptl_crystal_F_000              2328 
_exptl_transmission_factor_min    ? 
_exptl_transmission_factor_max    ? 
_exptl_crystal_size_max           0.060 
_exptl_crystal_size_mid           0.060 
_exptl_crystal_size_min           0.020 
_exptl_absorpt_coefficient_mu     0.693 
_shelx_estimated_absorpt_T_min    0.960 
_shelx_estimated_absorpt_T_max    0.986 
_exptl_absorpt_correction_type    multi-scan 
_exptl_absorpt_correction_T_min   0.837	 
_exptl_absorpt_correction_T_max   0.928 
_exptl_absorpt_process_details    SADABS 
_exptl_absorpt_special_details    ? 
_diffrn_ambient_temperature       100(2) 
_diffrn_radiation_wavelength      0.71073 
_diffrn_radiation_type            MoK\a 
_diffrn_source                    'microfocus sealed tube' 
_diffrn_measurement_device_type   'Bruker APEX-II CCD' 
_diffrn_measurement_method        '\f and \w scans' 
_diffrn_detector_area_resol_mean  8.366 
_diffrn_reflns_number             76389 
_diffrn_reflns_av_unetI/netI      0.0187 
_diffrn_reflns_av_R_equivalents   0.0351 
_diffrn_reflns_limit_h_min        -27 
_diffrn_reflns_limit_h_max        27 
_diffrn_reflns_limit_k_min        -12 
_diffrn_reflns_limit_k_max        12 
_diffrn_reflns_limit_l_min        -31 
_diffrn_reflns_limit_l_max        30 
_diffrn_reflns_theta_min          1.670 
_diffrn_reflns_theta_max          25.373 
_diffrn_reflns_theta_full         25.000 
_diffrn_measured_fraction_theta_max   1.000 
_diffrn_measured_fraction_theta_full  1.000 
_diffrn_reflns_Laue_measured_fraction_max    1.000 
_diffrn_reflns_Laue_measured_fraction_full   1.000 
_diffrn_reflns_point_group_measured_fraction_max   1.000 
_diffrn_reflns_point_group_measured_fraction_full  1.000 
_reflns_number_total              5360 
_reflns_number_gt                 4659 
_reflns_threshold_expression      'I > 2\s(I)' 
_reflns_Friedel_coverage          0.000 
_reflns_Friedel_fraction_max      . 
_reflns_Friedel_fraction_full     . 
  
_reflns_special_details 
; 
 Reflections were merged by SHELXL according to the crystal 
 class for the calculation of statistics and refinement. 
  
 _reflns_Friedel_fraction is defined as the number of unique 
 Friedel pairs measured divided by the number that would be 
 possible theoretically, ignoring centric projections and 
 systematic absences. 
; 
  
_computing_data_collection        'Bruker APEX2' 
_computing_cell_refinement        'Bruker SAINT' 
_computing_data_reduction         'Bruker SAINT' 
_computing_structure_solution     'SHELXT-2014' 
_computing_structure_refinement   'SHELXL-2014' 
_computing_molecular_graphics     'ORTEP-32' 
_computing_publication_material   'WinGX' 
_refine_special_details           ? 
_refine_ls_structure_factor_coef  Fsqd 
_refine_ls_matrix_type            full 
_refine_ls_weighting_scheme       calc 
_refine_ls_weighting_details 
'w=1/[\s^2^(Fo^2^)+(0.0367P)^2^+11.3868P] where P=(Fo^2^+2Fc^2^)/3' 
_atom_sites_solution_primary      iterative 
_atom_sites_solution_secondary    difmap 
_atom_sites_solution_hydrogens    geom 
_refine_ls_hydrogen_treatment     constr 
_refine_ls_extinction_method      none 
_refine_ls_extinction_coef        . 
_refine_ls_number_reflns          5360 
_refine_ls_number_parameters      342 
_refine_ls_number_restraints      0 
_refine_ls_R_factor_all           0.0432 
_refine_ls_R_factor_gt            0.0355 
_refine_ls_wR_factor_ref          0.0888 
_refine_ls_wR_factor_gt           0.0844 
_refine_ls_goodness_of_fit_ref    1.073 
_refine_ls_restrained_S_all       1.073 
_refine_ls_shift/su_max           0.001 
_refine_ls_shift/su_mean          0.000 
  
loop_ 
 _atom_site_label 
 _atom_site_type_symbol 
 _atom_site_fract_x 
 _atom_site_fract_y 
 _atom_site_fract_z 
 _atom_site_U_iso_or_equiv 
 _atom_site_adp_type 
 _atom_site_occupancy 
 _atom_site_site_symmetry_order 
 _atom_site_calc_flag 
 _atom_site_refinement_flags_posn 
 _atom_site_refinement_flags_adp 
 _atom_site_refinement_flags_occupancy 
 _atom_site_disorder_assembly 
 _atom_site_disorder_group 
C1 C 0.44355(9) 0.61671(18) 0.61549(8) 0.0183(4) Uani 1 1 d . . . . . 
C2 C 0.37758(9) 0.5844(2) 0.52423(8) 0.0211(4) Uani 1 1 d . . . . . 
H2A H 0.3651 0.6652 0.5035 0.025 Uiso 1 1 calc R U . . . 
H2B H 0.3474 0.5164 0.5071 0.025 Uiso 1 1 calc R U . . . 
C3 C 0.44266(8) 0.5458(2) 0.52815(8) 0.0205(4) Uani 1 1 d . . . . . 
H3A H 0.4468 0.4516 0.5269 0.025 Uiso 1 1 calc R U . . . 
H3B H 0.4553 0.5850 0.4984 0.025 Uiso 1 1 calc R U . . . 
C4 C 0.33058(8) 0.62640(19) 0.59845(7) 0.0186(4) Uani 1 1 d . . . . . 
C5 C 0.30750(9) 0.7514(2) 0.59338(8) 0.0202(4) Uani 1 1 d . . . . . 
C6 C 0.25157(9) 0.7708(2) 0.60334(8) 0.0251(5) Uani 1 1 d . . . . . 
H6 H 0.2344 0.8544 0.6001 0.030 Uiso 1 1 calc R U . . . 
C7 C 0.22096(9) 0.6699(2) 0.61788(9) 0.0279(5) Uani 1 1 d . . . . . 
H7 H 0.1826 0.6846 0.6236 0.034 Uiso 1 1 calc R U . . . 
C8 C 0.24567(9) 0.5482(2) 0.62412(9) 0.0269(5) Uani 1 1 d . . . . . 
H8 H 0.2245 0.4803 0.6349 0.032 Uiso 1 1 calc R U . . . 
C9 C 0.30133(9) 0.5235(2) 0.61477(8) 0.0219(4) Uani 1 1 d . . . . . 
C10 C 0.34120(9) 0.86335(19) 0.57863(8) 0.0219(4) Uani 1 1 d . . . . . 
H10 H 0.3749 0.8278 0.5660 0.026 Uiso 1 1 calc R U . . . 
C11 C 0.29890(10) 0.9434(2) 0.53183(9) 0.0302(5) Uani 1 1 d . . . . . 
H11A H 0.2792 0.8878 0.5004 0.045 Uiso 1 1 calc R U . . . 
H11B H 0.3233 1.0092 0.5211 0.045 Uiso 1 1 calc R U . . . 
H11C H 0.2671 0.9845 0.5440 0.045 Uiso 1 1 calc R U . . . 
C12 C 0.37143(10) 0.9464(2) 0.62916(9) 0.0321(5) Uani 1 1 d . . . . . 
H12A H 0.3395 0.9807 0.6431 0.048 Uiso 1 1 calc R U . . . 
H12B H 0.3937 1.0173 0.6191 0.048 Uiso 1 1 calc R U . . . 
H12C H 0.4005 0.8943 0.6577 0.048 Uiso 1 1 calc R U . . . 
C13 C 0.32790(10) 0.3891(2) 0.62133(9) 0.0292(5) Uani 1 1 d . . . . . 
H13 H 0.3731 0.3962 0.6269 0.035 Uiso 1 1 calc R U . . . 
C14 C 0.29856(13) 0.3088(2) 0.56969(10) 0.0401(6) Uani 1 1 d . . . . . 
H14A H 0.2540 0.3021 0.5628 0.060 Uiso 1 1 calc R U . . . 
H14B H 0.3169 0.2229 0.5750 0.060 Uiso 1 1 calc R U . . . 
H14C H 0.3061 0.3499 0.5383 0.060 Uiso 1 1 calc R U . . . 
C15 C 0.32031(12) 0.3201(2) 0.67113(10) 0.0408(6) Uani 1 1 d . . . . . 
H15A H 0.3356 0.3750 0.7036 0.061 Uiso 1 1 calc R U . . . 
H15B H 0.3440 0.2401 0.6774 0.061 Uiso 1 1 calc R U . . . 
H15C H 0.2765 0.3010 0.6643 0.061 Uiso 1 1 calc R U . . . 
C16 C 0.54458(8) 0.57937(19) 0.60210(8) 0.0194(4) Uani 1 1 d . . . . . 
C17 C 0.56900(9) 0.4683(2) 0.63164(8) 0.0231(4) Uani 1 1 d . . . . . 
C18 C 0.63329(10) 0.4554(2) 0.65080(9) 0.0293(5) Uani 1 1 d . . . . . 
H18 H 0.6514 0.3824 0.6719 0.035 Uiso 1 1 calc R U . . . 
C19 C 0.67094(10) 0.5474(2) 0.63949(9) 0.0328(5) Uani 1 1 d . . . . . 
H19 H 0.7145 0.5381 0.6537 0.039 Uiso 1 1 calc R U . . . 
C20 C 0.64555(9) 0.6525(2) 0.60772(9) 0.0287(5) Uani 1 1 d . . . . . 
H20 H 0.6719 0.7134 0.5992 0.034 Uiso 1 1 calc R U . . . 
C21 C 0.58179(9) 0.6705(2) 0.58805(8) 0.0228(4) Uani 1 1 d . . . . . 
C22 C 0.52854(10) 0.3623(2) 0.64154(9) 0.0260(5) Uani 1 1 d . . . . . 
H22 H 0.4847 0.3914 0.6262 0.031 Uiso 1 1 calc R U . . . 
C23 C 0.53473(11) 0.2396(2) 0.61177(9) 0.0320(5) Uani 1 1 d . . . . . 
H23A H 0.5259 0.2578 0.5727 0.048 Uiso 1 1 calc R U . . . 
H23B H 0.5054 0.1757 0.6163 0.048 Uiso 1 1 calc R U . . . 
H23C H 0.5769 0.2064 0.6272 0.048 Uiso 1 1 calc R U . . . 
C24 C 0.54182(15) 0.3358(2) 0.70231(10) 0.0472(7) Uani 1 1 d . . . . . 
H24A H 0.5840 0.3029 0.7181 0.071 Uiso 1 1 calc R U . . . 
H24B H 0.5124 0.2722 0.7070 0.071 Uiso 1 1 calc R U . . . 
H24C H 0.5376 0.4153 0.7210 0.071 Uiso 1 1 calc R U . . . 
C25 C 0.55326(10) 0.7860(2) 0.55287(9) 0.0268(5) Uani 1 1 d . . . . . 
H25 H 0.5135 0.7571 0.5255 0.032 Uiso 1 1 calc R U . . . 
C26 C 0.59362(11) 0.8400(3) 0.52073(10) 0.0396(6) Uani 1 1 d . . . . . 
H26A H 0.5706 0.9059 0.4952 0.059 Uiso 1 1 calc R U . . . 
H26B H 0.6049 0.7708 0.5001 0.059 Uiso 1 1 calc R U . . . 
H26C H 0.6311 0.8777 0.5463 0.059 Uiso 1 1 calc R U . . . 
C27 C 0.53766(14) 0.8926(2) 0.58692(11) 0.0442(6) Uani 1 1 d . . . . . 
H27A H 0.5107 0.8586 0.6064 0.066 Uiso 1 1 calc R U . . . 
H27B H 0.5165 0.9623 0.5626 0.066 Uiso 1 1 calc R U . . . 
H27C H 0.5758 0.9252 0.6135 0.066 Uiso 1 1 calc R U . . . 
C28 C 0.40637(10) 0.7569(2) 0.76224(8) 0.0288(5) Uani 1 1 d . . . . . 
C29 C 0.34442(10) 0.7225(3) 0.74956(9) 0.0360(6) Uani 1 1 d . . . . . 
H29 H 0.3327 0.6358 0.7409 0.043 Uiso 1 1 calc R U . . . 
C30 C 0.29981(13) 0.8112(4) 0.74923(11) 0.0595(9) Uani 1 1 d . . . . . 
H30 H 0.2580 0.7850 0.7406 0.071 Uiso 1 1 calc R U . . . 
C31 C 0.31528(19) 0.9364(4) 0.76123(11) 0.0799(14) Uani 1 1 d . . . . . 
H31 H 0.2845 0.9977 0.7609 0.096 Uiso 1 1 calc R U . . . 
C32 C 0.3764(2) 0.9730(3) 0.77387(12) 0.0795(13) Uani 1 1 d . . . . . 
H32 H 0.3874 1.0601 0.7822 0.095 Uiso 1 1 calc R U . . . 
C33 C 0.42213(15) 0.8837(3) 0.77461(11) 0.0513(7) Uani 1 1 d . . . . . 
H33 H 0.4640 0.9101 0.7836 0.062 Uiso 1 1 calc R U . . . 
N1 N 0.38439(7) 0.60112(16) 0.58257(6) 0.0185(3) Uani 1 1 d . . . . . 
N2 N 0.47877(7) 0.59753(16) 0.58223(6) 0.0180(3) Uani 1 1 d . . . . . 
O1 O 0.44778(6) 0.66601(15) 0.76095(6) 0.0287(3) Uani 1 1 d . . . . . 
Ni1 Ni 0.46319(2) 0.65137(2) 0.69077(2) 0.01885(9) Uani 1 1 d . . . . . 
  
loop_ 
 _atom_site_aniso_label 
 _atom_site_aniso_U_11 
 _atom_site_aniso_U_22 
 _atom_site_aniso_U_33 
 _atom_site_aniso_U_23 
 _atom_site_aniso_U_13 
 _atom_site_aniso_U_12 
C1 0.0185(9) 0.0155(9) 0.0220(10) 0.0002(8) 0.0080(8) 0.0013(8) 
C2 0.0201(10) 0.0260(11) 0.0169(10) -0.0027(8) 0.0057(8) 0.0004(8) 
C3 0.0189(9) 0.0260(11) 0.0169(10) -0.0035(8) 0.0063(8) 0.0003(8) 
C4 0.0148(9) 0.0265(11) 0.0134(9) -0.0030(8) 0.0030(7) 0.0006(8) 
C5 0.0190(9) 0.0250(11) 0.0155(9) -0.0025(8) 0.0041(8) 0.0005(8) 
C6 0.0227(10) 0.0270(11) 0.0254(11) -0.0018(9) 0.0073(8) 0.0062(9) 
C7 0.0196(10) 0.0379(13) 0.0294(11) -0.0005(10) 0.0122(9) 0.0030(9) 
C8 0.0223(10) 0.0320(12) 0.0277(11) 0.0023(9) 0.0099(9) -0.0030(9) 
C9 0.0199(10) 0.0244(11) 0.0200(10) -0.0014(8) 0.0046(8) 0.0005(8) 
C10 0.0202(10) 0.0222(11) 0.0222(10) -0.0018(8) 0.0052(8) 0.0010(8) 
C11 0.0315(12) 0.0272(12) 0.0278(12) 0.0044(9) 0.0039(9) -0.0039(9) 
C12 0.0319(12) 0.0283(12) 0.0299(12) -0.0013(10) 0.0013(9) -0.0045(10) 
C13 0.0231(10) 0.0257(11) 0.0381(13) 0.0041(10) 0.0092(9) 0.0009(9) 
C14 0.0590(16) 0.0254(12) 0.0409(14) 0.0007(11) 0.0230(12) 0.0037(11) 
C15 0.0509(15) 0.0318(13) 0.0348(13) 0.0081(11) 0.0071(11) 0.0026(11) 
C16 0.0157(9) 0.0246(11) 0.0178(9) -0.0066(8) 0.0054(7) 0.0016(8) 
C17 0.0227(10) 0.0270(11) 0.0196(10) -0.0050(8) 0.0070(8) 0.0047(9) 
C18 0.0257(11) 0.0313(12) 0.0274(11) -0.0056(9) 0.0037(9) 0.0091(9) 
C19 0.0186(10) 0.0424(14) 0.0345(12) -0.0125(11) 0.0048(9) 0.0044(10) 
C20 0.0203(10) 0.0357(13) 0.0320(12) -0.0108(10) 0.0111(9) -0.0061(9) 
C21 0.0210(10) 0.0286(11) 0.0204(10) -0.0074(9) 0.0088(8) -0.0017(8) 
C22 0.0265(11) 0.0248(11) 0.0271(11) 0.0041(9) 0.0094(9) 0.0072(9) 
C23 0.0377(13) 0.0291(12) 0.0281(12) -0.0034(10) 0.0095(10) -0.0007(10) 
C24 0.083(2) 0.0310(14) 0.0333(14) -0.0022(11) 0.0274(14) -0.0017(13) 
C25 0.0277(11) 0.0290(12) 0.0248(11) -0.0021(9) 0.0100(9) -0.0051(9) 
C26 0.0381(13) 0.0468(15) 0.0356(13) 0.0040(11) 0.0142(11) -0.0117(12) 
C27 0.0663(18) 0.0288(13) 0.0398(14) -0.0019(11) 0.0205(13) 0.0040(12) 
C28 0.0310(11) 0.0433(13) 0.0110(9) 0.0005(9) 0.0053(8) 0.0080(10) 
C29 0.0282(12) 0.0574(16) 0.0246(11) 0.0071(11) 0.0115(9) 0.0128(11) 
C30 0.0436(16) 0.108(3) 0.0285(14) 0.0053(16) 0.0135(12) 0.0399(17) 
C31 0.101(3) 0.105(3) 0.0208(14) -0.0041(16) 0.0020(16) 0.078(3) 
C32 0.140(4) 0.0464(19) 0.0294(16) -0.0098(13) -0.0033(19) 0.032(2) 
C33 0.0664(19) 0.0463(16) 0.0300(14) -0.0081(12) 0.0001(12) 0.0034(14) 
N1 0.0134(8) 0.0281(9) 0.0134(8) -0.0064(7) 0.0033(6) 0.0029(7) 
N2 0.0147(8) 0.0221(9) 0.0172(8) -0.0034(7) 0.0052(6) 0.0011(7) 
O1 0.0240(7) 0.0467(10) 0.0162(7) 0.0017(6) 0.0077(6) 0.0110(7) 
Ni1 0.01826(14) 0.02320(15) 0.01414(13) -0.00171(10) 0.00395(10) 0.00195(10) 
  
_geom_special_details 
; 
 All esds (except the esd in the dihedral angle between two l.s. planes) 
 are estimated using the full covariance matrix.  The cell esds are taken 
 into account individually in the estimation of esds in distances, angles 
 and torsion angles; correlations between esds in cell parameters are only 
 used when they are defined by crystal symmetry.  An approximate (isotropic) 
 treatment of cell esds is used for estimating esds involving l.s. planes. 
; 
  
loop_ 
 _geom_bond_atom_site_label_1 
 _geom_bond_atom_site_label_2 
 _geom_bond_distance 
 _geom_bond_site_symmetry_2 
 _geom_bond_publ_flag 
C1 N1 1.355(2) . ? 
C1 N2 1.368(2) . ? 
C1 Ni1 1.8795(19) . ? 
C2 N1 1.471(2) . ? 
C2 C3 1.514(3) . ? 
C2 H2A 0.9900 . ? 
C2 H2B 0.9900 . ? 
C3 N2 1.474(2) . ? 
C3 H3A 0.9900 . ? 
C3 H3B 0.9900 . ? 
C4 C5 1.399(3) . ? 
C4 C9 1.401(3) . ? 
C4 N1 1.442(2) . ? 
C5 C6 1.400(3) . ? 
C5 C10 1.515(3) . ? 
C6 C7 1.382(3) . ? 
C6 H6 0.9500 . ? 
C7 C8 1.379(3) . ? 
C7 H7 0.9500 . ? 
C8 C9 1.395(3) . ? 
C8 H8 0.9500 . ? 
C9 C13 1.516(3) . ? 
C10 C11 1.528(3) . ? 
C10 C12 1.531(3) . ? 
C10 H10 1.0000 . ? 
C11 H11A 0.9800 . ? 
C11 H11B 0.9800 . ? 
C11 H11C 0.9800 . ? 
C12 H12A 0.9800 . ? 
C12 H12B 0.9800 . ? 
C12 H12C 0.9800 . ? 
C13 C15 1.530(3) . ? 
C13 C14 1.532(3) . ? 
C13 H13 1.0000 . ? 
C14 H14A 0.9800 . ? 
C14 H14B 0.9800 . ? 
C14 H14C 0.9800 . ? 
C15 H15A 0.9800 . ? 
C15 H15B 0.9800 . ? 
C15 H15C 0.9800 . ? 
C16 C17 1.401(3) . ? 
C16 C21 1.401(3) . ? 
C16 N2 1.438(2) . ? 
C17 C18 1.398(3) . ? 
C17 C22 1.516(3) . ? 
C18 C19 1.383(3) . ? 
C18 H18 0.9500 . ? 
C19 C20 1.381(3) . ? 
C19 H19 0.9500 . ? 
C20 C21 1.393(3) . ? 
C20 H20 0.9500 . ? 
C21 C25 1.523(3) . ? 
C22 C24 1.521(3) . ? 
C22 C23 1.524(3) . ? 
C22 H22 1.0000 . ? 
C23 H23A 0.9800 . ? 
C23 H23B 0.9800 . ? 
C23 H23C 0.9800 . ? 
C24 H24A 0.9800 . ? 
C24 H24B 0.9800 . ? 
C24 H24C 0.9800 . ? 
C25 C27 1.529(3) . ? 
C25 C26 1.534(3) . ? 
C25 H25 1.0000 . ? 
C26 H26A 0.9800 . ? 
C26 H26B 0.9800 . ? 
C26 H26C 0.9800 . ? 
C27 H27A 0.9800 . ? 
C27 H27B 0.9800 . ? 
C27 H27C 0.9800 . ? 
C28 O1 1.349(3) . ? 
C28 C33 1.383(4) . ? 
C28 C29 1.395(3) . ? 
C29 C30 1.376(4) . ? 
C29 H29 0.9500 . ? 
C30 C31 1.364(5) . ? 
C30 H30 0.9500 . ? 
C31 C32 1.383(6) . ? 
C31 H31 0.9500 . ? 
C32 C33 1.397(5) . ? 
C32 H32 0.9500 . ? 
C33 H33 0.9500 . ? 
O1 Ni1 1.9579(14) . ? 
O1 Ni1 2.0198(14) 2_656 ? 
Ni1 O1 2.0198(14) 2_656 ? 
Ni1 Ni1 2.9711(5) 2_656 ? 
  
loop_ 
 _geom_angle_atom_site_label_1 
 _geom_angle_atom_site_label_2 
 _geom_angle_atom_site_label_3 
 _geom_angle 
 _geom_angle_site_symmetry_1 
 _geom_angle_site_symmetry_3 
 _geom_angle_publ_flag 
N1 C1 N2 105.19(16) . . ? 
N1 C1 Ni1 121.72(13) . . ? 
N2 C1 Ni1 133.06(14) . . ? 
N1 C2 C3 100.81(14) . . ? 
N1 C2 H2A 111.6 . . ? 
C3 C2 H2A 111.6 . . ? 
N1 C2 H2B 111.6 . . ? 
C3 C2 H2B 111.6 . . ? 
H2A C2 H2B 109.4 . . ? 
N2 C3 C2 101.72(15) . . ? 
N2 C3 H3A 111.4 . . ? 
C2 C3 H3A 111.4 . . ? 
N2 C3 H3B 111.4 . . ? 
C2 C3 H3B 111.4 . . ? 
H3A C3 H3B 109.3 . . ? 
C5 C4 C9 122.79(17) . . ? 
C5 C4 N1 118.40(17) . . ? 
C9 C4 N1 118.68(17) . . ? 
C4 C5 C6 117.25(18) . . ? 
C4 C5 C10 122.41(17) . . ? 
C6 C5 C10 120.33(18) . . ? 
C7 C6 C5 120.90(19) . . ? 
C7 C6 H6 119.5 . . ? 
C5 C6 H6 119.5 . . ? 
C8 C7 C6 120.62(19) . . ? 
C8 C7 H7 119.7 . . ? 
C6 C7 H7 119.7 . . ? 
C7 C8 C9 120.9(2) . . ? 
C7 C8 H8 119.6 . . ? 
C9 C8 H8 119.6 . . ? 
C8 C9 C4 117.52(19) . . ? 
C8 C9 C13 120.48(19) . . ? 
C4 C9 C13 121.99(17) . . ? 
C5 C10 C11 112.10(16) . . ? 
C5 C10 C12 110.48(17) . . ? 
C11 C10 C12 110.98(18) . . ? 
C5 C10 H10 107.7 . . ? 
C11 C10 H10 107.7 . . ? 
C12 C10 H10 107.7 . . ? 
C10 C11 H11A 109.5 . . ? 
C10 C11 H11B 109.5 . . ? 
H11A C11 H11B 109.5 . . ? 
C10 C11 H11C 109.5 . . ? 
H11A C11 H11C 109.5 . . ? 
H11B C11 H11C 109.5 . . ? 
C10 C12 H12A 109.5 . . ? 
C10 C12 H12B 109.5 . . ? 
H12A C12 H12B 109.5 . . ? 
C10 C12 H12C 109.5 . . ? 
H12A C12 H12C 109.5 . . ? 
H12B C12 H12C 109.5 . . ? 
C9 C13 C15 112.27(19) . . ? 
C9 C13 C14 111.27(18) . . ? 
C15 C13 C14 109.50(19) . . ? 
C9 C13 H13 107.9 . . ? 
C15 C13 H13 107.9 . . ? 
C14 C13 H13 107.9 . . ? 
C13 C14 H14A 109.5 . . ? 
C13 C14 H14B 109.5 . . ? 
H14A C14 H14B 109.5 . . ? 
C13 C14 H14C 109.5 . . ? 
H14A C14 H14C 109.5 . . ? 
H14B C14 H14C 109.5 . . ? 
C13 C15 H15A 109.5 . . ? 
C13 C15 H15B 109.5 . . ? 
H15A C15 H15B 109.5 . . ? 
C13 C15 H15C 109.5 . . ? 
H15A C15 H15C 109.5 . . ? 
H15B C15 H15C 109.5 . . ? 
C17 C16 C21 122.32(18) . . ? 
C17 C16 N2 119.35(17) . . ? 
C21 C16 N2 118.21(18) . . ? 
C18 C17 C16 117.39(19) . . ? 
C18 C17 C22 120.04(19) . . ? 
C16 C17 C22 122.54(17) . . ? 
C19 C18 C17 121.0(2) . . ? 
C19 C18 H18 119.5 . . ? 
C17 C18 H18 119.5 . . ? 
C20 C19 C18 120.4(2) . . ? 
C20 C19 H19 119.8 . . ? 
C18 C19 H19 119.8 . . ? 
C19 C20 C21 120.8(2) . . ? 
C19 C20 H20 119.6 . . ? 
C21 C20 H20 119.6 . . ? 
C20 C21 C16 117.8(2) . . ? 
C20 C21 C25 121.31(19) . . ? 
C16 C21 C25 120.86(18) . . ? 
C17 C22 C24 112.16(19) . . ? 
C17 C22 C23 111.55(17) . . ? 
C24 C22 C23 110.20(18) . . ? 
C17 C22 H22 107.6 . . ? 
C24 C22 H22 107.6 . . ? 
C23 C22 H22 107.6 . . ? 
C22 C23 H23A 109.5 . . ? 
C22 C23 H23B 109.5 . . ? 
H23A C23 H23B 109.5 . . ? 
C22 C23 H23C 109.5 . . ? 
H23A C23 H23C 109.5 . . ? 
H23B C23 H23C 109.5 . . ? 
C22 C24 H24A 109.5 . . ? 
C22 C24 H24B 109.5 . . ? 
H24A C24 H24B 109.5 . . ? 
C22 C24 H24C 109.5 . . ? 
H24A C24 H24C 109.5 . . ? 
H24B C24 H24C 109.5 . . ? 
C21 C25 C27 111.66(18) . . ? 
C21 C25 C26 113.29(18) . . ? 
C27 C25 C26 109.7(2) . . ? 
C21 C25 H25 107.3 . . ? 
C27 C25 H25 107.3 . . ? 
C26 C25 H25 107.3 . . ? 
C25 C26 H26A 109.5 . . ? 
C25 C26 H26B 109.5 . . ? 
H26A C26 H26B 109.5 . . ? 
C25 C26 H26C 109.5 . . ? 
H26A C26 H26C 109.5 . . ? 
H26B C26 H26C 109.5 . . ? 
C25 C27 H27A 109.5 . . ? 
C25 C27 H27B 109.5 . . ? 
H27A C27 H27B 109.5 . . ? 
C25 C27 H27C 109.5 . . ? 
H27A C27 H27C 109.5 . . ? 
H27B C27 H27C 109.5 . . ? 
O1 C28 C33 123.1(2) . . ? 
O1 C28 C29 118.9(2) . . ? 
C33 C28 C29 118.0(2) . . ? 
C30 C29 C28 121.6(3) . . ? 
C30 C29 H29 119.2 . . ? 
C28 C29 H29 119.2 . . ? 
C31 C30 C29 120.4(3) . . ? 
C31 C30 H30 119.8 . . ? 
C29 C30 H30 119.8 . . ? 
C30 C31 C32 119.1(3) . . ? 
C30 C31 H31 120.4 . . ? 
C32 C31 H31 120.4 . . ? 
C31 C32 C33 121.0(3) . . ? 
C31 C32 H32 119.5 . . ? 
C33 C32 H32 119.5 . . ? 
C28 C33 C32 119.8(3) . . ? 
C28 C33 H33 120.1 . . ? 
C32 C33 H33 120.1 . . ? 
C1 N1 C4 124.90(15) . . ? 
C1 N1 C2 114.05(15) . . ? 
C4 N1 C2 119.64(14) . . ? 
C1 N2 C16 123.92(16) . . ? 
C1 N2 C3 112.51(15) . . ? 
C16 N2 C3 119.35(15) . . ? 
C28 O1 Ni1 114.59(12) . . ? 
C28 O1 Ni1 127.91(13) . 2_656 ? 
Ni1 O1 Ni1 96.64(6) . 2_656 ? 
C1 Ni1 O1 156.13(7) . . ? 
C1 Ni1 O1 120.43(7) . 2_656 ? 
O1 Ni1 O1 82.68(6) . 2_656 ? 
C1 Ni1 Ni1 158.00(6) . 2_656 ? 
O1 Ni1 Ni1 42.47(4) . 2_656 ? 
O1 Ni1 Ni1 40.89(4) 2_656 2_656 ? 
  
_refine_diff_density_max    0.436 
_refine_diff_density_min   -0.328 
_refine_diff_density_rms    0.054 
  
_shelx_res_file 
; 
  
    shelx.res created by SHELXL-2014/7 
  
TITL hartwig132_0m_a.res in C2/c 
CELL  0.71073  22.8854  10.4415  25.7766   90.000  108.919   90.000 
ZERR     4.00   0.0018   0.0009   0.0022    0.000    0.004    0.000 
LATT   7 
SYMM  - X,   Y, 1/2 - Z 
SFAC  C    H    N    O    NI 
UNIT  264 344 16 8 8 
MERG   2 
FMAP   2 
PLAN   20 
SIZE     0.020   0.060   0.060 
ACTA    50.00 
BOND   $H 
LIST   4 
WPDB  -2 
L.S.  10 
TEMP  -173.00 
WGHT    0.036700   11.386800 
FVAR       0.07404 
C1    1    0.443554    0.616712    0.615492    11.00000    0.01851    0.01549 = 
         0.02198    0.00015    0.00803    0.00127 
C2    1    0.377585    0.584450    0.524233    11.00000    0.02009    0.02604 = 
         0.01686   -0.00273    0.00568    0.00041 
AFIX  23 
H2A   2    0.365094    0.665208    0.503465    11.00000   -1.20000 
H2B   2    0.347355    0.516429    0.507086    11.00000   -1.20000 
AFIX   0 
C3    1    0.442655    0.545801    0.528146    11.00000    0.01895    0.02604 = 
         0.01688   -0.00347    0.00629    0.00032 
AFIX  23 
H3A   2    0.446798    0.451573    0.526871    11.00000   -1.20000 
H3B   2    0.455270    0.584999    0.498450    11.00000   -1.20000 
AFIX   0 
C4    1    0.330577    0.626400    0.598451    11.00000    0.01483    0.02651 = 
         0.01343   -0.00304    0.00302    0.00057 
C5    1    0.307500    0.751448    0.593377    11.00000    0.01902    0.02505 = 
         0.01552   -0.00246    0.00411    0.00054 
C6    1    0.251565    0.770813    0.603343    11.00000    0.02270    0.02698 = 
         0.02540   -0.00179    0.00731    0.00622 
AFIX  43 
H6    2    0.234392    0.854438    0.600070    11.00000   -1.20000 
AFIX   0 
C7    1    0.220964    0.669921    0.617884    11.00000    0.01962    0.03792 = 
         0.02942   -0.00050    0.01224    0.00300 
AFIX  43 
H7    2    0.182556    0.684577    0.623636    11.00000   -1.20000 
AFIX   0 
C8    1    0.245666    0.548179    0.624120    11.00000    0.02229    0.03202 = 
         0.02768    0.00226    0.00992   -0.00305 
AFIX  43 
H8    2    0.224504    0.480260    0.634925    11.00000   -1.20000 
AFIX   0 
C9    1    0.301327    0.523485    0.614767    11.00000    0.01992    0.02444 = 
         0.02002   -0.00145    0.00456    0.00046 
C10   1    0.341202    0.863353    0.578633    11.00000    0.02021    0.02225 = 
         0.02219   -0.00184    0.00524    0.00098 
AFIX  13 
H10   2    0.374870    0.827790    0.566010    11.00000   -1.20000 
AFIX   0 
C11   1    0.298903    0.943372    0.531826    11.00000    0.03151    0.02716 = 
         0.02781    0.00444    0.00395   -0.00386 
AFIX 137 
H11A  2    0.279198    0.887795    0.500372    11.00000   -1.50000 
H11B  2    0.323293    1.009198    0.521104    11.00000   -1.50000 
H11C  2    0.267080    0.984460    0.543976    11.00000   -1.50000 
AFIX   0 
C12   1    0.371431    0.946401    0.629163    11.00000    0.03192    0.02834 = 
         0.02987   -0.00125    0.00130   -0.00446 
AFIX 137 
H12A  2    0.339503    0.980683    0.643071    11.00000   -1.50000 
H12B  2    0.393666    1.017346    0.619107    11.00000   -1.50000 
H12C  2    0.400480    0.894348    0.657666    11.00000   -1.50000 
AFIX   0 
C13   1    0.327898    0.389137    0.621332    11.00000    0.02311    0.02575 = 
         0.03811    0.00411    0.00921    0.00087 
AFIX  13 
H13   2    0.373110    0.396159    0.626930    11.00000   -1.20000 
AFIX   0 
C14   1    0.298562    0.308787    0.569694    11.00000    0.05898    0.02544 = 
         0.04090    0.00069    0.02300    0.00375 
AFIX 137 
H14A  2    0.253970    0.302124    0.562818    11.00000   -1.50000 
H14B  2    0.316863    0.222944    0.574961    11.00000   -1.50000 
H14C  2    0.306086    0.349893    0.538271    11.00000   -1.50000 
AFIX   0 
C15   1    0.320309    0.320096    0.671129    11.00000    0.05093    0.03179 = 
         0.03476    0.00805    0.00708    0.00257 
AFIX 137 
H15A  2    0.335584    0.375049    0.703550    11.00000   -1.50000 
H15B  2    0.343950    0.240067    0.677403    11.00000   -1.50000 
H15C  2    0.276533    0.300960    0.664324    11.00000   -1.50000 
AFIX   0 
C16   1    0.544584    0.579367    0.602100    11.00000    0.01569    0.02459 = 
         0.01780   -0.00663    0.00536    0.00156 
C17   1    0.568999    0.468265    0.631642    11.00000    0.02271    0.02699 = 
         0.01956   -0.00499    0.00700    0.00469 
C18   1    0.633288    0.455414    0.650799    11.00000    0.02571    0.03132 = 
         0.02736   -0.00563    0.00375    0.00909 
AFIX  43 
H18   2    0.651373    0.382400    0.671906    11.00000   -1.20000 
AFIX   0 
C19   1    0.670935    0.547352    0.639491    11.00000    0.01865    0.04239 = 
         0.03451   -0.01253    0.00476    0.00436 
AFIX  43 
H19   2    0.714546    0.538083    0.653671    11.00000   -1.20000 
AFIX   0 
C20   1    0.645547    0.652534    0.607722    11.00000    0.02033    0.03569 = 
         0.03204   -0.01081    0.01112   -0.00607 
AFIX  43 
H20   2    0.671882    0.713429    0.599159    11.00000   -1.20000 
AFIX   0 
C21   1    0.581788    0.670530    0.588055    11.00000    0.02098    0.02859 = 
         0.02043   -0.00744    0.00881   -0.00173 
C22   1    0.528545    0.362348    0.641536    11.00000    0.02654    0.02484 = 
         0.02710    0.00409    0.00945    0.00716 
AFIX  13 
H22   2    0.484653    0.391440    0.626206    11.00000   -1.20000 
AFIX   0 
C23   1    0.534729    0.239632    0.611768    11.00000    0.03772    0.02914 = 
         0.02811   -0.00338    0.00946   -0.00075 
AFIX 137 
H23A  2    0.525897    0.257794    0.572670    11.00000   -1.50000 
H23B  2    0.505383    0.175750    0.616295    11.00000   -1.50000 
H23C  2    0.576885    0.206416    0.627191    11.00000   -1.50000 
AFIX   0 
C24   1    0.541821    0.335810    0.702311    11.00000    0.08339    0.03098 = 
         0.03327   -0.00220    0.02739   -0.00167 
AFIX 137 
H24A  2    0.583985    0.302891    0.718131    11.00000   -1.50000 
H24B  2    0.512438    0.272154    0.706950    11.00000   -1.50000 
H24C  2    0.537591    0.415291    0.720999    11.00000   -1.50000 
AFIX   0 
C25   1    0.553257    0.786039    0.552868    11.00000    0.02765    0.02903 = 
         0.02476   -0.00213    0.00995   -0.00510 
AFIX  13 
H25   2    0.513548    0.757117    0.525451    11.00000   -1.20000 
AFIX   0 
C26   1    0.593619    0.839969    0.520733    11.00000    0.03811    0.04676 = 
         0.03560    0.00402    0.01420   -0.01167 
AFIX 137 
H26A  2    0.570568    0.905910    0.495199    11.00000   -1.50000 
H26B  2    0.604941    0.770775    0.500130    11.00000   -1.50000 
H26C  2    0.631137    0.877679    0.546338    11.00000   -1.50000 
AFIX   0 
C27   1    0.537662    0.892596    0.586918    11.00000    0.06629    0.02882 = 
         0.03981   -0.00191    0.02055    0.00398 
AFIX 137 
H27A  2    0.510708    0.858564    0.606415    11.00000   -1.50000 
H27B  2    0.516462    0.962331    0.562636    11.00000   -1.50000 
H27C  2    0.575824    0.925178    0.613523    11.00000   -1.50000 
AFIX   0 
C28   1    0.406374    0.756860    0.762239    11.00000    0.03096    0.04330 = 
         0.01105    0.00047    0.00529    0.00800 
C29   1    0.344417    0.722542    0.749560    11.00000    0.02816    0.05745 = 
         0.02459    0.00713    0.01148    0.01279 
AFIX  43 
H29   2    0.332726    0.635812    0.740942    11.00000   -1.20000 
AFIX   0 
C30   1    0.299815    0.811155    0.749225    11.00000    0.04361    0.10780 = 
         0.02853    0.00526    0.01351    0.03985 
AFIX  43 
H30   2    0.257987    0.784953    0.740579    11.00000   -1.20000 
AFIX   0 
C31   1    0.315276    0.936387    0.761228    11.00000    0.10083    0.10525 = 
         0.02078   -0.00407    0.00201    0.07755 
AFIX  43 
H31   2    0.284478    0.997670    0.760906    11.00000   -1.20000 
AFIX   0 
C32   1    0.376380    0.972977    0.773873    11.00000    0.14046    0.04643 = 
         0.02936   -0.00980   -0.00333    0.03196 
AFIX  43 
H32   2    0.387421    1.060116    0.782186    11.00000   -1.20000 
AFIX   0 
C33   1    0.422131    0.883710    0.774607    11.00000    0.06638    0.04626 = 
         0.02997   -0.00811    0.00015    0.00343 
AFIX  43 
H33   2    0.463964    0.910123    0.783585    11.00000   -1.20000 
AFIX   0 
N1    3    0.384388    0.601117    0.582571    11.00000    0.01335    0.02809 = 
         0.01341   -0.00644    0.00326    0.00288 
N2    3    0.478767    0.597532    0.582233    11.00000    0.01465    0.02212 = 
         0.01717   -0.00339    0.00522    0.00109 
O1    4    0.447782    0.666010    0.760946    11.00000    0.02400    0.04669 = 
         0.01618    0.00175    0.00767    0.01102 
NI1   5    0.463187    0.651368    0.690768    11.00000    0.01826    0.02320 = 
         0.01414   -0.00171    0.00395    0.00195 
HKLF    4 
  
REM  hartwig132_0m_a.res in C2/c 
REM R1 =  0.0355 for    4659 Fo > 4sig(Fo)  and  0.0432 for all    5360 data 
REM    342 parameters refined using      0 restraints 
  
END 
  
WGHT      0.0361     11.5022 
  
REM Highest difference peak  0.436,  deepest hole -0.328,  1-sigma level  0.054 
Q1    1   0.3904  0.6612  0.5724  11.00000  0.05    0.44 
Q2    1   0.4609  1.0441  0.6899  11.00000  0.05    0.42 
Q3    1   0.4922  0.7001  0.6797  11.00000  0.05    0.38 
Q4    1   0.3565  0.6112  0.5911  11.00000  0.05    0.36 
Q5    1   0.4569  0.7468  0.7570  11.00000  0.05    0.35 
Q6    1   0.3483  0.9747  0.7588  11.00000  0.05    0.33 
Q7    1   0.4318  0.6113  0.7412  11.00000  0.05    0.31 
Q8    1   0.4491  0.5934  0.6440  11.00000  0.05    0.31 
Q9    1   0.5995  0.3758  0.7608  11.00000  0.05    0.29 
Q10   1   0.4653  0.6379  0.7757  11.00000  0.05    0.29 
Q11   1   0.4312  0.6782  0.7671  11.00000  0.05    0.27 
Q12   1   0.2906  0.7602  0.6062  11.00000  0.05    0.27 
Q13   1   0.2485  0.7323  0.7409  11.00000  0.05    0.26 
Q14   1   0.3089  0.9161  0.7671  11.00000  0.05    0.25 
Q15   1   0.4065  0.5776  0.5992  11.00000  0.05    0.25 
Q16   1   0.4005  0.9624  0.7589  11.00000  0.05    0.25 
Q17   1   0.3239  0.6918  0.5973  11.00000  0.05    0.24 
Q18   1   0.3519  0.8975  0.6046  11.00000  0.05    0.23 
Q19   1   0.3110  0.4588  0.6155  11.00000  0.05    0.23 
Q20   1   0.3247  0.8060  0.5871  11.00000  0.05    0.22 
; 
_shelx_res_checksum   60348 
  
_shelx_hkl_file 
; 
   2   0   0  255.49    8.43 
   2   0   0  263.23    8.43 
   2   0   0  253.66    8.41 
   2   0   0  263.84    8.41 
   2   0   0  264.73    8.42 
  -2   0   0  268.26    8.41 
  -2   0   0  255.92    8.40 
  -2   0   0  253.65    8.41 
  -2   0   0  256.04    8.49 
  -2   0   0  268.05    8.42 
  -2   0   0  261.74    8.47 
  -2   0   0  266.15    8.42 
  -2   0   0  265.62    8.43 
  -2   0   0  254.21    8.41 
  -2   0   0  259.70    8.41 
   2   0   0  265.24    8.41 
   2   0   0  259.99    8.41 
   2   0   0  254.76    8.40 
   2   0   0  261.53    8.41 
   2   0   0  256.71    8.52 
   2   0   0  254.70    8.47 
   4   0   0   10.74    0.50 
   4   0   0    9.40    0.46 
   4   0   0    9.83    0.46 
   4   0   0    9.73    0.46 
   4   0   0   10.09    0.44 
   4   0   0   10.26    0.39 
   4   0   0   10.21    0.52 
   4   0   0    9.64    0.47 
   4   0   0   10.73    0.49 
  -4   0   0   10.68    0.39 
  -4   0   0   11.26    0.52 
  -4   0   0   10.06    0.48 
  -4   0   0   10.51    0.48 
   4   0   0    9.33    0.48 
  -4   0   0   10.90    0.61 
  -4   0   0    9.85    0.46 
  -4   0   0   10.93    0.44 
  -4   0   0   10.55    0.49 
  -4   0   0   10.72    0.47 
   4   0   0   10.63    0.59 
  -6   0   0   56.95    2.04 
  -6   0   0   56.67    1.97 
   6   0   0   58.35    2.14 
   6   0   0   53.72    1.86 
  -6   0   0   56.56    1.98 
  -6   0   0   52.94    1.92 
  -6   0   0   54.78    1.86 
   6   0   0   55.74    2.03 
   6   0   0   56.09    1.96 
   6   0   0   56.86    1.98 
   6   0   0   53.52    1.96 
   6   0   0   56.93    1.98 
   6   0   0   54.15    1.93 
   6   0   0   57.18    1.99 
  -6   0   0   55.57    1.95 
  -6   0   0   54.59    1.96 
   6   0   0   53.14    1.96 
  -6   0   0   56.25    2.00 
  -6   0   0   56.21    2.15 
   6   0   0   55.00    1.96 
   6   0   0   58.07    1.99 
  -8   0   0  341.89   11.40 
  -8   0   0  339.27   11.01 
  -8   0   0  348.98   11.19 
  -8   0   0  341.61   11.08 
  -8   0   0  332.55   11.10 
   8   0   0  342.90   11.12 
   8   0   0  353.84   11.18 
   8   0   0  329.11   11.35 
   8   0   0  342.97   11.02 
  -8   0   0  350.15   11.25 
  -8   0   0  336.39   11.17 
  -8   0   0  332.98   11.12 
   8   0   0  349.02   11.18 
  -8   0   0  331.60   11.15 
   8   0   0  345.97   11.17 
   8   0   0  341.54   11.13 
  -8   0   0  332.80   11.14 
   8   0   0  337.61   11.15 
   8   0   0  340.42   11.16 
   8   0   0  329.77   11.15 
   8   0   0  340.23   11.24 
  10   0   0  300.45    9.72 
  10   0   0  295.01    9.96 
  10   0   0  291.87    9.80 
 -10   0   0  296.96    9.68 
  10   0   0  299.86    9.71 
 -10   0   0  294.33    9.63 
 -10   0   0  295.90    9.73 
 -10   0   0  289.31   10.00 
 -10   0   0  293.91    9.51 
 -10   0   0  290.06    9.69 
 -10   0   0  287.40    9.72 
 -10   0   0  294.26    9.66 
  10   0   0  285.55    9.70 
  10   0   0  301.41    9.71 
  10   0   0  286.94    9.70 
  10   0   0  279.32    9.64 
  10   0   0  285.75    9.65 
 -10   0   0  298.71    9.59 
  12   0   0  231.32    7.60 
  12   0   0  225.56    7.68 
 -12   0   0  218.87    7.59 
  12   0   0  231.19    7.58 
 -12   0   0  222.03    7.42 
 -12   0   0  231.56    7.54 
  12   0   0  218.37    7.84 
 -12   0   0  226.71    7.34 
 -12   0   0  226.04    7.61 
  12   0   0  226.12    7.58 
  12   0   0  223.04    7.59 
 -12   0   0  220.97    7.94 
  12   0   0  224.43    7.60 
  12   0   0  225.34    7.51 
 -12   0   0  219.77    7.48 
  12   0   0  219.88    7.51 
 -12   0   0  220.58    7.55 
  14   0   0  230.41    8.04 
  14   0   0  237.52    7.92 
 -14   0   0  238.69    7.97 
 -14   0   0  229.18    7.90 
 -14   0   0  227.64    7.71 
  14   0   0  232.88    7.93 
  14   0   0  238.33    7.98 
  14   0   0  231.21    7.86 
  14   0   0  226.72    8.24 
  14   0   0  229.34    7.95 
  14   0   0  233.73    7.84 
 -14   0   0  236.28    7.66 
 -14   0   0  233.74    7.95 
 -14   0   0  236.96    7.87 
  14   0   0  232.33    7.91 
 -14   0   0  232.92    8.38 
 -14   0   0  232.63    7.83 
 -16   0   0   15.30    0.93 
  16   0   0   16.10    1.03 
 -16   0   0   18.29    1.13 
  16   0   0   15.61    1.16 
  16   0   0   17.95    1.06 
  16   0   0   16.32    1.11 
  16   0   0   14.35    1.04 
  16   0   0   15.75    1.07 
  16   0   0   16.82    1.09 
 -16   0   0   15.71    0.97 
 -16   0   0   16.74    1.12 
 -16   0   0   15.08    1.41 
 -16   0   0   16.00    1.04 
 -16   0   0   16.30    0.80 
 -16   0   0   16.61    0.77 
 -18   0   0   22.11    1.30 
 -18   0   0   21.66    0.97 
  18   0   0   20.30    1.44 
 -18   0   0   20.01    0.96 
 -18   0   0   22.79    1.36 
 -18   0   0   24.70    1.43 
 -18   0   0   20.33    1.46 
  18   0   0   19.78    1.41 
  18   0   0   19.99    1.26 
 -18   0   0   22.34    1.23 
  18   0   0   19.82    1.40 
 -18   0   0   21.47    1.77 
 -20   0   0    0.92    0.34 
 -20   0   0    1.20    0.59 
  20   0   0    1.20    0.54 
 -20   0   0   -0.63    0.52 
 -20   0   0    0.97    0.86 
  20   0   0    1.06    0.72 
 -20   0   0    0.67    0.46 
  20   0   0    1.17    0.68 
 -20   0   0    1.26    0.61 
 -22   0   0    0.88    0.70 
 -22   0   0    0.43    0.50 
 -22   0   0    0.99    1.10 
 -22   0   0    0.87    0.65 
  22   0   0    0.04    0.75 
  22   0   0    1.00    0.77 
 -22   0   0    0.73    0.65 
 -24   0   0   40.85    2.41 
  24   0   0   44.91    2.75 
  24   0   0   43.64    2.46 
 -24   0   0   44.21    2.34 
 -24   0   0   42.28    3.11 
 -26   0   0    3.32    0.95 
  26   0   0    2.82    1.10 
 -26   0   0    4.16    1.21 
  -1  -1   0  752.80   24.41 
   1  -1   0  748.86   24.25 
   1  -1   0  749.55   24.26 
  -1  -1   0  734.86   24.26 
  -1  -1   0  750.14   24.41 
   1  -1   0  780.64   24.25 
   1  -1   0  746.20   24.21 
  -1  -1   0  678.86   24.32 
  -1  -1   0  730.03   24.42 
  -1  -1   0  755.79   24.37 
  -1  -1   0  755.65   24.33 
   1  -1   0  756.83   24.22 
   1  -1   0  768.14   24.22 
  -1  -1   0  744.13   24.43 
  -1  -1   0  748.44   24.30 
   1   1   0  753.21   24.27 
   1   1   0  755.44   24.33 
   1   1   0  746.30   24.43 
  -1   1   0  746.73   24.16 
  -1   1   0  751.88   24.29 
  -1   1   0  752.37   24.23 
  -1   1   0  746.76   24.20 
  -1   1   0  756.01   24.36 
   1   1   0  743.37   24.25 
  -1   1   0  738.86   24.23 
   1   1   0  740.97   24.28 
   1   1   0  778.24   24.32 
   1   1   0  733.82   24.26 
   1   1   0  763.28   24.29 
   3  -1   0   95.65    3.20 
   3  -1   0   93.77    3.12 
  -3  -1   0   93.22    3.20 
   3  -1   0   92.45    3.14 
   3  -1   0   95.31    3.08 
   3  -1   0   95.75    3.17 
  -3  -1   0   97.80    3.22 
  -3  -1   0   94.77    3.25 
   3  -1   0   93.74    3.12 
  -3  -1   0   94.83    3.18 
  -3  -1   0   89.87    3.19 
  -3  -1   0   97.05    3.19 
  -3  -1   0   96.29    3.20 
   3  -1   0   93.28    3.17 
   3   1   0   96.82    3.22 
   3   1   0   94.15    3.21 
   3   1   0   95.74    3.21 
   3   1   0   94.13    3.21 
   3   1   0   96.12    3.19 
  -3   1   0   96.50    3.18 
   3   1   0   94.49    3.17 
  -3   1   0   92.27    3.19 
  -3   1   0   90.41    3.05 
  -3   1   0   90.69    3.05 
   3   1   0   93.47    3.20 
  -3   1   0   92.29    3.08 
   3   1   0   95.87    3.24 
   3   1   0   98.94    3.19 
  -3   1   0   91.35    3.14 
  -3   1   0   96.81    3.13 
  -5  -1   0   27.92    1.16 
  -5  -1   0   28.13    1.14 
   5  -1   0   28.86    1.02 
   5  -1   0   27.25    0.98 
   5  -1   0   26.72    0.94 
   5  -1   0   28.31    0.99 
   5  -1   0   29.11    1.13 
  -5  -1   0   27.26    1.14 
  -5  -1   0   27.14    1.14 
  -5  -1   0   27.91    1.12 
   5  -1   0   27.52    1.07 
   5  -1   0   29.08    1.17 
  -5  -1   0   29.07    1.14 
  -5  -1   0   27.47    1.25 
   5  -1   0   27.57    0.95 
   5  -1   0   26.10    1.05 
   5  -1   0   27.14    1.05 
   5  -1   0   28.06    0.98 
  -5  -1   0   27.96    1.13 
   5   1   0   27.49    1.12 
   5   1   0   28.57    1.15 
  -5   1   0   27.75    1.02 
   5   1   0   27.50    1.15 
   5   1   0   26.88    1.15 
  -5   1   0   28.51    1.12 
   5   1   0   27.90    1.16 
   5   1   0   28.39    1.16 
  -5   1   0   27.88    1.18 
  -5   1   0   27.21    1.01 
   5   1   0   30.31    1.25 
  -5   1   0   28.16    1.07 
  -5   1   0   26.55    0.96 
   5   1   0   28.43    1.15 
  -5   1   0   26.64    1.06 
  -5   1   0   26.40    1.07 
  -5   1   0   26.64    0.97 
  -7  -1   0    4.18    0.38 
  -7  -1   0    4.46    0.45 
   7  -1   0    3.81    0.24 
  -7  -1   0    4.30    0.43 
  -7  -1   0    3.68    0.55 
  -7  -1   0    3.82    0.45 
   7  -1   0    4.36    0.26 
  -7  -1   0    3.83    0.33 
   7  -1   0    4.18    0.30 
   7  -1   0    4.35    0.48 
  -7  -1   0    4.81    0.44 
  -7  -1   0    4.25    0.41 
   7  -1   0    3.54    0.27 
   7  -1   0    4.52    0.37 
   7  -1   0    3.47    0.31 
  -7  -1   0    4.33    0.27 
   7  -1   0    4.57    0.42 
   7  -1   0    4.31    0.33 
   7  -1   0    4.03    0.34 
  -7  -1   0    3.66    0.43 
   7  -1   0    4.20    0.42 
   7   1   0    4.24    0.43 
  -7   1   0    3.80    0.30 
  -7   1   0    4.08    0.32 
  -7   1   0    3.76    0.52 
   7   1   0    4.02    0.45 
  -7   1   0    3.44    0.28 
  -7   1   0    3.62    0.35 
  -7   1   0    3.77    0.23 
   7   1   0    4.40    0.47 
  -7   1   0    3.38    0.35 
  -7   1   0    4.04    0.36 
   7   1   0    3.93    0.47 
  -7   1   0    4.25    0.20 
   7   1   0    3.21    0.50 
   7   1   0    4.07    0.45 
   7   1   0    3.66    0.44 
  -7   1   0    3.78    0.39 
   7   1   0    3.66    0.42 
  -9  -1   0  229.48    7.77 
  -9  -1   0  226.90    7.68 
   9  -1   0  229.26    7.58 
   9  -1   0  233.77    7.59 
   9  -1   0  236.79    7.74 
  -9  -1   0  226.55    7.71 
   9  -1   0  231.45    7.60 
  -9  -1   0  230.56    7.66 
   9  -1   0  233.54    7.51 
   9  -1   0  223.94    7.67 
   9  -1   0  231.50    7.63 
  -9  -1   0  229.48    7.62 
  -9  -1   0  229.48    7.51 
  -9  -1   0  224.57    7.96 
   9  -1   0  229.85    7.54 
   9  -1   0  233.84    7.87 
  -9  -1   0  228.67    7.73 
   9  -1   0  221.81    7.57 
  -9  -1   0  233.12    7.75 
   9  -1   0  233.78    7.64 
  -9  -1   0  228.29    7.68 
   9   1   0  234.38    7.74 
  -9   1   0  232.26    7.72 
  -9   1   0  228.98    7.63 
  -9   1   0  238.74    7.51 
  -9   1   0  227.55    7.90 
   9   1   0  233.09    7.75 
  -9   1   0  231.70    7.47 
   9   1   0  230.57    7.79 
  -9   1   0  221.48    7.66 
   9   1   0  229.36    7.77 
   9   1   0  234.37    7.74 
   9   1   0  239.66    7.95 
   9   1   0  234.74    7.77 
   9   1   0  228.21    7.76 
  -9   1   0  227.15    7.65 
  -9   1   0  222.70    7.60 
  -9   1   0  226.45    7.56 
  -9   1   0  232.58    7.54 
  11  -1   0   74.28    2.75 
  11  -1   0   75.05    3.00 
 -11  -1   0   77.11    2.58 
 -11  -1   0   74.40    2.70 
  11  -1   0   76.85    2.64 
  11  -1   0   73.65    2.70 
  11  -1   0   74.38    2.70 
 -11  -1   0   77.69    2.84 
 -11  -1   0   75.74    2.76 
  11  -1   0   75.24    2.71 
 -11  -1   0   77.67    2.91 
  11  -1   0   78.69    2.59 
 -11  -1   0   75.89    2.88 
  11  -1   0   73.83    2.71 
 -11  -1   0   78.31    3.16 
  11  -1   0   75.12    2.69 
  11  -1   0   79.06    2.87 
 -11  -1   0   75.63    2.77 
 -11   1   0   76.00    2.54 
 -11   1   0   74.97    2.75 
  11   1   0   76.99    2.92 
  11   1   0   77.25    2.87 
  11   1   0   76.62    3.08 
  11   1   0   76.40    2.86 
 -11   1   0   72.52    2.66 
  11   1   0   78.38    2.85 
  11   1   0   75.84    2.87 
 -11   1   0   80.47    2.63 
 -11   1   0   72.76    2.77 
 -11   1   0   75.89    2.59 
  11   1   0   76.03    2.88 
  11   1   0   77.14    2.90 
 -11   1   0   75.23    2.73 
 -11   1   0   78.70    2.77 
 -11   1   0   74.32    3.07 
  13  -1   0   77.02    2.95 
  13  -1   0   73.59    2.81 
 -13  -1   0   77.05    2.91 
  13  -1   0   76.44    2.81 
  13  -1   0   80.23    2.78 
 -13  -1   0   72.72    3.25 
 -13  -1   0   74.08    2.96 
 -13  -1   0   76.89    2.61 
 -13  -1   0   80.97    2.99 
 -13  -1   0   77.27    2.80 
 -13  -1   0   74.18    2.85 
  13  -1   0   75.94    2.69 
 -13  -1   0   78.37    2.54 
  13  -1   0   77.84    2.80 
  13  -1   0   73.68    2.62 
  13  -1   0   76.41    3.12 
 -13  -1   0   73.48    2.76 
  13  -1   0   77.95    2.79 
  13  -1   0   76.33    2.80 
 -13   1   0   75.39    2.82 
 -13   1   0   82.26    2.87 
  13   1   0   78.07    3.02 
  13   1   0   75.15    2.96 
  13   1   0   76.13    2.95 
 -13   1   0   74.78    2.85 
  13   1   0   74.56    2.97 
 -13   1   0   74.19    2.80 
 -13   1   0   76.42    3.22 
 -13   1   0   77.90    2.66 
  13   1   0   75.80    2.92 
  13   1   0   73.27    3.17 
 -13   1   0   78.01    2.74 
  13   1   0   79.59    2.96 
  13   1   0   76.98    2.89 
 -13   1   0   75.95    2.57 
  15  -1   0   16.68    0.98 
  15  -1   0   15.40    1.08 
  15  -1   0   16.14    0.99 
  15  -1   0   14.47    1.26 
  15  -1   0   15.39    0.90 
 -15  -1   0   17.64    1.02 
  15  -1   0   16.34    0.74 
 -15  -1   0   16.00    0.72 
  15  -1   0   14.99    0.80 
 -15  -1   0   17.71    1.45 
 -15  -1   0   18.74    1.07 
 -15  -1   0   15.67    0.88 
 -15  -1   0   16.13    1.12 
  15  -1   0   17.08    0.95 
  15  -1   0   13.20    0.93 
 -15  -1   0   17.16    1.12 
 -15   1   0   15.73    1.37 
  15   1   0   16.94    1.14 
 -15   1   0   15.73    0.66 
 -15   1   0   15.24    0.95 
  15   1   0   14.29    1.06 
 -15   1   0   15.52    0.99 
 -15   1   0   16.03    0.96 
  15   1   0   16.61    1.01 
 -15   1   0   16.87    0.80 
 -15   1   0   18.16    1.02 
  15   1   0   17.76    1.14 
  15   1   0   15.13    1.10 
 -15   1   0   18.22    0.89 
  15   1   0   15.00    1.07 
  15   1   0   14.37    1.12 
  17  -1   0   -0.16    0.52 
  17  -1   0    0.43    0.41 
 -17  -1   0    0.54    0.35 
 -17  -1   0    0.24    0.25 
 -17  -1   0   -0.29    0.42 
  17  -1   0    0.11    0.41 
 -17  -1   0   -0.11    0.49 
 -17  -1   0   -0.05    0.63 
  17  -1   0    0.76    0.37 
 -17  -1   0    0.58    0.31 
 -17  -1   0    0.44    0.42 
  17  -1   0    0.33    0.43 
 -17  -1   0    0.31    0.45 
  17  -1   0    0.27    0.45 
 -17   1   0    0.08    0.16 
  17   1   0    0.62    0.51 
  17   1   0   -0.03    0.50 
  17   1   0    0.53    0.53 
 -17   1   0    0.67    0.32 
 -17   1   0    0.31    0.33 
  17   1   0    0.59    0.49 
 -17   1   0    0.42    0.40 
 -17   1   0    0.36    0.42 
 -17   1   0    0.36    0.40 
 -17   1   0    0.38    0.66 
  17   1   0    0.01    0.51 
 -17   1   0    0.05    0.44 
 -19  -1   0    0.70    0.61 
 -19  -1   0    0.19    0.75 
  19  -1   0    0.16    0.45 
 -19  -1   0   -0.08    0.47 
 -19  -1   0   -0.06    0.43 
  19  -1   0    0.15    0.59 
  19  -1   0   -0.15    0.50 
 -19  -1   0    0.24    0.28 
 -19  -1   0    0.19    0.55 
  19  -1   0   -0.40    0.48 
 -19   1   0   -0.43    0.47 
 -19   1   0    0.34    0.46 
 -19   1   0    0.64    0.55 
 -19   1   0   -0.11    0.34 
 -19   1   0    0.24    0.74 
 -19   1   0    0.30    0.35 
  19   1   0   -0.45    0.55 
  19   1   0   -0.16    0.61 
  19   1   0   -0.53    0.45 
  21  -1   0    2.54    0.81 
  21  -1   0    1.55    0.73 
 -21  -1   0    2.08    0.64 
 -21  -1   0    1.64    0.78 
 -21  -1   0    1.90    0.99 
 -21  -1   0    1.66    0.72 
 -21  -1   0    2.44    0.71 
 -21   1   0    2.57    0.72 
 -21   1   0    1.55    0.95 
  21   1   0    3.24    0.93 
 -21   1   0    1.98    0.69 
 -21   1   0    2.36    0.65 
  21   1   0    1.71    0.78 
  21   1   0    3.44    0.93 
 -21   1   0    0.94    0.45 
 -23  -1   0    2.79    0.94 
  23  -1   0    3.17    0.89 
 -23  -1   0    3.81    0.93 
  23  -1   0    3.08    0.98 
 -23  -1   0    4.71    1.08 
 -23  -1   0    3.49    1.26 
 -23   1   0    3.32    0.74 
 -23   1   0    2.37    1.24 
  23   1   0    3.61    1.09 
  23   1   0    3.72    1.06 
 -23   1   0    2.54    0.79 
 -23   1   0    4.51    0.97 
 -23   1   0    3.04    0.88 
 -25  -1   0    1.19    0.79 
 -25  -1   0    0.68    0.90 
  25  -1   0    0.45    0.88 
  25  -1   0    0.74    0.87 
  25   1   0    0.50    1.05 
 -25   1   0    0.32    1.35 
 -25   1   0    1.20    0.54 
 -25   1   0    0.97    0.85 
  25   1   0    3.50    1.24 
   0  -2   0   38.77    1.35 
   0  -2   0   38.16    1.42 
   0  -2   0   39.62    1.43 
   0  -2   0   39.13    1.42 
   0  -2   0   38.75    1.37 
   0  -2   0   39.37    1.44 
   0  -2   0   40.32    1.45 
   0  -2   0   37.82    1.43 
   0  -2   0   39.61    1.44 
   0  -2   0   39.53    1.35 
   0   2   0   38.80    1.43 
   0   2   0   39.28    1.33 
   0   2   0   39.89    1.42 
   0   2   0   39.34    1.43 
   0   2   0   38.93    1.44 
   0   2   0   39.49    1.43 
   0   2   0   39.66    1.35 
   0   2   0   37.32    1.43 
   2  -2   0   26.41    1.05 
   2  -2   0   26.61    0.99 
  -2  -2   0   26.53    1.10 
  -2  -2   0   29.13    1.05 
   2  -2   0   26.25    0.99 
  -2  -2   0   26.56    1.06 
   2  -2   0   27.52    0.99 
   2  -2   0   28.62    0.99 
  -2  -2   0   26.29    1.12 
   2  -2   0   26.96    1.10 
  -2  -2   0   26.92    1.00 
  -2  -2   0   28.13    1.14 
  -2  -2   0   28.17    1.14 
  -2  -2   0   27.95    1.10 
  -2  -2   0   27.07    1.12 
  -2   2   0   25.81    1.10 
  -2   2   0   27.45    0.94 
   2   2   0   27.02    1.12 
   2   2   0   27.30    1.06 
   2   2   0   26.71    1.13 
   2   2   0   27.06    1.05 
  -2   2   0   28.06    1.08 
  -2   2   0   26.41    0.96 
   2   2   0   27.93    1.09 
   2   2   0   26.31    1.11 
  -2   2   0   26.16    0.99 
   2   2   0   26.83    1.12 
  -2   2   0   27.01    1.00 
   4  -2   0  113.55    3.93 
  -4  -2   0  114.94    3.97 
  -4  -2   0  112.53    3.95 
  -4  -2   0  113.16    3.95 
   4  -2   0  110.54    3.71 
  -4  -2   0  113.72    3.90 
   4  -2   0  115.37    3.82 
  -4  -2   0  112.97    3.94 
  -4  -2   0  115.42    3.99 
   4  -2   0  112.44    3.83 
   4  -2   0  113.59    3.83 
   4  -2   0  115.37    3.71 
  -4  -2   0  114.75    3.91 
  -4  -2   0  111.77    3.94 
   4   2   0  117.94    3.97 
   4   2   0  113.67    3.97 
   4   2   0  113.45    3.89 
   4   2   0  113.20    3.94 
   4   2   0  112.30    3.84 
   4   2   0  114.76    3.96 
  -4   2   0  112.92    3.85 
  -4   2   0  117.11    3.73 
  -4   2   0  113.77    3.93 
   4   2   0  115.65    3.90 
   4   2   0  113.82    3.96 
  -4   2   0  115.91    3.72 
   4   2   0  114.96    3.96 
  -4   2   0  114.78    3.83 
  -6  -2   0   -0.08    0.23 
   6  -2   0    0.13    0.14 
   6  -2   0    0.13    0.15 
   6  -2   0   -0.21    0.21 
  -6  -2   0   -0.08    0.24 
   6  -2   0    0.10    0.19 
   6  -2   0   -0.03    0.11 
   6  -2   0   -0.17    0.18 
  -6  -2   0    0.27    0.23 
  -6  -2   0   -0.05    0.22 
  -6  -2   0    0.06    0.24 
  -6  -2   0   -0.04    0.20 
  -6  -2   0    0.72    0.31 
  -6  -2   0    0.25    0.22 
   6  -2   0    0.03    0.16 
   6   2   0   -0.13    0.24 
   6   2   0   -0.08    0.24 
  -6   2   0   -0.01    0.19 
   6   2   0   -0.20    0.26 
   6   2   0   -0.06    0.22 
   6   2   0   -0.15    0.24 
  -6   2   0    0.11    0.22 
  -6   2   0    0.01    0.18 
   6   2   0   -0.14    0.26 
  -6   2   0    0.24    0.07 
   6   2   0   -0.21    0.24 
  -6   2   0    0.38    0.26 
  -6   2   0   -0.01    0.07 
   6   2   0   -0.13    0.22 
  -6   2   0    0.07    0.11 
   6   2   0    0.05    0.17 
   8  -2   0   26.90    1.11 
  -8  -2   0   25.45    1.21 
   8  -2   0   26.21    0.90 
   8  -2   0   25.12    0.98 
   8  -2   0   26.94    1.00 
  -8  -2   0   25.02    1.18 
   8  -2   0   26.87    1.10 
  -8  -2   0   24.97    1.18 
   8  -2   0   23.36    1.07 
  -8  -2   0   26.66    1.38 
  -8  -2   0   24.59    1.24 
  -8  -2   0   27.11    1.22 
   8  -2   0   25.53    1.19 
  -8  -2   0   27.25    1.21 
  -8   2   0   24.59    0.90 
   8   2   0   24.41    1.23 
  -8   2   0   23.66    0.93 
   8   2   0   25.72    1.24 
   8   2   0   25.33    1.24 
  -8   2   0   24.28    1.09 
   8   2   0   27.85    1.22 
   8   2   0   25.39    1.25 
   8   2   0   26.98    1.33 
   8   2   0   26.53    1.23 
  -8   2   0   25.69    1.05 
  -8   2   0   24.95    1.16 
  -8   2   0   25.93    0.98 
   8   2   0   25.15    1.17 
  -8   2   0   23.01    1.21 
  10  -2   0    1.74    0.24 
 -10  -2   0    1.49    0.42 
  10  -2   0    1.57    0.17 
 -10  -2   0    1.84    0.36 
 -10  -2   0    1.76    0.43 
 -10  -2   0    1.47    0.39 
  10  -2   0    1.47    0.39 
  10  -2   0    1.85    0.26 
 -10  -2   0    1.85    0.41 
  10  -2   0    2.33    0.36 
  10  -2   0    1.39    0.36 
 -10  -2   0    1.46    0.50 
  10  -2   0    1.51    0.25 
 -10  -2   0    0.89    0.33 
  10  -2   0    1.51    0.36 
  10   2   0    1.78    0.41 
  10   2   0    1.81    0.46 
 -10   2   0    1.89    0.24 
 -10   2   0    2.02    0.48 
  10   2   0    1.68    0.45 
 -10   2   0    1.54    0.29 
 -10   2   0    1.70    0.31 
 -10   2   0    1.63    0.30 
  10   2   0    2.82    0.61 
 -10   2   0    1.44    0.33 
  10   2   0    1.44    0.39 
  10   2   0    1.43    0.43 
  10   2   0    0.92    0.38 
  10   2   0    1.88    0.49 
  12  -2   0    0.30    0.18 
  12  -2   0    0.58    0.28 
 -12  -2   0    0.39    0.36 
 -12  -2   0   -0.03    0.29 
 -12  -2   0    0.39    0.31 
 -12  -2   0    0.14    0.40 
  12  -2   0    0.27    0.19 
 -12  -2   0   -0.13    0.44 
  12  -2   0    0.14    0.23 
 -12  -2   0    0.66    0.28 
 -12  -2   0    0.05    0.36 
 -12  -2   0    0.45    0.35 
  12  -2   0    0.29    0.27 
  12  -2   0    0.18    0.13 
  12  -2   0    0.34    0.22 
  12  -2   0    0.47    0.40 
 -12  -2   0    0.41    0.21 
  12  -2   0    0.17    0.33 
 -12   2   0    0.28    0.23 
 -12   2   0   -0.07    0.30 
 -12   2   0    0.05    0.25 
  12   2   0    0.35    0.39 
 -12   2   0    0.08    0.26 
  12   2   0    0.43    0.36 
  12   2   0    0.24    0.39 
  12   2   0    0.36    0.42 
  12   2   0    0.89    0.44 
  12   2   0   -0.47    0.39 
 -12   2   0    0.25    0.44 
  12   2   0    0.06    0.42 
  12   2   0    0.04    0.36 
 -12   2   0    0.28    0.18 
 -14  -2   0   20.69    1.18 
 -14  -2   0   17.67    0.96 
  14  -2   0   19.78    1.14 
  14  -2   0   16.00    1.24 
 -14  -2   0   17.93    1.19 
  14  -2   0   17.58    0.97 
 -14  -2   0   20.26    1.26 
  14  -2   0   20.45    0.94 
  14  -2   0   19.58    1.02 
 -14  -2   0   18.94    1.06 
  14  -2   0   18.45    0.81 
 -14  -2   0   18.12    1.05 
  14  -2   0   19.11    0.95 
 -14  -2   0   18.57    0.81 
 -14  -2   0   19.48    1.48 
  14  -2   0   18.03    0.83 
  14  -2   0   19.14    0.76 
  14   2   0   17.35    1.15 
  14   2   0   19.15    1.23 
 -14   2   0   15.97    1.31 
  14   2   0   18.45    1.28 
 -14   2   0   18.92    0.93 
 -14   2   0   17.86    0.92 
 -14   2   0   18.79    0.84 
 -14   2   0   19.45    0.98 
  14   2   0   19.01    1.17 
 -14   2   0   19.91    1.09 
  14   2   0   17.89    1.23 
  14   2   0   18.79    1.22 
  14   2   0   17.76    1.21 
 -16  -2   0   49.95    2.13 
  16  -2   0   49.61    2.05 
 -16  -2   0   52.01    2.32 
  16  -2   0   51.84    1.90 
 -16  -2   0   49.69    2.14 
 -16  -2   0   54.97    2.75 
  16  -2   0   53.89    2.07 
  16  -2   0   49.53    1.85 
 -16  -2   0   50.03    2.24 
 -16  -2   0   49.22    1.84 
  16  -2   0   49.76    2.04 
 -16  -2   0   51.12    2.37 
  16  -2   0   50.33    2.09 
 -16  -2   0   47.18    2.02 
  16  -2   0   52.74    2.23 
  16  -2   0   48.53    2.93 
  16   2   0   53.61    2.43 
  16   2   0   49.19    2.23 
  16   2   0   50.55    2.33 
 -16   2   0   54.73    2.10 
  16   2   0   48.01    2.34 
 -16   2   0   51.12    1.90 
  16   2   0   54.97    2.34 
 -16   2   0   50.14    1.96 
 -16   2   0   49.18    2.02 
 -16   2   0   49.69    2.17 
 -16   2   0   48.83    2.53 
  16   2   0   53.45    2.38 
 -18  -2   0    5.43    1.24 
  18  -2   0    5.38    0.75 
  18  -2   0    6.50    0.78 
  18  -2   0    5.52    0.76 
 -18  -2   0    6.92    0.75 
 -18  -2   0    6.96    0.83 
 -18  -2   0    5.12    1.01 
  18  -2   0    6.21    0.88 
 -18  -2   0    7.23    1.02 
 -18  -2   0    6.74    0.50 
  18  -2   0    4.78    0.73 
  18  -2   0    6.41    0.51 
 -18  -2   0    5.98    0.90 
  18   2   0    4.67    0.93 
  18   2   0    6.39    1.01 
 -18   2   0    6.63    0.87 
  18   2   0    7.70    1.04 
 -18   2   0    6.16    1.20 
  18   2   0    7.19    1.07 
 -18   2   0    6.14    0.57 
 -18   2   0    6.37    0.74 
 -18   2   0    6.70    0.79 
 -18   2   0    6.02    0.64 
  20  -2   0    7.14    1.01 
 -20  -2   0    7.35    1.45 
 -20  -2   0    6.74    1.00 
 -20  -2   0    7.54    1.21 
  20  -2   0    6.79    0.94 
  20  -2   0    6.68    0.89 
  20  -2   0    6.01    1.18 
 -20  -2   0    6.56    0.89 
 -20  -2   0    5.05    1.13 
 -20   2   0    7.38    0.98 
 -20   2   0    6.17    0.88 
  20   2   0    7.31    1.13 
  20   2   0    7.00    1.23 
 -20   2   0    5.71    0.80 
 -20   2   0    6.62    1.32 
 -20   2   0    7.76    0.65 
 -20   2   0    6.76    0.73 
  22  -2   0    3.33    0.84 
 -22  -2   0    2.37    0.90 
 -22  -2   0    3.28    0.88 
 -22  -2   0    1.15    0.95 
  22  -2   0    3.12    0.89 
  22  -2   0    3.06    0.98 
 -22  -2   0    3.22    0.78 
 -22   2   0    2.02    0.63 
 -22   2   0    2.83    1.11 
 -22   2   0    2.61    0.59 
  22   2   0    1.94    0.97 
 -22   2   0    4.40    0.81 
  22   2   0    2.39    1.00 
 -22   2   0    4.62    0.91 
 -24  -2   0    0.08    0.68 
  24  -2   0    0.49    0.87 
  24  -2   0    1.40    0.87 
 -24  -2   0    0.31    0.77 
 -24  -2   0    0.24    0.72 
  24   2   0    0.31    0.89 
  24   2   0    0.78    0.95 
 -24   2   0    0.07    0.39 
 -24   2   0    0.26    0.75 
 -24   2   0    0.18    0.91 
  -1  -3   0  416.28   13.69 
   1  -3   0  420.61   13.63 
   1  -3   0  406.17   13.66 
  -1  -3   0  426.67   13.59 
  -1  -3   0  430.70   13.70 
  -1  -3   0  412.18   13.66 
   1  -3   0  414.25   13.47 
   1  -3   0  408.66   13.53 
  -1  -3   0  413.28   13.56 
  -1  -3   0  418.50   13.60 
  -1  -3   0  414.65   13.65 
   1  -3   0  416.14   13.63 
  -1  -3   0  426.17   13.67 
  -1  -3   0  414.46   13.69 
   1  -3   0  402.87   13.51 
   1  -3   0  402.76   13.60 
   1  -3   0  420.00   13.62 
   1  -3   0  415.16   13.62 
   1  -3   0  429.33   13.66 
   1   3   0  418.82   13.56 
   1   3   0  415.10   13.65 
   1   3   0  424.41   13.68 
  -1   3   0  407.61   13.66 
  -1   3   0  413.23   13.62 
   1   3   0  426.97   13.69 
   1   3   0  415.99   13.58 
  -1   3   0  429.11   13.60 
   1   3   0  415.99   13.55 
   1   3   0  427.56   13.69 
  -1   3   0  408.60   13.62 
  -1   3   0  413.43   13.50 
   1   3   0  417.40   13.69 
  -1   3   0  426.89   13.60 
   1   3   0  418.50   13.63 
  -3  -3   0   56.33    2.14 
  -3  -3   0   58.87    2.15 
   3  -3   0   52.98    2.09 
  -3  -3   0   55.59    2.11 
  -3  -3   0   56.53    2.09 
  -3  -3   0   58.23    2.05 
   3  -3   0   57.23    1.93 
   3  -3   0   53.05    1.93 
   3  -3   0   54.52    2.03 
  -3  -3   0   54.19    2.01 
  -3  -3   0   54.13    2.12 
   3  -3   0   56.39    1.94 
  -3  -3   0   51.17    1.95 
  -3  -3   0   56.13    2.11 
   3  -3   0   57.03    1.95 
   3  -3   0   57.11    1.95 
   3   3   0   56.54    2.14 
  -3   3   0   54.69    2.05 
   3   3   0   54.93    2.12 
  -3   3   0   54.72    1.96 
   3   3   0   53.62    2.05 
  -3   3   0   55.89    1.86 
   3   3   0   55.08    2.01 
  -3   3   0   55.29    2.10 
   3   3   0   54.48    2.12 
  -3   3   0   55.35    1.95 
   3   3   0   56.55    2.10 
   3   3   0   54.05    2.03 
   5  -3   0   54.63    2.04 
   5  -3   0   55.96    1.87 
  -5  -3   0   56.97    2.19 
   5  -3   0   56.38    1.98 
   5  -3   0   52.59    1.89 
  -5  -3   0   57.10    2.19 
   5  -3   0   56.97    1.87 
  -5  -3   0   62.16    2.26 
   5  -3   0   57.62    2.06 
  -5  -3   0   56.05    2.21 
  -5  -3   0   56.91    2.22 
   5  -3   0   54.71    1.92 
  -5  -3   0   56.70    2.12 
  -5  -3   0   58.32    2.21 
  -5  -3   0   56.97    2.15 
   5  -3   0   57.43    1.90 
   5   3   0   58.21    2.22 
   5   3   0   54.43    2.21 
  -5   3   0   54.01    2.08 
   5   3   0   57.54    2.23 
  -5   3   0   57.02    2.17 
   5   3   0   54.90    2.19 
   5   3   0   57.50    2.13 
   5   3   0   57.35    2.05 
   5   3   0   55.63    2.11 
   5   3   0   58.96    2.25 
   5   3   0   54.96    2.18 
  -5   3   0   55.57    1.94 
  -5   3   0   55.48    1.91 
   7  -3   0   29.10    1.02 
   7  -3   0   27.45    1.27 
  -7  -3   0   29.04    1.32 
   7  -3   0   28.14    1.15 
  -7  -3   0   26.88    1.34 
  -7  -3   0   29.22    1.35 
   7  -3   0   28.17    1.13 
   7  -3   0   30.00    1.21 
  -7  -3   0   27.45    1.35 
  -7  -3   0   29.77    1.41 
  -7  -3   0   27.88    1.44 
   7  -3   0   26.74    1.17 
  -7  -3   0   28.67    1.36 
   7   3   0   30.07    1.40 
   7   3   0   28.31    1.38 
  -7   3   0   28.08    0.98 
  -7   3   0   28.80    1.00 
   7   3   0   28.08    1.30 
   7   3   0   28.27    1.29 
   7   3   0   29.31    1.37 
   7   3   0   28.65    1.40 
  -7   3   0   25.54    1.28 
   7   3   0   29.22    1.39 
  -7   3   0   27.23    1.21 
   7   3   0   30.76    1.44 
  -7   3   0   28.72    1.22 
   9  -3   0   73.16    2.64 
   9  -3   0   73.09    2.55 
  -9  -3   0   73.89    2.89 
  -9  -3   0   75.88    2.89 
   9  -3   0   73.77    2.79 
  -9  -3   0   76.65    2.90 
   9  -3   0   75.45    2.80 
   9  -3   0   75.87    2.70 
  -9  -3   0   74.42    3.07 
  -9  -3   0   74.77    2.96 
  -9  -3   0   77.57    2.91 
  -9   3   0   72.55    2.85 
   9   3   0   75.21    2.94 
   9   3   0   77.14    2.95 
   9   3   0   80.52    2.98 
  -9   3   0   74.91    2.84 
  -9   3   0   74.39    2.52 
   9   3   0   77.44    2.86 
   9   3   0   75.00    2.98 
   9   3   0   77.63    2.94 
   9   3   0   77.05    3.02 
  -9   3   0   70.01    2.49 
  -9   3   0   76.16    2.72 
   9   3   0   75.18    2.86 
  11  -3   0   89.21    3.10 
 -11  -3   0   89.62    3.39 
 -11  -3   0   95.84    3.51 
  11  -3   0   86.15    3.06 
  11  -3   0   87.52    3.22 
  11  -3   0   90.27    3.36 
 -11  -3   0   87.47    3.39 
 -11  -3   0   91.94    3.42 
 -11  -3   0   90.63    3.42 
  11  -3   0   89.88    2.97 
  11  -3   0   87.38    3.26 
 -11  -3   0   87.88    3.62 
  11   3   0   87.10    3.35 
 -11   3   0   90.22    3.42 
  11   3   0   90.98    3.52 
 -11   3   0   86.81    3.24 
 -11   3   0   87.08    3.18 
  11   3   0   90.26    3.45 
  11   3   0   86.59    3.42 
 -11   3   0   86.44    2.99 
 -11   3   0   90.73    2.96 
  11   3   0   88.21    3.40 
  11   3   0   93.68    3.50 
 -11   3   0   86.71    3.03 
  11   3   0   94.16    3.49 
  11   3   0   90.25    3.57 
  13  -3   0  126.56    4.36 
 -13  -3   0  123.20    4.52 
 -13  -3   0  124.94    4.84 
  13  -3   0  121.01    4.35 
  13  -3   0  119.48    4.49 
 -13  -3   0  123.27    4.53 
 -13  -3   0  117.48    4.58 
  13  -3   0  117.58    4.16 
 -13  -3   0  115.76    4.29 
 -13  -3   0  126.39    4.47 
  13  -3   0  125.22    4.14 
  13  -3   0  116.06    4.08 
 -13   3   0  119.74    4.58 
 -13   3   0  123.72    4.26 
 -13   3   0  116.24    4.09 
  13   3   0  119.74    4.63 
 -13   3   0  120.89    4.14 
  13   3   0  122.96    4.54 
  13   3   0  130.61    4.64 
  13   3   0  125.04    4.55 
  13   3   0  116.50    4.57 
 -13   3   0  122.38    4.03 
  13   3   0  124.41    4.59 
 -13   3   0  120.93    4.36 
  13   3   0  124.39    4.57 
  15  -3   0   89.19    3.11 
  15  -3   0   88.63    3.11 
 -15  -3   0   91.15    3.91 
  15  -3   0   86.51    3.06 
 -15  -3   0   88.68    3.52 
 -15  -3   0   87.67    3.30 
  15  -3   0   85.16    3.33 
  15  -3   0   88.00    3.28 
  15  -3   0   87.06    3.14 
 -15  -3   0   86.26    3.39 
 -15  -3   0   96.79    3.67 
 -15  -3   0   89.25    3.48 
 -15  -3   0   86.93    3.06 
  15  -3   0   85.42    3.53 
  15   3   0   89.00    3.62 
 -15   3   0   88.20    2.98 
 -15   3   0   90.63    3.13 
 -15   3   0   82.92    3.05 
 -15   3   0   83.75    3.18 
 -15   3   0   88.65    3.34 
  15   3   0   91.78    3.67 
  15   3   0   88.65    3.51 
  15   3   0   84.51    3.49 
  15   3   0   83.70    3.52 
 -15   3   0   87.16    3.64 
  15   3   0   88.48    3.57 
 -17  -3   0   10.89    1.10 
  17  -3   0   12.19    0.84 
 -17  -3   0   10.19    1.45 
 -17  -3   0   12.29    1.24 
  17  -3   0   11.47    0.93 
  17  -3   0   11.67    0.67 
  17  -3   0   11.15    0.81 
 -17  -3   0   11.58    1.16 
 -17  -3   0   13.67    1.00 
 -17  -3   0   12.90    1.01 
  17  -3   0   10.73    0.82 
 -17  -3   0   10.36    0.66 
  17  -3   0   12.83    1.04 
  17   3   0   11.58    1.28 
 -17   3   0   14.09    0.64 
 -17   3   0   11.53    0.87 
 -17   3   0   11.90    0.82 
 -17   3   0   11.39    0.74 
  17   3   0   11.35    1.26 
 -17   3   0   11.10    1.29 
  17   3   0   11.82    1.24 
  17   3   0   12.84    1.15 
  17   3   0   12.50    1.13 
  17   3   0    8.99    1.14 
 -17   3   0   10.47    1.01 
  19  -3   0    7.98    0.90 
 -19  -3   0    7.94    0.72 
 -19  -3   0    8.12    1.44 
  19  -3   0    9.34    0.90 
  19  -3   0    6.47    0.98 
 -19  -3   0   10.29    1.24 
 -19  -3   0    6.75    1.14 
 -19  -3   0    8.83    0.60 
 -19  -3   0    8.58    1.06 
 -19  -3   0    8.78    0.96 
 -19   3   0    8.18    0.84 
 -19   3   0    7.83    0.74 
  19   3   0    7.65    1.14 
  19   3   0    5.43    1.23 
  19   3   0    6.63    1.18 
 -19   3   0    6.59    1.30 
 -19   3   0    8.36    0.56 
 -19   3   0    9.87    1.01 
 -19   3   0    8.62    0.80 
 -21  -3   0    0.46    0.63 
  21  -3   0    0.42    0.56 
 -21  -3   0    0.99    0.95 
  21  -3   0    0.30    0.55 
 -21  -3   0    1.11    0.88 
  21  -3   0    0.95    0.70 
 -21  -3   0    0.62    0.70 
 -21   3   0    0.10    0.64 
  21   3   0   -0.51    0.75 
 -21   3   0    0.09    0.87 
 -21   3   0    0.21    0.54 
 -21   3   0    0.15    0.28 
 -21   3   0    0.48    0.44 
  21   3   0    0.13    0.82 
 -23  -3   0    6.04    1.10 
  23  -3   0    6.35    1.20 
  23  -3   0    7.49    1.25 
 -23  -3   0    5.31    1.30 
 -23  -3   0    7.76    1.40 
 -23  -3   0    8.91    1.77 
 -23   3   0    7.31    1.26 
  23   3   0    8.20    1.53 
 -23   3   0    6.31    0.61 
 -23   3   0    7.53    1.52 
  23   3   0    5.54    1.34 
  25  -3   0    9.97    1.58 
 -25  -3   0   12.35    1.45 
  25  -3   0   11.86    1.73 
 -25   3   0   15.15    2.49 
 -25   3   0   13.32    1.56 
  25   3   0   13.82    1.76 
   0  -4   0  300.12   10.10 
   0  -4   0  303.96   10.13 
   0  -4   0  305.10   10.12 
   0  -4   0  298.37    9.96 
   0  -4   0  305.37   10.09 
   0  -4   0  307.05   10.01 
   0  -4   0  306.91   10.10 
   0  -4   0  314.87   10.12 
   0  -4   0  311.15    9.95 
   0  -4   0  303.78   10.14 
   0   4   0  281.19   10.07 
   0   4   0  304.97    9.95 
   0   4   0  306.03   10.13 
   0   4   0  307.73   10.09 
   0   4   0  304.15   10.07 
   0   4   0  310.23   10.12 
   0   4   0  308.42   10.11 
   0   4   0  303.74    9.91 
  -2  -4   0  363.86   12.03 
   2  -4   0  368.06   11.82 
  -2  -4   0  360.50   12.06 
  -2  -4   0  353.23   11.82 
  -2  -4   0  373.60   12.04 
  -2  -4   0  357.35   11.98 
  -2  -4   0  358.67   12.06 
   2  -4   0  360.18   11.93 
  -2  -4   0  370.52   11.95 
   2  -4   0  356.72   11.95 
  -2  -4   0  362.07   11.90 
   2  -4   0  373.73   11.92 
   2  -4   0  369.61   11.99 
   2  -4   0  370.26   11.95 
   2  -4   0  351.86   11.79 
  -2  -4   0  376.27   12.07 
   2  -4   0  356.40   11.90 
  -2  -4   0  370.66   11.95 
  -2   4   0  367.36   11.87 
   2   4   0  364.10   11.95 
   2   4   0  354.98   12.05 
   2   4   0  369.88   11.90 
  -2   4   0  358.31   11.92 
   2   4   0  350.71   11.90 
  -2   4   0  366.60   11.95 
   2   4   0  370.89   12.02 
   2   4   0  365.13   12.04 
  -2   4   0  349.21   11.86 
   2   4   0  364.68   12.06 
   2   4   0  364.10   12.04 
  -2   4   0  360.01   12.03 
   2   4   0  356.69   11.88 
   4  -4   0    6.38    0.38 
  -4  -4   0    7.75    0.56 
   4  -4   0    8.33    0.40 
  -4  -4   0    9.34    0.71 
   4  -4   0    7.05    0.49 
   4  -4   0    7.50    0.59 
   4  -4   0    8.15    0.48 
  -4  -4   0    9.04    0.68 
  -4  -4   0    8.93    0.77 
  -4  -4   0    7.56    0.67 
  -4  -4   0    8.42    0.74 
   4  -4   0    8.86    0.53 
  -4  -4   0    8.27    0.63 
   4  -4   0    8.79    0.54 
   4  -4   0    8.31    0.47 
  -4  -4   0    7.68    0.52 
  -4  -4   0    7.81    0.66 
   4   4   0    7.70    0.73 
  -4   4   0    7.69    0.64 
  -4   4   0    8.92    0.55 
  -4   4   0    8.00    0.64 
   4   4   0    7.13    0.60 
   4   4   0    8.34    0.58 
   4   4   0    7.67    0.60 
   4   4   0    6.94    0.69 
  -4   4   0    7.17    0.50 
   4   4   0    8.04    0.55 
   4   4   0    8.84    0.75 
   4   4   0    7.63    0.74 
  -4   4   0    7.46    0.36 
   4   4   0    5.31    0.61 
   6  -4   0   33.71    1.16 
   6  -4   0   36.76    1.26 
  -6  -4   0   36.18    1.65 
   6  -4   0   33.27    1.26 
   6  -4   0   34.03    1.17 
  -6  -4   0   33.34    1.60 
  -6  -4   0   34.00    1.61 
   6  -4   0   35.10    1.41 
   6  -4   0   32.68    1.41 
  -6  -4   0   33.83    1.58 
   6  -4   0   32.94    1.26 
  -6  -4   0   33.18    1.55 
  -6  -4   0   32.89    1.58 
  -6  -4   0   34.59    1.52 
   6  -4   0   32.30    1.20 
   6   4   0   33.87    1.55 
  -6   4   0   32.87    1.54 
   6   4   0   31.27    1.56 
   6   4   0   34.53    1.60 
   6   4   0   35.48    1.50 
   6   4   0   32.26    1.61 
   6   4   0   34.29    1.60 
  -6   4   0   32.93    1.28 
  -6   4   0   34.30    1.24 
  -6   4   0   32.04    1.46 
   6   4   0   33.92    1.48 
   6   4   0   35.95    1.63 
   8  -4   0   13.45    0.76 
   8  -4   0   13.82    0.94 
  -8  -4   0   12.12    0.96 
  -8  -4   0   13.62    0.96 
   8  -4   0   14.93    0.60 
  -8  -4   0   15.56    1.03 
   8  -4   0   14.42    0.57 
   8  -4   0   12.41    0.73 
  -8  -4   0   16.13    1.08 
  -8  -4   0   14.91    0.96 
   8  -4   0   14.25    0.71 
  -8  -4   0   14.32    1.09 
   8   4   0   14.06    0.92 
  -8   4   0   13.79    0.95 
   8   4   0   15.46    1.10 
  -8   4   0   14.40    0.86 
   8   4   0   16.45    0.95 
   8   4   0   13.49    1.02 
  -8   4   0   13.30    0.77 
   8   4   0   12.89    1.00 
   8   4   0   15.86    1.07 
  -8   4   0   13.93    0.61 
  -8   4   0   13.20    0.55 
   8   4   0   14.13    1.02 
   8   4   0   14.63    1.00 
  10  -4   0   64.50    2.53 
  10  -4   0   68.82    2.67 
 -10  -4   0   69.46    2.76 
  10  -4   0   63.43    2.45 
  10  -4   0   66.64    2.46 
 -10  -4   0   69.21    2.92 
 -10  -4   0   63.88    2.71 
  10  -4   0   64.96    2.27 
 -10  -4   0   66.95    2.72 
 -10  -4   0   67.92    2.77 
 -10  -4   0   70.81    2.86 
  10   4   0   71.73    2.86 
  10   4   0   67.53    2.79 
  10   4   0   66.56    2.79 
 -10   4   0   65.65    2.72 
  10   4   0   71.44    2.87 
  10   4   0   66.81    2.69 
  10   4   0   71.06    2.83 
 -10   4   0   62.13    2.56 
  10   4   0   67.84    2.69 
  10   4   0   65.22    2.81 
 -10   4   0   68.28    2.57 
 -12  -4   0   46.03    2.11 
 -12  -4   0   45.10    2.10 
  12  -4   0   47.00    1.98 
 -12  -4   0   47.05    2.11 
  12  -4   0   44.04    1.96 
  12  -4   0   42.09    1.75 
  12  -4   0   45.22    1.85 
  12  -4   0   42.61    1.64 
 -12  -4   0   44.19    2.19 
 -12  -4   0   45.41    2.33 
  12   4   0   46.79    2.57 
  12   4   0   48.99    2.20 
  12   4   0   44.11    2.13 
  12   4   0   48.51    2.25 
  12   4   0   45.98    2.20 
  12   4   0   47.42    2.26 
  12   4   0   46.72    2.12 
 -12   4   0   47.85    2.06 
 -12   4   0   47.69    2.11 
 -12   4   0   46.89    1.92 
  14  -4   0   54.63    2.07 
  14  -4   0   62.50    2.42 
 -14  -4   0   57.70    2.89 
 -14  -4   0   58.19    2.67 
  14  -4   0   55.74    2.44 
  14  -4   0   54.81    2.30 
 -14  -4   0   53.98    2.52 
  14  -4   0   57.90    2.15 
  14  -4   0   56.49    2.02 
 -14  -4   0   56.94    2.51 
 -14  -4   0   60.68    2.60 
 -14   4   0   54.59    2.30 
  14   4   0   53.54    2.61 
  14   4   0   57.88    2.70 
  14   4   0   60.31    2.62 
  14   4   0   57.10    2.60 
 -14   4   0   58.47    2.02 
 -14   4   0   58.66    2.57 
  14   4   0   62.79    2.62 
 -16  -4   0   59.12    2.64 
  16  -4   0   53.69    2.12 
  16  -4   0   56.27    2.16 
 -16  -4   0   60.32    2.69 
 -16  -4   0   59.83    2.81 
  16  -4   0   56.68    2.39 
  16  -4   0   52.45    2.53 
 -16  -4   0   57.63    3.05 
  16  -4   0   54.52    2.15 
  16  -4   0   61.20    2.44 
 -16  -4   0   60.32    2.61 
 -16   4   0   59.81    2.39 
  16   4   0   57.81    2.75 
  16   4   0   60.68    2.70 
 -16   4   0   56.02    2.74 
  16   4   0   58.55    2.68 
  16   4   0   61.63    2.72 
 -16   4   0   56.05    2.09 
  16   4   0   61.31    2.89 
  18  -4   0    0.79    0.50 
  18  -4   0    1.06    0.36 
 -18  -4   0    0.16    0.34 
  18  -4   0    0.37    0.56 
  18  -4   0    1.17    0.44 
  18  -4   0    0.55    0.39 
 -18  -4   0    0.55    0.78 
 -18  -4   0    1.18    0.68 
 -18  -4   0    0.78    0.56 
 -18  -4   0    0.84    0.68 
 -18  -4   0    0.70    0.54 
  18   4   0    1.07    0.82 
 -18   4   0    0.27    0.50 
  18   4   0    0.59    0.83 
 -18   4   0    0.20    0.30 
  18   4   0    0.09    0.74 
  18   4   0    0.61    0.75 
 -18   4   0    0.19    0.69 
 -20  -4   0   13.87    1.24 
 -20  -4   0   11.26    1.44 
  20  -4   0   16.10    1.21 
  20  -4   0   12.58    1.06 
 -20  -4   0   14.73    1.80 
  20  -4   0   14.07    1.28 
 -20  -4   0   13.23    1.47 
 -20   4   0    9.39    1.08 
  20   4   0   15.74    1.73 
  20   4   0   12.49    1.42 
 -20   4   0   12.64    1.57 
 -22  -4   0    1.74    1.10 
  22  -4   0    1.56    0.78 
  22  -4   0    2.90    1.12 
 -22  -4   0    2.01    0.93 
 -22  -4   0    2.08    0.75 
 -22  -4   0    2.31    1.12 
  22  -4   0    1.11    0.61 
  22   4   0    2.61    1.05 
  22   4   0    2.78    1.10 
 -22   4   0    1.89    1.21 
 -24  -4   0    6.39    1.49 
  24  -4   0    8.64    1.26 
 -24  -4   0    6.88    1.24 
  24  -4   0    5.72    1.28 
 -24   4   0    6.00    1.59 
  24   4   0    4.57    1.49 
  24   4   0    8.54    1.86 
  -1  -5   0   13.43    0.90 
   1  -5   0   16.11    0.95 
   1  -5   0   15.84    0.92 
  -1  -5   0   16.33    0.80 
   1  -5   0   16.20    0.89 
   1  -5   0   14.54    0.85 
  -1  -5   0   14.44    0.92 
  -1  -5   0   16.53    0.78 
   1  -5   0   16.04    0.90 
   1  -5   0   16.55    0.79 
  -1  -5   0   15.98    1.00 
  -1  -5   0   16.16    0.96 
  -1  -5   0   13.81    0.89 
   1  -5   0   14.32    0.70 
   1  -5   0   15.72    0.90 
  -1  -5   0   14.87    0.83 
  -1  -5   0   15.28    0.90 
   1  -5   0   16.78    0.68 
  -1   5   0   14.75    0.85 
   1   5   0   15.06    0.93 
  -1   5   0   15.25    0.71 
  -1   5   0   13.41    0.92 
   1   5   0   16.13    0.98 
   1   5   0   16.36    0.98 
   1   5   0   15.02    0.77 
  -1   5   0   15.13    0.90 
   1   5   0   14.60    0.91 
   1   5   0   14.58    0.89 
  -1   5   0   16.23    0.85 
   1   5   0   14.96    0.72 
  -1   5   0   14.59    0.92 
   3  -5   0    0.33    0.27 
   3  -5   0    0.63    0.22 
  -3  -5   0    0.39    0.28 
  -3  -5   0    0.14    0.29 
  -3  -5   0    0.78    0.35 
  -3  -5   0    0.45    0.40 
   3  -5   0    0.25    0.32 
   3  -5   0   -0.05    0.24 
  -3  -5   0    0.76    0.24 
  -3  -5   0    0.16    0.31 
   3  -5   0    0.33    0.25 
   3  -5   0    0.40    0.18 
   3  -5   0    0.30    0.32 
  -3  -5   0    0.80    0.33 
   3  -5   0    0.33    0.25 
  -3  -5   0    0.59    0.37 
  -3  -5   0    0.64    0.33 
  -3  -5   0    0.32    0.31 
   3   5   0    0.39    0.31 
  -3   5   0    0.19    0.29 
  -3   5   0    0.74    0.22 
   3   5   0    0.25    0.35 
  -3   5   0    0.49    0.37 
  -3   5   0    0.51    0.28 
   3   5   0    0.31    0.27 
   3   5   0    0.56    0.42 
   3   5   0    0.70    0.40 
   3   5   0    0.14    0.36 
   3   5   0    0.52    0.31 
   5  -5   0    1.54    0.38 
   5  -5   0    1.68    0.42 
  -5  -5   0    1.97    0.49 
   5  -5   0    1.36    0.30 
   5  -5   0    1.69    0.25 
   5  -5   0    1.68    0.33 
  -5  -5   0    1.55    0.50 
  -5  -5   0    2.16    0.56 
  -5  -5   0    1.11    0.40 
  -5  -5   0    2.52    0.57 
  -5  -5   0    2.28    0.50 
   5  -5   0    1.46    0.32 
   5  -5   0    1.86    0.36 
   5  -5   0    1.74    0.27 
  -5  -5   0    2.03    0.44 
  -5  -5   0    2.45    0.42 
  -5   5   0    1.35    0.33 
   5   5   0    1.93    0.50 
   5   5   0    1.55    0.39 
   5   5   0    1.27    0.51 
  -5   5   0    1.40    0.30 
   5   5   0    2.21    0.45 
   5   5   0    1.80    0.50 
  -5   5   0    2.41    0.59 
   5   5   0    2.10    0.47 
   5   5   0    2.16    0.52 
  -5   5   0    1.69    0.38 
   5   5   0    1.73    0.45 
  -7  -5   0   15.60    1.01 
   7  -5   0   15.09    0.67 
   7  -5   0   14.56    0.59 
  -7  -5   0   16.69    1.15 
  -7  -5   0   16.71    1.09 
  -7  -5   0   14.75    1.03 
   7  -5   0   15.72    0.60 
   7  -5   0   14.53    0.63 
   7  -5   0   14.02    0.75 
   7  -5   0   14.72    0.73 
   7  -5   0   15.04    0.88 
  -7  -5   0   15.12    1.07 
   7  -5   0   16.49    0.76 
  -7  -5   0   13.82    1.07 
  -7   5   0   14.97    0.97 
  -7   5   0   14.82    0.70 
   7   5   0   16.82    1.06 
   7   5   0   14.57    1.12 
   7   5   0   16.86    1.15 
  -7   5   0   15.08    0.76 
  -7   5   0   16.71    1.06 
   7   5   0   14.59    0.95 
   7   5   0   16.18    1.12 
   7   5   0   13.90    1.10 
   7   5   0   15.10    0.97 
   9  -5   0    9.43    0.60 
  -9  -5   0    8.67    0.99 
  -9  -5   0    9.23    0.89 
  -9  -5   0    8.07    0.89 
  -9  -5   0    9.55    0.95 
   9  -5   0    9.16    0.69 
   9  -5   0    9.03    0.61 
   9  -5   0    9.53    0.51 
  -9  -5   0   10.23    1.02 
  -9  -5   0    9.48    0.90 
   9  -5   0    9.67    0.52 
   9  -5   0    8.98    0.86 
  -9   5   0    9.60    0.81 
  -9   5   0   10.49    0.93 
  -9   5   0    9.65    0.45 
   9   5   0   10.90    0.87 
   9   5   0    9.87    1.02 
  -9   5   0    9.11    0.53 
   9   5   0    8.31    0.83 
   9   5   0    9.29    0.94 
   9   5   0   11.06    1.02 
   9   5   0    8.96    0.98 
   9   5   0   11.49    1.03 
  11  -5   0    4.23    0.31 
 -11  -5   0    4.46    0.79 
  11  -5   0    3.73    0.69 
  11  -5   0    4.59    0.59 
 -11  -5   0    5.34    0.82 
  11  -5   0    4.43    0.53 
  11  -5   0    4.08    0.51 
 -11  -5   0    5.24    0.86 
 -11  -5   0    2.83    0.66 
 -11  -5   0    5.32    0.97 
  11   5   0    4.10    0.83 
  11   5   0    4.87    0.92 
  11   5   0    4.80    0.89 
 -11   5   0    4.88    0.81 
 -11   5   0    5.51    0.76 
  11   5   0    4.32    0.88 
  11   5   0    5.38    0.72 
  11   5   0    3.29    0.68 
 -13  -5   0    6.11    0.90 
  13  -5   0    4.61    0.70 
  13  -5   0    5.17    0.64 
 -13  -5   0    5.58    0.92 
 -13  -5   0    5.76    0.93 
  13  -5   0    5.88    0.58 
 -13  -5   0    5.42    1.06 
  13  -5   0    6.30    0.77 
 -13  -5   0    6.66    1.04 
 -13   5   0    7.31    0.94 
  13   5   0    5.06    0.99 
 -13   5   0    6.77    0.81 
  13   5   0    5.00    0.86 
  13   5   0    5.63    1.02 
  13   5   0    5.02    0.98 
  13   5   0    5.65    1.10 
 -13   5   0    5.85    0.80 
 -15  -5   0    7.18    1.24 
 -15  -5   0    8.78    1.06 
 -15  -5   0    8.44    1.19 
 -15  -5   0    9.13    1.12 
  15  -5   0    7.97    0.81 
  15  -5   0    8.40    0.90 
  15  -5   0    7.54    0.89 
 -15  -5   0    8.35    1.06 
  15  -5   0    6.93    0.63 
  15   5   0    7.22    1.12 
 -15   5   0    7.64    1.00 
 -15   5   0    6.79    0.92 
  15   5   0    7.87    0.97 
  15   5   0    7.37    1.14 
  15   5   0    8.48    1.28 
  15   5   0    6.94    1.15 
  17  -5   0   11.14    1.17 
 -17  -5   0   19.01    1.51 
 -17  -5   0   15.31    1.37 
 -17  -5   0   15.89    1.71 
  17  -5   0   17.59    1.22 
  17  -5   0   15.06    0.91 
 -17  -5   0   13.96    1.47 
  17  -5   0   13.22    1.11 
 -17   5   0   16.40    1.20 
 -17   5   0   16.71    1.43 
  17   5   0   15.95    1.56 
  17   5   0   14.51    1.44 
  17   5   0   18.65    1.46 
 -19  -5   0   -0.05    0.71 
  19  -5   0    0.69    0.41 
 -19  -5   0    0.71    0.40 
 -19  -5   0   -0.09    0.79 
  19  -5   0    0.39    0.59 
 -19  -5   0    1.11    0.80 
  19  -5   0    0.19    0.54 
 -19  -5   0    0.54    0.59 
  19   5   0    0.52    0.78 
  19   5   0    1.07    0.93 
 -19   5   0    1.28    0.64 
 -19   5   0   -0.22    0.72 
  19   5   0    0.68    0.83 
  21  -5   0    2.50    0.76 
 -21  -5   0    2.64    1.05 
 -21  -5   0    3.11    0.84 
 -21  -5   0    1.46    1.05 
 -21  -5   0    2.18    1.00 
  21  -5   0    3.54    0.93 
  21  -5   0    2.18    0.61 
  21   5   0    3.31    1.16 
 -21   5   0    2.78    1.02 
  21   5   0    2.64    1.03 
  23  -5   0    0.51    0.60 
 -23  -5   0    0.56    0.75 
  23   5   0    0.84    0.99 
  23   5   0    0.13    1.28 
   0  -6   0   33.08    1.53 
   0  -6   0   32.77    1.57 
   0  -6   0   33.34    1.38 
   0  -6   0   30.78    1.48 
   0  -6   0   29.19    1.49 
   0  -6   0   29.04    1.28 
   0  -6   0   32.64    1.27 
   0  -6   0   31.74    1.48 
   0  -6   0   30.25    1.50 
   0   6   0   28.55    1.42 
   0   6   0   32.18    1.52 
   0   6   0   32.39    1.52 
   0   6   0   30.58    1.27 
   0   6   0   30.56    1.52 
   2  -6   0   17.20    1.06 
  -2  -6   0   20.46    1.13 
  -2  -6   0   21.06    1.19 
  -2  -6   0   19.45    1.14 
  -2  -6   0   19.20    1.13 
   2  -6   0   17.02    0.84 
  -2  -6   0   18.83    1.09 
  -2  -6   0   19.73    1.19 
  -2  -6   0   21.64    1.02 
   2  -6   0   18.84    1.01 
  -2  -6   0   19.87    1.05 
  -2  -6   0   19.56    0.87 
  -2  -6   0   18.64    1.21 
   2  -6   0   18.97    0.92 
   2  -6   0   21.29    1.14 
   2  -6   0   18.53    1.04 
   2  -6   0   19.63    1.12 
   2  -6   0   18.61    1.05 
  -2   6   0   20.24    1.08 
   2   6   0   18.71    0.95 
   2   6   0   18.56    0.91 
   2   6   0   19.03    1.16 
  -2   6   0   16.63    1.06 
  -2   6   0   18.83    1.13 
   2   6   0   19.24    1.20 
   2   6   0   17.49    1.16 
  -2   6   0   19.38    0.97 
   2   6   0   16.14    1.09 
   2   6   0   20.23    1.09 
   4  -6   0   16.17    0.74 
  -4  -6   0   16.72    1.09 
   4  -6   0   18.47    1.05 
  -4  -6   0   16.89    1.18 
  -4  -6   0   17.45    1.15 
   4  -6   0   17.48    0.98 
   4  -6   0   17.15    0.79 
   4  -6   0   16.05    0.92 
  -4  -6   0   17.53    1.13 
  -4  -6   0   15.13    1.02 
   4  -6   0   17.00    1.00 
  -4  -6   0   16.03    1.13 
  -4  -6   0   16.60    0.85 
   4  -6   0   16.39    0.88 
  -4  -6   0   15.75    1.03 
   4  -6   0   16.79    0.89 
  -4  -6   0   16.47    1.02 
   4   6   0   18.55    1.20 
   4   6   0   15.80    0.93 
   4   6   0   17.54    0.95 
   4   6   0   17.56    1.14 
  -4   6   0   16.63    1.09 
   4   6   0   16.89    0.96 
  -4   6   0   16.45    0.94 
  -4   6   0   16.54    0.97 
  -4   6   0   15.95    0.76 
   4   6   0   14.57    1.12 
   4   6   0   15.78    1.12 
  -6  -6   0    0.69    0.44 
   6  -6   0    0.63    0.23 
  -6  -6   0    0.75    0.49 
  -6  -6   0    0.45    0.45 
  -6  -6   0    1.01    0.43 
  -6  -6   0    0.46    0.40 
  -6  -6   0    0.46    0.39 
  -6  -6   0    0.47    0.42 
   6  -6   0    0.55    0.20 
   6  -6   0    0.62    0.36 
   6  -6   0    0.51    0.38 
   6  -6   0    0.34    0.30 
  -6  -6   0    1.03    0.35 
   6  -6   0    0.26    0.30 
   6  -6   0    0.25    0.23 
   6  -6   0    0.39    0.19 
   6   6   0    1.03    0.49 
  -6   6   0    0.12    0.46 
   6   6   0    0.21    0.36 
  -6   6   0    0.87    0.30 
   6   6   0    1.08    0.52 
   6   6   0    0.23    0.40 
  -6   6   0    0.36    0.32 
   6   6   0    0.64    0.48 
   6   6   0    0.91    0.36 
   6   6   0    1.17    0.54 
   6   6   0    0.18    0.36 
   8  -6   0   30.57    1.28 
  -8  -6   0   31.80    1.58 
   8  -6   0   27.53    1.22 
  -8  -6   0   28.83    1.67 
  -8  -6   0   28.92    1.65 
   8  -6   0   28.62    1.08 
   8  -6   0   29.08    1.05 
  -8  -6   0   29.32    1.63 
   8  -6   0   26.76    1.38 
  -8  -6   0   29.86    1.68 
   8  -6   0   28.14    1.13 
   8  -6   0   30.15    1.30 
  -8  -6   0   29.21    1.62 
   8   6   0   29.09    1.45 
   8   6   0   29.18    1.53 
   8   6   0   31.25    1.70 
   8   6   0   28.28    1.32 
   8   6   0   27.05    1.68 
  -8   6   0   27.65    1.57 
   8   6   0   30.09    1.70 
  -8   6   0   28.09    1.24 
  -8   6   0   27.86    1.16 
   8   6   0   29.49    1.68 
  10  -6   0   15.68    0.80 
 -10  -6   0   14.90    1.21 
  10  -6   0   14.75    0.76 
  10  -6   0   15.45    0.96 
 -10  -6   0   18.54    1.34 
  10  -6   0   15.78    0.82 
 -10  -6   0   13.95    1.28 
 -10  -6   0   15.25    1.25 
 -10  -6   0   16.13    1.31 
  10  -6   0   15.18    0.83 
  10  -6   0   15.18    0.76 
  10  -6   0   15.78    1.20 
 -10  -6   0   16.08    1.24 
 -10   6   0   15.70    0.67 
 -10   6   0   14.99    1.20 
  10   6   0   16.34    1.14 
  10   6   0   16.80    1.36 
 -10   6   0   14.62    0.75 
  10   6   0   16.95    1.28 
  10   6   0   17.20    1.31 
  10   6   0   13.49    1.29 
  10   6   0   14.57    1.26 
  12  -6   0   12.37    0.82 
 -12  -6   0   13.63    1.26 
 -12  -6   0   11.29    1.16 
  12  -6   0   11.42    0.81 
 -12  -6   0   14.34    1.36 
 -12  -6   0   15.71    1.45 
 -12  -6   0   12.29    1.20 
  12  -6   0   14.06    0.71 
  12  -6   0   13.86    1.15 
  12  -6   0   12.62    0.62 
  12   6   0   10.67    1.30 
  12   6   0   11.44    1.26 
  12   6   0   16.23    1.22 
 -12   6   0   14.40    1.22 
  12   6   0   13.54    1.36 
  12   6   0   13.51    1.31 
 -12   6   0   13.81    1.11 
  14  -6   0    0.63    0.44 
 -14  -6   0    1.54    0.64 
 -14  -6   0    0.63    0.66 
  14  -6   0    1.36    0.58 
 -14  -6   0    2.20    0.74 
  14  -6   0    0.78    0.44 
 -14  -6   0    0.94    0.72 
 -14  -6   0    1.09    0.71 
  14   6   0    0.73    0.67 
  14   6   0    2.11    0.85 
  14   6   0    0.94    0.75 
  14   6   0    1.27    0.70 
  14   6   0    0.95    0.67 
 -14   6   0    1.37    0.63 
 -16  -6   0   41.08    2.43 
  16  -6   0   48.18    2.31 
  16  -6   0   45.34    2.02 
 -16  -6   0   45.47    2.73 
 -16  -6   0   49.23    2.64 
 -16  -6   0   46.93    2.46 
  16   6   0   48.74    2.52 
  16   6   0   50.10    2.45 
  16   6   0   43.21    2.49 
  16   6   0   51.82    2.74 
 -18  -6   0    2.20    0.89 
  18  -6   0    3.03    0.70 
 -18  -6   0    1.93    0.80 
 -18  -6   0    2.05    0.90 
 -18  -6   0    3.25    1.07 
  18  -6   0    3.14    0.89 
  18   6   0    2.29    1.11 
  18   6   0    2.66    0.94 
  18   6   0    3.47    1.01 
 -20  -6   0    0.61    0.95 
  20  -6   0    0.23    0.62 
 -20  -6   0   -0.99    0.74 
 -20  -6   0   -0.33    0.62 
  20   6   0    0.10    0.95 
  20   6   0   -1.46    0.78 
 -22  -6   0    3.28    0.90 
  22   6   0    4.06    1.21 
  22   6   0    4.35    1.45 
  -1  -7   0   77.58    3.31 
  -1  -7   0   85.01    3.14 
  -1  -7   0   86.00    3.06 
   1  -7   0   84.84    3.24 
   1  -7   0   82.46    3.28 
   1  -7   0   82.89    3.20 
  -1  -7   0   86.65    3.27 
   1  -7   0   85.87    3.08 
   1  -7   0   82.39    3.24 
   1  -7   0   80.59    3.00 
  -1  -7   0   80.83    2.94 
   1  -7   0   85.22    3.31 
  -1  -7   0   82.72    3.28 
  -1  -7   0   84.26    3.32 
  -1  -7   0   82.94    3.36 
  -1   7   0   87.35    3.30 
   1   7   0   84.87    2.94 
  -1   7   0   81.50    3.23 
   1   7   0   87.09    3.04 
   1   7   0   81.38    3.25 
  -1   7   0   84.96    3.16 
   1   7   0   82.31    3.22 
  -1   7   0   85.09    3.29 
   1   7   0   84.49    3.26 
   1   7   0   85.79    3.32 
   1   7   0   80.64    3.31 
  -3  -7   0   46.84    1.97 
  -3  -7   0   41.57    2.10 
  -3  -7   0   48.46    2.10 
   3  -7   0   44.16    1.90 
   3  -7   0   45.14    1.77 
  -3  -7   0   46.00    2.11 
  -3  -7   0   44.24    2.12 
  -3  -7   0   48.07    1.95 
   3  -7   0   41.68    1.96 
   3  -7   0   45.53    2.02 
  -3  -7   0   46.32    1.77 
   3  -7   0   44.71    1.95 
   3  -7   0   43.68    1.70 
   3  -7   0   41.37    1.86 
  -3  -7   0   44.90    2.13 
  -3   7   0   44.73    1.98 
   3   7   0   45.28    2.13 
   3   7   0   44.02    2.08 
   3   7   0   42.89    1.95 
  -3   7   0   44.77    1.78 
  -3   7   0   43.68    1.92 
  -3   7   0   45.07    2.10 
   3   7   0   44.85    2.12 
   3   7   0   44.99    1.82 
   3   7   0   46.06    2.12 
   3   7   0   46.55    1.86 
  -5  -7   0   28.19    1.24 
   5  -7   0   25.32    1.37 
   5  -7   0   27.28    1.12 
  -5  -7   0   25.50    1.58 
   5  -7   0   27.33    1.23 
   5  -7   0   27.38    1.33 
  -5  -7   0   30.30    1.50 
   5  -7   0   24.84    1.21 
   5  -7   0   25.45    1.08 
  -5  -7   0   27.71    1.60 
   5  -7   0   25.01    1.34 
  -5  -7   0   24.67    1.49 
  -5  -7   0   24.13    1.53 
  -5  -7   0   27.94    1.46 
  -5   7   0   24.27    1.26 
   5   7   0   27.07    1.34 
   5   7   0   26.58    1.35 
   5   7   0   24.10    1.48 
  -5   7   0   25.11    1.03 
   5   7   0   23.68    1.55 
  -5   7   0   25.37    1.28 
  -5   7   0   26.91    1.34 
  -5   7   0   25.97    1.52 
   5   7   0   30.55    1.66 
   5   7   0   28.70    1.37 
   5   7   0   25.13    1.57 
   7  -7   0    8.70    0.74 
  -7  -7   0    8.56    1.08 
  -7  -7   0    9.55    1.01 
  -7  -7   0    8.16    0.96 
   7  -7   0    7.59    0.48 
  -7  -7   0    8.20    0.99 
   7  -7   0    9.54    0.81 
  -7  -7   0    6.68    0.99 
  -7  -7   0    8.19    0.90 
   7  -7   0    7.91    0.54 
   7  -7   0    7.12    0.48 
   7  -7   0    9.22    0.72 
   7   7   0    5.81    0.80 
   7   7   0    8.67    1.06 
  -7   7   0    9.83    0.99 
  -7   7   0    7.82    0.65 
   7   7   0    8.98    0.78 
   7   7   0    7.37    1.06 
   7   7   0    9.55    0.84 
   7   7   0    6.67    0.99 
   7   7   0    8.00    1.06 
  -7   7   0    8.19    0.73 
  -9  -7   0   27.47    1.74 
   9  -7   0   26.10    1.09 
  -9  -7   0   26.69    1.70 
   9  -7   0   26.04    1.28 
   9  -7   0   25.77    1.23 
  -9  -7   0   24.16    1.71 
  -9  -7   0   30.18    1.64 
  -9  -7   0   27.19    1.71 
   9  -7   0   30.70    1.38 
  -9  -7   0   25.40    1.65 
  -9   7   0   27.83    1.25 
   9   7   0   25.45    1.57 
   9   7   0   27.60    1.35 
   9   7   0   24.47    1.73 
   9   7   0   32.70    1.78 
   9   7   0   26.07    1.77 
  -9   7   0   25.03    1.61 
  -9   7   0   27.05    1.15 
   9   7   0   30.01    1.80 
   9   7   0   27.00    1.51 
  11  -7   0   34.56    1.57 
  11  -7   0   33.74    1.44 
 -11  -7   0   36.47    1.96 
 -11  -7   0   35.68    2.06 
  11  -7   0   34.61    1.46 
 -11  -7   0   36.41    2.01 
  11  -7   0   37.24    2.04 
  11  -7   0   35.75    1.52 
 -11  -7   0   33.88    2.08 
 -11  -7   0   35.21    2.09 
 -11   7   0   35.26    1.96 
 -11   7   0   33.46    1.39 
  11   7   0   36.25    1.87 
  11   7   0   31.23    2.06 
 -11   7   0   36.56    1.30 
  11   7   0   36.70    2.09 
  11   7   0   33.56    1.58 
  11   7   0   35.79    2.09 
  11   7   0   33.25    2.10 
  13  -7   0   46.63    1.88 
 -13  -7   0   42.11    2.54 
  13  -7   0   47.12    2.44 
 -13  -7   0   46.67    2.55 
  13  -7   0   46.22    1.87 
  13  -7   0   45.32    1.86 
 -13  -7   0   47.71    2.39 
 -13  -7   0   44.65    2.53 
  13  -7   0   47.42    1.71 
  13   7   0   46.59    2.83 
  13   7   0   51.09    2.65 
  13   7   0   48.20    2.32 
  13   7   0   41.67    2.62 
 -13   7   0   45.16    2.35 
 -15  -7   0   12.25    1.48 
 -15  -7   0    9.13    1.56 
  15  -7   0   11.08    0.73 
  15  -7   0   13.33    1.31 
 -15  -7   0   10.99    1.35 
  15   7   0   11.88    1.47 
  15   7   0   12.85    1.31 
  15   7   0   12.54    1.57 
 -17  -7   0   12.66    1.70 
  17  -7   0   13.78    1.37 
 -17  -7   0   14.79    1.51 
 -17  -7   0   15.99    1.58 
  17   7   0   14.75    1.77 
  17   7   0   15.70    1.64 
  17   7   0   14.43    1.47 
 -19  -7   0    5.17    1.40 
 -19  -7   0    2.36    1.28 
  19  -7   0    4.56    1.15 
  19   7   0    2.85    1.27 
  19   7   0    2.55    1.03 
 -21  -7   0    4.89    1.02 
  21  -7   0    3.18    0.89 
  21   7   0    1.92    1.15 
  21   7   0    2.18    1.37 
   0  -8   0    3.03    0.72 
   0  -8   0    3.06    0.74 
   0  -8   0    3.40    0.66 
   0  -8   0    2.99    0.75 
   0  -8   0    3.30    0.85 
   0  -8   0    3.10    0.48 
   0  -8   0    2.90    0.74 
   0   8   0    2.87    0.68 
   0   8   0    3.39    0.54 
   0   8   0    2.77    0.64 
   0   8   0    2.11    0.61 
   0   8   0    3.19    0.79 
  -2  -8   0   13.50    1.15 
  -2  -8   0   13.51    0.78 
   2  -8   0   12.99    0.79 
   2  -8   0   12.56    1.16 
  -2  -8   0   12.92    1.15 
   2  -8   0   11.27    0.99 
  -2  -8   0   14.63    0.94 
   2  -8   0   13.21    0.88 
   2  -8   0   11.97    1.08 
  -2  -8   0   13.14    1.21 
  -2  -8   0   13.80    1.01 
  -2  -8   0   13.88    1.11 
   2  -8   0   13.03    1.05 
  -2  -8   0   13.20    1.09 
   2  -8   0   12.13    1.01 
   2   8   0   15.26    1.21 
  -2   8   0   12.54    1.03 
   2   8   0   12.96    1.09 
   2   8   0   13.39    1.19 
  -2   8   0   13.21    0.92 
   2   8   0   13.89    1.11 
   2   8   0   12.28    0.77 
   2   8   0   13.74    0.88 
  -2   8   0   17.31    1.23 
  -2   8   0   12.03    1.11 
   4  -8   0    0.47    0.43 
   4  -8   0    0.39    0.42 
  -4  -8   0   -0.19    0.46 
  -4  -8   0    0.61    0.35 
   4  -8   0    0.39    0.32 
   4  -8   0   -0.22    0.48 
   4  -8   0    0.45    0.28 
  -4  -8   0    0.20    0.47 
  -4  -8   0    0.45    0.47 
  -4  -8   0    0.62    0.51 
  -4  -8   0    0.56    0.44 
   4  -8   0    0.07    0.36 
  -4  -8   0    0.66    0.60 
   4   8   0    0.12    0.52 
   4   8   0   -0.06    0.37 
   4   8   0   -0.37    0.44 
   4   8   0    0.62    0.56 
  -4   8   0    0.61    0.57 
   4   8   0    0.42    0.52 
  -4   8   0    0.78    0.42 
   4   8   0    0.29    0.56 
   4   8   0    0.35    0.46 
  -4   8   0    0.28    0.30 
  -4   8   0    0.29    0.44 
   6  -8   0    3.17    0.78 
  -6  -8   0    3.35    0.83 
   6  -8   0    2.59    0.46 
   6  -8   0    2.93    0.69 
  -6  -8   0    4.17    1.01 
  -6  -8   0    2.82    0.74 
   6  -8   0    2.46    0.53 
  -6  -8   0    2.43    0.65 
  -6  -8   0    3.32    0.77 
   6  -8   0    3.32    0.65 
   6  -8   0    2.25    0.45 
  -6  -8   0    3.68    0.81 
   6   8   0    2.85    0.80 
  -6   8   0    4.26    0.66 
  -6   8   0    4.20    0.89 
   6   8   0    4.33    0.96 
   6   8   0    3.85    0.99 
   6   8   0    3.87    0.77 
  -6   8   0    4.07    0.72 
   6   8   0    2.98    0.71 
   6   8   0    3.68    0.79 
   6   8   0    2.74    0.59 
   8  -8   0    0.41    0.42 
  -8  -8   0    0.23    0.51 
  -8  -8   0   -0.09    0.50 
  -8  -8   0   -0.27    0.50 
   8  -8   0    0.07    0.37 
  -8  -8   0   -0.33    0.52 
  -8  -8   0    0.20    0.55 
   8  -8   0   -0.08    0.45 
  -8  -8   0    0.22    0.63 
   8   8   0   -0.47    0.64 
   8   8   0   -0.01    0.63 
   8   8   0   -0.04    0.49 
  -8   8   0    1.44    0.67 
   8   8   0    0.03    0.56 
   8   8   0    0.58    0.44 
   8   8   0   -0.06    0.53 
  -8   8   0   -0.60    0.32 
  -8   8   0   -0.10    0.37 
   8   8   0    0.71    0.61 
 -10  -8   0    5.24    1.06 
  10  -8   0    4.22    0.72 
  10  -8   0    3.31    0.74 
  10  -8   0    4.39    0.53 
 -10  -8   0    3.44    0.85 
 -10  -8   0    4.35    1.11 
 -10  -8   0    4.38    0.89 
  10   8   0    2.85    0.87 
  10   8   0    3.72    0.70 
  10   8   0    6.40    0.95 
  10   8   0    3.43    0.92 
 -10   8   0    3.80    0.64 
 -10   8   0    4.36    0.92 
 -10   8   0    3.28    0.49 
  10   8   0    4.48    1.14 
 -12  -8   0    1.82    0.84 
  12  -8   0    1.97    0.50 
 -12  -8   0    3.50    0.93 
  12  -8   0    2.56    0.83 
 -12  -8   0    1.63    0.76 
  12  -8   0    2.80    0.60 
  12   8   0    2.17    0.93 
  12   8   0    1.44    0.51 
  12   8   0    3.97    0.99 
 -12   8   0    3.25    0.85 
 -12   8   0    2.45    0.35 
  12   8   0    2.22    0.93 
 -12   8   0    1.59    0.37 
  14  -8   0    6.80    0.75 
 -14  -8   0    6.66    1.38 
  14  -8   0    9.47    1.36 
  14  -8   0    6.79    0.82 
 -14  -8   0    6.74    1.50 
 -14  -8   0    8.27    1.34 
  14   8   0    7.18    1.73 
  14   8   0    6.99    1.36 
 -14   8   0   10.44    1.21 
  14   8   0    6.23    1.15 
 -16  -8   0   13.16    1.71 
 -16  -8   0   12.19    1.54 
 -16  -8   0   14.15    1.59 
  16  -8   0   13.43    1.45 
  16   8   0   14.01    1.90 
  16   8   0   12.70    1.49 
 -18  -8   0   -1.10    1.06 
  18  -8   0   -0.40    0.69 
  18   8   0   -0.49    1.06 
  18   8   0   -0.24    0.94 
  20  -8   0    0.46    0.77 
  20   8   0    0.74    1.09 
  20   8   0   -0.16    1.11 
   1  -9   0   38.16    2.12 
  -1  -9   0   37.64    1.60 
  -1  -9   0   38.94    2.18 
   1  -9   0   40.42    2.00 
  -1  -9   0   41.73    1.91 
  -1  -9   0   39.60    1.69 
   1  -9   0   38.64    1.80 
  -1  -9   0   38.64    2.06 
   1   9   0   38.99    1.72 
  -1   9   0   34.90    2.15 
   1   9   0   36.60    1.99 
  -1   9   0   43.21    2.08 
   1   9   0   40.72    2.11 
  -1   9   0   40.56    2.04 
   1   9   0   41.27    2.13 
  -1   9   0   42.07    2.11 
  -3  -9   0   41.74    1.99 
  -3  -9   0   45.78    2.32 
  -3  -9   0   47.73    2.46 
   3  -9   0   45.95    2.23 
   3  -9   0   46.56    2.08 
  -3  -9   0   40.88    1.80 
   3  -9   0   43.46    1.89 
  -3  -9   0   42.17    2.20 
  -3  -9   0   45.37    2.10 
   3   9   0   44.39    2.31 
  -3   9   0   44.79    2.12 
   3   9   0   42.94    1.84 
   3   9   0   44.27    2.13 
   3   9   0   47.54    2.01 
  -3   9   0   41.99    2.22 
   3   9   0   39.85    2.19 
  -3   9   0   44.24    2.16 
   3   9   0   46.10    2.32 
   5  -9   0    0.44    0.40 
  -5  -9   0   -0.11    0.50 
  -5  -9   0   -0.24    0.64 
  -5  -9   0    0.01    0.39 
   5  -9   0   -0.23    0.52 
  -5  -9   0    0.70    0.56 
   5  -9   0    0.05    0.34 
  -5  -9   0    0.39    0.55 
  -5   9   0    0.30    0.46 
  -5   9   0   -0.12    0.28 
  -5   9   0   -0.43    0.58 
   5   9   0    0.02    0.43 
   5   9   0    0.62    0.67 
   5   9   0    0.34    0.66 
  -5   9   0    0.22    0.47 
   5   9   0   -0.16    0.52 
   5   9   0   -0.28    0.46 
   5   9   0    0.91    0.58 
  -7  -9   0    5.67    0.99 
   7  -9   0    5.22    0.94 
  -7  -9   0    6.59    1.33 
  -7  -9   0    4.67    1.06 
  -7  -9   0    5.78    1.03 
   7   9   0    3.56    0.81 
  -7   9   0    5.67    0.85 
   7   9   0    5.00    1.17 
   7   9   0    4.89    0.88 
   7   9   0    6.22    0.91 
  -7   9   0    4.49    0.73 
   7   9   0    5.62    1.15 
  -7   9   0    5.75    1.07 
  -9  -9   0   26.85    1.82 
   9  -9   0   26.80    1.60 
  -9  -9   0   31.62    1.79 
  -9  -9   0   26.28    1.92 
  -9   9   0   23.76    1.26 
  -9   9   0   26.05    1.39 
  -9   9   0   25.64    1.79 
   9   9   0   23.87    1.88 
   9   9   0   24.86    1.43 
   9   9   0   26.01    2.01 
   9   9   0   26.35    1.67 
 -11  -9   0   19.77    1.56 
  11  -9   0   19.76    1.31 
  11  -9   0   19.08    1.75 
 -11  -9   0   18.93    1.74 
 -11  -9   0   19.37    1.97 
 -11   9   0   17.51    1.59 
 -11   9   0   19.42    0.94 
 -11   9   0   18.02    1.08 
  11   9   0   18.31    1.48 
  11   9   0   17.61    1.81 
 -13  -9   0    9.32    1.48 
 -13  -9   0    6.68    1.28 
 -13  -9   0    7.46    1.52 
  13  -9   0    9.26    1.09 
  13  -9   0    7.59    1.42 
 -13   9   0    7.17    0.61 
  13   9   0    8.51    1.57 
  13   9   0    6.44    1.17 
 -13   9   0    7.37    1.27 
  15  -9   0    6.24    1.33 
 -15  -9   0    6.05    1.47 
  15  -9   0    5.90    0.93 
 -15  -9   0    5.11    1.37 
 -15  -9   0    6.91    1.66 
  15   9   0    1.99    1.61 
  15   9   0    5.78    1.25 
 -17  -9   0    6.90    1.72 
 -17  -9   0    6.45    1.52 
  17  -9   0    7.04    1.37 
  17   9   0    3.16    1.08 
   0 -10   0   74.09    3.46 
   0 -10   0   74.21    3.17 
   0  10   0   82.18    3.35 
   0  10   0   74.07    3.36 
   0  10   0   79.93    3.61 
   2 -10   0   12.02    1.35 
   2 -10   0   12.07    1.02 
  -2 -10   0   11.74    0.95 
  -2 -10   0   14.37    1.56 
  -2 -10   0   10.82    1.11 
  -2  10   0   10.89    1.26 
   2  10   0   10.45    1.21 
  -2  10   0   12.12    1.20 
   2  10   0   13.16    1.01 
  -2  10   0   11.19    1.31 
   2  10   0   12.03    1.34 
   4 -10   0    5.51    1.16 
  -4 -10   0    6.22    1.01 
   4 -10   0    5.57    1.03 
  -4 -10   0    5.20    0.76 
  -4 -10   0    4.16    1.03 
  -4  10   0    4.71    1.12 
  -4  10   0    5.93    0.94 
   4  10   0    6.44    0.89 
   4  10   0    4.63    1.01 
  -4  10   0    5.06    0.99 
   4  10   0    5.04    1.18 
  -6 -10   0    0.60    0.79 
  -6 -10   0    0.92    0.66 
  -6 -10   0    0.42    0.59 
   6 -10   0    0.76    0.71 
   6  10   0    0.46    0.66 
   6  10   0    0.02    0.57 
   6  10   0    0.95    0.79 
  -6  10   0    1.63    0.77 
  -6  10   0    0.89    0.56 
  -6  10   0   -0.14    0.50 
  -8 -10   0    0.71    0.71 
   8 -10   0    1.19    0.71 
  -8 -10   0    2.10    0.83 
  -8 -10   0    1.71    0.92 
  -8  10   0    1.55    0.47 
  -8  10   0    1.19    0.58 
  -8  10   0    1.36    0.82 
   8  10   0    1.23    0.64 
   8  10   0    0.64    0.76 
 -10 -10   0   24.29    2.06 
 -10 -10   0   23.46    1.75 
  10 -10   0   23.95    1.72 
 -10 -10   0   19.67    2.08 
 -10  10   0   19.08    1.74 
  10  10   0   23.53    1.71 
 -10  10   0   21.22    1.34 
  12 -10   0    9.36    1.35 
 -12 -10   0    8.68    1.58 
 -12 -10   0   11.46    1.58 
  12 -10   0   11.23    1.83 
 -12 -10   0    8.05    1.76 
  12  10   0    7.77    1.30 
 -12  10   0    9.71    0.87 
 -12  10   0   10.68    1.47 
  14 -10   0   14.95    1.78 
 -14 -10   0   10.23    1.91 
  14 -10   0    8.71    1.31 
 -14 -10   0   10.88    1.81 
  14  10   0    8.84    1.52 
 -14  10   0   11.50    1.60 
  -1 -11   0    0.01    0.56 
  -1 -11   0    0.31    0.86 
   1 -11   0    0.74    0.83 
  -1  11   0    0.48    0.64 
   1  11   0   -0.09    0.67 
   1  11   0    0.62    0.71 
  -1  11   0   -0.28    0.68 
  -3 -11   0    6.51    1.39 
   3 -11   0    5.37    1.16 
  -3 -11   0    4.63    1.05 
  -3  11   0    6.64    1.15 
   3  11   0    4.77    0.90 
  -3  11   0    6.12    1.11 
   3  11   0    5.38    1.08 
   3  11   0    4.50    1.01 
   5 -11   0    0.63    0.96 
  -5 -11   0    0.47    1.02 
  -5 -11   0    0.38    0.68 
  -5  11   0    0.50    0.80 
  -5  11   0    0.53    0.61 
  -5  11   0    1.23    0.87 
   5  11   0    1.08    0.73 
   5  11   0    1.41    0.84 
   5  11   0    1.10    0.75 
  -7 -11   0   -0.02    0.88 
   7 -11   0    0.17    0.71 
  -7 -11   0   -0.30    0.71 
  -7  11   0    0.55    0.60 
   7  11   0    0.19    0.76 
  -7  11   0   -0.58    0.71 
   9 -11   0    4.31    1.02 
  -9 -11   0    6.02    1.31 
  -9 -11   0    4.88    1.27 
   9  11   0    5.29    1.21 
  -9  11   0    4.21    0.93 
  -9  11   0    3.37    1.13 
 -11 -11   0    2.43    1.19 
 -11 -11   0    3.77    1.34 
  11 -11   0    3.12    0.85 
  11 -11   0    4.21    1.32 
 -11  11   0    3.18    0.79 
  11  11   0    2.47    1.07 
 -11  11   0    3.38    1.15 
   0 -12   0    0.84    0.89 
   0  12   0    1.62    0.86 
   0  12   0    2.34    0.88 
   0  12   0    1.17    0.86 
   2 -12   0    4.77    1.32 
  -2 -12   0    3.32    1.34 
   2  12   0    5.76    1.40 
  -2  12   0    6.40    1.59 
   2  12   0    5.24    1.15 
  -2  12   0    8.06    1.38 
  -4 -12   0    1.78    1.04 
  -4 -12   0    1.01    0.81 
   4 -12   0    1.79    0.98 
  -4  12   0    2.14    1.01 
   4  12   0    1.06    1.15 
  -6 -12   0    1.51    0.97 
  -6 -12   0   -0.32    1.21 
   6 -12   0    1.62    0.91 
  -6  12   0    0.99    0.98 
   6  12   0    0.42    0.83 
 -26   0   1    0.45    0.97 
 -26   0   1    0.47    0.82 
  26   0  -1    0.77    0.95 
 -24   0   1   -0.24    0.65 
  24   0  -1    1.40    0.97 
 -24   0   1   -0.10    0.70 
 -24   0   1    0.06    0.52 
  24   0  -1    0.57    0.95 
 -24   0   1    0.59    1.21 
 -22   0   1   -0.28    0.56 
 -22   0   1    0.13    0.56 
  22   0  -1   -0.37    0.71 
 -22   0   1    0.54    0.65 
 -22   0   1   -0.86    0.91 
  22   0  -1   -0.49    0.69 
 -22   0   1   -0.06    0.47 
  20   0  -1   -0.41    0.54 
 -20   0   1   -0.14    0.70 
 -20   0   1   -0.21    0.55 
 -20   0   1   -0.47    0.38 
  20   0  -1   -0.79    0.61 
 -20   0   1    0.30    0.52 
 -20   0   1   -0.02    0.32 
  20   0  -1   -0.04    0.45 
 -20   0   1   -0.32    0.52 
  18   0  -1   -0.09    0.41 
  18   0  -1    0.10    0.49 
 -18   0   1   -0.63    0.32 
 -18   0   1   -0.67    0.41 
 -18   0   1   -0.25    0.23 
 -18   0   1    0.03    0.24 
  18   0  -1    0.10    0.58 
 -18   0   1   -0.03    0.48 
 -18   0   1    0.55    0.69 
  18   0  -1   -0.20    0.48 
 -18   0   1    0.16    0.44 
  18   0  -1    0.29    0.50 
 -18   0   1    0.06    0.38 
 -16   0   1    0.24    0.23 
 -16   0   1    0.12    0.30 
  16   0  -1    0.45    0.33 
  16   0  -1   -0.39    0.41 
 -16   0   1   -0.23    0.39 
  16   0  -1    0.50    0.43 
 -16   0   1   -0.32    0.54 
 -16   0   1    0.17    0.22 
  16   0  -1    0.07    0.49 
  16   0  -1   -0.03    0.41 
  16   0  -1   -0.34    0.33 
 -16   0   1    0.08    0.37 
 -16   0   1    0.01    0.34 
  16   0  -1   -0.11    0.40 
 -16   0   1   -0.07    0.36 
  14   0  -1   -0.18    0.34 
 -14   0   1    0.57    0.36 
 -14   0   1    0.47    0.50 
 -14   0   1   -0.31    0.33 
  14   0  -1    0.24    0.29 
 -14   0   1   -0.08    0.32 
  14   0  -1   -0.19    0.29 
  14   0  -1    0.26    0.35 
 -14   0   1    0.27    0.18 
 -14   0   1    0.07    0.30 
  14   0  -1    0.03    0.46 
  14   0  -1   -0.48    0.37 
  14   0  -1    0.18    0.43 
 -14   0   1    0.15    0.21 
 -14   0   1    0.32    0.26 
  14   0  -1   -0.09    0.35 
  12   0  -1   -0.31    0.36 
 -12   0   1   -0.09    0.29 
  12   0  -1    0.07    0.25 
  12   0  -1    0.07    0.30 
  12   0  -1    0.19    0.32 
  12   0  -1    0.22    0.23 
 -12   0   1    0.00    0.29 
 -12   0   1   -0.15    0.28 
 -12   0   1    0.02    0.20 
 -12   0   1    0.07    0.20 
 -12   0   1   -0.02    0.27 
 -12   0   1    0.07    0.38 
  12   0  -1   -0.39    0.28 
  12   0  -1    0.55    0.38 
  12   0  -1   -0.31    0.25 
 -12   0   1    0.01    0.15 
  12   0  -1    0.45    0.30 
 -10   0   1   -0.13    0.23 
  10   0  -1    0.06    0.24 
  10   0  -1   -0.26    0.25 
 -10   0   1    0.21    0.25 
 -10   0   1   -0.33    0.33 
 -10   0   1   -0.15    0.27 
 -10   0   1   -0.03    0.17 
 -10   0   1   -0.10    0.21 
  10   0  -1    0.10    0.22 
  10   0  -1   -0.23    0.18 
  10   0  -1    0.18    0.25 
 -10   0   1   -0.38    0.23 
 -10   0   1   -0.10    0.19 
  10   0  -1    0.09    0.33 
  10   0  -1    0.07    0.29 
  10   0  -1   -0.23    0.26 
 -10   0   1   -0.01    0.13 
  10   0  -1    0.15    0.30 
  10   0  -1   -0.01    0.24 
   8   0  -1   -0.26    0.25 
  -8   0   1   -0.11    0.19 
  -8   0   1    0.02    0.19 
  -8   0   1    0.07    0.19 
   8   0  -1   -0.02    0.14 
  -8   0   1   -0.05    0.15 
  -8   0   1    0.00    0.13 
   8   0  -1   -0.26    0.19 
   8   0  -1    0.12    0.22 
   8   0  -1    0.19    0.19 
  -8   0   1    0.11    0.23 
  -8   0   1   -0.05    0.28 
   8   0  -1   -0.24    0.21 
  -8   0   1    0.12    0.24 
   8   0  -1   -0.09    0.24 
   8   0  -1    0.16    0.21 
   8   0  -1   -0.28    0.17 
  -8   0   1   -0.10    0.15 
   8   0  -1   -0.08    0.18 
  -8   0   1   -0.21    0.09 
   6   0  -1   -0.04    0.17 
   6   0  -1   -0.10    0.08 
   6   0  -1    0.14    0.16 
   6   0  -1   -0.21    0.17 
  -6   0   1    0.09    0.16 
  -6   0   1    0.30    0.26 
   6   0  -1    0.06    0.17 
  -6   0   1    0.04    0.11 
  -6   0   1   -0.07    0.08 
   6   0  -1    0.28    0.24 
   6   0  -1   -0.02    0.19 
  -6   0   1    0.12    0.22 
   6   0  -1    0.08    0.18 
  -6   0   1    0.13    0.22 
   6   0  -1   -0.01    0.18 
  -6   0   1    0.12    0.17 
  -6   0   1   -0.03    0.14 
   6   0  -1    0.00    0.25 
  -6   0   1    0.06    0.18 
  -6   0   1   -0.07    0.14 
  -6   0   1    0.02    0.17 
   6   0  -1   -0.06    0.11 
  -4   0   1    0.06    0.13 
   4   0  -1   -0.13    0.12 
   4   0  -1    0.04    0.05 
  -4   0   1    0.05    0.05 
  -4   0   1   -0.17    0.16 
   4   0  -1   -0.09    0.17 
   4   0  -1    0.01    0.12 
   4   0  -1   -0.03    0.08 
   4   0  -1    0.09    0.13 
   4   0  -1    0.02    0.15 
   4   0  -1    0.03    0.13 
  -4   0   1   -0.17    0.12 
   4   0  -1    0.08    0.13 
  -4   0   1   -0.07    0.10 
  -4   0   1    0.01    0.11 
  -4   0   1    0.09    0.20 
   4   0  -1    0.02    0.19 
  -4   0   1    0.05    0.10 
  -4   0   1    0.06    0.13 
   4   0  -1   -0.07    0.13 
  -4   0   1   -0.09    0.13 
  -4   0   1    0.05    0.08 
  -4   0   1    0.11    0.15 
  -2   0   1    0.04    0.07 
   2   0  -1    0.01    0.03 
  -2   0   1   -0.04    0.08 
  -2   0   1    0.04    0.03 
   2   0  -1    0.10    0.06 
  -2   0   1    0.05    0.06 
   2   0  -1    0.00    0.06 
   2   0  -1   -0.01    0.06 
  -2   0   1   -0.02    0.06 
  -2   0   1    0.07    0.06 
   2   0  -1    0.07    0.06 
  -2   0   1    0.10    0.07 
   2   0  -1    0.03    0.06 
   2   0  -1    0.02    0.08 
  -2   0   1    0.02    0.05 
  -2   0   1    0.15    0.07 
   2   0  -1    0.01    0.06 
   2   0  -1    0.18    0.10 
   2   0  -1   -0.03    0.06 
   2   0   1    0.02    0.08 
  -2   0  -1   -0.02    0.07 
   2   0   1   -0.03    0.07 
   2   0   1    0.06    0.07 
  -2   0  -1   -0.02    0.08 
  -2   0  -1    0.01    0.08 
   2   0   1    0.16    0.07 
   2   0   1    0.12    0.07 
   2   0   1    0.01    0.06 
  -2   0  -1    0.03    0.06 
  -2   0  -1    0.07    0.06 
   2   0   1    0.01    0.07 
  -2   0  -1   -0.01    0.07 
  -2   0  -1   -0.01    0.02 
  -2   0  -1   -0.01    0.11 
   2   0   1    0.03    0.10 
   2   0   1    0.09    0.06 
   2   0   1   -0.01    0.08 
  -2   0  -1   -0.07    0.07 
  -4   0  -1   -0.10    0.17 
   4   0   1   -0.14    0.17 
   4   0   1   -0.02    0.16 
  -4   0  -1    0.04    0.11 
  -4   0  -1   -0.28    0.17 
  -4   0  -1   -0.05    0.15 
   4   0   1    0.07    0.15 
   4   0   1    0.02    0.16 
  -4   0  -1    0.29    0.24 
  -4   0  -1    0.18    0.15 
   4   0   1    0.09    0.15 
  -4   0  -1   -0.15    0.15 
   4   0   1    0.00    0.14 
  -4   0  -1    0.05    0.14 
   4   0   1    0.03    0.13 
   4   0   1   -0.09    0.16 
   4   0   1   -0.13    0.20 
   4   0   1   -0.01    0.11 
  -4   0  -1    0.05    0.03 
  -4   0  -1   -0.04    0.13 
  -6   0  -1    0.00    0.16 
   6   0   1   -0.22    0.19 
  -6   0  -1   -0.02    0.17 
  -6   0  -1    0.05    0.20 
   6   0   1   -0.26    0.17 
   6   0   1   -0.18    0.11 
  -6   0  -1   -0.22    0.15 
   6   0   1   -0.19    0.22 
  -6   0  -1    0.00    0.20 
   6   0   1    0.04    0.17 
   6   0   1    0.09    0.19 
  -6   0  -1    0.00    0.04 
  -6   0  -1   -0.10    0.15 
  -6   0  -1   -0.24    0.24 
   6   0   1    0.06    0.16 
   6   0   1   -0.08    0.19 
  -6   0  -1    0.15    0.14 
   6   0   1   -0.04    0.16 
   6   0   1    0.14    0.17 
  -6   0  -1   -0.08    0.11 
   6   0   1   -0.29    0.13 
  -8   0  -1   -0.07    0.19 
  -8   0  -1    0.21    0.17 
   8   0   1   -0.07    0.20 
   8   0   1   -0.08    0.18 
  -8   0  -1   -0.15    0.23 
   8   0   1    0.33    0.20 
   8   0   1    0.19    0.13 
   8   0   1    0.11    0.29 
  -8   0  -1   -0.03    0.20 
  -8   0  -1   -0.27    0.23 
  -8   0  -1    0.13    0.19 
  -8   0  -1   -0.05    0.31 
   8   0   1   -0.11    0.24 
   8   0   1    0.09    0.22 
  -8   0  -1   -0.06    0.11 
  -8   0  -1   -0.19    0.18 
  -8   0  -1   -0.05    0.13 
   8   0   1   -0.25    0.19 
   8   0   1   -0.07    0.21 
   8   0   1   -0.20    0.20 
   8   0   1    0.06    0.19 
  10   0   1   -0.10    0.23 
 -10   0  -1   -0.07    0.18 
 -10   0  -1   -0.37    0.27 
  10   0   1   -0.02    0.24 
 -10   0  -1   -0.08    0.16 
  10   0   1    0.31    0.29 
  10   0   1    0.02    0.30 
  10   0   1    0.01    0.17 
  10   0   1   -0.14    0.21 
 -10   0  -1    0.26    0.27 
 -10   0  -1    0.10    0.23 
  10   0   1    0.09    0.25 
 -10   0  -1   -0.30    0.33 
  10   0   1   -0.12    0.24 
  10   0   1   -0.41    0.25 
 -10   0  -1   -0.35    0.21 
  10   0   1   -0.41    0.32 
 -10   0  -1    0.09    0.17 
 -10   0  -1    0.31    0.25 
 -12   0  -1   -0.12    0.26 
  12   0   1   -0.21    0.35 
 -12   0  -1    0.22    0.19 
 -12   0  -1    0.01    0.29 
  12   0   1    0.38    0.31 
 -12   0  -1    0.30    0.20 
 -12   0  -1    0.08    0.34 
 -12   0  -1    0.10    0.44 
  12   0   1    0.02    0.32 
  12   0   1   -0.51    0.38 
  12   0   1    0.02    0.30 
 -12   0  -1   -0.05    0.23 
 -12   0  -1    0.04    0.29 
  12   0   1    0.23    0.28 
  12   0   1   -0.07    0.25 
  12   0   1   -0.28    0.29 
  12   0   1   -0.10    0.30 
 -14   0  -1    0.33    0.22 
 -14   0  -1   -0.07    0.27 
  14   0   1   -0.02    0.34 
  14   0   1    0.09    0.33 
  14   0   1    0.02    0.28 
  14   0   1   -0.11    0.33 
 -14   0  -1    0.05    0.22 
 -14   0  -1   -0.28    0.37 
  14   0   1    0.08    0.34 
  14   0   1    0.53    0.49 
  14   0   1   -0.41    0.37 
 -14   0  -1   -0.02    0.29 
  14   0   1    0.35    0.36 
 -14   0  -1    0.28    0.35 
 -14   0  -1   -0.31    0.48 
 -14   0  -1    0.00    0.32 
  16   0   1   -0.11    0.41 
 -16   0  -1   -0.62    0.41 
 -16   0  -1    0.11    0.25 
 -16   0  -1    0.50    0.63 
 -16   0  -1   -0.18    0.37 
 -16   0  -1    0.02    0.34 
  16   0   1    0.06    0.51 
  16   0   1    0.18    0.38 
 -16   0  -1    0.16    0.24 
 -16   0  -1   -0.05    0.34 
 -16   0  -1   -0.19    0.37 
  16   0   1    0.42    0.45 
  16   0   1   -0.06    0.43 
 -18   0  -1   -0.19    0.29 
  18   0   1   -0.12    0.44 
 -18   0  -1    0.48    0.55 
 -18   0  -1   -0.35    0.44 
  18   0   1    0.22    0.50 
  18   0   1    0.17    0.57 
 -18   0  -1   -0.19    0.45 
 -18   0  -1   -0.77    0.65 
 -18   0  -1    0.05    0.40 
 -20   0  -1   -0.12    0.42 
 -20   0  -1   -0.28    0.54 
 -20   0  -1   -0.42    0.79 
  20   0   1    0.02    0.64 
  20   0   1    0.03    0.62 
 -20   0  -1    0.06    0.34 
  20   0   1   -0.35    0.51 
 -20   0  -1   -0.35    0.50 
 -20   0  -1   -1.03    0.46 
 -22   0  -1   -0.08    0.49 
 -22   0  -1    0.51    0.89 
 -22   0  -1    0.03    0.69 
  22   0   1    0.86    0.76 
  22   0   1   -0.45    0.73 
 -22   0  -1   -0.12    0.60 
 -22   0  -1   -0.27    0.58 
 -24   0  -1    1.30    0.83 
 -24   0  -1    0.25    0.77 
  24   0   1    0.38    0.90 
 -24   0  -1    0.68    1.04 
  25  -1  -1    6.57    1.33 
 -25  -1   1    3.76    0.98 
  25  -1  -1    4.48    1.26 
 -25  -1   1    6.34    1.27 
 -25   1   1    6.11    0.88 
 -25   1   1    6.86    1.49 
  25   1  -1    4.97    1.19 
 -25   1   1    5.17    1.77 
  25   1  -1    4.61    1.29 
 -25   1   1    3.05    0.90 
  23  -1  -1    6.04    1.32 
 -23  -1   1    4.73    0.93 
 -23  -1   1    3.56    0.88 
 -23  -1   1    2.95    1.17 
  23  -1  -1    3.60    0.99 
 -23  -1   1    5.39    1.26 
 -23   1   1    4.58    0.76 
 -23   1   1    4.96    0.98 
  23   1  -1    3.68    1.09 
 -23   1   1    4.33    0.99 
 -23   1   1    5.12    1.08 
 -23   1   1    3.15    1.39 
  23   1  -1    3.96    1.06 
  21  -1  -1    3.84    0.95 
  21  -1  -1    3.89    0.91 
 -21  -1   1    3.34    1.10 
 -21  -1   1    3.57    0.87 
 -21  -1   1    4.25    0.80 
 -21  -1   1    2.90    0.68 
 -21  -1   1    3.92    0.84 
 -21   1   1    4.47    1.18 
  21   1  -1    2.46    0.84 
 -21   1   1    3.60    0.69 
 -21   1   1    2.92    0.74 
 -21   1   1    3.98    0.83 
 -21   1   1    2.84    0.75 
  21   1  -1    3.49    0.74 
  21   1  -1    4.77    1.08 
  19  -1  -1    0.39    0.52 
  19  -1  -1    1.13    0.47 
 -19  -1   1    0.40    0.53 
 -19  -1   1    0.78    0.52 
  19  -1  -1    0.92    0.65 
 -19  -1   1    0.71    0.73 
 -19  -1   1    0.36    0.26 
 -19  -1   1    0.62    0.60 
 -19  -1   1    1.20    0.52 
  19  -1  -1    0.15    0.53 
  19   1  -1    0.78    0.51 
 -19   1   1    1.03    0.76 
 -19   1   1    0.84    0.53 
 -19   1   1    0.84    0.46 
 -19   1   1    0.92    0.54 
 -19   1   1    0.81    0.33 
 -19   1   1    0.78    0.39 
  19   1  -1    0.51    0.64 
  19   1  -1    0.18    0.61 
  19   1  -1    0.28    0.60 
 -17  -1   1   19.75    1.35 
  17  -1  -1   21.83    1.36 
 -17  -1   1   19.36    1.22 
 -17  -1   1   22.95    1.28 
 -17  -1   1   18.99    1.05 
  17  -1  -1   19.46    1.17 
  17  -1  -1   17.08    1.17 
  17  -1  -1   20.37    1.14 
  17  -1  -1   21.05    1.22 
 -17  -1   1   23.19    1.08 
 -17  -1   1   23.01    0.89 
 -17  -1   1   21.24    1.38 
  17  -1  -1   19.59    1.07 
 -17  -1   1   21.50    1.72 
  17  -1  -1   21.82    1.24 
 -17   1   1   23.12    1.71 
 -17   1   1   24.62    1.28 
 -17   1   1   22.88    1.28 
 -17   1   1   21.87    0.81 
  17   1  -1   22.65    1.35 
 -17   1   1   21.50    0.96 
  17   1  -1   20.25    1.40 
 -17   1   1   21.93    1.22 
  17   1  -1   20.62    1.36 
  17   1  -1   22.30    1.32 
 -17   1   1   22.65    1.10 
 -17   1   1   20.08    1.15 
  17   1  -1   20.27    1.39 
  15  -1  -1   53.73    2.27 
  15  -1  -1   50.47    1.93 
  15  -1  -1   51.86    2.47 
  15  -1  -1   51.01    2.04 
  15  -1  -1   52.64    2.09 
 -15  -1   1   51.96    2.26 
  15  -1  -1   48.57    1.84 
 -15  -1   1   52.25    2.00 
 -15  -1   1   52.84    1.83 
 -15  -1   1   49.68    2.58 
  15  -1  -1   52.75    2.11 
  15  -1  -1   52.66    2.02 
 -15  -1   1   55.29    2.29 
  15  -1  -1   50.63    2.10 
  15  -1  -1   51.26    2.12 
 -15  -1   1   56.51    2.18 
 -15  -1   1   52.82    2.18 
  15   1  -1   53.20    2.23 
  15   1  -1   52.15    2.24 
 -15   1   1   50.98    2.52 
  15   1  -1   54.08    2.18 
 -15   1   1   50.82    2.09 
  15   1  -1   50.23    2.25 
 -15   1   1   52.85    2.15 
  15   1  -1   53.98    2.30 
 -15   1   1   56.24    2.16 
 -15   1   1   52.02    1.79 
  15   1  -1   52.01    2.23 
 -15   1   1   51.77    1.89 
 -15   1   1   55.12    2.01 
  15   1  -1   51.68    2.31 
 -15   1   1   49.21    2.06 
  13  -1  -1   32.47    1.33 
 -13  -1   1   32.16    1.54 
  13  -1  -1   32.69    1.38 
  13  -1  -1   29.60    1.35 
  13  -1  -1   26.51    1.60 
  13  -1  -1   32.99    1.31 
  13  -1  -1   33.08    1.26 
  13  -1  -1   31.28    1.16 
 -13  -1   1   32.03    1.37 
 -13  -1   1   31.29    1.47 
 -13  -1   1   30.16    1.28 
 -13  -1   1   35.40    1.45 
  13  -1  -1   33.10    1.38 
 -13  -1   1   32.10    1.10 
 -13  -1   1   32.11    1.15 
 -13  -1   1   33.15    1.82 
  13  -1  -1   34.24    1.55 
  13  -1  -1   34.49    1.42 
 -13  -1   1   31.69    1.52 
  13   1  -1   30.18    1.47 
  13   1  -1   32.21    1.47 
 -13   1   1   29.73    1.29 
 -13   1   1   32.63    1.22 
  13   1  -1   31.60    1.55 
 -13   1   1   32.24    1.37 
  13   1  -1   30.51    1.55 
  13   1  -1   30.66    1.52 
 -13   1   1   29.73    1.34 
  13   1  -1   31.43    1.50 
 -13   1   1   33.42    1.42 
 -13   1   1   29.70    1.41 
  13   1  -1   30.94    1.51 
 -13   1   1   28.30    1.70 
 -13   1   1   32.00    1.13 
  13   1  -1   29.05    1.69 
  11  -1  -1    0.39    0.23 
 -11  -1   1    0.29    0.31 
 -11  -1   1    0.77    0.46 
 -11  -1   1    0.63    0.21 
  11  -1  -1    0.26    0.32 
  11  -1  -1    0.54    0.38 
 -11  -1   1    0.54    0.31 
 -11  -1   1    0.55    0.16 
  11  -1  -1    0.43    0.20 
  11  -1  -1    0.67    0.16 
 -11  -1   1    0.34    0.25 
 -11  -1   1    0.11    0.25 
  11  -1  -1    0.41    0.26 
 -11  -1   1    0.63    0.17 
  11  -1  -1    0.39    0.27 
 -11  -1   1    0.56    0.36 
  11  -1  -1    0.78    0.24 
 -11  -1   1    0.28    0.27 
  11  -1  -1    0.40    0.27 
  11  -1  -1    0.76    0.27 
  11   1  -1    0.45    0.35 
 -11   1   1    0.28    0.14 
 -11   1   1    0.42    0.29 
  11   1  -1    0.51    0.38 
 -11   1   1    0.65    0.21 
  11   1  -1    0.72    0.36 
  11   1  -1    0.14    0.30 
 -11   1   1    0.57    0.13 
  11   1  -1    0.48    0.26 
 -11   1   1    0.78    0.27 
 -11   1   1    0.76    0.30 
  11   1  -1    0.70    0.32 
 -11   1   1    0.73    0.27 
  11   1  -1    0.94    0.39 
  11   1  -1    0.95    0.42 
 -11   1   1    0.34    0.38 
 -11   1   1    0.84    0.25 
  11   1  -1    0.82    0.36 
   9  -1  -1    3.98    0.30 
  -9  -1   1    4.65    0.46 
  -9  -1   1    4.56    0.52 
  -9  -1   1    2.99    0.43 
   9  -1  -1    3.36    0.38 
  -9  -1   1    4.90    0.53 
  -9  -1   1    4.37    0.44 
   9  -1  -1    4.43    0.42 
   9  -1  -1    3.83    0.47 
   9  -1  -1    3.98    0.36 
   9  -1  -1    4.65    0.36 
   9  -1  -1    4.20    0.26 
   9  -1  -1    4.43    0.35 
  -9  -1   1    3.03    0.41 
  -9  -1   1    4.18    0.66 
   9  -1  -1    3.30    0.54 
  -9  -1   1    3.50    0.51 
  -9  -1   1    4.26    0.27 
  -9  -1   1    4.64    0.36 
   9  -1  -1    3.83    0.36 
   9  -1  -1    4.65    0.41 
   9   1  -1    3.95    0.54 
   9   1  -1    4.54    0.64 
  -9   1   1    3.35    0.35 
  -9   1   1    4.02    0.21 
  -9   1   1    3.30    0.46 
   9   1  -1    4.12    0.51 
  -9   1   1    3.93    0.32 
   9   1  -1    3.97    0.49 
  -9   1   1    3.78    0.41 
   9   1  -1    3.69    0.52 
  -9   1   1    3.39    0.42 
   9   1  -1    3.50    0.50 
   9   1  -1    3.97    0.54 
  -9   1   1    3.86    0.24 
   9   1  -1    3.80    0.51 
  -9   1   1    3.46    0.63 
   9   1  -1    4.30    0.39 
  -9   1   1    3.63    0.37 
  -9   1   1    4.49    0.40 
   7  -1  -1    0.13    0.10 
  -7  -1   1    0.18    0.22 
  -7  -1   1    0.03    0.22 
   7  -1  -1    0.27    0.22 
   7  -1  -1    0.20    0.13 
   7  -1  -1    0.22    0.14 
   7  -1  -1    0.09    0.13 
  -7  -1   1    0.31    0.30 
   7  -1  -1   -0.03    0.12 
  -7  -1   1    0.12    0.13 
   7  -1  -1    0.21    0.26 
  -7  -1   1    0.43    0.24 
  -7  -1   1    0.09    0.23 
  -7  -1   1   -0.09    0.17 
   7  -1  -1    0.01    0.16 
   7  -1  -1    0.16    0.21 
   7  -1  -1    0.18    0.11 
  -7  -1   1   -0.25    0.20 
   7  -1  -1    0.17    0.14 
   7  -1  -1    0.21    0.16 
  -7  -1   1    0.54    0.22 
  -7   1   1   -0.03    0.17 
  -7   1   1    0.20    0.20 
   7   1  -1   -0.07    0.22 
  -7   1   1   -0.06    0.14 
  -7   1   1    0.13    0.16 
   7   1  -1    0.20    0.25 
  -7   1   1    0.24    0.14 
   7   1  -1    0.16    0.24 
  -7   1   1   -0.33    0.24 
  -7   1   1    0.01    0.21 
   7   1  -1    0.02    0.21 
   7   1  -1   -0.14    0.22 
  -7   1   1    0.18    0.18 
   7   1  -1   -0.02    0.23 
   7   1  -1    0.04    0.23 
  -7   1   1    0.12    0.14 
   7   1  -1    0.45    0.28 
  -5  -1   1   11.21    0.73 
   5  -1  -1   10.99    0.52 
   5  -1  -1   10.68    0.60 
   5  -1  -1   11.32    0.58 
  -5  -1   1   10.65    0.61 
   5  -1  -1   11.78    0.46 
  -5  -1   1   11.90    0.64 
  -5  -1   1    9.96    0.63 
  -5  -1   1   11.03    0.60 
   5  -1  -1   11.23    0.42 
   5  -1  -1   10.62    0.51 
  -5  -1   1   11.71    0.61 
  -5  -1   1   10.45    0.62 
  -5  -1   1   12.14    0.63 
   5  -1  -1   10.26    0.51 
   5  -1  -1   10.66    0.65 
   5  -1  -1   10.56    0.40 
   5   1  -1   11.83    0.66 
   5   1  -1   10.98    0.63 
  -5   1   1   11.06    0.49 
  -5   1   1   11.68    0.61 
   5   1  -1   10.96    0.64 
  -5   1   1    9.95    0.44 
   5   1  -1   12.12    0.65 
   5   1  -1   10.03    0.70 
  -5   1   1    9.61    0.52 
   5   1  -1   11.72    0.63 
  -5   1   1    9.75    0.64 
   5   1  -1   11.04    0.61 
  -5   1   1   11.15    0.50 
   5   1  -1   11.33    0.64 
  -5   1   1   10.80    0.44 
  -3  -1   1    1.72    0.30 
  -3  -1   1    1.38    0.24 
  -3  -1   1    1.34    0.25 
   3  -1  -1    1.20    0.22 
  -3  -1   1    0.71    0.15 
   3  -1  -1    1.80    0.18 
  -3  -1   1    2.14    0.25 
   3  -1  -1    1.86    0.18 
  -3  -1   1    2.11    0.28 
  -3  -1   1    1.02    0.22 
   3  -1  -1    1.43    0.15 
  -3  -1   1    1.77    0.27 
   3  -1  -1    1.88    0.25 
   3   1  -1    1.17    0.28 
  -3   1   1    1.85    0.26 
  -3   1   1    1.42    0.18 
  -3   1   1    1.45    0.23 
   3   1  -1    1.24    0.27 
  -3   1   1    1.71    0.21 
  -3   1   1    1.45    0.14 
   3   1  -1    1.48    0.28 
   3   1  -1    1.53    0.30 
   3   1  -1    1.31    0.23 
   3   1  -1    1.39    0.25 
   3   1  -1    1.82    0.28 
   3   1  -1    1.95    0.24 
  -1  -1   1  925.65   29.93 
  -1  -1   1  951.56   30.13 
  -1  -1   1  962.32   30.23 
  -1  -1   1  868.48   30.18 
   1  -1  -1  913.75   29.99 
  -1  -1   1  910.13   30.23 
   1  -1  -1  920.17   29.99 
   1  -1  -1  913.02   29.99 
  -1  -1   1  922.11   30.20 
   1  -1  -1  945.97   30.03 
  -1  -1   1  922.42   30.07 
  -1  -1   1  941.34   30.02 
  -1  -1   1  935.79   30.05 
  -1  -1   1  941.76   30.09 
   1   1  -1  941.85   30.03 
   1   1  -1  941.82   30.19 
   1   1  -1  910.07   30.08 
   1   1  -1  932.11   30.06 
   1   1  -1  940.73   30.08 
   1   1  -1  911.94   29.95 
  -1   1   1  889.32   29.99 
  -1   1   1  923.17   29.94 
   1   1  -1  939.91   30.11 
   1   1  -1  932.61   30.13 
   1   1  -1  941.43   30.01 
   1   1  -1  936.28   29.94 
  -1   1   1  915.05   29.97 
  -1   1   1  900.42   29.99 
  -1   1   1  941.42   30.18 
  -1  -1  -1  311.29   10.00 
  -1  -1  -1  309.85   10.03 
  -1  -1  -1  305.17   10.02 
   1  -1   1  315.74   10.01 
   1  -1   1  311.96    9.99 
  -1  -1  -1  308.93   10.02 
  -1  -1  -1  306.80   10.03 
  -1  -1  -1  306.06   10.02 
  -1  -1  -1  311.96   10.00 
   1  -1   1  314.39    9.98 
  -1  -1  -1  296.76   10.02 
   1  -1   1  310.27   10.02 
   1  -1   1  312.42   10.02 
   1  -1   1  294.89    9.95 
   1  -1   1  305.64    9.97 
  -1   1  -1  318.13    9.97 
  -1   1  -1  283.50    9.97 
   1   1   1  308.28   10.03 
  -1   1  -1  317.39   10.00 
   1   1   1  314.17   10.00 
   1   1   1  304.99   10.02 
  -1   1  -1  313.08   10.01 
  -1   1  -1  312.80   10.00 
  -1   1  -1  300.65    9.94 
  -1   1  -1  316.15    9.97 
   1   1   1  312.19   10.03 
   1   1   1  309.55   10.01 
   3  -1   1   16.23    0.60 
   3  -1   1   17.17    0.70 
   3  -1   1   16.96    0.60 
  -3  -1  -1   17.38    0.73 
   3  -1   1   17.07    0.60 
   3  -1   1   16.72    0.65 
   3  -1   1   17.34    0.73 
  -3  -1  -1   16.48    0.76 
  -3  -1  -1   17.48    0.74 
  -3  -1  -1   17.43    0.72 
   3  -1   1   16.23    0.60 
  -3  -1  -1   17.07    0.79 
   3  -1   1   16.48    0.67 
  -3  -1  -1   17.29    0.73 
  -3  -1  -1   17.30    0.74 
   3  -1   1   16.67    0.64 
   3  -1   1   17.36    0.71 
  -3  -1  -1   18.01    0.72 
   3   1   1   16.70    0.73 
  -3   1  -1   16.43    0.61 
  -3   1  -1   16.95    0.72 
  -3   1  -1   16.75    0.61 
   3   1   1   17.16    0.78 
   3   1   1   17.17    0.75 
  -3   1  -1   17.69    0.68 
  -3   1  -1   16.39    0.71 
   3   1   1   16.88    0.75 
   3   1   1   17.53    0.76 
  -3   1  -1   17.32    0.65 
  -3   1  -1   17.35    0.61 
  -3   1  -1   17.54    0.67 
  -3   1  -1   17.65    0.60 
   3   1   1   17.01    0.71 
   3   1   1   16.08    0.72 
   3   1   1   17.22    0.74 
   3   1   1   17.29    0.76 
  -5  -1  -1   56.58    2.07 
  -5  -1  -1   58.35    2.15 
  -5  -1  -1   60.37    2.24 
  -5  -1  -1   59.59    2.12 
   5  -1   1   56.84    1.96 
  -5  -1  -1   60.35    2.13 
   5  -1   1   59.95    2.13 
   5  -1   1   59.13    2.06 
   5  -1   1   57.81    1.99 
   5  -1   1   58.24    1.97 
   5  -1   1   57.17    1.98 
  -5  -1  -1   60.72    2.13 
   5  -1   1   59.61    2.00 
   5  -1   1   57.30    2.05 
  -5  -1  -1   59.61    2.13 
   5  -1   1   59.39    2.14 
  -5  -1  -1   58.95    2.11 
  -5  -1  -1   57.15    2.10 
   5  -1   1   58.76    2.07 
   5   1   1   58.42    2.13 
  -5   1  -1   58.98    2.01 
   5   1   1   58.49    2.14 
   5   1   1   59.23    2.14 
  -5   1  -1   55.35    1.97 
   5   1   1   59.57    2.14 
  -5   1  -1   58.07    1.94 
  -5   1  -1   59.48    2.01 
   5   1   1   58.94    2.13 
  -5   1  -1   60.59    1.97 
  -5   1  -1   58.29    2.09 
  -5   1  -1   55.30    1.98 
   5   1   1   59.72    2.11 
  -5   1  -1   59.35    2.17 
  -5   1  -1   56.13    2.05 
   5   1   1   62.11    2.14 
  -5   1  -1   60.47    2.07 
   5   1   1   60.23    2.22 
   5   1   1   59.51    2.12 
   7  -1   1   48.40    1.75 
  -7  -1  -1   47.32    1.74 
   7  -1   1   46.49    1.67 
  -7  -1  -1   49.18    1.99 
  -7  -1  -1   49.15    1.78 
   7  -1   1   46.88    1.64 
   7  -1   1   46.35    1.76 
   7  -1   1   46.25    1.65 
   7  -1   1   47.06    1.87 
  -7  -1  -1   48.09    1.81 
   7  -1   1   46.83    1.73 
  -7  -1  -1   45.18    1.76 
  -7  -1  -1   47.77    1.84 
  -7  -1  -1   45.37    1.72 
   7  -1   1   48.53    1.82 
   7  -1   1   47.19    1.64 
  -7  -1  -1   48.79    1.82 
  -7  -1  -1   46.55    1.65 
   7  -1   1   46.80    1.69 
  -7  -1  -1   48.29    1.81 
  -7  -1  -1   47.35    1.84 
  -7   1  -1   47.15    1.71 
   7   1   1   47.29    1.94 
  -7   1  -1   46.34    1.91 
   7   1   1   48.76    2.03 
  -7   1  -1   46.82    1.76 
   7   1   1   48.47    1.83 
  -7   1  -1   49.61    1.79 
   7   1   1   44.97    1.82 
   7   1   1   47.09    1.79 
  -7   1  -1   48.33    1.64 
  -7   1  -1   47.71    1.59 
  -7   1  -1   47.50    1.68 
   7   1   1   47.68    1.84 
   7   1   1   47.46    1.84 
  -7   1  -1   48.29    1.67 
  -7   1  -1   44.11    1.65 
  -7   1  -1   46.75    1.74 
   7   1   1   48.47    1.83 
   7   1   1   47.08    1.81 
   9  -1   1  359.76   12.10 
  -9  -1  -1  371.66   12.17 
   9  -1   1  367.75   11.94 
  -9  -1  -1  365.99   12.04 
  -9  -1  -1  371.40   12.13 
   9  -1   1  382.69   11.92 
   9  -1   1  368.20   12.24 
  -9  -1  -1  358.34   12.10 
   9  -1   1  373.05   11.99 
  -9  -1  -1  361.01   12.03 
  -9  -1  -1  366.30   12.38 
   9  -1   1  357.59   12.04 
  -9  -1  -1  374.95   12.07 
   9  -1   1  362.96   12.06 
   9  -1   1  371.53   12.01 
  -9  -1  -1  363.13   11.92 
  -9  -1  -1  360.44   12.13 
   9  -1   1  354.13   11.96 
  -9   1  -1  366.65   12.06 
  -9   1  -1  367.05   12.29 
  -9   1  -1  350.98   12.04 
   9   1   1  376.29   12.33 
   9   1   1  375.91   12.16 
  -9   1  -1  348.03   11.94 
   9   1   1  372.63   12.13 
   9   1   1  360.23   12.15 
   9   1   1  367.98   12.11 
  -9   1  -1  378.45   12.03 
  -9   1  -1  367.64   11.87 
   9   1   1  364.27   12.11 
  -9   1  -1  367.41   11.94 
   9   1   1  376.71   12.16 
  -9   1  -1  376.51   11.93 
  -9   1  -1  358.44   12.00 
   9   1   1  358.44   12.16 
  -9   1  -1  378.94   12.12 
  11  -1   1  123.82    4.09 
  11  -1   1  123.65    4.29 
 -11  -1  -1  121.44    4.32 
 -11  -1  -1  120.79    4.04 
  11  -1   1  120.62    4.16 
 -11  -1  -1  121.53    4.27 
  11  -1   1  120.17    4.05 
 -11  -1  -1  121.90    4.35 
  11  -1   1  120.55    4.16 
 -11  -1  -1  118.74    4.21 
 -11  -1  -1  117.42    4.17 
  11  -1   1  122.75    4.46 
  11  -1   1  120.35    4.20 
  11  -1   1  125.46    4.17 
 -11  -1  -1  116.37    4.58 
 -11  -1  -1  122.40    4.20 
  11  -1   1  120.29    4.18 
 -11   1  -1  116.92    4.50 
  11   1   1  115.66    4.50 
  11   1   1  121.00    4.36 
 -11   1  -1  119.61    4.22 
 -11   1  -1  115.21    4.17 
 -11   1  -1  122.24    4.12 
 -11   1  -1  121.54    4.20 
  11   1   1  114.48    4.31 
  11   1   1  124.71    4.34 
  11   1   1  123.49    4.31 
 -11   1  -1  121.53    4.00 
  11   1   1  123.19    4.35 
 -11   1  -1  121.79    4.07 
 -11   1  -1  118.68    4.21 
  11   1   1  121.97    4.29 
  11   1   1  126.58    4.29 
 -11   1  -1  123.00    4.08 
  13  -1   1   55.31    2.13 
  13  -1   1   57.34    2.10 
 -13  -1  -1   54.19    2.26 
  13  -1   1   56.53    2.12 
  13  -1   1   53.15    2.10 
  13  -1   1   56.64    2.25 
 -13  -1  -1   55.53    1.92 
 -13  -1  -1   54.42    2.56 
 -13  -1  -1   54.61    2.08 
 -13  -1  -1   56.87    2.15 
 -13  -1  -1   54.86    2.28 
 -13  -1  -1   52.23    2.07 
  13  -1   1   52.75    2.38 
  13  -1   1   53.33    1.93 
 -13  -1  -1   50.86    2.17 
  13  -1   1   53.35    1.99 
  13  -1   1   56.18    2.11 
  13   1   1   53.72    2.47 
 -13   1  -1   52.64    1.87 
 -13   1  -1   50.73    2.13 
  13   1   1   56.60    2.25 
  13   1   1   52.10    2.28 
 -13   1  -1   55.59    1.97 
 -13   1  -1   55.68    2.15 
  13   1   1   54.28    2.29 
 -13   1  -1   52.54    2.14 
 -13   1  -1   52.23    2.10 
  13   1   1   51.74    2.15 
  13   1   1   52.71    2.19 
  13   1   1   52.53    2.25 
  13   1   1   55.76    2.28 
 -13   1  -1   52.75    2.48 
 -13   1  -1   54.97    2.02 
 -15  -1  -1    3.97    0.74 
 -15  -1  -1    3.04    0.45 
  15  -1   1    2.30    0.38 
 -15  -1  -1    3.81    0.64 
  15  -1   1    3.14    0.67 
  15  -1   1    3.18    0.58 
  15  -1   1    2.88    0.61 
  15  -1   1    2.53    0.67 
  15  -1   1    3.03    0.55 
  15  -1   1    3.20    0.55 
 -15  -1  -1    3.00    0.38 
  15  -1   1    3.31    0.45 
 -15  -1  -1    2.39    0.49 
 -15  -1  -1    2.58    0.76 
 -15  -1  -1    2.88    0.62 
 -15  -1  -1    3.73    0.61 
  15  -1   1    2.88    0.58 
 -15   1  -1    3.24    0.45 
 -15   1  -1    4.55    0.63 
  15   1   1    4.34    0.76 
 -15   1  -1    2.75    0.54 
 -15   1  -1    3.76    0.60 
  15   1   1    3.04    0.71 
 -15   1  -1    4.48    0.60 
  15   1   1    3.51    0.72 
  15   1   1    3.36    0.72 
  15   1   1    3.86    0.63 
 -15   1  -1    2.81    0.30 
 -15   1  -1    2.04    0.70 
 -15   1  -1    2.99    0.49 
  15   1   1    2.16    0.57 
  17  -1   1   17.15    1.03 
 -17  -1  -1   16.57    1.28 
 -17  -1  -1   14.07    1.50 
 -17  -1  -1   17.50    1.11 
  17  -1   1   13.48    1.06 
  17  -1   1   15.76    1.08 
 -17  -1  -1   16.60    1.26 
  17  -1   1   16.46    1.19 
 -17  -1  -1   18.05    0.82 
  17  -1   1   15.84    1.14 
 -17  -1  -1   17.54    1.10 
  17  -1   1   17.02    1.09 
 -17   1  -1   16.41    0.72 
 -17   1  -1   17.56    0.89 
 -17   1  -1   17.06    1.09 
  17   1   1   18.68    1.30 
  17   1   1   18.14    1.29 
  17   1   1   17.71    1.23 
 -17   1  -1   16.84    1.15 
 -17   1  -1   18.30    1.14 
 -17   1  -1   16.37    0.96 
  17   1   1   14.46    1.20 
 -17   1  -1   16.54    1.52 
 -19  -1  -1    1.98    0.44 
  19  -1   1    1.58    0.56 
  19  -1   1    1.34    0.70 
 -19  -1  -1    0.73    0.49 
  19  -1   1    0.85    0.64 
 -19  -1  -1    2.33    0.60 
  19  -1   1    1.20    0.60 
 -19  -1  -1    2.00    0.65 
 -19  -1  -1    1.74    0.90 
 -19  -1  -1    2.12    0.72 
 -19   1  -1    1.61    0.45 
 -19   1  -1    0.85    0.80 
 -19   1  -1    1.45    0.43 
 -19   1  -1    2.81    0.67 
  19   1   1    2.04    0.74 
  19   1   1    0.73    0.67 
  19   1   1    1.48    0.63 
 -19   1  -1    0.73    0.49 
 -19   1  -1    1.68    0.60 
 -21  -1  -1    8.07    0.99 
 -21  -1  -1    9.91    1.03 
  21  -1   1    8.26    1.18 
 -21  -1  -1    7.97    1.20 
 -21  -1  -1   10.76    1.63 
  21  -1   1    8.92    1.22 
 -21  -1  -1    9.89    1.29 
 -21   1  -1    8.85    1.03 
  21   1   1   10.65    1.26 
  21   1   1    8.39    1.37 
 -21   1  -1    6.99    1.13 
 -21   1  -1    6.61    1.60 
 -21   1  -1    8.10    1.05 
 -21   1  -1    8.34    0.84 
  23  -1   1   20.46    1.60 
 -23  -1  -1   16.54    2.50 
 -23  -1  -1   20.03    1.81 
 -23  -1  -1   17.81    1.69 
 -23  -1  -1   20.39    1.52 
  23  -1   1   20.52    1.76 
  23   1   1   19.55    1.69 
 -23   1  -1   21.05    1.60 
 -23   1  -1   18.61    1.20 
 -23   1  -1   16.87    1.61 
 -23   1  -1   18.25    2.49 
  23   1   1   18.02    1.83 
  25  -1   1   26.78    2.31 
 -25  -1  -1   30.80    2.29 
 -25  -1  -1   34.28    2.10 
 -25   1  -1   30.93    2.07 
  25   1   1   27.50    2.12 
 -25   1  -1   32.25    3.07 
 -26  -2   1    5.54    1.14 
 -26  -2   1    4.86    1.38 
  26  -2  -1    3.98    1.28 
 -26   2   1    3.85    1.01 
  26   2  -1    4.82    1.37 
  24  -2  -1    2.01    1.02 
 -24  -2   1    3.49    1.46 
 -24  -2   1    3.97    1.13 
 -24  -2   1    2.67    0.84 
  24  -2  -1    3.96    0.99 
 -24  -2   1    3.00    0.93 
 -24   2   1    2.89    1.41 
  24   2  -1    2.47    1.03 
  24   2  -1    2.49    1.03 
 -24   2   1    2.91    0.89 
 -24   2   1    3.58    0.65 
 -22  -2   1    0.83    0.73 
 -22  -2   1   -0.49    0.83 
  22  -2  -1    0.19    0.75 
  22  -2  -1    0.37    0.64 
 -22  -2   1    0.10    0.66 
 -22  -2   1    0.09    0.59 
  22   2  -1    0.05    0.76 
 -22   2   1    0.12    0.34 
 -22   2   1    0.67    0.89 
 -22   2   1   -0.43    0.58 
 -22   2   1   -0.38    0.52 
 -22   2   1   -0.25    0.46 
  22   2  -1   -0.65    0.74 
 -20  -2   1    0.50    0.61 
 -20  -2   1    0.57    0.80 
  20  -2  -1    0.01    0.51 
  20  -2  -1    0.77    0.67 
  20  -2  -1    0.77    0.55 
 -20  -2   1   -0.37    0.49 
 -20  -2   1    0.69    0.55 
 -20  -2   1    0.08    0.64 
  20  -2  -1    0.26    0.46 
 -20   2   1   -0.03    0.31 
 -20   2   1    0.64    0.40 
 -20   2   1    0.12    0.47 
 -20   2   1   -0.05    0.40 
  20   2  -1    0.22    0.63 
  20   2  -1    0.25    0.66 
 -20   2   1   -0.50    0.51 
 -20   2   1    0.21    0.82 
  20   2  -1    0.30    0.68 
  20   2  -1    0.15    0.65 
 -18  -2   1    0.97    0.45 
 -18  -2   1    0.85    0.76 
  18  -2  -1   -0.19    0.40 
  18  -2  -1    0.45    0.44 
  18  -2  -1    0.65    0.26 
 -18  -2   1    0.68    0.51 
 -18  -2   1    0.32    0.51 
 -18  -2   1    0.22    0.34 
  18  -2  -1    0.27    0.57 
  18  -2  -1    0.53    0.43 
 -18  -2   1    0.35    0.24 
 -18  -2   1    0.76    0.58 
  18  -2  -1    0.80    0.43 
 -18  -2   1    0.76    0.51 
  18   2  -1    0.76    0.62 
 -18   2   1    0.67    0.51 
 -18   2   1    0.20    0.43 
 -18   2   1    0.31    0.63 
 -18   2   1    1.02    0.39 
 -18   2   1    0.65    0.31 
  18   2  -1    0.55    0.59 
  18   2  -1    0.56    0.56 
 -18   2   1    0.80    0.39 
  18   2  -1   -0.49    0.55 
 -16  -2   1   75.51    3.56 
 -16  -2   1   79.95    2.69 
  16  -2  -1   76.89    3.37 
 -16  -2   1   79.73    3.03 
 -16  -2   1   78.28    3.14 
  16  -2  -1   76.94    2.72 
  16  -2  -1   77.00    2.91 
 -16  -2   1   77.38    3.01 
  16  -2  -1   82.11    2.96 
 -16  -2   1   73.26    2.88 
 -16  -2   1   79.29    3.20 
  16  -2  -1   80.58    2.74 
 -16  -2   1   76.97    2.70 
  16  -2  -1   79.29    2.92 
  16  -2  -1   81.83    3.15 
  16  -2  -1   78.44    2.96 
 -16  -2   1   78.36    3.26 
 -16   2   1   79.10    3.05 
  16   2  -1   79.94    3.27 
 -16   2   1   76.74    2.82 
  16   2  -1   78.83    3.25 
 -16   2   1   74.57    2.88 
 -16   2   1   81.18    3.45 
 -16   2   1   80.01    2.79 
 -16   2   1   80.46    2.95 
  16   2  -1   82.16    3.24 
  16   2  -1   77.61    3.14 
  16   2  -1   82.53    3.30 
  16   2  -1   80.31    3.20 
 -14  -2   1   92.38    3.35 
  14  -2  -1   94.51    3.20 
 -14  -2   1   93.25    3.58 
 -14  -2   1   97.03    3.63 
 -14  -2   1   93.34    3.19 
 -14  -2   1   93.20    3.65 
  14  -2  -1   91.77    3.38 
  14  -2  -1   95.92    3.33 
 -14  -2   1   94.59    3.50 
  14  -2  -1   97.31    3.40 
  14  -2  -1   92.87    3.14 
 -14  -2   1   90.21    3.45 
  14  -2  -1   95.86    3.33 
 -14  -2   1   97.21    3.98 
  14  -2  -1   93.74    3.72 
  14  -2  -1   93.78    3.30 
  14  -2  -1   94.70    3.54 
 -14   2   1   91.25    3.30 
  14   2  -1   92.49    3.62 
 -14   2   1   98.13    3.81 
  14   2  -1   94.28    3.66 
 -14   2   1   99.39    3.39 
  14   2  -1   96.53    3.67 
 -14   2   1   94.82    3.48 
  14   2  -1   96.45    3.64 
 -14   2   1   93.73    3.23 
  14   2  -1   93.10    3.68 
 -14   2   1   92.37    3.28 
  14   2  -1   96.66    3.60 
  14   2  -1   86.88    3.55 
 -12  -2   1   15.03    1.20 
 -12  -2   1   14.77    1.03 
  12  -2  -1   13.72    0.71 
 -12  -2   1   14.60    0.65 
  12  -2  -1   14.31    0.70 
 -12  -2   1   14.40    0.98 
  12  -2  -1   13.55    0.99 
 -12  -2   1   13.57    0.96 
  12  -2  -1   14.76    0.70 
  12  -2  -1   13.97    0.63 
  12  -2  -1   14.31    0.78 
 -12  -2   1   15.56    0.95 
  12  -2  -1   15.44    0.78 
 -12  -2   1   13.96    0.76 
  12  -2  -1   15.69    0.93 
 -12  -2   1   13.28    0.88 
  12  -2  -1   14.35    0.56 
  12   2  -1   14.30    0.98 
 -12   2   1   14.98    0.76 
  12   2  -1   13.61    0.98 
  12   2  -1   16.81    1.08 
 -12   2   1   15.36    1.10 
 -12   2   1   13.91    0.85 
 -12   2   1   13.90    0.64 
  12   2  -1   13.81    1.11 
  12   2  -1   13.72    1.00 
 -12   2   1   14.69    0.74 
  12   2  -1   13.08    0.98 
  12   2  -1   14.10    0.94 
  12   2  -1   14.25    1.01 
 -12   2   1   13.99    0.70 
 -10  -2   1    6.82    0.64 
  10  -2  -1    7.88    0.44 
 -10  -2   1    9.73    0.76 
 -10  -2   1    6.63    0.83 
 -10  -2   1    7.71    0.73 
 -10  -2   1    7.94    0.75 
  10  -2  -1    8.10    0.42 
 -10  -2   1    7.24    0.52 
  10  -2  -1    7.88    0.63 
  10  -2  -1    9.71    0.76 
  10  -2  -1    7.27    0.42 
 -10  -2   1    7.06    0.67 
  10  -2  -1    8.40    0.53 
  10  -2  -1    8.87    0.55 
 -10   2   1    7.81    0.69 
  10   2  -1    8.64    0.71 
  10   2  -1    8.12    0.74 
  10   2  -1    8.03    0.74 
  10   2  -1    7.23    0.72 
 -10   2   1    8.73    0.52 
 -10   2   1    8.42    0.60 
  10   2  -1    7.76    0.73 
 -10   2   1    7.92    0.52 
 -10   2   1    7.82    0.44 
 -10   2   1    6.53    0.73 
  10   2  -1    7.96    0.81 
  10   2  -1    8.51    0.75 
  10   2  -1    8.30    0.78 
 -10   2   1    7.25    0.39 
  -8  -2   1   24.36    1.14 
  -8  -2   1   24.31    1.12 
  -8  -2   1   23.39    1.17 
   8  -2  -1   23.88    1.13 
  -8  -2   1   23.45    1.10 
  -8  -2   1   21.96    1.12 
   8  -2  -1   22.60    0.99 
   8  -2  -1   23.81    0.90 
  -8  -2   1   23.18    1.26 
   8  -2  -1   21.14    1.00 
  -8  -2   1   24.47    1.37 
   8  -2  -1   21.43    0.98 
  -8  -2   1   21.24    1.08 
   8  -2  -1   21.94    0.91 
  -8   2   1   22.82    0.82 
   8   2  -1   23.45    1.15 
  -8   2   1   22.27    1.13 
   8   2  -1   22.44    1.12 
   8   2  -1   23.77    1.18 
   8   2  -1   22.45    1.14 
   8   2  -1   22.56    1.09 
   8   2  -1   22.99    1.23 
  -8   2   1   23.27    0.95 
  -8   2   1   22.43    0.89 
  -8   2   1   21.97    1.10 
   8   2  -1   22.98    1.14 
   8   2  -1   23.00    1.15 
  -8   2   1   21.44    0.99 
  -6  -2   1    6.06    0.48 
   6  -2  -1    5.83    0.48 
  -6  -2   1    5.56    0.52 
   6  -2  -1    5.82    0.40 
   6  -2  -1    6.13    0.51 
  -6  -2   1    6.72    0.52 
  -6  -2   1    5.69    0.52 
   6  -2  -1    6.32    0.43 
  -6  -2   1    7.03    0.64 
   6  -2  -1    6.55    0.38 
  -6  -2   1    6.99    0.59 
  -6  -2   1    6.95    0.56 
   6  -2  -1    6.26    0.34 
   6  -2  -1    5.68    0.45 
  -6  -2   1    6.08    0.52 
   6   2  -1    6.55    0.60 
   6   2  -1    5.33    0.56 
   6   2  -1    6.41    0.57 
   6   2  -1    6.36    0.53 
  -6   2   1    5.90    0.43 
   6   2  -1    6.49    0.60 
   6   2  -1    6.33    0.51 
  -6   2   1    6.60    0.50 
  -6   2   1    6.67    0.32 
  -6   2   1    6.41    0.43 
   6   2  -1    5.53    0.43 
   6   2  -1    6.94    0.58 
  -6   2   1    5.35    0.52 
   6   2  -1    6.73    0.59 
  -4  -2   1  985.14   31.34 
   4  -2  -1  980.91   31.28 
   4  -2  -1  969.76   31.28 
  -4  -2   1  968.25   31.35 
  -4  -2   1  976.50   31.43 
   4  -2  -1  951.01   31.38 
  -4  -2   1  988.60   31.38 
  -4  -2   1  979.55   31.41 
   4  -2  -1  954.20   31.28 
  -4  -2   1 1000.00   31.40 
   4  -2  -1  974.54   31.27 
  -4  -2   1  955.41   31.40 
  -4  -2   1  992.27   31.41 
  -4   2   1  937.02   31.18 
   4   2  -1  940.54   31.40 
   4   2  -1  998.00   31.41 
   4   2  -1  965.59   31.40 
  -4   2   1  960.29   31.38 
   4   2  -1  962.47   31.38 
  -4   2   1  935.11   31.18 
  -4   2   1  962.49   31.29 
   4   2  -1  992.90   31.40 
   4   2  -1  975.35   31.34 
   4   2  -1  937.53   31.43 
   4   2  -1  976.19   31.41 
   4   2  -1  974.91   31.34 
   2  -2  -1  352.25   11.84 
  -2  -2   1  372.13   11.98 
   2  -2  -1  374.35   11.87 
  -2  -2   1  376.21   11.99 
  -2  -2   1  358.24   11.90 
   2  -2  -1  373.69   11.93 
   2  -2  -1  364.03   11.98 
  -2  -2   1  372.72   11.95 
   2  -2  -1  365.59   11.86 
  -2  -2   1  364.05   11.92 
  -2  -2   1  371.02   11.99 
  -2  -2   1  367.11   11.96 
  -2  -2   1  359.90   11.85 
  -2  -2   1  369.27   11.99 
   2  -2  -1  345.04   11.84 
   2  -2  -1  359.91   11.86 
  -2  -2   1  360.92   11.92 
  -2   2   1  362.00   11.86 
   2   2  -1  360.18   11.86 
   2   2  -1  373.92   11.94 
  -2   2   1  360.39   11.97 
   2   2  -1  364.44   11.99 
  -2   2   1  376.92   11.85 
  -2   2   1  377.49   11.84 
   2   2  -1  366.62   11.98 
   2   2  -1  364.14   11.90 
   2   2  -1  365.61   11.84 
   2   2  -1  363.12   11.98 
   2   2  -1  368.86   11.92 
  -2   2   1  364.07   11.87 
   2   2  -1  374.24   11.98 
   0  -2   1   44.08    1.52 
   0  -2   1   40.39    1.49 
   0  -2   1   40.70    1.51 
   0  -2   1   42.67    1.41 
   0  -2   1   42.23    1.51 
   0  -2  -1   39.93    1.51 
   0  -2   1   41.87    1.50 
   0  -2  -1   40.82    1.52 
   0  -2  -1   41.11    1.44 
   0  -2   1   42.45    1.41 
   0  -2  -1   41.58    1.52 
   0  -2  -1   40.92    1.44 
   0  -2  -1   44.50    1.51 
   0  -2   1   40.99    1.50 
   0  -2   1   42.97    1.51 
   0  -2  -1   41.15    1.50 
   0  -2   1   40.90    1.44 
   0   2   1   41.22    1.44 
   0   2  -1   41.78    1.51 
   0   2  -1   39.57    1.48 
   0   2   1   43.12    1.52 
   0   2  -1   40.05    1.40 
   0   2  -1   40.64    1.51 
   0   2  -1   39.43    1.40 
   0   2   1   41.80    1.52 
   0   2   1   41.26    1.43 
   0   2  -1   39.15    1.48 
   0   2  -1   40.24    1.49 
   0   2   1   40.15    1.50 
   0   2  -1   39.07    1.51 
   0   2  -1   42.37    1.44 
   0   2   1   43.77    1.53 
   0   2   1   42.67    1.52 
  -2  -2  -1   54.73    1.98 
   2  -2   1   55.33    1.84 
   2  -2   1   53.82    1.84 
   2  -2   1   53.80    1.78 
  -2  -2  -1   54.99    1.96 
  -2  -2  -1   53.65    1.91 
   2  -2   1   54.48    1.86 
  -2  -2  -1   54.84    1.99 
  -2  -2  -1   52.08    1.92 
  -2  -2  -1   55.48    1.98 
  -2  -2  -1   55.08    2.00 
   2  -2   1   52.56    1.95 
  -2  -2  -1   54.34    1.88 
  -2  -2  -1   51.82    1.96 
   2  -2   1   52.70    1.91 
   2  -2   1   56.16    1.87 
   2   2   1   54.06    1.99 
   2   2   1   53.60    1.94 
  -2   2  -1   52.39    1.94 
   2   2   1   53.34    2.00 
  -2   2  -1   53.86    1.86 
   2   2   1   52.53    1.91 
   2   2   1   55.74    1.97 
  -2   2  -1   54.98    1.81 
   2   2   1   55.59    1.98 
   2   2   1   53.92    1.91 
  -2   2  -1   53.55    1.85 
  -2   2  -1   54.13    1.87 
  -2   2  -1   55.25    1.93 
   4  -2   1  165.02    5.41 
   4  -2   1  163.99    5.50 
  -4  -2  -1  166.03    5.62 
  -4  -2  -1  167.21    5.66 
   4  -2   1  155.59    5.51 
   4  -2   1  160.86    5.39 
  -4  -2  -1  169.38    5.59 
  -4  -2  -1  163.87    5.61 
  -4  -2  -1  168.36    5.59 
   4  -2   1  167.66    5.44 
  -4  -2  -1  173.23    5.66 
  -4  -2  -1  169.60    5.63 
   4  -2   1  173.24    5.42 
   4  -2   1  168.21    5.62 
  -4  -2  -1  162.99    5.55 
  -4  -2  -1  163.98    5.62 
   4  -2   1  162.66    5.49 
   4  -2   1  164.70    5.40 
   4  -2   1  161.65    5.59 
   4   2   1  169.90    5.54 
   4   2   1  168.73    5.65 
   4   2   1  166.10    5.58 
   4   2   1  169.03    5.62 
   4   2   1  167.50    5.64 
   4   2   1  169.93    5.64 
  -4   2  -1  162.88    5.52 
   4   2   1  168.09    5.64 
  -4   2  -1  165.57    5.59 
   4   2   1  167.63    5.57 
  -4   2  -1  169.80    5.42 
  -4   2  -1  165.35    5.41 
  -4   2  -1  159.71    5.51 
   4   2   1  169.96    5.64 
  -6  -2  -1   25.55    1.20 
   6  -2   1   25.72    0.90 
  -6  -2  -1   26.71    1.15 
   6  -2   1   25.28    1.00 
   6  -2   1   26.96    1.20 
  -6  -2  -1   24.95    1.16 
   6  -2   1   26.50    0.91 
  -6  -2  -1   25.06    1.25 
   6  -2   1   24.18    1.08 
   6  -2   1   26.12    1.05 
   6  -2   1   25.48    1.01 
   6  -2   1   26.65    0.93 
   6  -2   1   25.33    0.90 
  -6  -2  -1   25.19    1.14 
  -6  -2  -1   25.57    1.15 
   6  -2   1   25.40    1.09 
  -6  -2  -1   27.08    1.16 
  -6  -2  -1   27.75    1.19 
  -6   2  -1   23.98    0.91 
   6   2   1   26.10    1.19 
   6   2   1   26.37    1.19 
   6   2   1   26.75    1.19 
  -6   2  -1   26.22    1.05 
  -6   2  -1   24.31    1.04 
   6   2   1   26.60    1.14 
   6   2   1   25.54    1.09 
   6   2   1   25.48    1.22 
  -6   2  -1   25.76    1.13 
   6   2   1   25.96    1.13 
   6   2   1   25.41    1.18 
  -6   2  -1   25.99    0.91 
  -6   2  -1   25.34    1.13 
  -6   2  -1   26.02    0.92 
   6   2   1   25.02    1.18 
  -8  -2  -1   70.30    2.63 
   8  -2   1   66.89    2.50 
  -8  -2  -1   68.13    2.58 
  -8  -2  -1   69.74    2.62 
   8  -2   1   69.12    2.32 
   8  -2   1   71.00    2.40 
   8  -2   1   69.83    2.34 
   8  -2   1   68.71    2.49 
   8  -2   1   68.15    2.52 
  -8  -2  -1   73.01    2.69 
  -8  -2  -1   69.86    2.59 
   8  -2   1   71.46    2.61 
  -8  -2  -1   70.98    2.80 
  -8  -2  -1   70.95    2.62 
   8  -2   1   68.25    2.30 
   8  -2   1   69.13    2.38 
   8   2   1   67.41    2.61 
   8   2   1   67.72    2.73 
  -8   2  -1   69.23    2.45 
  -8   2  -1   65.28    2.35 
   8   2   1   72.10    2.64 
   8   2   1   70.93    2.65 
   8   2   1   70.00    2.59 
  -8   2  -1   71.63    2.48 
   8   2   1   69.41    2.66 
  -8   2  -1   68.14    2.65 
  -8   2  -1   67.42    2.38 
   8   2   1   69.92    2.66 
   8   2   1   68.87    2.65 
  -8   2  -1   67.66    2.50 
  -8   2  -1   68.72    2.33 
 -10  -2  -1  314.56   10.79 
  10  -2   1  323.54   10.61 
  10  -2   1  315.67   10.71 
 -10  -2  -1  316.76   11.10 
  10  -2   1  311.05   10.55 
  10  -2   1  329.19   10.89 
  10  -2   1  315.37   10.58 
 -10  -2  -1  327.41   10.87 
 -10  -2  -1  314.84   10.73 
  10  -2   1  323.10   10.51 
  10  -2   1  317.08   10.73 
 -10  -2  -1  330.59   10.85 
  10  -2   1  331.68   10.56 
 -10  -2  -1  333.59   10.81 
 -10  -2  -1  334.65   10.93 
 -10   2  -1  314.06   10.79 
  10   2   1  320.20   10.90 
 -10   2  -1  317.09   10.59 
  10   2   1  322.99   10.87 
 -10   2  -1  322.68   10.73 
 -10   2  -1  326.17   10.65 
  10   2   1  333.36   10.90 
 -10   2  -1  325.31   10.73 
 -10   2  -1  327.01   10.96 
  10   2   1  331.74   11.05 
  10   2   1  330.42   10.83 
  10   2   1  331.45   10.91 
 -10   2  -1  330.25   10.62 
 -10   2  -1  319.45   10.54 
  10   2   1  323.53   10.86 
  10   2   1  331.29   10.86 
  12  -2   1  159.73    5.61 
  12  -2   1  165.55    5.83 
 -12  -2  -1  165.52    5.74 
  12  -2   1  159.97    5.37 
 -12  -2  -1  168.17    5.84 
  12  -2   1  174.21    5.45 
  12  -2   1  160.62    5.46 
 -12  -2  -1  164.36    5.66 
 -12  -2  -1  168.20    5.44 
 -12  -2  -1  166.91    5.78 
 -12  -2  -1  155.53    5.59 
  12  -2   1  160.17    5.43 
  12  -2   1  163.88    5.51 
 -12  -2  -1  167.24    6.09 
  12  -2   1  164.99    5.66 
 -12  -2  -1  159.85    5.58 
 -12   2  -1  166.40    5.53 
 -12   2  -1  156.68    5.41 
  12   2   1  167.11    5.80 
  12   2   1  161.81    5.76 
 -12   2  -1  161.38    5.51 
  12   2   1  161.02    5.79 
  12   2   1  155.77    5.72 
 -12   2  -1  156.98    5.67 
  12   2   1  167.09    5.84 
  12   2   1  163.42    5.73 
  12   2   1  160.55    5.96 
 -12   2  -1  153.62    5.59 
 -12   2  -1  161.03    5.49 
 -12   2  -1  177.00    5.97 
  12   2   1  163.16    5.81 
 -14  -2  -1   21.35    1.29 
  14  -2   1   19.57    0.82 
  14  -2   1   17.55    0.98 
 -14  -2  -1   18.75    1.03 
 -14  -2  -1   20.88    0.88 
  14  -2   1   20.01    0.88 
  14  -2   1   19.15    0.99 
  14  -2   1   16.70    1.24 
  14  -2   1   20.44    1.01 
 -14  -2  -1   22.55    1.10 
 -14  -2  -1   20.96    1.31 
 -14  -2  -1   22.28    1.13 
  14  -2   1   19.82    0.93 
 -14  -2  -1   20.28    1.20 
  14  -2   1   21.70    1.11 
 -14  -2  -1   21.72    1.56 
  14  -2   1   20.24    1.15 
  14   2   1   20.53    1.22 
 -14   2  -1   20.84    1.45 
 -14   2  -1   20.35    1.12 
  14   2   1   17.55    1.18 
 -14   2  -1   19.14    0.88 
  14   2   1   20.05    1.27 
  14   2   1   23.85    1.34 
  14   2   1   19.51    1.28 
 -14   2  -1   15.55    0.95 
 -14   2  -1   19.26    1.19 
 -14   2  -1   20.99    1.05 
  14   2   1   19.79    1.27 
  14   2   1   21.99    1.36 
 -14   2  -1   21.11    0.99 
  16  -2   1   12.00    0.83 
 -16  -2  -1   10.63    1.09 
  16  -2   1    7.95    0.77 
 -16  -2  -1    8.84    0.84 
  16  -2   1   10.70    0.85 
  16  -2   1    9.56    0.59 
 -16  -2  -1    9.52    0.59 
  16  -2   1    9.88    0.80 
 -16  -2  -1    7.55    1.21 
  16  -2   1    9.40    0.89 
 -16  -2  -1    9.72    0.93 
  16  -2   1   10.27    0.68 
 -16  -2  -1    9.94    0.81 
 -16  -2  -1   10.05    1.03 
 -16   2  -1    9.32    0.75 
  16   2   1    9.11    1.02 
 -16   2  -1    8.63    1.24 
  16   2   1   10.22    1.04 
 -16   2  -1   10.33    0.63 
  16   2   1   10.68    1.09 
  16   2   1    9.87    1.03 
 -16   2  -1    9.75    0.81 
  16   2   1    8.29    0.94 
 -16   2  -1   10.59    0.73 
 -16   2  -1   10.50    0.89 
  16   2   1    8.65    1.06 
 -18  -2  -1    0.45    0.75 
 -18  -2  -1   -0.02    0.27 
  18  -2   1    0.58    0.28 
  18  -2   1    0.03    0.54 
 -18  -2  -1    0.40    0.49 
 -18  -2  -1   -0.53    0.57 
  18  -2   1    0.13    0.60 
  18  -2   1    0.34    0.43 
  18  -2   1   -0.11    0.45 
 -18  -2  -1   -0.21    0.38 
 -18  -2  -1    0.54    0.58 
 -18  -2  -1    0.45    0.50 
  18  -2   1    0.11    0.45 
  18   2   1    0.86    0.66 
 -18   2  -1    0.42    0.41 
 -18   2  -1    0.14    0.42 
 -18   2  -1    0.26    0.41 
 -18   2  -1   -0.13    0.48 
 -18   2  -1   -0.44    0.66 
  18   2   1    0.72    0.68 
 -18   2  -1    0.08    0.30 
  18   2   1    0.16    0.54 
 -20  -2  -1    1.86    0.63 
 -20  -2  -1    2.53    0.67 
 -20  -2  -1    1.82    0.95 
 -20  -2  -1    1.02    0.70 
  20  -2   1    1.40    0.60 
 -20  -2  -1    1.96    0.48 
  20  -2   1    2.29    0.68 
 -20  -2  -1    1.75    0.81 
  20  -2   1    1.82    0.76 
 -20   2  -1    1.79    0.61 
 -20   2  -1    2.32    0.52 
 -20   2  -1    1.48    0.66 
  20   2   1    0.39    0.73 
  20   2   1    1.95    0.81 
 -20   2  -1    1.72    0.42 
 -20   2  -1    1.90    0.58 
 -20   2  -1    1.32    0.95 
  22  -2   1    8.93    1.26 
 -22  -2  -1    7.76    1.08 
  22  -2   1    8.78    1.11 
 -22  -2  -1    6.44    1.22 
 -22  -2  -1    8.17    1.45 
  22  -2   1    6.39    1.25 
 -22  -2  -1    9.08    2.11 
  22   2   1   10.26    1.35 
 -22   2  -1    9.47    1.20 
 -22   2  -1    9.45    0.79 
 -22   2  -1    8.23    1.06 
 -22   2  -1    8.18    1.03 
 -22   2  -1    5.88    1.49 
  22   2   1   10.81    1.55 
 -24  -2  -1   12.61    1.79 
 -24  -2  -1   13.02    1.39 
  24  -2   1   15.00    1.77 
  24  -2   1   13.70    1.58 
 -24  -2  -1   13.40    1.67 
 -24   2  -1   13.78    0.97 
 -24   2  -1   13.43    1.54 
  24   2   1   13.66    1.94 
  24   2   1   11.86    1.97 
 -24   2  -1   13.01    1.92 
 -25  -3   1    3.06    1.11 
 -25  -3   1    2.41    0.91 
  25  -3  -1    0.95    0.87 
 -25  -3   1    2.77    1.12 
  25  -3  -1    1.37    0.96 
  25   3  -1    1.80    1.09 
 -25   3   1    2.40    1.43 
 -25   3   1    2.40    0.95 
  23  -3  -1   -0.36    0.65 
  23  -3  -1    0.48    0.78 
 -23  -3   1   -0.31    0.74 
 -23  -3   1    0.34    0.77 
 -23  -3   1    0.51    0.99 
 -23  -3   1   -0.38    0.65 
  23   3  -1    0.39    0.89 
 -23   3   1    0.05    0.69 
 -23   3   1   -0.07    0.86 
  23   3  -1    1.07    0.90 
 -23   3   1    0.09    0.30 
 -21  -3   1    0.30    0.83 
  21  -3  -1    1.11    0.57 
  21  -3  -1    0.47    0.60 
 -21  -3   1    0.57    0.78 
 -21  -3   1    1.68    0.69 
 -21  -3   1    0.30    0.69 
  21  -3  -1    1.05    0.71 
 -21   3   1    0.55    0.89 
 -21   3   1    0.56    0.46 
 -21   3   1    1.56    0.33 
  21   3  -1    0.27    0.79 
  21   3  -1    1.17    0.84 
 -21   3   1    0.85    0.41 
 -21   3   1    0.17    0.62 
  21   3  -1    0.62    0.73 
 -19  -3   1    3.60    0.45 
 -19  -3   1    5.16    0.84 
  19  -3  -1    4.45    0.72 
 -19  -3   1    5.53    1.08 
  19  -3  -1    5.41    0.77 
 -19  -3   1    3.57    0.92 
 -19  -3   1    5.12    1.36 
 -19  -3   1    3.02    0.82 
  19  -3  -1    3.61    0.91 
 -19  -3   1    4.58    0.46 
  19  -3  -1    3.50    0.74 
 -19   3   1    4.37    0.67 
 -19   3   1    5.39    0.90 
  19   3  -1    4.87    1.16 
  19   3  -1    5.69    1.08 
 -19   3   1    3.67    0.98 
  19   3  -1    4.20    1.07 
 -19   3   1    4.89    0.46 
 -19   3   1    4.07    0.69 
 -19   3   1    4.46    0.58 
  17  -3  -1    1.96    0.48 
 -17  -3   1    1.70    0.67 
 -17  -3   1    1.72    0.65 
  17  -3  -1    0.93    0.41 
  17  -3  -1    1.49    0.30 
 -17  -3   1    1.92    0.55 
  17  -3  -1    1.78    0.47 
 -17  -3   1    2.05    0.56 
 -17  -3   1    0.79    0.72 
 -17  -3   1    1.08    0.53 
 -17  -3   1    1.84    0.38 
  17  -3  -1    1.80    0.57 
  17  -3  -1    1.30    0.41 
  17   3  -1    2.03    0.71 
 -17   3   1    1.08    0.66 
  17   3  -1    1.16    0.67 
 -17   3   1    2.60    0.62 
 -17   3   1    0.84    0.43 
  17   3  -1    2.15    0.74 
  17   3  -1    2.20    0.72 
 -17   3   1    1.65    0.34 
  17   3  -1    1.20    0.61 
 -17   3   1    1.80    0.41 
 -17   3   1    1.42    0.32 
  17   3  -1    1.37    0.58 
 -15  -3   1    7.88    0.92 
 -15  -3   1    9.68    0.78 
  15  -3  -1    9.58    0.76 
 -15  -3   1    8.71    0.97 
  15  -3  -1    9.42    0.61 
  15  -3  -1    7.25    0.67 
 -15  -3   1    8.35    1.03 
 -15  -3   1    9.88    0.57 
  15  -3  -1    8.62    0.54 
  15  -3  -1    8.38    0.86 
  15  -3  -1    8.12    0.60 
 -15  -3   1    9.13    0.89 
 -15  -3   1    8.59    0.70 
  15  -3  -1    7.47    0.96 
 -15  -3   1    7.40    1.18 
  15   3  -1    9.47    1.00 
  15   3  -1    7.00    0.96 
 -15   3   1    9.48    1.07 
 -15   3   1    8.71    0.65 
  15   3  -1    8.37    1.08 
  15   3  -1    7.44    0.97 
 -15   3   1    9.12    0.73 
 -15   3   1    9.77    0.47 
  15   3  -1    7.71    1.05 
 -15   3   1   11.11    0.84 
  15   3  -1    9.37    1.08 
 -15   3   1    8.31    0.55 
 -13  -3   1   82.43    3.19 
 -13  -3   1   82.47    3.16 
  13  -3  -1   80.84    2.75 
 -13  -3   1   76.04    2.94 
  13  -3  -1   81.32    2.98 
  13  -3  -1   78.17    3.16 
 -13  -3   1   79.11    3.17 
 -13  -3   1   82.71    3.50 
  13  -3  -1   81.32    2.86 
  13  -3  -1   79.97    2.79 
  13  -3  -1   81.55    3.03 
 -13  -3   1   82.56    3.29 
 -13   3   1   81.12    2.92 
  13   3  -1   79.84    3.26 
 -13   3   1   78.34    3.24 
  13   3  -1   78.24    3.21 
  13   3  -1   75.75    3.20 
 -13   3   1   78.33    3.01 
 -13   3   1   79.55    2.81 
  13   3  -1   77.82    3.14 
 -13   3   1   75.47    2.71 
  13   3  -1   80.68    3.20 
  13   3  -1   82.15    3.71 
 -13   3   1   78.62    2.66 
  13   3  -1   87.03    3.34 
  13   3  -1   84.29    3.22 
 -11  -3   1    0.19    0.39 
  11  -3  -1    0.10    0.26 
 -11  -3   1    0.67    0.45 
  11  -3  -1    0.11    0.20 
 -11  -3   1    0.06    0.34 
  11  -3  -1    0.06    0.32 
 -11  -3   1   -0.05    0.31 
 -11  -3   1    0.43    0.38 
 -11  -3   1    0.48    0.41 
  11  -3  -1   -0.13    0.28 
  11  -3  -1   -0.13    0.18 
 -11   3   1   -0.20    0.28 
  11   3  -1    0.18    0.40 
 -11   3   1   -0.21    0.34 
  11   3  -1   -0.04    0.36 
  11   3  -1    0.12    0.41 
  11   3  -1    0.79    0.43 
 -11   3   1    0.20    0.31 
  11   3  -1    0.38    0.37 
 -11   3   1    0.24    0.37 
  11   3  -1   -0.10    0.38 
 -11   3   1   -0.36    0.18 
  11   3  -1   -0.37    0.36 
  11   3  -1    0.16    0.39 
  -9  -3   1    0.83    0.35 
  -9  -3   1    0.89    0.35 
   9  -3  -1    0.93    0.20 
   9  -3  -1    0.86    0.31 
  -9  -3   1    1.12    0.42 
   9  -3  -1    0.69    0.31 
  -9  -3   1    0.75    0.41 
  -9  -3   1    1.31    0.45 
   9  -3  -1    0.84    0.24 
  -9  -3   1    0.09    0.33 
   9  -3  -1    0.80    0.30 
   9   3  -1    1.40    0.40 
   9   3  -1    0.63    0.39 
  -9   3   1    0.40    0.33 
  -9   3   1    0.97    0.23 
   9   3  -1    0.31    0.37 
  -9   3   1    0.34    0.36 
   9   3  -1    1.17    0.43 
   9   3  -1    1.32    0.41 
  -9   3   1    0.67    0.31 
   9   3  -1    1.02    0.44 
  -9   3   1    0.51    0.28 
   9   3  -1    0.24    0.35 
   9   3  -1    0.81    0.42 
  -7  -3   1    5.75    0.67 
  -7  -3   1    6.01    0.62 
  -7  -3   1    7.07    0.66 
  -7  -3   1    6.28    0.68 
   7  -3  -1    6.62    0.52 
  -7  -3   1    6.09    0.61 
   7  -3  -1    5.88    0.35 
   7  -3  -1    5.47    0.45 
   7  -3  -1    6.77    0.47 
  -7  -3   1    6.81    0.61 
  -7  -3   1    6.97    0.72 
   7   3  -1    6.16    0.66 
   7   3  -1    6.05    0.55 
  -7   3   1    5.73    0.61 
   7   3  -1    6.45    0.69 
   7   3  -1    6.69    0.57 
   7   3  -1    7.67    0.68 
   7   3  -1    6.81    0.72 
  -7   3   1    6.58    0.53 
  -7   3   1    6.61    0.54 
   7   3  -1    4.81    0.65 
   7   3  -1    6.18    0.66 
  -5  -3   1    8.64    0.65 
  -5  -3   1    7.67    0.66 
  -5  -3   1    8.41    0.62 
  -5  -3   1    8.69    0.65 
   5  -3  -1    8.11    0.47 
   5  -3  -1    7.41    0.48 
   5  -3  -1    8.42    0.36 
  -5  -3   1    9.08    0.66 
  -5  -3   1    9.53    0.62 
   5  -3  -1    9.23    0.38 
   5  -3  -1    7.29    0.33 
  -5  -3   1    7.93    0.55 
  -5  -3   1    8.97    0.68 
   5  -3  -1    7.75    0.38 
   5  -3  -1    8.19    0.52 
   5   3  -1    8.44    0.65 
   5   3  -1    9.40    0.69 
  -5   3   1    8.33    0.64 
   5   3  -1    8.33    0.68 
   5   3  -1    8.55    0.66 
  -5   3   1    8.04    0.39 
  -5   3   1    8.83    0.57 
   5   3  -1    8.33    0.66 
   5   3  -1    8.47    0.49 
   5   3  -1    8.91    0.59 
  -5   3   1    7.60    0.41 
   5   3  -1    8.28    0.59 
   5   3  -1    7.47    0.68 
   3  -3  -1  107.95    3.70 
   3  -3  -1  111.19    3.71 
  -3  -3   1  113.40    3.90 
  -3  -3   1  108.91    3.80 
  -3  -3   1  109.58    3.81 
   3  -3  -1  107.24    3.69 
   3  -3  -1  113.28    3.73 
  -3  -3   1  114.00    3.89 
  -3  -3   1  116.34    3.93 
  -3  -3   1  108.79    3.90 
  -3  -3   1  112.40    3.78 
  -3  -3   1  112.44    3.91 
   3  -3  -1  111.59    3.81 
   3  -3  -1  111.08    3.88 
   3  -3  -1  109.29    3.73 
  -3  -3   1  114.76    3.85 
  -3  -3   1  107.28    3.71 
  -3   3   1  111.19    3.89 
   3   3  -1  110.13    3.80 
   3   3  -1  114.08    3.89 
   3   3  -1  112.56    3.90 
   3   3  -1  111.67    3.78 
  -3   3   1  113.32    3.65 
  -3   3   1  106.57    3.72 
   3   3  -1  107.26    3.72 
   3   3  -1  107.82    3.82 
   3   3  -1  109.32    3.88 
  -3   3   1  106.57    3.72 
   3   3  -1  112.61    3.90 
  -1  -3   1  387.35   12.48 
   1  -3  -1  382.94   12.45 
  -1  -3   1  376.91   12.48 
   1  -3  -1  380.15   12.33 
  -1  -3   1  380.52   12.48 
   1  -3  -1  375.29   12.39 
   1  -3  -1  366.88   12.39 
  -1  -3   1  378.60   12.38 
   1  -3  -1  388.22   12.43 
  -1  -3   1  380.03   12.46 
   1  -3  -1  385.45   12.43 
  -1  -3   1  378.90   12.34 
  -1  -3   1  378.20   12.43 
  -1  -3   1  396.66   12.37 
  -1  -3   1  389.16   12.47 
   1  -3  -1  380.65   12.29 
   1  -3  -1  373.55   12.41 
   1  -3  -1  376.63   12.46 
  -1  -3   1  383.75   12.41 
   1   3  -1  382.34   12.34 
  -1   3   1  369.93   12.31 
   1   3  -1  374.36   12.33 
   1   3  -1  374.62   12.40 
   1   3  -1  385.32   12.45 
  -1   3   1  378.82   12.42 
   1   3  -1  381.16   12.48 
   1   3  -1  384.05   12.46 
   1   3  -1  388.87   12.47 
  -1   3   1  367.29   12.40 
  -1   3   1  372.19   12.47 
  -1   3   1  381.93   12.40 
   1   3  -1  378.11   12.37 
   1   3  -1  378.01   12.45 
  -1   3   1  369.74   12.40 
   1  -3   1   11.10    0.45 
  -1  -3  -1   10.13    0.62 
   1  -3   1   10.40    0.58 
  -1  -3  -1   11.30    0.68 
  -1  -3  -1   10.44    0.59 
   1  -3   1   11.09    0.63 
   1  -3   1   10.53    0.60 
  -1  -3  -1   11.65    0.59 
  -1  -3  -1   10.90    0.66 
  -1  -3  -1   11.82    0.64 
   1  -3   1    9.96    0.59 
  -1  -3  -1   10.57    0.54 
   1  -3   1   11.31    0.50 
   1  -3   1   10.44    0.61 
   1  -3   1   10.46    0.58 
  -1  -3  -1   11.00    0.65 
   1  -3   1   11.81    0.63 
   1   3   1   10.89    0.67 
   1   3   1   10.25    0.61 
  -1   3  -1   10.44    0.62 
  -1   3  -1   11.18    0.67 
   1   3   1   11.11    0.67 
  -1   3  -1    9.88    0.59 
   1   3   1   10.41    0.62 
   1   3   1   10.18    0.54 
  -1   3  -1   10.90    0.56 
   1   3   1   11.76    0.68 
  -1   3  -1   11.41    0.63 
  -1   3  -1   10.75    0.45 
   1   3   1   10.44    0.64 
   1   3   1   10.56    0.54 
  -3  -3  -1    8.33    0.55 
  -3  -3  -1    8.16    0.58 
  -3  -3  -1    7.92    0.62 
   3  -3   1    8.11    0.50 
  -3  -3  -1    7.46    0.58 
   3  -3   1    8.31    0.45 
  -3  -3  -1    7.72    0.61 
  -3  -3  -1    9.22    0.52 
  -3  -3  -1    7.71    0.59 
  -3  -3  -1    8.35    0.59 
   3  -3   1    7.61    0.44 
   3  -3   1    7.33    0.34 
   3  -3   1    8.55    0.42 
  -3  -3  -1    8.42    0.47 
   3  -3   1    7.41    0.45 
   3  -3   1    8.17    0.57 
  -3   3  -1    7.47    0.56 
   3   3   1    7.98    0.63 
  -3   3  -1    7.65    0.44 
  -3   3  -1    8.48    0.36 
   3   3   1    8.04    0.61 
   3   3   1    7.66    0.52 
  -3   3  -1    7.69    0.41 
  -3   3  -1    7.95    0.58 
   3   3   1    7.46    0.51 
   3   3   1    6.71    0.58 
   3   3   1    7.03    0.51 
  -3   3  -1    7.58    0.46 
   3   3   1    8.66    0.64 
  -5  -3  -1   17.79    0.97 
  -5  -3  -1   19.20    0.98 
   5  -3   1   18.86    0.68 
   5  -3   1   18.95    0.74 
  -5  -3  -1   18.54    1.02 
  -5  -3  -1   18.96    0.92 
   5  -3   1   19.81    0.71 
   5  -3   1   19.18    0.73 
  -5  -3  -1   16.06    0.96 
   5  -3   1   18.81    0.74 
  -5  -3  -1   18.83    0.89 
   5  -3   1   18.77    0.77 
  -5  -3  -1   17.89    0.93 
  -5  -3  -1   19.08    1.02 
   5  -3   1   17.80    0.83 
   5  -3   1   19.39    0.85 
  -5  -3  -1   20.62    1.01 
   5   3   1   17.54    0.96 
  -5   3  -1   17.49    0.95 
   5   3   1   19.58    1.02 
  -5   3  -1   19.43    0.75 
  -5   3  -1   17.92    0.72 
   5   3   1   18.02    1.00 
   5   3   1   19.32    0.85 
   5   3   1   20.06    1.05 
  -5   3  -1   17.70    0.80 
   5   3   1   19.30    1.02 
   5   3   1   17.55    0.91 
   5   3   1   18.39    0.92 
   5   3   1   19.33    1.00 
  -5   3  -1   19.20    0.90 
   7  -3   1    2.09    0.35 
  -7  -3  -1    2.35    0.51 
   7  -3   1    2.59    0.20 
   7  -3   1    2.32    0.21 
  -7  -3  -1    2.06    0.44 
   7  -3   1    1.79    0.42 
  -7  -3  -1    2.39    0.55 
  -7  -3  -1    1.83    0.46 
   7  -3   1    2.28    0.31 
   7  -3   1    2.27    0.37 
   7  -3   1    1.85    0.32 
  -7  -3  -1    2.35    0.43 
  -7  -3  -1    1.20    0.44 
  -7  -3  -1    2.06    0.43 
  -7   3  -1    2.52    0.21 
  -7   3  -1    2.49    0.42 
   7   3   1    1.98    0.43 
  -7   3  -1    2.19    0.44 
   7   3   1    2.46    0.49 
   7   3   1    3.62    0.58 
  -7   3  -1    1.78    0.43 
   7   3   1    2.20    0.47 
   7   3   1    2.55    0.49 
   7   3   1    3.09    0.56 
   7   3   1    1.58    0.44 
  -7   3  -1    2.71    0.24 
   7   3   1    2.45    0.53 
  -9  -3  -1   29.80    1.44 
   9  -3   1   26.48    1.14 
   9  -3   1   26.67    1.25 
   9  -3   1   26.65    0.95 
  -9  -3  -1   26.01    1.32 
  -9  -3  -1   26.40    1.33 
   9  -3   1   26.29    1.09 
   9  -3   1   26.50    1.24 
  -9  -3  -1   25.46    1.32 
  -9  -3  -1   28.72    1.53 
   9  -3   1   25.57    0.98 
  -9  -3  -1   26.89    1.34 
   9   3   1   26.33    1.43 
   9   3   1   27.25    1.40 
  -9   3  -1   25.66    0.97 
   9   3   1   27.60    1.38 
   9   3   1   25.30    1.42 
  -9   3  -1   25.60    1.31 
   9   3   1   27.71    1.34 
   9   3   1   24.34    1.34 
   9   3   1   27.45    1.41 
  -9   3  -1   26.93    1.18 
  -9   3  -1   26.61    0.97 
  -9   3  -1   26.41    0.96 
   9   3   1   28.08    1.32 
 -11  -3  -1   41.18    1.90 
 -11  -3  -1   43.19    1.88 
  11  -3   1   45.16    1.63 
 -11  -3  -1   45.92    2.03 
  11  -3   1   41.74    1.73 
  11  -3   1   43.27    1.52 
  11  -3   1   40.81    1.56 
  11  -3   1   44.29    1.81 
 -11  -3  -1   49.13    1.99 
  11  -3   1   42.23    1.85 
 -11  -3  -1   41.23    1.85 
 -11  -3  -1   47.47    2.21 
  11   3   1   39.92    1.96 
  11   3   1   42.40    2.00 
 -11   3  -1   43.05    1.50 
  11   3   1   44.88    2.05 
  11   3   1   42.01    1.92 
 -11   3  -1   42.30    1.96 
  11   3   1   43.79    1.97 
  11   3   1   40.23    2.04 
 -11   3  -1   41.44    1.54 
 -11   3  -1   41.39    1.72 
 -11   3  -1   44.57    1.56 
  11   3   1   41.19    1.94 
  11   3   1   41.13    1.88 
 -11   3  -1   42.72    1.77 
 -13  -3  -1    3.19    0.72 
 -13  -3  -1    3.66    0.63 
 -13  -3  -1    2.98    0.59 
  13  -3   1    2.31    0.55 
 -13  -3  -1    4.01    0.91 
 -13  -3  -1    3.76    0.54 
  13  -3   1    3.14    0.59 
 -13  -3  -1    2.88    0.63 
  13  -3   1    2.94    0.38 
 -13  -3  -1    3.81    0.63 
  13  -3   1    2.90    0.38 
  13  -3   1    3.26    0.53 
  13  -3   1    2.37    0.42 
  13   3   1    3.32    0.70 
  13   3   1    3.75    0.79 
 -13   3  -1    2.17    0.61 
  13   3   1    3.21    0.78 
 -13   3  -1    3.33    0.60 
 -13   3  -1    2.76    0.42 
 -13   3  -1    3.83    0.55 
  13   3   1    2.50    0.58 
  13   3   1    3.15    0.83 
  13   3   1    2.36    0.62 
 -13   3  -1    3.70    0.32 
 -13   3  -1    2.96    0.40 
  15  -3   1    0.89    0.46 
 -15  -3  -1    1.31    0.33 
 -15  -3  -1    1.38    0.48 
  15  -3   1    0.65    0.32 
 -15  -3  -1    0.70    0.55 
 -15  -3  -1    1.51    0.46 
  15  -3   1    0.86    0.26 
  15  -3   1    1.06    0.42 
  15  -3   1    0.98    0.35 
 -15  -3  -1    1.49    0.67 
 -15  -3  -1    1.12    0.56 
  15  -3   1    0.53    0.51 
 -15  -3  -1    0.49    0.47 
  15   3   1    0.51    0.54 
 -15   3  -1    1.11    0.47 
 -15   3  -1    0.85    0.30 
  15   3   1    1.62    0.57 
  15   3   1    1.52    0.60 
 -15   3  -1    0.94    0.23 
 -15   3  -1    0.82    0.42 
 -15   3  -1    0.49    0.57 
  15   3   1    0.31    0.56 
  15   3   1    0.59    0.53 
 -15   3  -1    0.92    0.33 
  15   3   1    0.97    0.63 
 -17  -3  -1   -0.06    0.59 
 -17  -3  -1   -0.12    0.67 
  17  -3   1    0.80    0.38 
 -17  -3  -1    0.38    0.57 
 -17  -3  -1    0.34    0.31 
 -17  -3  -1    0.21    0.45 
  17  -3   1    1.03    0.54 
 -17  -3  -1    0.37    0.50 
 -17  -3  -1    1.01    0.51 
  17  -3   1   -0.13    0.35 
  17  -3   1    0.81    0.41 
  17  -3   1    0.72    0.30 
  17  -3   1    0.71    0.47 
 -17   3  -1   -0.55    0.39 
  17   3   1    1.40    0.70 
 -17   3  -1    0.20    0.33 
  17   3   1    0.86    0.60 
 -17   3  -1    0.74    0.51 
 -17   3  -1    0.76    0.26 
 -17   3  -1    0.75    0.72 
 -17   3  -1    0.35    0.35 
  17   3   1    1.19    0.69 
  17   3   1    0.68    0.61 
  19  -3   1   10.40    0.95 
 -19  -3  -1    9.24    1.25 
 -19  -3  -1    8.19    1.34 
  19  -3   1    9.34    0.93 
 -19  -3  -1    8.02    1.45 
 -19  -3  -1    8.58    0.63 
 -19  -3  -1   10.08    1.00 
  19  -3   1    9.24    1.04 
 -19  -3  -1    9.14    1.19 
 -19   3  -1    7.14    1.00 
 -19   3  -1   10.07    0.63 
  19   3   1   11.05    1.25 
  19   3   1   10.31    1.40 
 -19   3  -1    9.21    0.83 
 -19   3  -1    8.94    0.89 
 -19   3  -1    7.31    0.77 
 -19   3  -1   10.11    1.44 
 -21  -3  -1    9.02    1.64 
 -21  -3  -1   10.11    1.32 
  21  -3   1    9.04    1.10 
 -21  -3  -1   12.66    1.22 
  21  -3   1    7.48    1.12 
 -21  -3  -1    9.04    1.37 
  21  -3   1    8.10    1.05 
  21   3   1    7.32    1.55 
  21   3   1    8.48    1.31 
 -21   3  -1    9.59    1.10 
 -21   3  -1    8.83    1.63 
 -21   3  -1    8.49    0.89 
 -21   3  -1    9.52    0.67 
  23  -3   1    4.66    1.09 
  23  -3   1    6.57    1.20 
 -23  -3  -1    6.13    1.37 
 -23  -3  -1    4.64    1.11 
 -23  -3  -1    4.94    1.06 
  23   3   1    6.03    1.34 
 -23   3  -1    4.72    1.27 
  23   3   1    4.14    1.23 
 -23   3  -1    6.18    0.63 
 -23   3  -1    5.68    1.09 
 -25  -3  -1    0.50    0.81 
  25  -3   1    0.40    0.97 
 -25   3  -1    0.09    1.06 
  25   3   1    1.16    1.10 
 -25   3  -1    0.20    0.82 
 -24  -4   1    1.99    0.99 
 -24  -4   1    0.46    0.76 
  24  -4  -1    2.45    0.96 
 -24   4   1    1.46    1.21 
  24   4  -1    2.58    1.25 
  24   4  -1    1.49    1.09 
 -22  -4   1    3.71    0.90 
  22  -4  -1    2.80    0.73 
 -22  -4   1    2.01    1.35 
 -22  -4   1    2.33    0.96 
 -22  -4   1    1.95    0.90 
  22  -4  -1    3.98    1.01 
 -22   4   1    1.97    0.78 
  22   4  -1    0.81    1.09 
  22   4  -1    3.86    1.07 
 -22   4   1    3.85    1.20 
 -20  -4   1   16.53    1.87 
  20  -4  -1   14.17    1.24 
 -20  -4   1   14.67    1.48 
 -20  -4   1   17.54    1.34 
  20  -4  -1   17.30    1.10 
  20  -4  -1   16.60    1.19 
 -20  -4   1   15.80    1.59 
 -20   4   1   15.08    1.27 
  20   4  -1   15.49    1.61 
  20   4  -1   16.23    1.57 
 -20   4   1   16.32    1.68 
  20   4  -1   16.03    1.55 
  18  -4  -1   19.71    1.37 
  18  -4  -1   21.19    1.24 
 -18  -4   1   19.46    1.84 
 -18  -4   1   19.42    0.97 
  18  -4  -1   20.54    1.10 
  18  -4  -1   19.91    0.99 
 -18  -4   1   20.82    1.32 
  18  -4  -1   21.32    1.07 
 -18  -4   1   21.11    1.53 
 -18  -4   1   20.73    1.56 
 -18  -4   1   22.58    1.66 
 -18  -4   1   19.35    1.45 
  18   4  -1   19.15    1.51 
 -18   4   1   19.09    1.21 
 -18   4   1   20.87    1.38 
 -18   4   1   18.71    1.61 
  18   4  -1   19.99    1.63 
  18   4  -1   24.67    1.73 
  18   4  -1   17.65    1.56 
 -18   4   1   21.61    1.00 
 -16  -4   1   48.71    2.32 
 -16  -4   1   52.07    2.71 
  16  -4  -1   42.60    1.81 
  16  -4  -1   43.96    2.20 
  16  -4  -1   47.23    2.05 
 -16  -4   1   44.14    2.24 
  16  -4  -1   45.86    1.75 
 -16  -4   1   48.11    2.24 
  16  -4  -1   45.29    1.79 
  16  -4  -1   47.46    1.76 
 -16  -4   1   48.33    2.40 
  16  -4  -1   46.81    2.07 
  16   4  -1   49.81    2.37 
 -16   4   1   48.36    2.33 
  16   4  -1   42.89    2.32 
  16   4  -1   48.72    2.48 
 -16   4   1   46.69    1.75 
  16   4  -1   43.70    2.29 
  16   4  -1   43.27    2.26 
 -16   4   1   47.34    1.99 
 -16   4   1   47.30    2.08 
  14  -4  -1    0.45    0.27 
 -14  -4   1    0.48    0.53 
 -14  -4   1    0.07    0.51 
 -14  -4   1    0.17    0.47 
  14  -4  -1    0.29    0.42 
  14  -4  -1    0.28    0.24 
 -14  -4   1    0.20    0.50 
  14  -4  -1    0.89    0.40 
 -14  -4   1    0.64    0.60 
  14  -4  -1    0.13    0.38 
  14   4  -1   -0.11    0.50 
 -14   4   1    0.40    0.41 
  14   4  -1    0.65    0.59 
  14   4  -1    1.24    0.99 
  14   4  -1    0.09    0.53 
 -14   4   1    0.21    0.23 
  14   4  -1   -0.14    0.48 
 -14   4   1    0.08    0.46 
  14   4  -1    0.28    0.51 
 -12  -4   1   15.12    1.11 
  12  -4  -1   13.64    0.86 
 -12  -4   1   15.83    1.09 
 -12  -4   1   14.11    1.24 
 -12  -4   1   12.22    1.13 
  12  -4  -1   12.94    0.67 
  12  -4  -1   15.14    0.96 
  12  -4  -1   12.78    0.92 
 -12  -4   1   13.16    1.05 
  12  -4  -1   13.91    0.75 
 -12   4   1   13.93    1.01 
  12   4  -1   15.40    1.08 
  12   4  -1   13.91    1.19 
 -12   4   1   14.69    1.02 
 -12   4   1   13.76    0.90 
  12   4  -1   13.22    1.15 
  12   4  -1   12.77    1.11 
  12   4  -1   12.10    1.13 
  12   4  -1   11.50    1.14 
  12   4  -1   13.19    1.14 
  10  -4  -1   35.45    1.62 
  10  -4  -1   35.55    1.43 
 -10  -4   1   37.34    1.88 
 -10  -4   1   37.78    1.70 
 -10  -4   1   35.92    1.80 
  10  -4  -1   34.09    1.52 
 -10  -4   1   36.64    1.71 
 -10  -4   1   35.48    1.74 
  10  -4  -1   33.49    1.44 
 -10  -4   1   34.40    1.72 
  10  -4  -1   34.50    1.28 
  10   4  -1   34.91    1.79 
 -10   4   1   31.43    1.51 
  10   4  -1   36.60    1.66 
  10   4  -1   35.74    1.77 
 -10   4   1   36.04    1.56 
  10   4  -1   32.78    1.63 
  10   4  -1   33.45    1.77 
 -10   4   1   34.88    1.69 
  10   4  -1   34.15    1.76 
  10   4  -1   34.94    1.75 
  10   4  -1   34.27    1.75 
   8  -4  -1    7.31    0.38 
  -8  -4   1    6.64    0.71 
   8  -4  -1    6.27    0.53 
  -8  -4   1    8.33    0.81 
  -8  -4   1    7.96    0.82 
  -8  -4   1    6.87    0.75 
  -8  -4   1    7.37    0.74 
   8  -4  -1    7.61    0.56 
  -8  -4   1    6.43    0.77 
   8   4  -1    7.00    0.78 
  -8   4   1    6.08    0.65 
  -8   4   1    7.16    0.73 
   8   4  -1    6.56    0.67 
   8   4  -1    6.83    0.80 
   8   4  -1    7.49    0.69 
   8   4  -1    5.88    0.78 
   8   4  -1    8.10    0.84 
   8   4  -1    6.70    0.78 
   8   4  -1    6.73    0.80 
  -6  -4   1   12.23    0.90 
  -6  -4   1   11.80    0.91 
   6  -4  -1   11.64    0.58 
   6  -4  -1   12.14    0.61 
  -6  -4   1   13.49    0.83 
   6  -4  -1   11.64    0.71 
   6  -4  -1   11.73    0.48 
  -6  -4   1   12.67    0.84 
   6  -4  -1   11.41    0.55 
   6  -4  -1   12.37    0.57 
   6  -4  -1   12.58    0.67 
  -6  -4   1   11.40    0.84 
  -6  -4   1   10.78    0.84 
  -6  -4   1   11.44    0.86 
   6  -4  -1   10.41    0.47 
   6  -4  -1   11.89    0.47 
   6   4  -1   11.58    0.90 
   6   4  -1   11.93    0.77 
   6   4  -1   12.10    0.89 
   6   4  -1   12.15    0.91 
   6   4  -1   12.28    0.89 
   6   4  -1   10.92    0.76 
   6   4  -1   11.65    0.65 
   6   4  -1   10.10    0.81 
   6   4  -1   10.53    0.87 
  -6   4   1   11.23    0.58 
  -6   4   1   10.87    0.54 
  -6   4   1   11.69    0.85 
  -4  -4   1    2.22    0.53 
  -4  -4   1    1.51    0.40 
  -4  -4   1    1.42    0.31 
  -4  -4   1    1.34    0.36 
   4  -4  -1    1.52    0.23 
   4  -4  -1    1.25    0.33 
   4  -4  -1    0.94    0.26 
  -4  -4   1    1.39    0.38 
  -4  -4   1    1.78    0.39 
   4  -4  -1    1.17    0.26 
  -4  -4   1    1.11    0.27 
   4  -4  -1    1.15    0.21 
   4  -4  -1    1.26    0.28 
   4  -4  -1    1.15    0.24 
  -4  -4   1    1.13    0.34 
   4  -4  -1    1.19    0.22 
  -4  -4   1    1.20    0.33 
  -4  -4   1    1.65    0.42 
   4   4  -1    0.85    0.41 
  -4   4   1    1.32    0.27 
   4   4  -1    2.45    0.53 
   4   4  -1    1.17    0.31 
   4   4  -1    1.61    0.41 
   4   4  -1    1.29    0.33 
   4   4  -1    1.47    0.39 
  -4   4   1    1.03    0.38 
   4   4  -1    1.59    0.34 
   4   4  -1    1.44    0.28 
   4   4  -1    0.33    0.22 
  -4   4   1    0.88    0.25 
  -4   4   1    0.85    0.19 
  -2  -4   1   21.10    0.91 
   2  -4  -1   18.24    0.92 
   2  -4  -1   20.91    0.86 
  -2  -4   1   20.89    1.04 
  -2  -4   1   21.79    0.98 
  -2  -4   1   22.22    1.08 
   2  -4  -1   19.98    0.78 
  -2  -4   1   19.47    0.81 
  -2  -4   1   20.46    0.99 
   2  -4  -1   20.44    0.92 
   2  -4  -1   20.08    1.00 
   2  -4  -1   19.31    0.94 
  -2  -4   1   19.79    1.09 
   2  -4  -1   20.77    0.98 
  -2  -4   1   21.54    1.06 
   2  -4  -1   20.59    0.84 
   2  -4  -1   21.22    0.98 
  -2  -4   1   22.01    1.08 
  -2  -4   1   22.02    0.96 
  -2   4   1   20.59    0.97 
   2   4  -1   20.46    0.94 
  -2   4   1   20.83    1.06 
  -2   4   1   19.99    0.91 
   2   4  -1   22.77    1.09 
   2   4  -1   20.06    0.90 
  -2   4   1   20.53    0.91 
   2   4  -1   20.13    1.02 
   2   4  -1   20.19    0.91 
   2   4  -1   20.70    1.05 
  -2   4   1   20.61    0.98 
   2   4  -1   22.33    0.96 
   2   4  -1   20.63    1.07 
   2   4  -1   22.53    1.12 
   0  -4  -1   65.02    2.50 
   0  -4  -1   70.31    2.51 
   0  -4   1   69.72    2.49 
   0  -4   1   68.36    2.51 
   0  -4   1   65.65    2.32 
   0  -4  -1   69.50    2.35 
   0  -4  -1   64.60    2.44 
   0  -4   1   70.01    2.49 
   0  -4  -1   63.78    2.46 
   0  -4  -1   64.37    2.35 
   0  -4  -1   68.49    2.51 
   0  -4  -1   66.07    2.50 
   0  -4   1   72.06    2.31 
   0  -4   1   66.39    2.37 
   0  -4   1   68.88    2.49 
   0  -4   1   64.33    2.45 
   0  -4   1   65.47    2.50 
   0  -4   1   66.72    2.46 
   0  -4  -1   69.14    2.40 
   0   4  -1   65.24    2.26 
   0   4  -1   63.67    2.49 
   0   4   1   68.49    2.50 
   0   4   1   67.51    2.45 
   0   4  -1   66.37    2.47 
   0   4  -1   65.24    2.30 
   0   4   1   68.29    2.48 
   0   4  -1   65.53    2.45 
   0   4   1   65.88    2.49 
   0   4  -1   66.04    2.48 
   0   4   1   66.56    2.50 
   0   4   1   70.82    2.49 
   0   4   1   63.92    2.33 
   0   4   1   65.31    2.30 
  -2  -4  -1  204.38    7.01 
   2  -4   1  217.71    7.12 
  -2  -4  -1  216.84    7.13 
  -2  -4  -1  212.73    7.12 
   2  -4   1  214.54    7.12 
   2  -4   1  217.05    7.09 
  -2  -4  -1  205.93    7.17 
  -2  -4  -1  206.57    7.22 
   2  -4   1  210.34    7.09 
   2  -4   1  208.65    7.08 
  -2  -4  -1  207.39    7.22 
  -2  -4  -1  215.99    7.21 
   2  -4   1  209.36    6.94 
   2  -4   1  212.46    6.97 
  -2  -4  -1  218.21    7.25 
  -2  -4  -1  211.10    7.08 
   2  -4   1  213.71    7.15 
  -2   4  -1  214.24    7.18 
   2   4   1  211.60    7.22 
   2   4   1  215.05    7.07 
  -2   4  -1  210.75    7.18 
  -2   4  -1  212.04    7.02 
  -2   4  -1  210.09    7.12 
   2   4   1  213.87    7.17 
  -2   4  -1  212.40    7.09 
   2   4   1  214.05    7.08 
   2   4   1  219.59    7.24 
   2   4   1  213.20    7.22 
   2   4   1  216.79    7.14 
   2   4   1  216.54    7.24 
  -2   4  -1  204.13    7.04 
   4  -4   1   17.55    0.76 
  -4  -4  -1   17.40    1.03 
  -4  -4  -1   17.70    0.98 
  -4  -4  -1   17.74    1.02 
  -4  -4  -1   17.86    0.99 
  -4  -4  -1   18.37    1.06 
  -4  -4  -1   17.54    0.99 
   4  -4   1   17.34    0.67 
  -4  -4  -1   17.58    0.94 
   4  -4   1   17.88    0.81 
  -4  -4  -1   17.33    0.84 
   4  -4   1   18.40    0.67 
   4  -4   1   17.77    0.81 
  -4  -4  -1   16.99    0.89 
   4  -4   1   17.44    0.79 
   4  -4   1   17.27    0.89 
   4   4   1   18.76    1.06 
  -4   4  -1   16.57    0.94 
  -4   4  -1   16.28    0.96 
   4   4   1   16.35    0.99 
  -4   4  -1   18.23    0.67 
   4   4   1   17.00    0.92 
  -4   4  -1   17.03    0.80 
   4   4   1   17.96    1.01 
  -4   4  -1   17.81    0.84 
   4   4   1   17.82    1.03 
   4   4   1   16.96    0.89 
   4   4   1   18.36    0.92 
   4   4   1   16.57    1.02 
  -6  -4  -1    0.48    0.33 
   6  -4   1    0.60    0.19 
  -6  -4  -1    0.35    0.34 
   6  -4   1    0.95    0.26 
  -6  -4  -1    1.35    0.39 
  -6  -4  -1    1.22    0.35 
   6  -4   1    0.76    0.19 
   6  -4   1    1.30    0.19 
  -6  -4  -1    1.54    0.44 
   6  -4   1    1.07    0.30 
  -6  -4  -1    0.98    0.38 
   6  -4   1    0.93    0.21 
  -6  -4  -1    1.01    0.41 
  -6  -4  -1    0.78    0.37 
   6   4   1    1.15    0.43 
   6   4   1    1.42    0.40 
  -6   4  -1    1.23    0.40 
  -6   4  -1    1.10    0.20 
  -6   4  -1    0.96    0.39 
   6   4   1    0.69    0.43 
   6   4   1    0.72    0.34 
  -6   4  -1    1.19    0.24 
   6   4   1    0.97    0.43 
   6   4   1    0.43    0.37 
   6   4   1    0.74    0.35 
   6   4   1    1.10    0.43 
   8  -4   1   17.56    1.07 
   8  -4   1   17.46    0.71 
  -8  -4  -1   17.91    1.12 
  -8  -4  -1   16.76    1.08 
   8  -4   1   19.57    0.90 
  -8  -4  -1   16.71    1.07 
   8  -4   1   17.97    0.70 
  -8  -4  -1   17.27    1.17 
   8  -4   1   16.46    0.84 
  -8  -4  -1   18.76    1.19 
  -8  -4  -1   15.02    1.04 
   8  -4   1   16.26    0.79 
   8   4   1   14.90    1.10 
   8   4   1   18.15    1.13 
   8   4   1   21.18    1.25 
   8   4   1   17.94    1.15 
  -8   4  -1   17.29    0.68 
  -8   4  -1   17.42    0.91 
   8   4   1   16.45    1.14 
   8   4   1   15.64    1.00 
  -8   4  -1   16.44    0.97 
  -8   4  -1   18.78    0.75 
   8   4   1   18.56    1.14 
  -8   4  -1   16.65    1.06 
   8   4   1   19.47    1.06 
 -10  -4  -1   40.68    1.93 
  10  -4   1   41.96    1.76 
  10  -4   1   38.85    1.35 
  10  -4   1   36.00    1.60 
  10  -4   1   36.42    1.52 
  10  -4   1   40.09    1.35 
 -10  -4  -1   40.00    1.84 
 -10  -4  -1   36.59    1.78 
 -10  -4  -1   38.89    1.99 
 -10  -4  -1   38.20    1.81 
 -10  -4  -1   39.16    1.83 
  10  -4   1   36.24    1.53 
  10   4   1   35.44    1.85 
 -10   4  -1   39.34    1.38 
  10   4   1   40.39    1.96 
  10   4   1   37.34    1.88 
  10   4   1   39.33    1.87 
  10   4   1   38.07    1.89 
  10   4   1   37.87    1.76 
 -10   4  -1   38.38    1.66 
  10   4   1   39.38    1.78 
 -10   4  -1   37.90    1.35 
  10   4   1   41.46    1.88 
 -10   4  -1   36.78    1.77 
 -10   4  -1   36.51    1.68 
  12  -4   1   50.33    2.12 
  12  -4   1   49.69    2.00 
  12  -4   1   49.95    2.14 
 -12  -4  -1   51.33    2.29 
  12  -4   1   51.54    1.77 
 -12  -4  -1   51.47    2.53 
  12  -4   1   50.97    1.94 
 -12  -4  -1   53.66    2.31 
 -12  -4  -1   53.23    2.30 
 -12  -4  -1   53.77    2.40 
 -12   4  -1   50.40    2.09 
 -12   4  -1   52.94    1.76 
  12   4   1   48.32    2.30 
 -12   4  -1   49.95    2.22 
  12   4   1   49.12    2.29 
  12   4   1   53.17    2.45 
  12   4   1   50.19    2.63 
 -12   4  -1   48.24    1.77 
  12   4   1   53.08    2.38 
  12   4   1   47.15    2.23 
  14  -4   1    0.95    0.43 
 -14  -4  -1    2.19    0.74 
 -14  -4  -1    0.71    0.57 
 -14  -4  -1    0.82    0.50 
  14  -4   1    0.48    0.45 
 -14  -4  -1    1.25    0.53 
 -14  -4  -1    0.62    0.55 
  14  -4   1    0.60    0.24 
  14  -4   1    0.19    0.38 
  14  -4   1    0.34    0.27 
 -14   4  -1    1.21    0.27 
  14   4   1    0.45    0.49 
 -14   4  -1    0.35    0.52 
  14   4   1    0.71    0.62 
 -14   4  -1    0.69    0.45 
 -14   4  -1    0.64    0.23 
  14   4   1    0.61    0.60 
  14   4   1    0.75    0.57 
  14   4   1    0.56    0.54 
 -14   4  -1    0.41    0.23 
 -16  -4  -1    0.02    0.57 
 -16  -4  -1    0.34    0.34 
  16  -4   1   -0.20    0.48 
  16  -4   1    0.54    0.31 
 -16  -4  -1   -0.04    0.42 
 -16  -4  -1    0.28    0.53 
  16  -4   1    0.51    0.46 
 -16  -4  -1    0.73    0.52 
  16  -4   1    0.05    0.46 
 -16  -4  -1    0.62    0.75 
 -16  -4  -1   -0.13    0.57 
  16  -4   1    0.08    0.27 
 -16   4  -1    0.50    0.28 
 -16   4  -1    0.71    0.21 
 -16   4  -1    0.16    0.27 
  16   4   1    0.63    0.64 
 -16   4  -1    0.39    0.59 
  16   4   1    0.63    0.61 
 -16   4  -1    0.56    0.52 
  16   4   1    0.87    0.65 
  16   4   1    0.37    0.64 
  16   4   1    1.22    0.68 
  18  -4   1    2.01    0.63 
  18  -4   1    2.52    0.60 
 -18  -4  -1    1.97    0.79 
  18  -4   1    3.96    0.79 
 -18  -4  -1    1.64    0.66 
 -18  -4  -1    2.40    0.99 
  18  -4   1    3.03    0.75 
 -18  -4  -1    4.22    0.92 
 -18  -4  -1    3.01    0.68 
 -18  -4  -1    2.87    0.52 
 -18   4  -1    2.83    0.37 
 -18   4  -1    3.35    0.94 
  18   4   1    1.85    0.80 
 -18   4  -1    3.48    0.67 
 -18   4  -1    2.44    0.51 
 -18   4  -1    3.00    0.49 
  18   4   1    4.18    1.01 
  20  -4   1    1.13    0.70 
  20  -4   1    0.58    0.60 
 -20  -4  -1    1.01    0.63 
  20  -4   1    0.62    0.51 
 -20  -4  -1    0.12    0.87 
 -20  -4  -1    0.37    0.74 
 -20  -4  -1   -0.16    0.70 
 -20   4  -1   -0.01    0.34 
 -20   4  -1    0.59    0.25 
  20   4   1    0.72    0.99 
 -20   4  -1    0.60    0.82 
  20   4   1    0.29    0.82 
 -20   4  -1    0.07    0.61 
 -22  -4  -1    4.94    1.40 
 -22  -4  -1    7.32    1.40 
 -22  -4  -1    7.45    1.16 
 -22  -4  -1    8.45    1.48 
  22  -4   1    8.40    1.36 
  22  -4   1    8.43    1.21 
  22  -4   1    7.81    1.12 
  22   4   1   11.38    1.51 
 -22   4  -1    8.22    1.81 
  22   4   1    9.12    1.72 
 -22   4  -1    9.13    0.59 
  24  -4   1    0.97    0.88 
 -24  -4  -1    0.84    0.98 
 -24  -4  -1    1.11    0.78 
  24   4   1    2.97    1.28 
 -24   4  -1    0.87    1.21 
  24   4   1    1.49    1.11 
  23  -5  -1    0.98    0.61 
 -23  -5   1    0.35    0.74 
  23   5  -1    0.19    0.97 
  23   5  -1   -0.84    1.24 
  21  -5  -1    3.20    0.76 
 -21  -5   1    2.46    0.95 
  21  -5  -1    2.77    0.67 
  21  -5  -1    2.23    0.83 
 -21  -5   1    2.44    0.77 
 -21  -5   1    1.51    0.90 
 -21  -5   1    2.69    1.18 
  21   5  -1    2.88    1.17 
  21   5  -1    2.09    1.00 
  21   5  -1    1.36    1.00 
 -21   5   1    1.64    1.03 
 -19  -5   1    0.44    0.39 
  19  -5  -1    0.06    0.50 
 -19  -5   1    1.02    0.71 
  19  -5  -1    0.03    0.55 
 -19  -5   1   -0.15    0.56 
  19  -5  -1    0.08    0.33 
 -19  -5   1   -0.62    0.72 
 -19  -5   1   -0.93    0.78 
  19   5  -1   -0.28    0.78 
  19   5  -1    0.53    0.78 
 -19   5   1    0.34    0.69 
  19   5  -1   -0.47    0.71 
 -17  -5   1  130.99    4.97 
  17  -5  -1  125.70    4.54 
 -17  -5   1  120.52    4.76 
 -17  -5   1  118.24    5.13 
  17  -5  -1  113.54    4.19 
  17  -5  -1  116.91    4.42 
 -17  -5   1  120.84    4.75 
  17  -5  -1  110.15    4.57 
  17   5  -1  125.45    4.83 
 -17   5   1  118.23    4.75 
  17   5  -1  118.42    5.04 
  17   5  -1  119.56    4.81 
  17   5  -1  118.17    4.70 
  15  -5  -1   14.08    0.78 
 -15  -5   1   17.49    1.60 
  15  -5  -1   15.85    1.17 
  15  -5  -1   16.56    0.92 
 -15  -5   1   18.24    1.38 
  15  -5  -1   17.44    1.20 
 -15  -5   1   17.12    1.48 
 -15  -5   1   16.38    1.35 
 -15  -5   1   16.56    1.38 
  15  -5  -1   17.70    1.10 
  15   5  -1   19.23    1.38 
  15   5  -1   15.33    1.43 
  15   5  -1   17.79    1.51 
  15   5  -1   18.09    1.45 
  15   5  -1   17.71    1.45 
  13  -5  -1    3.80    0.53 
 -13  -5   1    4.22    0.81 
  13  -5  -1    7.04    0.78 
 -13  -5   1    5.56    0.97 
  13  -5  -1    4.46    0.40 
 -13  -5   1    4.79    0.88 
 -13  -5   1    6.13    0.98 
 -13  -5   1    5.58    1.04 
  13  -5  -1    4.50    0.65 
  13  -5  -1    3.71    0.68 
 -13   5   1    5.62    0.88 
  13   5  -1    5.65    1.01 
  13   5  -1    5.44    1.01 
  13   5  -1    5.19    0.98 
 -13   5   1    5.35    0.76 
  13   5  -1    4.24    1.04 
  13   5  -1    4.75    0.85 
 -11  -5   1   69.06    3.01 
 -11  -5   1   65.15    2.86 
  11  -5  -1   65.87    2.49 
  11  -5  -1   63.75    2.53 
  11  -5  -1   64.39    2.50 
 -11  -5   1   67.77    2.83 
  11  -5  -1   67.69    2.77 
 -11  -5   1   67.23    2.79 
 -11  -5   1   67.49    2.92 
  11  -5  -1   64.39    2.27 
  11   5  -1   66.20    2.90 
 -11   5   1   64.10    2.80 
  11   5  -1   71.90    2.79 
  11   5  -1   67.54    2.88 
  11   5  -1   63.71    2.86 
  11   5  -1   67.22    2.92 
  11   5  -1   69.42    2.96 
  -9  -5   1    3.74    0.70 
   9  -5  -1    2.79    0.37 
   9  -5  -1    3.62    0.51 
  -9  -5   1    3.77    0.80 
   9  -5  -1    3.51    0.35 
  -9  -5   1    3.42    0.74 
  -9  -5   1    3.63    0.75 
  -9  -5   1    3.89    0.76 
   9  -5  -1    2.80    0.44 
  -9  -5   1    3.17    0.68 
   9  -5  -1    3.32    0.34 
   9  -5  -1    3.70    0.29 
   9   5  -1    3.96    0.76 
   9   5  -1    4.35    0.86 
   9   5  -1    3.16    0.58 
   9   5  -1    3.57    0.64 
   9   5  -1    2.79    0.61 
   9   5  -1    4.46    0.80 
  -9   5   1    3.71    0.27 
   9   5  -1    3.13    0.64 
  -9   5   1    3.39    0.70 
  -9   5   1    2.82    0.33 
  -7  -5   1   36.37    1.83 
  -7  -5   1   38.86    1.83 
  -7  -5   1   34.75    1.61 
  -7  -5   1   36.12    1.71 
  -7  -5   1   39.53    1.87 
   7  -5  -1   37.83    1.42 
   7  -5  -1   35.69    1.44 
   7  -5  -1   38.38    1.33 
   7  -5  -1   38.75    1.32 
   7  -5  -1   39.37    1.63 
  -7  -5   1   39.69    1.84 
   7  -5  -1   39.09    1.47 
   7  -5  -1   36.92    1.46 
  -7  -5   1   37.36    1.79 
  -7  -5   1   40.87    2.43 
   7  -5  -1   34.31    1.32 
   7   5  -1   41.88    1.85 
   7   5  -1   37.10    1.69 
   7   5  -1   37.50    1.67 
   7   5  -1   40.10    1.78 
   7   5  -1   36.69    1.50 
   7   5  -1   39.10    1.88 
  -7   5   1   36.53    1.44 
   7   5  -1   40.44    1.88 
  -7   5   1   37.58    1.42 
  -7   5   1   36.52    1.76 
   7   5  -1   36.86    1.84 
  -5  -5   1    0.92    0.37 
  -5  -5   1    0.65    0.42 
   5  -5  -1    0.20    0.26 
   5  -5  -1   -0.01    0.20 
   5  -5  -1    0.31    0.29 
   5  -5  -1   -0.10    0.18 
   5  -5  -1    0.50    0.20 
  -5  -5   1    0.29    0.33 
  -5  -5   1   -0.16    0.31 
  -5  -5   1    0.11    0.34 
   5  -5  -1    0.23    0.32 
  -5  -5   1    0.09    0.32 
   5  -5  -1    0.03    0.26 
  -5  -5   1   -0.01    0.35 
  -5  -5   1   -0.12    0.32 
  -5   5   1    0.41    0.40 
   5   5  -1    0.72    0.41 
   5   5  -1    0.12    0.32 
   5   5  -1   -0.16    0.33 
  -5   5   1   -0.04    0.25 
   5   5  -1    0.23    0.42 
   5   5  -1    0.58    0.34 
   5   5  -1    0.52    0.40 
   5   5  -1    1.21    0.38 
   5   5  -1    0.69    0.29 
  -5   5   1   -0.09    0.23 
  -3  -5   1  198.91    6.92 
   3  -5  -1  195.24    6.68 
   3  -5  -1  197.32    6.72 
  -3  -5   1  197.75    6.61 
   3  -5  -1  199.17    6.75 
  -3  -5   1  198.65    6.78 
   3  -5  -1  200.56    6.61 
   3  -5  -1  196.18    6.75 
   3  -5  -1  190.45    6.58 
   3  -5  -1  208.53    6.72 
  -3  -5   1  203.93    6.82 
  -3  -5   1  197.19    6.88 
  -3  -5   1  197.15    6.92 
  -3  -5   1  195.55    6.71 
  -3  -5   1  204.33    6.77 
  -3  -5   1  199.37    6.87 
  -3  -5   1  207.98    6.93 
   3  -5  -1  202.86    6.82 
   3   5  -1  204.72    6.75 
   3   5  -1  196.27    6.73 
  -3   5   1  194.53    6.73 
   3   5  -1  202.49    6.71 
   3   5  -1  195.41    6.85 
   3   5  -1  200.02    6.72 
   3   5  -1  198.65    6.90 
   3   5  -1  199.90    6.93 
  -3   5   1  200.43    6.89 
  -3   5   1  205.89    6.64 
  -3   5   1  192.22    6.72 
   3   5  -1  196.21    6.90 
   1  -5  -1   10.38    0.77 
   1  -5  -1   10.26    0.59 
   1  -5  -1   10.61    0.70 
  -1  -5   1    9.90    0.82 
   1  -5  -1   10.44    0.74 
   1  -5  -1    9.49    0.76 
   1  -5  -1   10.95    0.64 
  -1  -5   1    9.37    0.82 
  -1  -5   1   12.90    0.85 
  -1  -5   1   12.36    0.79 
  -1  -5   1   12.37    0.71 
  -1  -5   1    9.96    0.78 
   1  -5  -1   10.78    0.76 
  -1  -5   1   10.83    0.61 
  -1  -5   1   10.50    0.73 
   1  -5  -1   11.92    0.57 
  -1  -5   1   11.97    0.81 
   1  -5  -1   10.52    0.71 
  -1  -5   1   10.80    0.64 
  -1   5   1   11.30    0.78 
  -1   5   1   10.95    0.80 
  -1   5   1   10.93    0.71 
   1   5  -1   11.13    0.84 
   1   5  -1    9.99    0.72 
   1   5  -1   10.13    0.61 
   1   5  -1   10.67    0.57 
  -1   5   1    9.38    0.75 
   1   5  -1   10.07    0.76 
  -1   5   1   10.59    0.59 
   1   5  -1   10.57    0.80 
   1   5  -1   11.68    0.83 
  -1  -5  -1  236.27    7.97 
  -1  -5  -1  230.73    7.92 
   1  -5   1  237.33    7.91 
  -1  -5  -1  241.27    7.79 
  -1  -5  -1  234.79    7.97 
  -1  -5  -1  232.19    7.96 
   1  -5   1  228.92    7.86 
   1  -5   1  231.94    7.86 
   1  -5   1  232.66    7.91 
   1  -5   1  234.62    7.92 
   1  -5   1  234.26    7.74 
   1  -5   1  228.73    7.87 
  -1  -5  -1  237.28    7.94 
  -1  -5  -1  241.84    7.81 
  -1  -5  -1  243.48    7.84 
  -1  -5  -1  229.57    7.91 
   1  -5   1  226.46    7.68 
  -1   5  -1  225.79    7.66 
   1   5   1  237.06    7.96 
   1   5   1  237.39    7.95 
   1   5   1  233.56    7.76 
   1   5   1  227.72    7.90 
  -1   5  -1  227.17    7.82 
  -1   5  -1  235.96    7.82 
  -1   5  -1  237.21    7.89 
   1   5   1  230.64    7.72 
  -1   5  -1  229.70    7.90 
   1   5   1  234.50    7.96 
   1   5   1  235.34    7.88 
  -1   5  -1  229.37    7.91 
  -3  -5  -1  131.58    4.58 
  -3  -5  -1  128.28    4.45 
  -3  -5  -1  133.33    4.61 
   3  -5   1  130.73    4.55 
  -3  -5  -1  133.52    4.75 
   3  -5   1  127.65    4.52 
  -3  -5  -1  128.83    4.72 
   3  -5   1  132.59    4.37 
   3  -5   1  131.67    4.59 
  -3  -5  -1  128.11    4.70 
  -3  -5  -1  138.62    4.72 
   3  -5   1  132.03    4.51 
   3  -5   1  126.90    4.55 
   3  -5   1  131.53    4.49 
  -3  -5  -1  125.97    4.68 
   3  -5   1  127.25    4.33 
  -3  -5  -1  129.23    4.66 
   3   5   1  128.74    4.70 
  -3   5  -1  130.16    4.43 
   3   5   1  130.02    4.73 
   3   5   1  129.46    4.52 
   3   5   1  129.51    4.58 
  -3   5  -1  128.39    4.51 
  -3   5  -1  132.46    4.56 
  -3   5  -1  129.10    4.64 
   3   5   1  134.74    4.53 
   3   5   1  136.76    4.67 
  -3   5  -1  131.56    4.66 
  -3   5  -1  131.07    4.40 
   3   5   1  125.87    4.70 
   5  -5   1    6.48    0.35 
  -5  -5  -1    6.57    0.73 
  -5  -5  -1    5.94    0.70 
   5  -5   1    6.88    0.58 
  -5  -5  -1    6.64    0.56 
  -5  -5  -1    6.37    0.78 
   5  -5   1    6.19    0.53 
  -5  -5  -1    6.79    0.79 
   5  -5   1    5.85    0.49 
   5  -5   1    6.95    0.36 
  -5  -5  -1    7.29    0.72 
   5  -5   1    4.57    0.49 
   5  -5   1    6.76    0.62 
  -5  -5  -1    6.33    0.70 
   5  -5   1    6.29    0.44 
  -5  -5  -1    6.86    0.72 
   5   5   1    5.93    0.62 
   5   5   1    7.38    0.82 
   5   5   1    6.58    0.75 
   5   5   1    7.58    0.83 
  -5   5  -1    5.92    0.69 
  -5   5  -1    6.72    0.70 
   5   5   1    7.63    0.65 
  -5   5  -1    7.29    0.58 
  -5   5  -1    5.81    0.49 
   5   5   1    6.49    0.76 
   7  -5   1   54.21    2.04 
  -7  -5  -1   56.00    2.45 
  -7  -5  -1   56.89    2.41 
   7  -5   1   52.58    1.97 
  -7  -5  -1   58.69    2.41 
   7  -5   1   57.67    1.93 
  -7  -5  -1   57.71    2.50 
   7  -5   1   56.99    2.21 
   7  -5   1   59.33    2.07 
  -7  -5  -1   58.01    2.24 
  -7  -5  -1   55.59    2.33 
   7  -5   1   55.01    1.94 
  -7  -5  -1   55.47    2.42 
  -7   5  -1   52.88    2.35 
  -7   5  -1   54.70    2.07 
   7   5   1   56.92    2.27 
   7   5   1   56.65    2.28 
   7   5   1   57.80    2.50 
  -7   5  -1   57.39    2.31 
  -7   5  -1   56.53    2.01 
   7   5   1   56.23    2.41 
   7   5   1   58.36    2.48 
   7   5   1   58.35    2.46 
   7   5   1   56.24    2.35 
   9  -5   1  124.65    4.65 
   9  -5   1  122.30    4.40 
  -9  -5  -1  120.01    4.66 
   9  -5   1  120.34    4.25 
  -9  -5  -1  131.01    4.82 
   9  -5   1  126.79    4.21 
   9  -5   1  122.70    4.27 
   9  -5   1  128.86    4.22 
  -9  -5  -1  127.77    4.68 
  -9  -5  -1  124.04    4.62 
  -9  -5  -1  123.12    4.67 
  -9  -5  -1  128.97    4.79 
   9   5   1  122.50    4.71 
  -9   5  -1  126.01    4.64 
  -9   5  -1  121.90    4.15 
   9   5   1  124.16    4.79 
   9   5   1  129.34    4.76 
   9   5   1  129.75    4.59 
   9   5   1  128.31    4.70 
  -9   5  -1  125.49    4.23 
   9   5   1  126.53    4.69 
  -9   5  -1  123.60    4.51 
   9   5   1  125.84    4.57 
  11  -5   1   78.64    2.64 
  11  -5   1   80.03    2.62 
 -11  -5  -1   73.80    3.33 
  11  -5   1   80.47    3.13 
  11  -5   1   73.54    2.84 
 -11  -5  -1   71.93    3.13 
 -11  -5  -1   80.01    3.17 
 -11  -5  -1   77.43    3.20 
  11  -5   1   75.42    2.84 
 -11  -5  -1   85.80    3.37 
  11  -5   1   75.38    2.77 
 -11   5  -1   73.45    3.09 
  11   5   1   74.26    3.26 
 -11   5  -1   79.40    2.94 
  11   5   1   78.70    3.21 
 -11   5  -1   74.61    2.58 
  11   5   1   75.62    3.30 
  11   5   1   74.34    3.20 
 -11   5  -1   75.34    3.00 
 -11   5  -1   78.26    2.64 
  11   5   1   79.18    3.12 
  13  -5   1   35.85    1.32 
 -13  -5  -1   39.21    2.10 
  13  -5   1   36.93    1.34 
 -13  -5  -1   37.31    1.96 
  13  -5   1   35.20    1.55 
  13  -5   1   37.22    1.57 
  13  -5   1   37.65    1.84 
 -13  -5  -1   32.08    1.85 
  13  -5   1   32.08    1.63 
 -13  -5  -1   40.21    2.25 
 -13  -5  -1   35.24    1.93 
  13   5   1   39.72    2.17 
 -13   5  -1   35.70    1.78 
  13   5   1   36.63    2.02 
  13   5   1   40.23    1.93 
  13   5   1   40.91    2.04 
 -13   5  -1   36.79    1.76 
  13   5   1   34.66    2.02 
  15  -5   1   20.13    1.29 
  15  -5   1   24.69    1.39 
  15  -5   1   21.19    1.09 
 -15  -5  -1   21.46    1.53 
 -15  -5  -1   22.39    1.69 
  15  -5   1   23.18    0.91 
 -15  -5  -1   21.00    1.44 
  15  -5   1   21.90    1.20 
 -15  -5  -1   21.43    1.78 
  15  -5   1   20.18    0.90 
 -15  -5  -1   22.27    1.54 
 -15   5  -1   21.19    1.46 
  15   5   1   19.88    1.62 
  15   5   1   19.76    1.57 
  15   5   1   23.26    1.62 
  15   5   1   20.97    1.49 
  15   5   1   24.12    1.76 
 -15   5  -1   22.75    1.35 
  17  -5   1    9.72    1.01 
  17  -5   1    9.41    0.68 
 -17  -5  -1    9.46    1.18 
  17  -5   1    8.33    0.92 
  17  -5   1   11.10    0.60 
 -17  -5  -1   13.24    1.60 
  17  -5   1    7.95    1.04 
 -17  -5  -1   10.17    1.40 
 -17  -5  -1    9.94    1.28 
 -17   5  -1   10.37    1.02 
  17   5   1   12.10    1.54 
  17   5   1   11.00    1.32 
  17   5   1   11.31    1.24 
 -17   5  -1    9.25    1.24 
 -19  -5  -1    8.48    0.99 
 -19  -5  -1    5.33    1.32 
  19  -5   1    6.43    0.92 
  19  -5   1    5.92    0.94 
 -19  -5  -1    6.51    1.26 
 -19  -5  -1    3.88    1.16 
  19  -5   1    6.42    0.55 
 -19  -5  -1    6.52    0.71 
  19  -5   1    6.11    0.72 
 -19   5  -1    5.89    1.32 
  19   5   1    6.53    1.51 
 -19   5  -1    7.89    1.04 
  19   5   1    6.09    1.06 
 -21  -5  -1   11.27    1.19 
  21  -5   1   11.16    1.00 
 -21  -5  -1    9.68    1.52 
  21  -5   1    9.85    1.19 
 -21  -5  -1    9.62    1.84 
 -21  -5  -1    9.78    1.58 
  21   5   1   13.43    1.55 
 -21   5  -1   11.29    1.92 
  21   5   1    8.65    1.74 
  23  -5   1    6.22    1.21 
 -23  -5  -1    5.87    1.15 
  23   5   1    5.53    1.52 
  23   5   1    5.39    1.34 
 -22  -6   1    0.95    0.79 
  22   6  -1    3.79    1.43 
  22   6  -1    0.57    1.01 
 -20  -6   1    3.37    1.15 
  20  -6  -1    4.85    0.98 
 -20  -6   1    4.84    1.13 
  20   6  -1    2.46    1.02 
  20   6  -1    4.50    1.32 
  20   6  -1    4.09    1.17 
 -18  -6   1    1.66    0.82 
  18  -6  -1    0.81    0.57 
  18  -6  -1    1.78    0.67 
 -18  -6   1    1.34    0.86 
 -18  -6   1    2.09    0.88 
 -18  -6   1    2.15    0.98 
  18   6  -1    1.79    0.97 
  18   6  -1    3.35    1.01 
  18   6  -1    1.51    0.88 
 -16  -6   1    0.79    0.79 
 -16  -6   1    0.93    0.73 
  16  -6  -1    0.62    0.54 
 -16  -6   1    0.44    0.68 
 -16  -6   1   -0.26    0.62 
  16  -6  -1   -0.27    0.46 
 -16  -6   1    0.76    0.49 
  16   6  -1    1.61    0.82 
  16   6  -1    2.58    0.89 
  16   6  -1    0.03    0.73 
  16   6  -1    1.35    0.84 
  14  -6  -1    0.72    0.43 
 -14  -6   1    0.19    0.60 
 -14  -6   1    0.46    0.59 
 -14  -6   1    0.38    0.66 
  14  -6  -1    1.05    0.57 
  14  -6  -1    0.42    0.43 
 -14  -6   1    1.34    0.68 
 -14  -6   1    0.10    0.57 
 -14  -6   1    0.14    0.45 
 -14   6   1    0.65    0.58 
  14   6  -1    1.05    0.72 
  14   6  -1    0.91    0.67 
  14   6  -1    0.97    0.71 
  14   6  -1    0.97    0.68 
  14   6  -1    1.32    0.75 
  12  -6  -1    4.14    0.46 
 -12  -6   1    5.35    1.10 
  12  -6  -1    4.03    0.58 
 -12  -6   1    3.89    0.76 
 -12  -6   1    5.12    0.74 
 -12  -6   1    4.49    0.98 
  12  -6  -1    4.94    0.61 
  12  -6  -1    4.16    0.64 
 -12  -6   1    4.15    0.99 
 -12  -6   1    2.92    0.72 
  12  -6  -1    4.73    0.84 
  12  -6  -1    4.72    0.38 
  12   6  -1    5.57    0.89 
  12   6  -1    5.11    1.10 
  12   6  -1    3.60    0.85 
 -12   6   1    3.45    0.78 
  12   6  -1    4.75    0.90 
  12   6  -1    3.74    0.91 
 -10  -6   1    1.60    0.56 
  10  -6  -1    2.15    0.41 
 -10  -6   1    2.52    0.66 
  10  -6  -1    1.70    0.42 
 -10  -6   1    1.55    0.47 
  10  -6  -1    1.98    0.45 
  10  -6  -1    2.38    0.39 
 -10  -6   1    2.35    0.69 
  10  -6  -1    2.84    0.60 
 -10  -6   1    2.23    0.64 
 -10  -6   1    1.46    0.55 
 -10  -6   1    3.26    0.88 
 -10   6   1    1.88    0.36 
  10   6  -1    3.03    0.69 
  10   6  -1    1.70    0.71 
 -10   6   1    2.55    0.28 
  10   6  -1    3.72    0.92 
 -10   6   1    2.69    0.67 
  10   6  -1    2.87    0.65 
  10   6  -1    1.94    0.61 
  10   6  -1    2.19    0.67 
  -8  -6   1    0.70    0.53 
  -8  -6   1    1.47    0.48 
  -8  -6   1    0.85    0.48 
   8  -6  -1    1.15    0.32 
   8  -6  -1    1.20    0.23 
  -8  -6   1    0.48    0.45 
   8  -6  -1    0.86    0.25 
   8  -6  -1    1.17    0.22 
  -8  -6   1    1.94    0.56 
   8  -6  -1    0.67    0.34 
  -8  -6   1    1.43    0.51 
   8  -6  -1    1.37    0.33 
   8  -6  -1    0.87    0.18 
   8  -6  -1    0.90    0.40 
  -8  -6   1    1.71    0.58 
   8  -6  -1    0.94    0.22 
  -8   6   1    1.81    0.55 
   8   6  -1    1.75    0.52 
   8   6  -1    2.15    0.62 
   8   6  -1    1.09    0.35 
   8   6  -1    0.80    0.61 
   8   6  -1    2.10    0.60 
  -8   6   1    0.92    0.28 
   8   6  -1    1.58    0.53 
   8   6  -1    1.47    0.55 
   8   6  -1    1.29    0.49 
  -8   6   1    0.94    0.31 
   6  -6  -1    9.77    0.70 
  -6  -6   1    9.64    0.88 
   6  -6  -1    9.62    0.55 
   6  -6  -1    8.93    0.56 
  -6  -6   1   10.92    0.90 
  -6  -6   1   10.48    0.97 
   6  -6  -1    9.23    0.79 
   6  -6  -1    8.37    0.51 
   6  -6  -1   10.41    0.60 
  -6  -6   1    9.22    0.81 
   6  -6  -1    8.56    0.73 
  -6  -6   1    8.46    0.89 
  -6  -6   1   11.25    1.00 
  -6  -6   1    9.85    0.97 
   6  -6  -1    9.20    0.68 
  -6  -6   1    7.98    0.91 
  -6   6   1    7.62    0.67 
   6   6  -1   10.52    0.97 
  -6   6   1    9.04    0.64 
   6   6  -1    9.64    0.70 
   6   6  -1    9.99    0.83 
   6   6  -1    9.12    0.96 
   6   6  -1    9.74    0.81 
   6   6  -1    8.49    0.97 
  -6   6   1    8.89    0.92 
   6   6  -1    9.79    0.96 
   6   6  -1    9.17    0.75 
  -4  -6   1    1.19    0.29 
   4  -6  -1    0.26    0.21 
   4  -6  -1    0.96    0.35 
   4  -6  -1    0.91    0.27 
  -4  -6   1    0.79    0.37 
  -4  -6   1    0.61    0.36 
   4  -6  -1    1.12    0.40 
  -4  -6   1    1.14    0.45 
  -4  -6   1    0.51    0.39 
   4  -6  -1    0.89    0.41 
  -4  -6   1    0.34    0.44 
  -4  -6   1    0.21    0.35 
  -4  -6   1    0.38    0.37 
   4  -6  -1    0.76    0.30 
  -4  -6   1    1.14    0.40 
   4  -6  -1    0.53    0.27 
   4  -6  -1    1.22    0.37 
  -4   6   1    1.04    0.36 
   4   6  -1    1.41    0.53 
   4   6  -1    0.17    0.32 
   4   6  -1    0.19    0.47 
   4   6  -1    1.15    0.47 
  -4   6   1    0.63    0.24 
   4   6  -1    0.68    0.36 
   4   6  -1    0.69    0.33 
  -4   6   1    0.59    0.42 
  -4   6   1    0.73    0.34 
   4   6  -1    0.74    0.45 
   4   6  -1    1.12    0.38 
   2  -6  -1   36.70    1.64 
  -2  -6   1   33.98    1.66 
   2  -6  -1   35.84    1.67 
   2  -6  -1   35.67    1.33 
  -2  -6   1   37.97    1.67 
   2  -6  -1   33.85    1.41 
  -2  -6   1   36.83    1.73 
  -2  -6   1   36.14    1.53 
   2  -6  -1   37.13    1.48 
  -2  -6   1   35.94    1.73 
   2  -6  -1   38.36    1.62 
  -2  -6   1   39.81    1.60 
  -2  -6   1   37.52    1.76 
   2  -6  -1   35.24    1.55 
  -2  -6   1   34.92    1.37 
  -2  -6   1   34.46    1.48 
  -2  -6   1   37.84    1.71 
   2  -6  -1   36.29    1.60 
   2  -6  -1   34.41    1.63 
  -2   6   1   36.23    1.70 
   2   6  -1   36.88    1.48 
   2   6  -1   34.95    1.43 
   2   6  -1   37.45    1.73 
  -2   6   1   35.33    1.62 
  -2   6   1   34.61    1.61 
   2   6  -1   38.40    1.71 
   2   6  -1   35.37    1.73 
   2   6  -1   34.16    1.58 
  -2   6   1   36.25    1.53 
   2   6  -1   34.58    1.68 
   0  -6   1   39.39    1.76 
   0  -6   1   40.10    1.50 
   0  -6  -1   40.85    1.81 
   0  -6  -1   41.00    1.58 
   0  -6   1   41.43    1.63 
   0  -6   1   41.78    1.79 
   0  -6  -1   40.52    1.80 
   0  -6   1   38.77    1.76 
   0  -6  -1   39.62    1.77 
   0  -6   1   39.49    1.84 
   0  -6   1   40.34    1.82 
   0  -6  -1   42.31    1.67 
   0  -6   1   37.77    1.54 
   0  -6  -1   39.10    1.82 
   0  -6  -1   41.06    1.75 
   0  -6   1   40.69    1.78 
   0  -6  -1   37.86    1.59 
   0  -6  -1   40.98    1.82 
   0   6  -1   38.95    1.80 
   0   6   1   37.69    1.78 
   0   6  -1   40.54    1.54 
   0   6  -1   39.94    1.44 
   0   6   1   42.95    1.83 
   0   6  -1   39.51    1.78 
   0   6   1   39.42    1.59 
   0   6  -1   40.45    1.76 
   0   6  -1   39.05    1.73 
   0   6   1   40.02    1.80 
   2  -6   1    2.74    0.34 
  -2  -6  -1    3.49    0.52 
   2  -6   1    3.50    0.55 
  -2  -6  -1    3.68    0.42 
  -2  -6  -1    2.66    0.68 
  -2  -6  -1    2.59    0.52 
   2  -6   1    3.19    0.53 
   2  -6   1    3.42    0.57 
   2  -6   1    3.62    0.43 
  -2  -6  -1    3.17    0.60 
  -2  -6  -1    3.28    0.61 
   2  -6   1    4.01    0.67 
  -2  -6  -1    3.83    0.66 
  -2  -6  -1    3.56    0.60 
   2  -6   1    4.45    0.58 
  -2  -6  -1    3.29    0.60 
   2  -6   1    3.61    0.59 
  -2   6  -1    3.29    0.57 
   2   6   1    3.49    0.61 
   2   6   1    3.31    0.68 
  -2   6  -1    2.87    0.45 
  -2   6  -1    3.99    0.67 
   2   6   1    3.00    0.44 
  -2   6  -1    3.22    0.62 
   2   6   1    4.33    0.53 
   2   6   1    3.74    0.66 
   2   6   1    3.37    0.66 
   2   6   1    3.14    0.68 
  -4  -6  -1    0.10    0.36 
   4  -6   1    0.15    0.25 
  -4  -6  -1   -0.19    0.38 
  -4  -6  -1    0.20    0.34 
  -4  -6  -1   -0.06    0.36 
  -4  -6  -1    0.18    0.26 
   4  -6   1    0.17    0.21 
  -4  -6  -1    0.43    0.39 
  -4  -6  -1   -0.19    0.35 
   4  -6   1    0.00    0.24 
   4  -6   1    0.17    0.17 
  -4  -6  -1    0.30    0.35 
   4  -6   1   -0.16    0.27 
   4  -6   1   -0.20    0.27 
   4  -6   1    0.21    0.35 
   4  -6   1    0.31    0.36 
   4   6   1   -0.20    0.43 
   4   6   1    0.27    0.42 
  -4   6  -1    0.14    0.25 
  -4   6  -1    0.17    0.19 
  -4   6  -1    0.08    0.38 
   4   6   1   -0.05    0.40 
  -4   6  -1    0.09    0.32 
   4   6   1    0.42    0.36 
   4   6   1    0.32    0.39 
   4   6   1    0.01    0.33 
   4   6   1    0.44    0.32 
  -4   6  -1    0.21    0.29 
  -6  -6  -1   19.39    1.29 
   6  -6   1   19.08    0.83 
   6  -6   1   21.39    0.81 
  -6  -6  -1   22.74    1.28 
   6  -6   1   19.29    0.96 
  -6  -6  -1   23.28    1.35 
  -6  -6  -1   22.23    1.40 
   6  -6   1   21.02    1.09 
  -6  -6  -1   20.54    1.29 
   6  -6   1   21.10    1.03 
  -6  -6  -1   21.83    1.37 
  -6  -6  -1   20.42    1.09 
   6  -6   1   21.01    0.92 
   6  -6   1   20.03    1.14 
   6  -6   1   21.85    1.09 
   6   6   1   20.47    1.35 
   6   6   1   21.36    1.35 
  -6   6  -1   21.01    1.29 
  -6   6  -1   19.62    0.99 
   6   6   1   22.63    1.14 
   6   6   1   22.25    1.42 
   6   6   1   19.94    1.36 
  -6   6  -1   23.06    1.10 
  -6   6  -1   21.64    1.28 
   6   6   1   25.03    1.21 
   6   6   1   22.67    1.22 
   8  -6   1    1.30    0.34 
   8  -6   1    0.98    0.36 
  -8  -6  -1    1.17    0.50 
  -8  -6  -1    0.80    0.51 
   8  -6   1    1.48    0.33 
   8  -6   1    1.30    0.27 
  -8  -6  -1    2.06    0.57 
  -8  -6  -1    0.80    0.50 
   8  -6   1    1.17    0.31 
  -8  -6  -1    2.61    0.65 
   8  -6   1    1.24    0.19 
  -8  -6  -1    1.62    0.54 
   8  -6   1    1.33    0.29 
   8  -6   1    1.12    0.42 
   8   6   1    0.97    0.58 
   8   6   1    1.69    0.62 
   8   6   1    2.12    0.63 
   8   6   1    0.61    0.46 
  -8   6  -1    1.39    0.53 
  -8   6  -1    1.05    0.32 
   8   6   1    1.36    0.57 
  -8   6  -1    3.38    0.73 
   8   6   1    1.71    0.52 
  -8   6  -1    1.78    0.34 
  10  -6   1   34.73    1.40 
 -10  -6  -1   36.47    2.01 
 -10  -6  -1   31.67    1.77 
 -10  -6  -1   34.82    1.96 
 -10  -6  -1   34.56    1.88 
  10  -6   1   34.77    1.35 
 -10  -6  -1   34.64    1.84 
  10  -6   1   33.59    1.82 
  10  -6   1   32.85    1.37 
  10  -6   1   31.69    1.32 
  10   6   1   34.45    2.12 
 -10   6  -1   34.02    1.80 
 -10   6  -1   35.14    1.38 
  10   6   1   32.48    1.70 
  10   6   1   34.64    1.89 
  10   6   1   36.18    1.94 
  10   6   1   35.85    2.00 
 -10   6  -1   36.60    1.77 
  10   6   1   32.78    1.93 
 -10   6  -1   33.76    1.26 
 -12  -6  -1   97.83    3.97 
 -12  -6  -1   96.94    3.94 
  12  -6   1  100.46    3.91 
  12  -6   1   96.96    3.45 
 -12  -6  -1  100.40    3.94 
  12  -6   1   87.68    3.47 
 -12  -6  -1   92.03    4.13 
  12  -6   1   97.22    3.31 
 -12  -6  -1  100.91    4.13 
  12  -6   1   97.33    3.37 
  12   6   1  101.11    4.18 
  12   6   1   93.20    4.04 
  12   6   1   95.10    4.00 
  12   6   1  103.98    3.88 
  12   6   1  104.50    4.01 
 -12   6  -1  100.02    3.77 
 -12   6  -1   95.05    3.89 
  14  -6   1    3.93    0.43 
  14  -6   1    2.33    0.52 
 -14  -6  -1    2.86    0.78 
 -14  -6  -1    4.46    1.12 
 -14  -6  -1    3.49    0.94 
  14  -6   1    4.29    0.36 
 -14  -6  -1    5.04    1.05 
  14  -6   1    4.41    0.84 
  14  -6   1    3.92    0.60 
 -14  -6  -1    4.22    1.07 
  14   6   1    5.04    1.25 
 -14   6  -1    4.12    0.83 
  14   6   1    4.28    0.86 
  14   6   1    2.48    0.79 
  14   6   1    5.14    1.23 
  14   6   1    2.93    0.84 
  16  -6   1    2.64    0.58 
 -16  -6  -1    2.90    0.87 
 -16  -6  -1    1.41    0.84 
  16  -6   1    3.29    0.90 
 -16  -6  -1    5.42    1.14 
  16  -6   1    2.48    0.40 
 -16  -6  -1    3.12    0.86 
  16   6   1    4.89    1.08 
 -16   6  -1    2.78    0.76 
  16   6   1    3.38    1.08 
  16   6   1    2.80    0.99 
 -18  -6  -1    0.30    0.78 
 -18  -6  -1   -0.48    0.78 
  18  -6   1    0.12    0.61 
  18  -6   1    0.72    0.27 
 -18  -6  -1    0.32    0.77 
 -18   6  -1   -0.28    0.66 
  18   6   1    1.25    0.85 
  18   6   1   -0.28    0.88 
  20  -6   1    1.17    0.69 
 -20  -6  -1    1.07    0.89 
 -20  -6  -1    1.92    1.09 
 -20  -6  -1    1.23    0.71 
  20  -6   1    2.73    0.65 
  20   6   1    1.08    0.95 
  20   6   1    0.49    1.03 
 -22  -6  -1   12.52    1.42 
  22   6   1   10.04    2.48 
  22   6   1   11.36    1.67 
  21  -7  -1    0.94    0.75 
  21   7  -1    1.67    1.23 
  21   7  -1    0.34    0.97 
 -19  -7   1   -0.07    0.81 
 -19  -7   1    1.04    0.99 
  19  -7  -1    1.53    0.78 
  19   7  -1    0.56    1.22 
  19   7  -1    0.76    0.91 
  19   7  -1    0.79    1.06 
  17  -7  -1    3.81    0.93 
 -17  -7   1    5.72    1.45 
 -17  -7   1    1.87    1.07 
 -17  -7   1    3.10    0.92 
  17   7  -1    4.48    1.22 
  17   7  -1    3.35    1.08 
  17   7  -1    4.65    1.14 
 -15  -7   1    2.69    0.99 
 -15  -7   1    4.45    1.13 
 -15  -7   1    3.59    0.91 
  15  -7  -1    3.81    0.70 
  15  -7  -1    3.24    0.92 
 -15   7   1    5.74    1.08 
  15   7  -1    4.84    1.07 
  15   7  -1    4.14    1.05 
  15   7  -1    3.32    0.99 
  13  -7  -1   32.62    1.29 
 -13  -7   1   34.66    2.12 
  13  -7  -1   34.03    1.44 
 -13  -7   1   36.52    2.17 
 -13  -7   1   33.73    1.97 
 -13  -7   1   32.83    2.13 
  13  -7  -1   31.25    1.40 
  13  -7  -1   32.55    1.51 
  13  -7  -1   34.77    1.95 
  13   7  -1   33.81    2.10 
  13   7  -1   36.12    2.69 
  13   7  -1   33.91    1.88 
 -13   7   1   31.50    1.95 
  13   7  -1   33.32    2.07 
  13   7  -1   35.05    2.15 
  13   7  -1   30.70    1.47 
 -11  -7   1    9.78    1.14 
 -11  -7   1   13.03    1.31 
 -11  -7   1   10.92    1.27 
  11  -7  -1    9.09    0.76 
 -11  -7   1    9.19    1.18 
  11  -7  -1    9.08    1.13 
  11  -7  -1    9.48    0.67 
  11  -7  -1    9.30    0.73 
 -11  -7   1   12.35    1.16 
  11  -7  -1    8.82    0.73 
  11   7  -1    7.99    1.20 
  11   7  -1   11.00    1.27 
 -11   7   1    9.46    0.60 
 -11   7   1   10.83    0.52 
  11   7  -1    9.82    0.78 
  11   7  -1    7.30    1.26 
 -11   7   1   11.97    1.20 
  11   7  -1    9.85    1.04 
  11   7  -1   11.19    1.34 
   9  -7  -1    0.77    0.41 
  -9  -7   1    0.41    0.52 
   9  -7  -1    0.27    0.27 
   9  -7  -1    0.26    0.33 
  -9  -7   1    0.11    0.48 
   9  -7  -1    0.53    0.34 
  -9  -7   1    0.10    0.51 
  -9  -7   1    0.18    0.48 
  -9  -7   1    0.68    0.63 
  -9  -7   1    0.66    0.56 
   9   7  -1    0.47    0.37 
   9   7  -1    0.20    0.64 
  -9   7   1    0.38    0.28 
  -9   7   1    0.05    0.57 
   9   7  -1    1.49    0.61 
   9   7  -1    0.79    0.51 
  -9   7   1    0.17    0.32 
   9   7  -1    0.48    0.57 
   9   7  -1    0.98    0.65 
   9   7  -1    0.59    0.52 
   7  -7  -1    6.45    0.49 
  -7  -7   1    7.35    0.91 
   7  -7  -1    6.31    0.72 
   7  -7  -1    7.67    0.71 
  -7  -7   1    6.78    1.01 
  -7  -7   1    6.31    0.95 
   7  -7  -1    6.30    0.48 
  -7  -7   1    6.50    0.87 
   7  -7  -1    6.17    0.52 
  -7  -7   1    8.38    1.01 
   7  -7  -1    6.42    0.66 
  -7  -7   1    6.42    0.90 
  -7   7   1    7.77    0.96 
   7   7  -1    7.67    0.80 
   7   7  -1    7.64    0.70 
   7   7  -1    6.78    0.99 
   7   7  -1    9.03    1.07 
   7   7  -1    8.09    1.04 
  -7   7   1    6.19    0.66 
   7   7  -1    4.49    0.99 
   7   7  -1    6.56    0.83 
  -7   7   1    6.26    0.61 
   5  -7  -1   18.79    0.99 
  -5  -7   1   17.01    1.28 
  -5  -7   1   19.57    1.38 
   5  -7  -1   19.16    0.90 
  -5  -7   1   17.28    1.28 
  -5  -7   1   19.94    1.45 
   5  -7  -1   17.14    1.08 
   5  -7  -1   17.95    0.95 
  -5  -7   1   19.48    1.17 
  -5  -7   1   19.71    0.98 
   5  -7  -1   15.60    1.02 
  -5  -7   1   20.16    1.21 
  -5  -7   1   18.16    1.28 
   5  -7  -1   18.47    1.12 
   5  -7  -1   17.83    0.85 
   5   7  -1   18.96    1.33 
   5   7  -1   18.13    1.07 
   5   7  -1   17.22    1.31 
  -5   7   1   17.10    1.05 
   5   7  -1   16.85    1.05 
   5   7  -1   18.22    1.31 
   5   7  -1   18.58    1.08 
   5   7  -1   17.34    1.30 
  -5   7   1   18.49    0.81 
  -5   7   1   18.21    1.28 
  -5   7   1   17.00    1.02 
  -3  -7   1    1.07    0.39 
  -3  -7   1    0.63    0.49 
  -3  -7   1    0.15    0.38 
   3  -7  -1    0.35    0.37 
  -3  -7   1    0.99    0.43 
   3  -7  -1    0.93    0.34 
   3  -7  -1    0.44    0.32 
   3  -7  -1   -0.02    0.39 
   3  -7  -1    0.62    0.40 
   3  -7  -1    0.65    0.37 
  -3  -7   1    0.31    0.41 
   3  -7  -1    0.60    0.26 
  -3  -7   1    0.31    0.42 
  -3  -7   1    0.18    0.38 
  -3  -7   1    0.48    0.26 
   3   7  -1    1.20    0.42 
   3   7  -1    0.17    0.48 
   3   7  -1   -0.64    0.45 
  -3   7   1    1.90    0.54 
  -3   7   1    0.58    0.31 
   3   7  -1   -0.05    0.28 
   3   7  -1    0.36    0.39 
  -3   7   1    0.35    0.38 
   3   7  -1    0.18    0.40 
  -3   7   1    0.44    0.39 
   3   7  -1    0.91    0.49 
  -1  -7   1    0.47    0.29 
   1  -7  -1    0.72    0.37 
   1  -7  -1    0.20    0.37 
  -1  -7   1    0.41    0.40 
   1  -7  -1    0.42    0.44 
   1  -7  -1    0.25    0.35 
  -1  -7   1    0.44    0.47 
   1  -7  -1    0.29    0.33 
   1  -7  -1    0.52    0.39 
   1  -7  -1    0.80    0.37 
  -1  -7   1    0.53    0.41 
   1  -7  -1    0.33    0.24 
  -1  -7   1    0.54    0.31 
  -1  -7   1    0.51    0.41 
  -1  -7   1    0.81    0.25 
  -1  -7   1    0.52    0.36 
  -1  -7   1    0.67    0.39 
   1   7  -1    0.69    0.44 
   1   7  -1    0.32    0.24 
   1   7  -1   -0.02    0.43 
   1   7  -1    0.58    0.42 
   1   7  -1    0.30    0.38 
   1   7  -1    0.71    0.47 
  -1   7   1    1.08    0.44 
  -1   7   1    1.17    0.45 
  -1   7   1    0.93    0.45 
  -1   7   1    0.58    0.36 
   1   7  -1    1.39    0.37 
   1  -7   1    2.68    0.64 
  -1  -7  -1    2.35    0.55 
  -1  -7  -1    3.29    0.64 
   1  -7   1    3.03    0.60 
   1  -7   1    2.36    0.41 
  -1  -7  -1    2.66    0.65 
   1  -7   1    2.65    0.61 
   1  -7   1    3.47    0.52 
  -1  -7  -1    2.89    0.70 
  -1  -7  -1    2.43    0.56 
   1  -7   1    3.00    0.63 
   1  -7   1    3.01    0.62 
  -1  -7  -1    3.74    0.59 
  -1  -7  -1    2.43    0.51 
  -1   7  -1    2.56    0.63 
   1   7   1    2.24    0.42 
   1   7   1    2.90    0.69 
  -1   7  -1    3.07    0.60 
   1   7   1    3.13    0.51 
   1   7   1    2.17    0.51 
   1   7   1    2.61    0.57 
  -1   7  -1    3.40    0.71 
  -1   7  -1    1.98    0.52 
  -1   7  -1    2.81    0.56 
   1   7   1    2.86    0.72 
  -3  -7  -1    4.95    0.68 
  -3  -7  -1    4.78    0.76 
   3  -7   1    4.81    0.63 
  -3  -7  -1    4.74    0.78 
   3  -7   1    4.48    0.51 
   3  -7   1    4.73    0.74 
  -3  -7  -1    5.12    0.81 
   3  -7   1    4.64    0.61 
   3  -7   1    4.44    0.67 
  -3  -7  -1    5.52    0.69 
  -3  -7  -1    4.33    0.74 
  -3  -7  -1    5.83    0.84 
   3  -7   1    4.29    0.67 
   3  -7   1    4.03    0.42 
  -3  -7  -1    5.24    0.54 
   3   7   1    4.39    0.57 
  -3   7  -1    4.63    0.52 
   3   7   1    5.09    0.82 
  -3   7  -1    4.98    0.67 
   3   7   1    5.14    0.84 
   3   7   1    4.86    0.71 
   3   7   1    5.25    0.64 
   3   7   1    4.96    0.87 
  -3   7  -1    5.30    0.82 
  -3   7  -1    6.06    0.75 
  -5  -7  -1   -0.20    0.31 
  -5  -7  -1   -0.02    0.40 
  -5  -7  -1   -0.17    0.39 
  -5  -7  -1    0.29    0.51 
   5  -7   1   -0.17    0.39 
   5  -7   1   -0.17    0.32 
   5  -7   1    0.10    0.22 
   5  -7   1   -0.12    0.27 
  -5  -7  -1   -0.06    0.41 
   5  -7   1    0.08    0.28 
  -5  -7  -1   -0.21    0.37 
   5  -7   1    0.03    0.19 
  -5  -7  -1   -0.22    0.40 
   5  -7   1   -0.19    0.33 
   5   7   1   -0.01    0.41 
   5   7   1    0.46    0.49 
  -5   7  -1   -0.11    0.34 
   5   7   1   -0.51    0.48 
  -5   7  -1   -0.14    0.29 
   5   7   1   -0.61    0.36 
  -5   7  -1   -0.23    0.18 
   5   7   1    0.14    0.45 
   5   7   1    0.54    0.52 
   5   7   1   -0.13    0.34 
  -5   7  -1    0.10    0.44 
  -7  -7  -1    1.23    0.53 
   7  -7   1    1.06    0.23 
   7  -7   1    0.91    0.38 
  -7  -7  -1    0.22    0.47 
  -7  -7  -1    0.53    0.58 
   7  -7   1    0.79    0.27 
  -7  -7  -1    1.15    0.53 
  -7  -7  -1    0.42    0.49 
  -7  -7  -1    1.25    0.47 
  -7  -7  -1    0.48    0.48 
   7  -7   1    0.81    0.36 
   7  -7   1    0.40    0.42 
  -7   7  -1    0.39    0.50 
   7   7   1    0.85    0.56 
  -7   7  -1    0.65    0.31 
   7   7   1    0.80    0.44 
  -7   7  -1    0.94    0.40 
   7   7   1    0.80    0.49 
   7   7   1    0.97    0.61 
   7   7   1    0.76    0.59 
   7   7   1    0.79    0.53 
   7   7   1    0.57    0.45 
  -9  -7  -1    9.87    1.14 
   9  -7   1    8.48    0.57 
   9  -7   1    9.16    1.12 
  -9  -7  -1    9.62    1.04 
  -9  -7  -1    8.77    1.14 
   9  -7   1    9.27    0.69 
   9  -7   1    9.68    0.84 
   9  -7   1   10.41    0.78 
  -9  -7  -1    9.00    1.09 
  -9  -7  -1    9.98    1.20 
   9  -7   1    8.13    0.49 
  -9  -7  -1    8.82    1.07 
  -9   7  -1    9.93    0.60 
  -9   7  -1    9.93    1.07 
   9   7   1    8.65    1.18 
   9   7   1    9.19    1.07 
   9   7   1    8.87    1.14 
  -9   7  -1    7.67    0.70 
   9   7   1    8.95    0.96 
   9   7   1    6.41    1.12 
   9   7   1    8.74    1.18 
   9   7   1    9.63    0.85 
  11  -7   1    0.49    0.30 
  11  -7   1    1.30    0.44 
 -11  -7  -1    0.70    0.63 
  11  -7   1    0.72    0.36 
 -11  -7  -1    1.88    0.73 
  11  -7   1    0.93    0.64 
 -11  -7  -1    0.46    0.56 
  11  -7   1    0.68    0.32 
 -11  -7  -1    1.77    0.67 
 -11  -7  -1    0.64    0.66 
  11   7   1    1.35    0.66 
  11   7   1    1.67    0.68 
  11   7   1    1.19    0.73 
 -11   7  -1    1.19    0.58 
 -11   7  -1    0.90    0.33 
  11   7   1    1.05    0.67 
 -11   7  -1    1.34    0.31 
  11   7   1    1.17    0.73 
  13  -7   1   -0.16    0.23 
  13  -7   1    0.50    0.39 
  13  -7   1    0.98    0.64 
  13  -7   1   -0.11    0.33 
 -13  -7  -1   -0.19    0.60 
 -13  -7  -1    0.32    0.64 
  13  -7   1   -0.09    0.37 
 -13  -7  -1    0.13    0.71 
 -13  -7  -1    0.75    0.67 
  13   7   1    1.49    0.74 
  13   7   1   -0.02    0.75 
  13   7   1   -0.36    0.68 
 -15  -7  -1    2.71    0.89 
  15  -7   1    3.20    0.53 
  15  -7   1    3.93    1.03 
 -15  -7  -1    4.15    1.03 
 -15  -7  -1    3.95    1.13 
  15   7   1    4.56    1.12 
  15   7   1    4.23    1.05 
 -17  -7  -1   -0.23    0.81 
 -17  -7  -1    1.67    0.94 
  17  -7   1    0.71    0.69 
 -17  -7  -1    0.61    0.79 
  17   7   1    0.63    0.80 
  17   7   1    0.73    0.93 
  19  -7   1    0.17    0.70 
 -19  -7  -1    0.18    0.90 
  19   7   1    0.92    0.90 
  19   7   1    2.25    1.21 
 -21  -7  -1    0.95    0.79 
  21  -7   1    0.07    0.77 
  21   7   1    0.29    1.19 
  21   7   1    1.48    1.09 
  20  -8  -1    0.67    0.79 
  20   8  -1    0.78    1.47 
  20   8  -1    2.07    1.09 
 -18  -8   1   13.46    2.27 
  18  -8  -1   18.71    1.63 
 -18  -8   1   16.02    1.75 
  18   8  -1   15.98    2.20 
  18   8  -1   15.90    1.88 
  18   8  -1   17.09    1.63 
 -16  -8   1   15.79    1.64 
 -16  -8   1   16.12    1.98 
  16  -8  -1   17.22    1.62 
 -16  -8   1   17.01    1.90 
  16   8  -1   17.92    1.56 
 -16   8   1   15.57    1.58 
  16   8  -1   18.45    2.06 
  16   8  -1   14.88    1.88 
 -14  -8   1   26.91    2.10 
  14  -8  -1   22.67    1.19 
 -14  -8   1   22.89    1.91 
  14  -8  -1   20.89    1.76 
  14  -8  -1   19.60    1.22 
 -14  -8   1   25.04    2.04 
 -14   8   1   23.08    1.74 
  14   8  -1   23.09    1.66 
  14   8  -1   20.73    2.05 
  14   8  -1   22.73    2.03 
  12  -8  -1    5.62    1.15 
  12  -8  -1    7.51    0.80 
  12  -8  -1    6.97    0.74 
 -12  -8   1    6.37    1.25 
 -12  -8   1    7.03    1.13 
 -12  -8   1    6.64    1.25 
 -12   8   1    6.87    0.45 
 -12   8   1    7.24    0.55 
 -12   8   1    7.13    1.16 
  12   8  -1    6.49    1.11 
  12   8  -1    7.21    1.46 
  12   8  -1    7.57    1.08 
  12   8  -1    5.69    1.36 
 -10  -8   1   11.32    1.32 
  10  -8  -1   12.12    0.95 
  10  -8  -1    9.98    0.88 
 -10  -8   1   11.22    1.25 
 -10  -8   1    9.75    1.32 
  10  -8  -1   10.56    0.93 
 -10  -8   1   10.99    1.17 
  10   8  -1   11.19    1.35 
  10   8  -1   13.67    1.16 
  10   8  -1    9.82    0.86 
  10   8  -1   11.88    1.43 
 -10   8   1    9.49    0.76 
 -10   8   1    9.54    0.68 
  10   8  -1   11.18    1.38 
 -10   8   1   11.88    1.24 
   8  -8  -1    2.96    0.42 
  -8  -8   1    1.46    0.61 
  -8  -8   1    4.07    0.91 
  -8  -8   1    2.04    0.65 
   8  -8  -1    2.91    0.67 
  -8  -8   1    4.16    0.96 
  -8  -8   1    3.00    0.70 
  -8  -8   1    1.86    0.71 
   8  -8  -1    2.80    0.63 
   8  -8  -1    3.20    0.71 
   8   8  -1    2.64    0.79 
   8   8  -1    3.46    0.77 
  -8   8   1    3.18    0.79 
  -8   8   1    3.42    0.65 
   8   8  -1    2.15    0.73 
  -8   8   1    2.58    0.57 
   8   8  -1    3.38    0.67 
   8   8  -1    3.93    0.90 
   8   8  -1    2.83    0.74 
   8   8  -1    2.78    0.67 
   6  -8  -1    7.71    0.85 
  -6  -8   1    8.78    1.07 
  -6  -8   1    8.56    1.00 
   6  -8  -1    7.61    0.81 
  -6  -8   1    7.70    1.03 
  -6  -8   1    9.19    1.10 
   6  -8  -1    7.53    0.59 
  -6  -8   1    9.70    1.17 
   6  -8  -1    5.90    0.66 
   6  -8  -1    7.86    0.90 
   6  -8  -1    7.56    0.61 
  -6  -8   1    8.37    0.95 
  -6   8   1    8.40    0.78 
   6   8  -1    9.21    0.86 
   6   8  -1    7.43    1.09 
  -6   8   1    7.39    1.04 
   6   8  -1    7.45    0.87 
   6   8  -1    6.83    1.11 
  -6   8   1    8.69    0.78 
  -6   8   1    9.94    0.85 
   6   8  -1    7.24    1.05 
   6   8  -1    9.16    0.85 
   6   8  -1    6.19    1.07 
   4  -8  -1   67.98    2.87 
  -4  -8   1   71.06    2.85 
  -4  -8   1   70.43    3.05 
   4  -8  -1   72.91    2.84 
  -4  -8   1   70.47    3.18 
   4  -8  -1   67.68    2.87 
  -4  -8   1   71.62    3.09 
   4  -8  -1   66.65    2.73 
  -4  -8   1   70.08    2.60 
   4  -8  -1   64.06    2.53 
  -4  -8   1   74.03    3.00 
  -4  -8   1   66.86    3.05 
   4  -8  -1   68.63    2.61 
  -4  -8   1   68.70    2.79 
   4   8  -1   73.02    2.74 
   4   8  -1   67.57    2.66 
   4   8  -1   72.18    3.05 
  -4   8   1   64.59    2.54 
   4   8  -1   72.06    2.83 
  -4   8   1   66.41    2.76 
  -4   8   1   71.15    2.83 
   4   8  -1   70.08    3.07 
   4   8  -1   68.20    2.94 
   4   8  -1   72.24    3.03 
  -4   8   1   71.02    3.04 
  -2  -8   1    8.12    0.90 
   2  -8  -1    4.97    0.89 
  -2  -8   1    7.11    0.69 
   2  -8  -1    5.41    0.85 
   2  -8  -1    5.85    0.75 
  -2  -8   1    4.67    0.89 
  -2  -8   1    7.85    0.57 
  -2  -8   1    8.77    1.07 
   2  -8  -1    5.99    0.70 
  -2  -8   1    5.74    0.89 
  -2  -8   1    5.99    0.78 
   2  -8  -1    5.18    0.80 
  -2  -8   1    5.88    0.89 
   2  -8  -1    4.78    0.79 
  -2   8   1    5.93    0.90 
  -2   8   1    6.32    0.91 
   2   8  -1    7.09    0.59 
   2   8  -1    5.83    0.86 
   2   8  -1    4.53    0.87 
   2   8  -1    5.30    0.82 
  -2   8   1    6.32    0.73 
   2   8  -1    8.11    0.98 
  -2   8   1    4.70    0.81 
   2   8  -1    7.78    1.02 
   2   8  -1    7.42    0.66 
   0  -8  -1   38.71    1.88 
   0  -8   1   34.86    1.90 
   0  -8   1   38.33    1.89 
   0  -8   1   37.91    1.67 
   0  -8  -1   38.96    1.57 
   0  -8  -1   35.60    1.86 
   0  -8   1   36.72    1.45 
   0  -8  -1   36.25    1.69 
   0  -8  -1   33.48    1.75 
   0  -8  -1   37.22    1.94 
   0  -8   1   37.21    1.84 
   0  -8  -1   33.69    1.85 
   0  -8   1   37.12    1.80 
   0  -8   1   39.19    1.98 
   0   8   1   38.53    1.91 
   0   8  -1   35.79    1.84 
   0   8  -1   36.92    1.76 
   0   8  -1   34.41    1.73 
   0   8  -1   39.24    1.95 
   0   8   1   36.75    1.89 
   0   8   1   40.62    1.90 
   0   8  -1   37.49    1.53 
   0   8   1   36.88    1.59 
   0   8   1   36.03    1.80 
   0   8  -1   38.75    1.86 
   2  -8   1   13.63    1.12 
  -2  -8  -1   17.07    1.27 
   2  -8   1   15.06    1.26 
  -2  -8  -1   15.96    1.19 
  -2  -8  -1   16.80    1.13 
  -2  -8  -1   13.69    1.21 
  -2  -8  -1   17.40    1.28 
   2  -8   1   17.12    1.12 
   2  -8   1   16.49    1.20 
  -2  -8  -1   17.95    1.06 
  -2  -8  -1   16.52    0.92 
   2  -8   1   16.48    0.87 
   2  -8   1   17.01    0.97 
   2  -8   1   14.98    1.18 
  -2  -8  -1   17.50    1.31 
   2   8   1   16.35    1.21 
  -2   8  -1   16.88    1.17 
   2   8   1   17.52    1.21 
  -2   8  -1   15.56    1.22 
   2   8   1   18.82    1.34 
   2   8   1   16.95    1.05 
  -2   8  -1   18.25    1.24 
   2   8   1   16.96    0.93 
   2   8   1   17.54    1.31 
  -2   8  -1   16.51    1.00 
  -4  -8  -1   13.99    1.13 
  -4  -8  -1   14.72    0.92 
  -4  -8  -1   15.63    1.28 
   4  -8   1   15.47    0.84 
  -4  -8  -1   15.83    1.13 
   4  -8   1   13.03    1.07 
  -4  -8  -1   12.10    1.20 
   4  -8   1   14.36    1.04 
  -4  -8  -1   16.29    1.36 
   4  -8   1   12.73    0.74 
   4  -8   1   15.38    1.19 
  -4  -8  -1   15.08    1.21 
   4  -8   1   15.94    1.00 
   4   8   1   13.96    1.12 
  -4   8  -1   17.81    1.09 
  -4   8  -1   14.22    0.81 
   4   8   1   15.23    1.29 
   4   8   1   17.00    1.04 
  -4   8  -1   15.14    1.26 
  -4   8  -1   15.11    1.12 
   4   8   1   14.59    1.28 
   4   8   1   14.38    0.97 
   4   8   1   15.70    1.32 
  -6  -8  -1   21.44    1.57 
  -6  -8  -1   23.80    1.53 
  -6  -8  -1   24.24    1.27 
   6  -8   1   21.83    0.96 
   6  -8   1   23.40    1.38 
   6  -8   1   21.12    1.24 
  -6  -8  -1   21.50    1.58 
  -6  -8  -1   18.66    1.48 
  -6  -8  -1   19.65    1.40 
   6  -8   1   22.30    1.10 
   6  -8   1   20.36    1.29 
  -6  -8  -1   21.96    1.44 
   6   8   1   24.20    1.61 
   6   8   1   21.34    1.32 
   6   8   1   22.85    1.63 
   6   8   1   23.63    1.36 
  -6   8  -1   21.78    1.20 
   6   8   1   23.07    1.61 
  -6   8  -1   20.89    1.26 
   6   8   1   21.00    1.29 
  -6   8  -1   20.71    1.45 
  -8  -8  -1   21.16    1.52 
  -8  -8  -1   21.20    1.46 
  -8  -8  -1   21.78    1.57 
   8  -8   1   21.60    1.23 
  -8  -8  -1   23.30    1.58 
   8  -8   1   23.59    1.38 
   8  -8   1   19.83    1.27 
  -8  -8  -1   20.60    1.60 
  -8  -8  -1   24.40    1.68 
  -8   8  -1   23.31    1.56 
   8   8   1   25.37    1.43 
   8   8   1   21.93    1.45 
  -8   8  -1   20.94    1.23 
   8   8   1   19.69    1.71 
  -8   8  -1   22.81    1.13 
   8   8   1   24.21    1.72 
   8   8   1   23.13    1.35 
   8   8   1   19.31    1.60 
  10  -8   1    7.79    0.83 
 -10  -8  -1    9.18    1.24 
  10  -8   1    9.34    1.24 
 -10  -8  -1    8.15    1.27 
 -10  -8  -1    8.65    1.17 
  10  -8   1    8.06    0.89 
 -10  -8  -1    6.07    1.06 
  10   8   1    8.37    1.26 
  10   8   1    9.64    1.06 
  10   8   1    7.05    1.29 
  10   8   1    7.64    0.88 
 -10   8  -1    7.24    0.58 
 -10   8  -1    6.94    0.76 
 -10   8  -1   10.13    1.20 
  12  -8   1   18.00    1.13 
 -12  -8  -1   19.14    1.74 
 -12  -8  -1   17.72    1.61 
 -12  -8  -1   18.61    1.62 
  12  -8   1   18.15    1.20 
  12  -8   1   19.86    1.62 
 -12   8  -1   18.80    0.80 
 -12   8  -1   17.55    1.48 
  12   8   1   16.82    1.18 
  12   8   1   17.82    1.74 
 -12   8  -1   15.77    0.94 
  12   8   1   17.72    1.42 
  14  -8   1   17.18    1.10 
 -14  -8  -1   14.59    1.77 
  14  -8   1   15.41    1.06 
  14  -8   1   15.01    1.52 
 -14  -8  -1   13.52    1.82 
 -14  -8  -1   12.24    1.45 
  14   8   1   14.29    1.42 
  14   8   1   12.00    1.77 
 -16  -8  -1    5.85    1.20 
  16  -8   1    6.79    0.77 
  16  -8   1    6.22    1.19 
 -16  -8  -1    7.28    1.65 
 -16  -8  -1    7.69    1.51 
  16   8   1    4.87    1.40 
  16   8   1    8.80    1.34 
  18  -8   1   -0.54    0.70 
 -18  -8  -1   -1.47    0.85 
  18   8   1   -0.66    0.87 
  18   8   1   -0.48    1.21 
  17  -9  -1    7.38    1.36 
 -17  -9   1    8.71    1.57 
 -17  -9   1    5.98    1.65 
  17   9  -1    8.78    1.47 
  15  -9  -1   16.02    1.27 
 -15  -9   1   15.17    1.68 
 -15  -9   1   14.40    1.70 
 -15  -9   1   15.54    1.96 
  15  -9  -1   18.85    1.73 
  15   9  -1   16.65    1.76 
  15   9  -1   15.01    2.47 
  15   9  -1   20.04    1.93 
 -15   9   1   17.94    1.70 
  13  -9  -1    8.98    1.42 
 -13  -9   1    9.68    1.47 
  13  -9  -1    7.56    1.00 
 -13  -9   1    6.35    1.26 
 -13  -9   1    8.05    1.59 
 -13   9   1    8.60    1.36 
  13   9  -1    7.74    1.61 
  13   9  -1   10.25    1.54 
  13   9  -1    8.94    1.35 
 -11  -9   1    2.61    1.03 
 -11  -9   1    2.93    0.98 
  11  -9  -1    3.12    0.66 
 -11  -9   1    3.95    0.92 
 -11   9   1    4.73    1.14 
  11   9  -1    2.59    1.06 
  11   9  -1    2.99    1.06 
 -11   9   1    3.62    0.50 
  11   9  -1    2.71    0.86 
 -11   9   1    3.14    0.61 
  -9  -9   1    3.99    0.95 
  -9  -9   1    2.78    0.98 
  -9  -9   1    3.41    0.85 
   9  -9  -1    4.00    0.90 
  -9   9   1    1.74    0.48 
   9   9  -1    2.92    0.77 
   9   9  -1    4.12    0.78 
  -9   9   1    3.27    0.85 
   9   9  -1    1.96    0.83 
  -9   9   1    3.63    0.70 
   9   9  -1    3.04    0.86 
   9   9  -1    1.98    0.89 
  -7  -9   1   26.04    1.64 
  -7  -9   1   26.99    1.89 
   7  -9  -1   28.28    1.56 
   7  -9  -1   24.83    1.24 
  -7  -9   1   25.36    1.78 
  -7  -9   1   27.81    1.68 
   7   9  -1   22.00    1.73 
  -7   9   1   24.19    1.38 
   7   9  -1   27.05    1.47 
  -7   9   1   25.97    1.75 
   7   9  -1   23.29    1.47 
   7   9  -1   27.74    1.55 
  -7   9   1   26.71    1.45 
   7   9  -1   20.93    1.74 
   7   9  -1   25.45    1.72 
   5  -9  -1   32.74    1.51 
  -5  -9   1   37.88    1.88 
  -5  -9   1   38.23    1.85 
  -5  -9   1   32.45    1.94 
  -5  -9   1   35.66    2.11 
   5  -9  -1   34.57    1.86 
   5  -9  -1   33.63    1.66 
   5   9  -1   32.47    1.65 
   5   9  -1   33.71    1.74 
  -5   9   1   33.03    1.71 
  -5   9   1   32.98    1.75 
  -5   9   1   33.21    1.40 
  -5   9   1   31.36    1.95 
   5   9  -1   40.00    1.77 
   5   9  -1   37.00    2.18 
   5   9  -1   34.07    2.00 
   5   9  -1   33.97    2.01 
   5   9  -1   37.00    2.10 
   3  -9  -1    0.13    0.46 
  -3  -9   1    0.30    0.34 
  -3  -9   1    0.78    0.58 
  -3  -9   1    0.89    0.70 
   3  -9  -1    0.01    0.53 
  -3  -9   1    0.47    0.51 
  -3  -9   1    0.71    0.50 
  -3  -9   1    0.61    0.42 
   3  -9  -1    0.56    0.42 
   3   9  -1    0.14    0.53 
   3   9  -1    0.22    0.47 
  -3   9   1    0.26    0.51 
   3   9  -1   -0.17    0.35 
   3   9  -1   -0.01    0.53 
   3   9  -1   -0.10    0.57 
  -3   9   1   -0.30    0.58 
   3   9  -1   -0.85    0.56 
   3   9  -1    0.00    0.52 
  -3   9   1    0.04    0.47 
   1  -9  -1   57.27    2.30 
  -1  -9   1   56.92    2.33 
  -1  -9   1   53.06    2.49 
   1  -9  -1   55.24    2.59 
   1  -9  -1   53.62    2.48 
  -1  -9   1   50.70    2.02 
  -1  -9   1   52.27    2.62 
  -1   9   1   47.15    2.43 
  -1   9   1   57.12    2.58 
  -1   9   1   53.84    2.49 
   1   9  -1   56.73    2.60 
   1   9  -1   54.85    2.45 
   1   9  -1   51.97    2.13 
  -1   9   1   49.55    2.72 
   1   9  -1   51.49    2.49 
   1  -9   1   -0.12    0.48 
  -1  -9  -1    0.52    0.40 
  -1  -9  -1    0.67    0.56 
  -1  -9  -1    0.09    0.59 
  -1  -9  -1    0.60    0.38 
   1  -9   1    0.93    0.43 
   1  -9   1    1.07    0.68 
  -1  -9  -1   -0.24    0.46 
   1   9   1    0.33    0.56 
   1   9   1    0.69    0.57 
  -1   9  -1    0.30    0.71 
   1   9   1   -0.17    0.44 
   1   9   1    0.49    0.61 
  -1   9  -1   -0.17    0.58 
  -1   9  -1    0.50    0.57 
  -1   9  -1    0.81    0.56 
  -3  -9  -1    0.67    0.54 
  -3  -9  -1    1.61    0.45 
   3  -9   1    0.20    0.58 
  -3  -9  -1    1.01    0.49 
   3  -9   1    1.26    0.44 
  -3  -9  -1    0.88    0.54 
   3  -9   1    0.81    0.48 
  -3  -9  -1    1.75    0.73 
  -3  -9  -1    1.25    0.63 
   3   9   1    0.95    0.43 
   3   9   1    1.36    0.69 
   3   9   1    1.74    0.59 
  -3   9  -1    1.93    0.61 
   3   9   1    1.69    0.64 
  -3   9  -1    1.59    0.56 
   3   9   1    1.45    0.67 
  -3   9  -1    0.67    0.56 
  -3   9  -1    1.94    0.68 
   3   9   1    0.44    0.59 
   5  -9   1    2.97    0.55 
  -5  -9  -1    3.67    0.75 
   5  -9   1    2.30    0.53 
  -5  -9  -1    3.83    0.87 
  -5  -9  -1    2.61    0.73 
  -5  -9  -1    2.79    0.67 
  -5  -9  -1    3.17    0.89 
   5  -9   1    2.22    0.69 
   5   9   1    1.04    0.88 
   5   9   1    2.31    0.78 
   5   9   1    1.68    0.55 
  -5   9  -1    1.93    0.59 
  -5   9  -1    2.08    0.46 
   5   9   1    2.06    0.76 
  -5   9  -1    3.35    0.81 
   5   9   1    3.67    0.88 
  -5   9  -1    2.76    0.62 
   5   9   1    2.62    0.68 
  -7  -9  -1   34.94    2.01 
  -7  -9  -1   35.38    1.98 
  -7  -9  -1   33.66    2.20 
   7  -9   1   36.66    1.93 
  -7  -9  -1   33.41    2.01 
   7   9   1   35.53    1.86 
  -7   9  -1   33.16    1.62 
  -7   9  -1   34.98    1.77 
   7   9   1   32.79    1.78 
   7   9   1   33.72    2.15 
   7   9   1   34.61    1.79 
  -7   9  -1   34.31    2.00 
   7   9   1   29.47    2.13 
   9  -9   1    5.62    0.94 
  -9  -9  -1    4.99    1.07 
  -9  -9  -1    6.90    1.17 
  -9  -9  -1    5.63    1.23 
   9   9   1    6.68    1.02 
   9   9   1    5.71    1.37 
   9   9   1    5.65    1.27 
  -9   9  -1    6.42    0.83 
   9   9   1    7.83    0.94 
  -9   9  -1    6.71    0.68 
  -9   9  -1    7.96    1.18 
  11  -9   1    0.56    0.84 
 -11  -9  -1    0.19    0.68 
 -11  -9  -1    1.05    0.93 
  11  -9   1   -0.05    0.57 
 -11  -9  -1   -0.03    0.72 
 -11   9  -1    0.11    0.68 
  11   9   1    0.76    0.86 
  11   9   1    0.04    0.70 
 -11   9  -1    0.69    0.44 
 -11   9  -1    0.46    0.29 
  13  -9   1    3.18    0.97 
 -13  -9  -1    4.78    1.21 
 -13  -9  -1    2.81    1.05 
 -13  -9  -1    3.85    0.99 
  13  -9   1    3.68    0.94 
  13   9   1    4.86    1.09 
 -13   9  -1    2.57    0.56 
  13   9   1    3.71    1.22 
  15  -9   1    2.95    0.98 
 -15  -9  -1    0.98    0.96 
 -15  -9  -1    1.03    1.03 
 -15  -9  -1    1.89    0.98 
  15  -9   1    1.76    0.61 
  15   9   1    1.54    0.93 
 -17  -9  -1    0.56    0.98 
 -17  -9  -1    0.33    1.02 
  17  -9   1    1.18    0.88 
  17   9   1    0.92    1.01 
 -16 -10   1    2.76    1.54 
  16 -10  -1    1.47    1.06 
  16 -10  -1    2.51    0.70 
 -16 -10   1    2.92    1.34 
  16  10  -1    3.88    1.16 
  14 -10  -1    4.59    1.23 
 -14 -10   1    3.54    1.28 
 -14 -10   1    4.28    1.31 
  14 -10  -1    2.83    0.80 
 -14  10   1    4.69    1.16 
  14  10  -1    4.67    1.14 
  12 -10  -1    1.23    0.75 
 -12 -10   1    0.58    0.98 
 -12 -10   1    1.71    1.15 
 -12 -10   1    0.39    0.94 
  12 -10  -1    1.82    0.97 
 -12  10   1    2.84    0.98 
  12  10  -1    1.04    0.90 
 -12  10   1    1.30    0.43 
 -10 -10   1    0.15    0.67 
 -10 -10   1   -0.19    0.79 
 -10 -10   1   -0.05    0.68 
  10 -10  -1    0.03    0.65 
 -10  10   1   -0.04    0.77 
 -10  10   1   -0.85    0.55 
 -10  10   1    0.27    0.46 
  10  10  -1    0.91    0.77 
  -8 -10   1    2.15    0.80 
  -8 -10   1    2.49    1.00 
   8 -10  -1    2.34    0.77 
  -8 -10   1    1.57    0.72 
  -8  10   1    2.21    0.54 
   8  10  -1    2.11    0.81 
  -8  10   1    1.25    0.56 
  -8  10   1    2.51    0.86 
   8  10  -1    2.86    0.71 
  -6 -10   1   24.85    2.03 
  -6 -10   1   24.46    1.74 
   6 -10  -1   23.63    1.70 
  -6  10   1   23.05    1.82 
  -6  10   1   27.30    1.57 
  -6  10   1   24.88    1.53 
   6  10  -1   26.32    1.55 
   6  10  -1   22.64    1.84 
   6  10  -1   26.91    1.54 
   4 -10  -1    0.28    0.47 
  -4 -10   1   -0.28    0.54 
  -4 -10   1   -0.26    0.68 
   4 -10  -1   -0.07    0.59 
   4 -10  -1    0.03    0.51 
  -4  10   1    0.24    0.55 
  -4  10   1   -0.05    0.69 
   4  10  -1   -0.10    0.63 
  -4  10   1   -0.01    0.49 
   4  10  -1   -0.59    0.53 
   4  10  -1   -0.29    0.54 
  -2 -10   1   -0.02    0.51 
  -2 -10   1   -0.01    0.67 
   2 -10  -1    0.06    0.66 
   2 -10  -1    0.34    0.48 
  -2  10   1    0.12    0.67 
  -2  10   1    0.26    0.57 
   2  10  -1    0.42    0.63 
   2  10  -1    0.06    0.60 
   2  10  -1    0.02    0.48 
  -2  10   1    0.31    0.57 
   0 -10  -1    3.49    0.72 
   0 -10  -1    3.22    0.60 
   0 -10  -1    6.41    1.18 
   0 -10   1    3.82    0.84 
   0 -10   1    5.06    1.19 
   0  10   1    3.75    0.88 
   0  10   1    6.19    1.09 
   0  10  -1    5.17    1.03 
   0  10  -1    3.87    0.92 
   0  10  -1    5.38    1.02 
   0  10   1    4.61    1.18 
   2 -10   1   16.97    1.62 
  -2 -10  -1   17.28    1.60 
  -2 -10  -1   14.92    1.33 
  -2 -10  -1   14.49    0.98 
   2 -10   1   14.44    1.10 
   2  10   1   14.76    1.46 
   2  10   1   15.41    1.35 
  -2  10  -1   14.99    1.30 
  -2  10  -1   17.60    1.43 
   2  10   1   16.80    1.14 
  -2  10  -1   15.34    1.33 
  -2  10  -1   13.76    1.33 
  -4 -10  -1    0.32    0.60 
  -4 -10  -1    0.99    0.49 
  -4 -10  -1    1.04    0.83 
   4 -10   1    0.78    0.76 
   4 -10   1    0.22    0.64 
  -4  10  -1    0.93    0.63 
  -4  10  -1    1.53    0.69 
   4  10   1    0.84    0.65 
   4  10   1    1.39    0.64 
   4  10   1   -0.11    0.66 
  -4  10  -1    0.52    0.54 
  -6 -10  -1    0.91    0.89 
   6 -10   1    0.03    0.65 
  -6 -10  -1    2.14    0.75 
  -6 -10  -1    0.84    0.68 
   6  10   1    1.61    0.70 
   6  10   1    0.69    0.73 
   6  10   1    0.75    0.67 
  -6  10  -1    1.84    0.78 
  -6  10  -1    0.36    0.54 
  -6  10  -1    0.35    0.57 
  -8 -10  -1    0.36    0.71 
  -8 -10  -1    0.64    0.71 
  -8 -10  -1    0.02    0.80 
   8 -10   1    0.07    0.63 
   8  10   1    0.35    0.59 
   8  10   1   -0.01    0.70 
  -8  10  -1    1.15    0.74 
  -8  10  -1    0.61    0.57 
  -8  10  -1    0.62    0.42 
 -10 -10  -1    4.40    0.99 
  10 -10   1    4.32    1.15 
 -10 -10  -1    4.64    1.28 
 -10 -10  -1    4.09    1.13 
  10 -10   1    3.47    0.89 
 -10  10  -1    6.98    1.27 
 -10  10  -1    4.69    0.83 
  10  10   1    5.76    1.13 
 -12 -10  -1    1.63    1.18 
 -12 -10  -1    0.01    0.88 
  12 -10   1    0.94    0.77 
  12 -10   1    0.90    0.98 
 -12 -10  -1    1.07    0.96 
 -12  10  -1    1.62    0.91 
  12  10   1   -0.06    0.89 
 -12  10  -1    0.65    0.46 
  14 -10   1    0.80    0.96 
  14 -10   1    0.73    0.74 
 -14 -10  -1    0.02    1.03 
 -14 -10  -1    2.51    1.13 
  14  10   1    1.35    1.04 
  11 -11  -1    0.84    0.70 
 -11 -11   1    0.18    1.08 
 -11 -11   1    1.18    1.08 
 -11  11   1    0.31    0.89 
 -11  11   1    0.77    0.49 
  11  11  -1   -0.24    0.86 
  -9 -11   1    0.22    0.85 
  -9 -11   1   -0.01    1.06 
   9 -11  -1    0.20    0.72 
  -9  11   1   -0.51    0.74 
  -9  11   1    0.80    0.59 
   9  11  -1   -0.04    0.79 
  -7 -11   1    2.67    1.14 
  -7 -11   1    3.60    1.00 
   7 -11  -1    5.34    1.23 
  -7  11   1    4.12    1.12 
   7  11  -1    4.82    1.14 
  -7  11   1    5.97    1.03 
  -5 -11   1    3.61    0.91 
   5 -11  -1    5.74    1.25 
  -5 -11   1    3.77    1.11 
  -5  11   1    4.54    1.04 
  -5  11   1    3.91    1.01 
   5  11  -1    4.62    0.99 
  -5  11   1    6.14    1.38 
   5  11  -1    6.80    1.42 
   5  11  -1    5.42    1.05 
  -3 -11   1    1.98    0.74 
   3 -11  -1    0.74    0.79 
  -3 -11   1    1.25    0.97 
  -3  11   1    0.60    0.65 
  -3  11   1    1.03    0.86 
   3  11  -1    1.09    0.62 
  -3  11   1    3.12    0.79 
   3  11  -1    2.24    0.81 
   3  11  -1    1.16    0.77 
   1 -11  -1   14.21    1.48 
  -1 -11   1   10.71    1.67 
   1 -11  -1   14.38    1.63 
  -1 -11   1   13.33    1.37 
   1  11  -1   13.88    1.44 
   1  11  -1   15.82    1.51 
  -1  11   1   14.49    1.42 
   1  11  -1   17.16    1.43 
  -1  11   1   14.29    1.46 
  -1 -11  -1    5.14    1.25 
  -1 -11  -1    5.30    1.17 
   1 -11   1    4.79    1.10 
   1  11   1    4.42    1.00 
  -1  11  -1    5.01    1.16 
  -1  11  -1    4.74    1.09 
   1  11   1    4.99    1.14 
  -1  11  -1    4.78    1.09 
  -3 -11  -1    6.78    1.12 
   3 -11   1    5.06    1.12 
  -3 -11  -1    6.74    1.65 
  -3  11  -1    4.38    1.08 
   3  11   1    4.94    1.27 
   3  11   1    4.80    1.10 
  -3  11  -1    4.59    0.99 
   3  11   1    4.32    0.88 
  -5 -11  -1    0.06    0.81 
  -5 -11  -1   -0.33    0.69 
   5 -11   1    1.41    0.81 
   5  11   1   -0.29    0.75 
   5  11   1    0.19    0.65 
  -5  11  -1    1.04    0.77 
   5  11   1    0.34    0.71 
  -5  11  -1    0.03    0.58 
  -7 -11  -1    6.17    1.32 
   7 -11   1    4.18    1.15 
  -7 -11  -1    5.75    1.15 
   7  11   1    7.38    1.18 
  -7  11  -1    3.68    0.95 
  -7  11  -1    3.73    1.09 
  -9 -11  -1   13.59    1.86 
   9 -11   1   10.19    1.42 
  -9 -11  -1   11.46    1.66 
   9 -11   1   12.38    1.78 
   9  11   1    9.97    1.39 
  -9  11  -1   10.48    1.48 
  -9  11  -1   11.56    1.16 
  11 -11   1   11.22    2.02 
  11 -11   1   12.49    1.39 
 -11 -11  -1   12.80    2.08 
  11  11   1   11.80    1.58 
 -11  11  -1   12.33    1.16 
 -11  11  -1   11.30    1.57 
   8 -12  -1    2.64    1.21 
  -8 -12   1    2.10    1.14 
  -8 -12   1    1.30    1.13 
   8  12  -1    1.56    0.93 
  -8  12   1    1.54    1.12 
   6 -12  -1    3.68    1.06 
  -6 -12   1    2.97    1.31 
  -6  12   1    3.42    1.16 
   4 -12  -1    4.08    1.13 
  -4 -12   1    3.03    1.38 
  -4  12   1    4.05    1.08 
   2 -12  -1    3.32    1.25 
  -2 -12   1    4.41    1.20 
   2  12  -1    3.34    0.96 
  -2  12   1    3.77    1.25 
   2  12  -1    4.09    1.13 
   2  12  -1    3.58    0.97 
  -2  12   1    2.88    0.97 
  -2  12   1    4.27    1.30 
   0 -12  -1    9.78    1.88 
   0 -12   1   10.11    1.81 
   0  12  -1   11.51    1.41 
   0  12   1    9.65    1.53 
   0  12   1   10.85    1.53 
   0  12  -1    9.81    1.46 
   2 -12   1   10.11    1.80 
  -2 -12  -1   16.31    1.84 
   2  12   1   11.61    1.65 
   2  12   1   13.33    1.67 
  -2  12  -1   15.42    1.68 
  -2  12  -1   13.12    2.15 
  -4 -12  -1    0.20    0.80 
   4 -12   1    0.60    0.96 
  -4 -12  -1   -0.09    0.92 
   4  12   1    0.11    0.71 
  -4  12  -1    0.55    0.76 
   4  12   1    0.87    1.10 
  -6 -12  -1    0.30    0.99 
   6 -12   1   -0.27    0.83 
  -6 -12  -1    0.64    0.90 
  -6  12  -1   -0.74    0.80 
   6  12   1   -0.37    0.78 
  26   0  -2   18.96    2.23 
 -26   0   2   23.72    1.90 
 -26   0   2   22.85    1.82 
 -24   0   2    1.16    0.78 
  24   0  -2    0.49    0.91 
  24   0  -2    2.56    0.99 
 -24   0   2    0.87    0.58 
 -24   0   2    1.13    1.23 
 -24   0   2    0.64    0.76 
 -24   0   2    0.74    0.70 
 -22   0   2    5.40    0.94 
 -22   0   2    3.59    0.77 
 -22   0   2    5.00    1.32 
  22   0  -2    3.63    0.87 
 -22   0   2    2.84    0.71 
 -22   0   2    4.60    1.05 
  22   0  -2    3.77    0.95 
  20   0  -2    0.42    0.63 
 -20   0   2   -0.13    0.41 
  20   0  -2    0.41    0.59 
 -20   0   2   -1.63    0.41 
 -20   0   2   -0.23    0.46 
  20   0  -2   -0.22    0.42 
 -20   0   2    0.52    0.77 
  20   0  -2   -0.70    0.51 
 -20   0   2    0.28    0.56 
 -18   0   2   22.72    1.35 
 -18   0   2   19.87    1.14 
  18   0  -2   20.76    1.19 
  18   0  -2   18.19    1.25 
 -18   0   2   18.83    1.67 
  18   0  -2   17.26    1.23 
 -18   0   2   18.26    1.22 
 -18   0   2   19.00    1.04 
  18   0  -2   18.94    1.37 
  18   0  -2   20.21    1.34 
 -18   0   2   18.07    1.21 
 -18   0   2   20.18    0.84 
 -18   0   2   18.11    0.89 
  16   0  -2  114.85    4.30 
 -16   0   2  118.18    4.17 
  16   0  -2  110.49    4.16 
 -16   0   2  106.42    3.75 
 -16   0   2  115.32    4.13 
  16   0  -2  110.60    4.01 
  16   0  -2  122.28    4.18 
 -16   0   2  113.76    4.14 
 -16   0   2  112.10    4.59 
  16   0  -2  116.20    4.07 
 -16   0   2  112.04    3.87 
  16   0  -2  110.57    4.15 
 -16   0   2  109.38    3.94 
 -16   0   2  113.22    4.07 
  16   0  -2  109.88    4.14 
  14   0  -2  149.28    5.13 
 -14   0   2  148.77    4.85 
 -14   0   2  148.09    5.13 
  14   0  -2  149.06    5.21 
 -14   0   2  143.10    5.00 
 -14   0   2  143.79    5.17 
 -14   0   2  150.87    5.18 
  14   0  -2  149.91    5.32 
 -14   0   2  153.50    5.23 
 -14   0   2  145.64    4.97 
  14   0  -2  155.15    5.20 
 -14   0   2  147.06    5.58 
  14   0  -2  144.67    5.08 
  14   0  -2  148.26    5.19 
  14   0  -2  137.48    5.47 
  14   0  -2  144.28    5.19 
 -12   0   2   53.96    1.96 
  12   0  -2   56.53    2.24 
 -12   0   2   52.83    2.07 
  12   0  -2   55.09    2.41 
  12   0  -2   53.49    2.10 
 -12   0   2   51.95    2.11 
 -12   0   2   54.71    2.44 
  12   0  -2   52.16    2.04 
  12   0  -2   53.79    2.13 
 -12   0   2   55.10    1.96 
  12   0  -2   54.03    1.97 
  12   0  -2   55.47    2.08 
 -12   0   2   53.60    2.09 
  12   0  -2   51.26    2.11 
 -12   0   2   55.33    2.15 
  12   0  -2   54.63    2.12 
 -12   0   2   54.21    1.83 
 -10   0   2   38.80    1.51 
  10   0  -2   43.39    1.66 
  10   0  -2   42.09    1.63 
  10   0  -2   40.08    1.61 
 -10   0   2   39.64    1.63 
 -10   0   2   40.01    1.47 
  10   0  -2   39.54    1.49 
 -10   0   2   42.13    1.38 
 -10   0   2   39.46    1.53 
 -10   0   2   39.03    1.63 
 -10   0   2   39.22    1.50 
  10   0  -2   39.12    1.71 
  10   0  -2   39.89    1.62 
  10   0  -2   41.09    1.62 
  10   0  -2   41.02    1.59 
 -10   0   2   41.67    1.90 
  10   0  -2   42.46    1.60 
 -10   0   2   43.22    1.63 
  10   0  -2   42.84    1.87 
 -10   0   2   40.50    1.60 
  -8   0   2    0.18    0.18 
  -8   0   2   -0.03    0.28 
  -8   0   2   -0.42    0.20 
   8   0  -2    0.04    0.18 
  -8   0   2    0.14    0.23 
  -8   0   2    0.02    0.19 
   8   0  -2    0.10    0.17 
   8   0  -2    0.34    0.20 
   8   0  -2    0.05    0.20 
  -8   0   2    0.30    0.20 
  -8   0   2    0.00    0.14 
   8   0  -2    0.17    0.29 
   8   0  -2    0.25    0.25 
   8   0  -2    0.08    0.19 
  -8   0   2   -0.23    0.18 
   8   0  -2    0.28    0.21 
  -8   0   2    0.06    0.12 
  -8   0   2   -0.08    0.15 
   8   0  -2    0.01    0.12 
  -8   0   2    0.13    0.08 
   8   0  -2    0.19    0.21 
   6   0  -2   39.98    1.54 
  -6   0   2   39.91    1.64 
   6   0  -2   39.60    1.49 
  -6   0   2   37.55    1.46 
  -6   0   2   41.84    1.49 
   6   0  -2   41.39    1.46 
  -6   0   2   39.64    1.52 
   6   0  -2   40.56    1.47 
  -6   0   2   39.83    1.45 
  -6   0   2   40.43    1.46 
   6   0  -2   38.32    1.46 
   6   0  -2   41.50    1.47 
   6   0  -2   40.07    1.36 
   6   0  -2   39.19    1.45 
   6   0  -2   38.59    1.46 
  -6   0   2   38.50    1.43 
   6   0  -2   39.91    1.34 
  -6   0   2   39.94    1.43 
  -6   0   2   39.38    1.35 
  -6   0   2   38.65    1.47 
   6   0  -2   40.67    1.64 
  -6   0   2   39.74    1.42 
   4   0  -2  228.06    7.53 
   4   0  -2  233.97    7.55 
   4   0  -2  227.48    7.45 
  -4   0   2  229.00    7.65 
   4   0  -2  225.62    7.53 
  -4   0   2  231.84    7.55 
   4   0  -2  226.32    7.57 
  -4   0   2  227.83    7.52 
  -4   0   2  234.77    7.53 
   4   0  -2  229.85    7.52 
  -4   0   2  232.63    7.53 
   4   0  -2  235.10    7.65 
  -4   0   2  235.46    7.53 
   4   0  -2  232.34    7.53 
  -4   0   2  229.73    7.50 
   4   0  -2  227.38    7.53 
   4   0  -2  237.31    7.53 
   2   0  -2  238.98    7.71 
   2   0  -2  229.90    7.71 
   2   0  -2  242.82    7.70 
  -2   0   2  241.31    7.69 
  -2   0   2  239.21    7.71 
   2   0  -2  238.98    7.72 
   2   0  -2  239.13    7.74 
  -2   0   2  233.48    7.70 
   2   0  -2  236.98    7.71 
  -2   0   2  228.40    7.68 
  -2   0   2  246.85    7.72 
   2   0  -2  236.37    7.71 
  -2   0   2  239.53    7.70 
   0   0  -2   63.02    2.08 
   0   0  -2   59.90    2.09 
   0   0   2   63.48    2.08 
   0   0  -2   62.26    2.07 
   0   0   2   63.73    2.10 
   0   0  -2   63.17    2.08 
   0   0   2   64.08    2.08 
   0   0  -2   64.03    2.08 
   0   0   2   62.29    2.07 
   0   0   2   63.66    2.08 
   2   0   2    9.45    0.40 
  -2   0  -2    9.28    0.37 
  -2   0  -2    8.99    0.39 
  -2   0  -2    8.66    0.40 
  -2   0  -2    8.51    0.37 
   2   0   2    9.17    0.38 
  -2   0  -2    8.45    0.35 
   2   0   2    8.43    0.41 
   2   0   2    9.09    0.44 
  -2   0  -2    8.73    0.40 
  -2   0  -2    8.90    0.40 
   2   0   2    9.01    0.39 
   2   0   2    8.76    0.36 
  -2   0  -2    8.26    0.44 
   2   0   2    9.06    0.37 
   2   0   2    8.53    0.39 
  -2   0  -2    8.74    0.41 
   2   0   2    9.31    0.40 
  -4   0  -2  366.83   12.25 
  -4   0  -2  387.00   12.27 
  -4   0  -2  376.50   12.27 
  -4   0  -2  365.23   12.27 
   4   0   2  377.27   12.28 
   4   0   2  380.91   12.29 
  -4   0  -2  371.09   12.26 
  -4   0  -2  395.96   12.30 
  -4   0  -2  364.20   12.23 
   4   0   2  372.74   12.30 
   4   0   2  377.99   12.25 
   4   0   2  389.86   12.37 
   4   0   2  373.86   12.22 
   4   0   2  369.65   12.24 
  -4   0  -2  377.25   12.23 
   4   0   2  371.72   12.25 
  -4   0  -2  385.61   12.21 
   4   0   2  384.66   12.27 
  -4   0  -2  382.72   12.38 
  -6   0  -2    1.73    0.34 
  -6   0  -2    1.24    0.31 
  -6   0  -2    1.73    0.43 
   6   0   2    1.45    0.31 
   6   0   2    1.58    0.30 
  -6   0  -2    1.31    0.26 
   6   0   2    1.18    0.21 
   6   0   2    1.59    0.28 
   6   0   2    1.57    0.39 
  -6   0  -2    1.08    0.26 
  -6   0  -2    1.21    0.20 
   6   0   2    1.56    0.29 
  -6   0  -2    1.16    0.28 
  -6   0  -2    1.20    0.22 
   6   0   2    1.65    0.26 
   6   0   2    1.42    0.34 
   6   0   2    1.51    0.30 
  -6   0  -2    1.18    0.25 
   6   0   2    1.47    0.31 
   8   0   2  135.92    4.56 
   8   0   2  132.82    4.55 
   8   0   2  131.63    4.45 
  -8   0  -2  129.58    4.52 
   8   0   2  136.53    4.57 
   8   0   2  132.50    4.62 
   8   0   2  135.83    4.53 
   8   0   2  137.16    4.55 
  -8   0  -2  129.44    4.53 
  -8   0  -2  136.11    4.56 
  -8   0  -2  134.14    4.58 
  -8   0  -2  136.47    4.63 
  -8   0  -2  135.04    4.59 
   8   0   2  133.85    4.75 
  -8   0  -2  133.08    4.80 
   8   0   2  138.25    4.58 
  -8   0  -2  131.45    4.55 
  -8   0  -2  132.80    4.34 
  -8   0  -2  132.93    4.44 
   8   0   2  131.16    4.57 
  10   0   2   75.32    2.76 
  10   0   2   77.63    2.77 
  10   0   2   75.03    2.77 
 -10   0  -2   77.95    2.79 
 -10   0  -2   71.42    2.72 
  10   0   2   76.35    2.71 
  10   0   2   74.93    2.82 
  10   0   2   76.72    2.75 
 -10   0  -2   71.31    2.77 
 -10   0  -2   73.17    2.72 
  10   0   2   78.33    2.78 
  10   0   2   77.28    2.99 
 -10   0  -2   78.78    2.60 
 -10   0  -2   74.66    2.71 
  10   0   2   75.55    2.61 
  10   0   2   73.83    2.72 
 -10   0  -2   75.85    3.06 
 -12   0  -2  211.73    7.06 
  12   0   2  209.66    7.27 
 -12   0  -2  211.60    7.20 
  12   0   2  212.17    7.27 
 -12   0  -2  214.56    7.23 
  12   0   2  216.99    7.19 
 -12   0  -2  212.43    7.30 
  12   0   2  212.42    7.29 
 -12   0  -2  217.66    7.30 
 -12   0  -2  218.01    7.10 
 -12   0  -2  214.32    7.65 
  12   0   2  222.11    7.29 
  12   0   2  214.64    7.54 
 -12   0  -2  212.35    7.22 
  12   0   2  213.60    7.24 
  12   0   2  206.39    7.33 
 -14   0  -2    1.20    0.63 
  14   0   2    1.43    0.45 
 -14   0  -2    1.17    0.39 
  14   0   2    1.89    0.47 
 -14   0  -2    0.70    0.34 
  14   0   2    1.92    0.54 
 -14   0  -2    1.75    0.50 
  14   0   2    1.14    0.39 
  14   0   2    1.28    0.35 
  14   0   2    1.34    0.56 
 -14   0  -2    0.60    0.38 
 -14   0  -2    0.60    0.34 
 -14   0  -2    1.54    0.35 
 -14   0  -2    1.34    0.34 
  14   0   2    0.74    0.40 
  14   0   2    2.25    0.48 
 -16   0  -2    8.78    0.90 
 -16   0  -2    8.57    0.88 
 -16   0  -2    9.59    0.77 
 -16   0  -2    8.19    0.59 
  16   0   2    6.40    0.81 
  16   0   2    8.35    0.90 
 -16   0  -2    8.34    0.57 
 -16   0  -2    8.23    0.77 
 -16   0  -2    7.68    1.17 
  16   0   2    7.05    0.79 
  16   0   2    8.02    0.90 
  16   0   2    6.30    0.80 
 -18   0  -2    1.84    0.86 
  18   0   2    1.95    0.58 
  18   0   2    1.66    0.62 
 -18   0  -2    2.22    0.50 
 -18   0  -2    2.43    0.59 
 -18   0  -2    2.87    0.70 
  18   0   2    1.66    0.70 
 -18   0  -2    1.59    0.58 
 -18   0  -2    2.56    0.53 
 -20   0  -2   -0.11    0.42 
 -20   0  -2    0.65    0.60 
  20   0   2   -0.33    0.58 
  20   0   2   -0.30    0.66 
  20   0   2    0.71    0.64 
 -20   0  -2   -0.18    0.60 
 -20   0  -2   -0.16    0.56 
 -20   0  -2    0.07    0.38 
 -20   0  -2   -0.34    0.82 
 -22   0  -2   17.47    1.23 
 -22   0  -2   17.14    2.06 
 -22   0  -2   18.62    1.55 
 -22   0  -2   19.45    1.44 
 -22   0  -2   17.53    1.73 
  22   0   2   17.32    1.53 
  22   0   2   17.00    1.76 
 -24   0  -2   31.48    1.95 
  24   0   2   29.12    2.00 
  24   0   2   28.43    2.29 
 -24   0  -2   28.94    2.26 
 -24   0  -2   22.82    3.04 
  25  -1  -2    2.17    0.86 
 -25  -1   2    0.48    0.93 
  25  -1  -2    0.80    1.03 
 -25  -1   2    0.36    0.76 
  25   1  -2    2.66    1.09 
 -25   1   2    0.99    0.81 
 -25   1   2    0.55    1.05 
  25   1  -2    1.91    1.00 
 -25   1   2    1.72    0.87 
 -25   1   2    0.95    0.53 
 -23  -1   2   -0.17    0.62 
 -23  -1   2    0.21    0.57 
 -23  -1   2    0.14    0.65 
  23  -1  -2    0.22    0.67 
  23  -1  -2   -0.50    0.71 
 -23  -1   2   -0.14    0.90 
 -23  -1   2    0.23    0.62 
 -23   1   2   -0.10    0.42 
 -23   1   2   -0.52    0.48 
  23   1  -2    0.01    0.79 
 -23   1   2   -0.19    0.95 
 -23   1   2    0.66    0.67 
  23   1  -2    0.16    0.82 
 -23   1   2   -0.24    0.61 
 -21  -1   2    1.94    0.94 
 -21  -1   2    0.58    0.71 
 -21  -1   2    1.18    0.61 
 -21  -1   2    1.58    0.59 
  21  -1  -2    0.89    0.71 
 -21  -1   2    1.05    0.61 
  21  -1  -2    0.52    0.62 
 -21   1   2    0.61    0.59 
 -21   1   2    0.70    0.51 
  21   1  -2    1.50    0.64 
  21   1  -2    1.50    0.79 
 -21   1   2    3.31    0.99 
  21   1  -2    1.28    0.74 
  21   1  -2    2.25    0.80 
 -21   1   2    1.74    0.69 
 -21   1   2    1.78    0.49 
 -19  -1   2    0.36    0.51 
 -19  -1   2    0.41    0.23 
  19  -1  -2    0.66    0.42 
 -19  -1   2    0.50    0.52 
  19  -1  -2   -0.44    0.47 
 -19  -1   2   -0.21    0.57 
  19  -1  -2    0.53    0.61 
  19  -1  -2   -0.51    0.57 
  19  -1  -2    0.75    0.50 
 -19  -1   2    0.82    0.50 
 -19  -1   2    0.82    0.71 
 -19   1   2    0.58    0.49 
 -19   1   2    0.64    0.39 
 -19   1   2    0.94    0.55 
  19   1  -2    0.04    0.47 
  19   1  -2    0.86    0.68 
  19   1  -2   -0.36    0.54 
  19   1  -2    0.36    0.59 
 -19   1   2    0.49    0.42 
 -19   1   2    0.56    0.30 
 -19   1   2    0.84    0.76 
  17  -1  -2   38.94    1.94 
 -17  -1   2   37.58    1.79 
 -17  -1   2   38.89    1.92 
 -17  -1   2   40.06    1.89 
 -17  -1   2   38.93    1.37 
 -17  -1   2   40.70    1.81 
 -17  -1   2   37.07    2.24 
  17  -1  -2   36.93    1.63 
  17  -1  -2   39.34    1.77 
  17  -1  -2   38.21    1.76 
  17  -1  -2   38.40    1.73 
 -17  -1   2   36.12    1.55 
  17  -1  -2   36.86    1.72 
 -17  -1   2   37.01    1.62 
  17  -1  -2   35.61    1.59 
  17  -1  -2   40.23    1.61 
 -17   1   2   38.20    2.19 
  17   1  -2   39.62    1.88 
  17   1  -2   35.41    1.89 
 -17   1   2   39.47    1.81 
 -17   1   2   37.63    1.62 
 -17   1   2   36.62    1.74 
  17   1  -2   35.77    1.96 
  17   1  -2   39.94    1.98 
  17   1  -2   42.12    1.96 
 -17   1   2   36.68    1.43 
  17   1  -2   36.20    1.80 
 -17   1   2   41.44    1.73 
  15  -1  -2   91.72    3.75 
 -15  -1   2   94.37    3.45 
 -15  -1   2   90.18    3.21 
  15  -1  -2   88.94    3.19 
 -15  -1   2   94.87    3.05 
  15  -1  -2   87.03    3.37 
  15  -1  -2   92.17    3.35 
  15  -1  -2   92.17    3.23 
  15  -1  -2   92.58    3.53 
  15  -1  -2   95.06    3.34 
 -15  -1   2   91.72    3.40 
  15  -1  -2   91.68    3.25 
  15  -1  -2   89.80    3.07 
  15  -1  -2   89.26    3.34 
 -15  -1   2   88.47    3.49 
 -15  -1   2   87.23    3.86 
 -15  -1   2   92.40    3.51 
  15   1  -2   90.09    3.41 
  15   1  -2   95.02    3.55 
  15   1  -2   94.47    3.46 
  15   1  -2   89.54    3.50 
 -15   1   2   88.29    3.77 
 -15   1   2   90.63    3.32 
 -15   1   2   87.61    3.39 
  15   1  -2   94.62    3.50 
 -15   1   2   90.31    3.11 
 -15   1   2   93.39    3.26 
 -15   1   2   89.60    3.03 
  15   1  -2   88.63    3.56 
  15   1  -2   95.47    3.51 
 -15   1   2   91.98    3.38 
  13  -1  -2    2.93    0.26 
 -13  -1   2    3.35    0.22 
 -13  -1   2    3.03    0.47 
 -13  -1   2    3.46    0.64 
 -13  -1   2    3.39    0.25 
  13  -1  -2    2.97    0.58 
  13  -1  -2    2.90    0.38 
  13  -1  -2    3.62    0.51 
 -13  -1   2    3.67    0.81 
  13  -1  -2    2.82    0.40 
 -13  -1   2    3.22    0.37 
 -13  -1   2    3.06    0.47 
 -13  -1   2    3.51    0.54 
 -13  -1   2    3.18    0.56 
  13  -1  -2    2.01    0.54 
  13  -1  -2    3.44    0.49 
 -13  -1   2    3.10    0.62 
  13  -1  -2    3.15    0.52 
  13  -1  -2    3.65    0.42 
  13  -1  -2    3.39    0.52 
  13   1  -2    3.74    0.61 
 -13   1   2    2.22    0.45 
 -13   1   2    2.64    0.33 
  13   1  -2    2.21    0.50 
 -13   1   2    3.27    0.24 
 -13   1   2    2.57    0.43 
 -13   1   2    3.55    0.75 
  13   1  -2    2.94    0.59 
  13   1  -2    2.51    0.52 
 -13   1   2    3.67    0.53 
  13   1  -2    2.77    0.55 
 -13   1   2    2.53    0.48 
 -13   1   2    2.33    0.26 
  13   1  -2    3.18    0.74 
  13   1  -2    3.73    0.66 
  13   1  -2    2.34    0.50 
 -11  -1   2    5.22    0.59 
 -11  -1   2    5.49    0.55 
 -11  -1   2    5.05    0.52 
  11  -1  -2    5.04    0.69 
 -11  -1   2    5.86    0.30 
  11  -1  -2    5.20    0.39 
 -11  -1   2    5.58    0.80 
 -11  -1   2    6.16    0.64 
  11  -1  -2    5.59    0.30 
  11  -1  -2    5.12    0.40 
 -11  -1   2    5.42    0.62 
  11  -1  -2    5.29    0.26 
  11  -1  -2    5.71    0.47 
  11  -1  -2    4.32    0.50 
  11  -1  -2    5.24    0.47 
  11  -1  -2    5.09    0.41 
 -11  -1   2    6.29    0.53 
 -11  -1   2    5.39    0.39 
 -11  -1   2    5.80    0.32 
  11  -1  -2    6.16    0.65 
  11  -1  -2    4.79    0.47 
 -11   1   2    4.93    0.27 
 -11   1   2    4.99    0.48 
  11   1  -2    4.66    0.46 
 -11   1   2    5.30    0.37 
  11   1  -2    5.61    0.63 
  11   1  -2    5.83    0.61 
 -11   1   2    5.14    0.52 
  11   1  -2    5.11    0.61 
  11   1  -2    6.38    0.63 
  11   1  -2    5.54    0.67 
 -11   1   2    5.76    0.55 
 -11   1   2    5.73    0.46 
 -11   1   2    4.65    0.70 
  11   1  -2    5.37    0.65 
  11   1  -2    6.77    0.67 
  11   1  -2    5.92    0.76 
 -11   1   2    5.44    0.29 
   9  -1  -2   12.52    0.61 
   9  -1  -2   11.71    0.57 
  -9  -1   2   12.93    0.50 
  -9  -1   2   13.35    0.73 
   9  -1  -2   12.97    0.76 
   9  -1  -2   12.74    0.57 
   9  -1  -2   11.96    0.61 
   9  -1  -2   13.55    0.90 
   9  -1  -2   13.32    0.59 
   9  -1  -2   12.17    0.68 
  -9  -1   2   11.50    0.90 
  -9  -1   2   12.23    0.71 
   9  -1  -2   12.83    0.50 
  -9  -1   2   12.18    0.78 
  -9  -1   2   12.74    0.74 
  -9  -1   2   13.92    0.79 
  -9  -1   2   11.48    0.75 
   9  -1  -2   12.69    0.68 
   9  -1  -2   12.88    0.62 
  -9  -1   2   12.75    0.54 
  -9  -1   2   12.91    0.59 
   9  -1  -2   13.44    0.77 
  -9  -1   2   14.21    0.97 
   9   1  -2   13.57    0.78 
  -9   1   2   12.02    0.87 
  -9   1   2   12.65    0.69 
   9   1  -2   12.98    0.82 
  -9   1   2   12.45    0.68 
  -9   1   2   12.22    0.62 
   9   1  -2   13.21    0.81 
   9   1  -2   13.21    0.77 
  -9   1   2   13.07    0.61 
   9   1  -2   12.84    0.79 
   9   1  -2   12.92    0.92 
   9   1  -2   12.97    0.77 
   9   1  -2   13.61    0.77 
  -9   1   2   12.10    0.55 
  -9   1   2   12.56    0.73 
   9   1  -2   13.32    0.64 
   7  -1  -2   25.83    0.97 
   7  -1  -2   28.02    1.07 
  -7  -1   2   24.96    1.14 
  -7  -1   2   27.25    1.14 
   7  -1  -2   25.89    1.11 
   7  -1  -2   25.28    1.20 
   7  -1  -2   25.23    1.05 
   7  -1  -2   27.35    1.14 
   7  -1  -2   25.89    0.99 
  -7  -1   2   27.50    1.30 
   7  -1  -2   25.62    0.94 
  -7  -1   2   25.94    1.13 
  -7  -1   2   26.70    1.16 
  -7  -1   2   26.34    1.12 
   7  -1  -2   27.08    0.93 
  -7  -1   2   25.84    1.10 
   7  -1  -2   25.35    0.96 
  -7  -1   2   27.20    1.13 
   7  -1  -2   26.05    0.97 
   7  -1  -2   26.65    0.94 
  -7   1   2   25.92    1.12 
   7   1  -2   26.71    1.16 
   7   1  -2   28.48    1.00 
   7   1  -2   25.60    1.13 
  -7   1   2   25.93    1.21 
  -7   1   2   24.94    0.97 
  -7   1   2   25.39    0.97 
   7   1  -2   26.22    1.13 
   7   1  -2   27.60    1.16 
  -7   1   2   24.90    0.96 
   7   1  -2   27.87    1.17 
   7   1  -2   27.87    1.16 
  -7   1   2   26.41    1.03 
  -7   1   2   24.42    1.05 
   7   1  -2   26.67    1.13 
   7   1  -2   27.11    1.28 
   5  -1  -2  367.47   12.23 
   5  -1  -2  368.56   12.16 
   5  -1  -2  374.88   12.34 
   5  -1  -2  373.85   12.31 
   5  -1  -2  375.37   12.14 
  -5  -1   2  377.43   12.29 
  -5  -1   2  380.17   12.31 
   5  -1  -2  381.02   12.13 
  -5  -1   2  376.84   12.32 
  -5  -1   2  364.96   12.30 
   5  -1  -2  379.76   12.21 
  -5  -1   2  385.05   12.29 
  -5  -1   2  379.64   12.31 
   5  -1  -2  368.49   12.12 
  -5  -1   2  377.83   12.31 
   5  -1  -2  375.00   12.13 
   5  -1  -2  373.77   12.13 
   5   1  -2  381.73   12.31 
   5   1  -2  387.63   12.32 
  -5   1   2  373.94   12.34 
   5   1  -2  381.35   12.30 
   5   1  -2  370.63   12.40 
   5   1  -2  384.20   12.16 
  -5   1   2  385.08   12.20 
   5   1  -2  377.60   12.31 
   5   1  -2  378.04   12.32 
  -5   1   2  380.58   12.14 
  -5   1   2  379.72   12.30 
  -5   1   2  370.59   12.14 
  -5   1   2  358.86   12.23 
   5   1  -2  382.12   12.32 
   5   1  -2  368.73   12.32 
   3  -1  -2   25.62    0.87 
  -3  -1   2   26.13    1.02 
  -3  -1   2   26.37    1.00 
   3  -1  -2   25.84    0.87 
  -3  -1   2   25.61    0.91 
  -3  -1   2   25.54    1.03 
  -3  -1   2   26.58    0.99 
   3  -1  -2   26.01    0.87 
   3  -1  -2   24.69    0.86 
  -3  -1   2   26.04    1.03 
   3  -1  -2   26.62    0.91 
   3  -1  -2   25.38    1.00 
  -3  -1   2   26.40    1.00 
   3  -1  -2   25.28    0.93 
  -3  -1   2   26.63    1.06 
   3   1  -2   25.59    1.01 
   3   1  -2   26.26    0.99 
   3   1  -2   26.63    0.93 
  -3   1   2   25.16    1.01 
  -3   1   2   25.94    0.87 
   3   1  -2   26.86    1.00 
  -3   1   2   24.83    0.87 
   3   1  -2   25.64    1.05 
   3   1  -2   26.53    1.02 
   3   1  -2   27.78    1.04 
  -3   1   2   25.17    0.93 
   3   1  -2   25.01    1.02 
   3   1  -2   25.02    1.00 
  -1  -1   2   49.39    1.76 
  -1  -1   2   53.67    1.77 
  -1  -1   2   52.69    1.73 
   1  -1  -2   51.41    1.69 
   1  -1  -2   50.47    1.72 
   1  -1  -2   49.84    1.71 
  -1  -1   2   50.66    1.73 
   1  -1  -2   51.55    1.73 
  -1  -1   2   52.37    1.77 
   1  -1  -2   50.58    1.72 
  -1  -1   2   51.69    1.76 
  -1  -1   2   51.99    1.71 
  -1   1   2   51.01    1.72 
   1   1  -2   50.62    1.72 
   1   1  -2   51.06    1.73 
  -1   1   2   49.81    1.71 
   1   1  -2   52.17    1.73 
   1   1  -2   50.50    1.76 
  -1   1   2   50.76    1.72 
   1   1  -2   51.60    1.76 
   1   1  -2   51.47    1.76 
  -1  -1  -2   22.02    0.84 
   1  -1   2   22.76    0.79 
  -1  -1  -2   22.94    0.84 
   1  -1   2   21.28    0.84 
   1  -1   2   21.75    0.79 
   1  -1   2   22.11    0.78 
  -1  -1  -2   21.97    0.84 
   1  -1   2   21.47    0.79 
   1  -1   2   20.80    0.76 
  -1  -1  -2   22.85    0.82 
  -1  -1  -2   22.12    0.84 
   1  -1   2   22.44    0.78 
  -1  -1  -2   21.21    0.84 
  -1   1  -2   22.48    0.74 
  -1   1  -2   21.76    0.79 
  -1   1  -2   20.64    0.77 
   1   1   2   22.31    0.84 
   1   1   2   21.26    0.81 
  -1   1  -2   22.12    0.86 
   1   1   2   20.97    0.84 
   1   1   2   21.65    0.84 
   1   1   2   22.33    0.84 
  -1   1  -2   22.22    0.81 
  -1   1  -2   22.17    0.79 
   3  -1   2  136.39    4.41 
  -3  -1  -2  131.82    4.51 
  -3  -1  -2  142.62    4.53 
  -3  -1  -2  136.02    4.53 
  -3  -1  -2  136.34    4.58 
   3  -1   2  135.11    4.43 
  -3  -1  -2  132.81    4.51 
  -3  -1  -2  138.00    4.51 
   3  -1   2  137.77    4.49 
   3  -1   2  134.37    4.42 
   3  -1   2  133.36    4.44 
   3  -1   2  137.49    4.51 
  -3  -1  -2  126.72    4.53 
   3  -1   2  133.07    4.46 
   3  -1   2  130.95    4.42 
  -3  -1  -2  135.54    4.51 
   3   1   2  135.70    4.51 
   3   1   2  134.09    4.53 
  -3   1  -2  133.35    4.42 
   3   1   2  137.44    4.56 
  -3   1  -2  136.80    4.41 
  -3   1  -2  135.63    4.51 
  -3   1  -2  134.62    4.45 
  -3   1  -2  131.53    4.40 
  -3   1  -2  136.06    4.52 
  -3   1  -2  135.38    4.43 
   3   1   2  133.83    4.50 
   3   1   2  135.01    4.53 
   3   1   2  137.31    4.54 
  -3   1  -2  136.80    4.44 
   3   1   2  136.54    4.53 
   5  -1   2   17.99    0.75 
  -5  -1  -2   17.08    0.85 
   5  -1   2   17.85    0.70 
  -5  -1  -2   17.11    0.93 
   5  -1   2   18.46    0.62 
   5  -1   2   16.09    0.82 
  -5  -1  -2   17.77    0.83 
  -5  -1  -2   18.13    0.81 
  -5  -1  -2   17.89    0.72 
   5  -1   2   17.09    0.68 
  -5  -1  -2   17.91    0.84 
  -5  -1  -2   18.00    0.79 
  -5  -1  -2   17.57    0.73 
   5  -1   2   16.86    0.71 
   5  -1   2   17.83    0.78 
   5  -1   2   18.32    0.69 
  -5  -1  -2   18.30    0.83 
   5  -1   2   17.90    0.76 
  -5  -1  -2   19.05    0.84 
  -5   1  -2   17.56    0.69 
   5   1   2   19.38    0.87 
   5   1   2   18.38    0.84 
  -5   1  -2   17.99    0.71 
  -5   1  -2   18.31    0.73 
   5   1   2   17.98    0.85 
   5   1   2   17.56    0.84 
   5   1   2   17.15    0.83 
  -5   1  -2   17.37    0.72 
   5   1   2   18.63    0.92 
   5   1   2   16.68    0.80 
  -5   1  -2   17.69    0.77 
  -5   1  -2   17.90    0.80 
  -5   1  -2   17.69    0.76 
  -5   1  -2   18.35    0.66 
   5   1   2   18.24    0.81 
  -5   1  -2   18.20    0.88 
  -5   1  -2   17.75    0.70 
   7  -1   2   50.70    1.79 
  -7  -1  -2   50.33    1.82 
  -7  -1  -2   51.14    2.10 
   7  -1   2   48.95    1.87 
   7  -1   2   49.98    1.80 
   7  -1   2   50.98    1.77 
  -7  -1  -2   51.77    1.88 
   7  -1   2   51.31    1.68 
  -7  -1  -2   48.84    1.92 
   7  -1   2   52.43    1.77 
  -7  -1  -2   50.05    1.87 
  -7  -1  -2   48.93    1.94 
  -7  -1  -2   52.75    1.78 
   7  -1   2   46.70    1.85 
  -7  -1  -2   50.64    1.96 
  -7  -1  -2   52.31    1.94 
   7  -1   2   48.56    1.97 
   7  -1   2   50.39    1.85 
   7  -1   2   55.04    2.08 
   7  -1   2   51.06    1.77 
  -7  -1  -2   50.32    1.91 
  -7   1  -2   50.63    1.81 
   7   1   2   48.35    1.90 
  -7   1  -2   50.72    1.78 
   7   1   2   49.37    2.04 
  -7   1  -2   50.68    1.79 
  -7   1  -2   47.81    1.84 
  -7   1  -2   52.24    1.73 
  -7   1  -2   49.88    1.82 
   7   1   2   50.63    1.92 
   7   1   2   51.11    1.96 
  -7   1  -2   51.12    1.88 
  -7   1  -2   49.94    1.89 
  -7   1  -2   50.28    2.03 
   7   1   2   53.18    1.95 
   7   1   2   49.50    1.93 
  -7   1  -2   48.31    1.76 
   7   1   2   51.59    1.95 
   9  -1   2   45.54    1.62 
  -9  -1  -2   44.36    1.73 
  -9  -1  -2   45.51    1.81 
  -9  -1  -2   45.00    1.78 
  -9  -1  -2   45.58    1.61 
   9  -1   2   43.58    1.67 
   9  -1   2   43.42    1.76 
   9  -1   2   42.90    1.67 
  -9  -1  -2   43.50    1.80 
  -9  -1  -2   45.73    1.71 
   9  -1   2   44.77    1.60 
   9  -1   2   45.54    1.73 
   9  -1   2   45.45    1.90 
  -9  -1  -2   46.45    1.85 
  -9  -1  -2   45.02    1.73 
   9  -1   2   44.87    1.74 
   9  -1   2   44.94    1.66 
  -9  -1  -2   44.42    2.03 
  -9   1  -2   45.59    1.79 
  -9   1  -2   44.09    1.56 
   9   1   2   44.32    1.82 
   9   1   2   45.25    1.98 
   9   1   2   43.65    1.83 
  -9   1  -2   43.63    1.72 
   9   1   2   46.40    1.85 
   9   1   2   43.62    1.78 
  -9   1  -2   45.05    1.64 
  -9   1  -2   43.90    1.69 
  -9   1  -2   43.55    1.63 
  -9   1  -2   45.23    1.63 
   9   1   2   47.01    1.85 
  -9   1  -2   43.65    1.95 
   9   1   2   42.64    1.77 
  -9   1  -2   45.13    1.76 
  -9   1  -2   43.47    1.70 
 -11  -1  -2  107.08    3.48 
 -11  -1  -2  106.55    3.71 
 -11  -1  -2  103.51    3.75 
  11  -1   2  102.89    3.86 
 -11  -1  -2  101.74    4.02 
  11  -1   2  102.05    3.59 
  11  -1   2   98.61    3.58 
 -11  -1  -2  104.17    3.62 
  11  -1   2  103.24    3.65 
 -11  -1  -2   99.57    3.61 
  11  -1   2  101.76    3.69 
  11  -1   2  104.49    3.52 
  11  -1   2  102.73    3.48 
  11  -1   2   99.52    3.57 
 -11  -1  -2   96.65    3.74 
 -11  -1  -2   99.87    3.60 
  11  -1   2  103.15    3.59 
  11   1   2  103.16    3.76 
 -11   1  -2   99.67    3.52 
  11   1   2  106.67    3.96 
  11   1   2  104.58    3.76 
 -11   1  -2  100.42    3.66 
 -11   1  -2  101.24    3.63 
  11   1   2  103.22    3.69 
  11   1   2  102.67    3.69 
 -11   1  -2   98.22    3.60 
  11   1   2   98.35    3.75 
 -11   1  -2  107.38    3.64 
 -11   1  -2  105.56    3.98 
 -11   1  -2  106.98    3.52 
 -11   1  -2  102.87    3.43 
  11   1   2  101.57    3.75 
  13  -1   2   34.33    1.51 
 -13  -1  -2   32.23    1.51 
  13  -1   2   37.25    1.59 
  13  -1   2   35.22    1.42 
 -13  -1  -2   36.41    1.72 
 -13  -1  -2   38.77    1.38 
 -13  -1  -2   36.16    1.99 
  13  -1   2   37.64    1.55 
 -13  -1  -2   34.38    1.58 
  13  -1   2   34.63    1.38 
  13  -1   2   36.40    1.66 
  13  -1   2   33.89    1.53 
  13  -1   2   33.94    1.52 
 -13  -1  -2   36.05    1.50 
 -13  -1  -2   36.51    1.55 
 -13  -1  -2   37.35    1.71 
  13  -1   2   35.84    1.81 
 -13   1  -2   34.65    1.56 
 -13   1  -2   35.60    1.55 
  13   1   2   37.55    1.73 
 -13   1  -2   36.11    1.45 
  13   1   2   37.26    1.62 
  13   1   2   34.39    1.67 
  13   1   2   36.68    1.72 
 -13   1  -2   37.53    1.33 
 -13   1  -2   36.53    1.59 
 -13   1  -2   35.64    1.56 
  13   1   2   35.77    1.90 
  13   1   2   36.67    1.72 
 -13   1  -2   39.17    1.97 
  13   1   2   35.84    1.63 
 -13   1  -2   37.05    1.43 
 -15  -1  -2    0.81    0.53 
  15  -1   2    0.95    0.48 
  15  -1   2    0.49    0.38 
  15  -1   2    0.97    0.41 
 -15  -1  -2    1.16    0.41 
 -15  -1  -2    1.50    0.50 
 -15  -1  -2    0.87    0.33 
 -15  -1  -2    0.99    0.41 
  15  -1   2    0.49    0.27 
 -15  -1  -2    0.95    0.28 
  15  -1   2    1.53    0.45 
 -15  -1  -2    0.39    0.57 
  15  -1   2    1.34    0.44 
  15  -1   2    0.89    0.37 
 -15   1  -2    0.47    0.42 
  15   1   2    0.98    0.42 
  15   1   2    0.57    0.50 
  15   1   2    1.51    0.55 
  15   1   2    1.27    0.55 
 -15   1  -2    0.98    0.34 
 -15   1  -2    1.07    0.27 
 -15   1  -2    0.71    0.31 
 -15   1  -2    1.16    0.45 
  15   1   2    0.84    0.49 
 -15   1  -2    1.11    0.40 
  15   1   2    0.82    0.46 
 -15   1  -2    0.55    0.60 
 -17  -1  -2    3.62    0.72 
 -17  -1  -2    2.32    0.54 
  17  -1   2    3.29    0.69 
  17  -1   2    1.17    0.59 
 -17  -1  -2    2.19    0.61 
  17  -1   2    2.11    0.51 
  17  -1   2    2.22    0.52 
 -17  -1  -2    3.14    0.45 
  17  -1   2    2.39    0.59 
 -17  -1  -2    3.59    0.98 
 -17  -1  -2    3.10    0.67 
  17  -1   2    4.65    0.77 
  17   1   2    2.78    0.71 
 -17   1  -2    4.21    1.17 
  17   1   2    2.51    0.64 
 -17   1  -2    2.29    0.34 
  17   1   2    2.28    0.69 
 -17   1  -2    2.95    0.62 
 -17   1  -2    2.00    0.44 
 -17   1  -2    2.87    0.58 
 -17   1  -2    2.04    0.55 
 -17   1  -2    2.76    0.53 
  17   1   2    1.94    0.64 
 -19  -1  -2    1.89    0.66 
 -19  -1  -2    0.83    0.36 
 -19  -1  -2    1.60    0.56 
 -19  -1  -2    0.77    0.80 
  19  -1   2    1.19    0.68 
 -19  -1  -2    1.68    0.60 
  19  -1   2    1.43    0.60 
 -19  -1  -2    1.22    0.67 
  19  -1   2    1.22    0.62 
 -19   1  -2    0.85    0.53 
 -19   1  -2    1.13    0.43 
 -19   1  -2    1.24    0.42 
  19   1   2    1.42    0.72 
 -19   1  -2    2.31    0.94 
 -19   1  -2    1.04    0.60 
  19   1   2    1.88    0.75 
  19   1   2    0.82    0.57 
 -19   1  -2    0.62    0.59 
 -21  -1  -2    1.84    0.69 
 -21  -1  -2    1.76    0.81 
  21  -1   2    0.50    0.66 
 -21  -1  -2    2.25    0.78 
 -21  -1  -2    1.03    0.57 
 -21  -1  -2    1.60    1.01 
  21  -1   2    3.00    0.88 
 -21   1  -2    1.82    0.75 
 -21   1  -2    1.32    0.68 
 -21   1  -2    1.42    0.63 
  21   1   2    3.45    0.91 
  21   1   2    1.10    0.83 
 -21   1  -2    1.81    0.50 
 -21   1  -2    0.54    1.03 
 -23  -1  -2   10.59    1.47 
  23  -1   2    8.75    1.28 
 -23  -1  -2    8.97    1.46 
  23  -1   2    7.17    1.46 
 -23  -1  -2   11.39    1.96 
 -23  -1  -2    9.92    1.21 
 -23   1  -2    8.66    1.38 
 -23   1  -2    9.11    1.24 
 -23   1  -2    8.57    1.74 
  23   1   2    8.76    1.67 
  23   1   2    9.74    1.55 
 -23   1  -2    9.01    0.93 
  25  -1   2    2.73    1.02 
 -25  -1  -2    4.73    1.16 
 -25  -1  -2    1.85    0.91 
 -25   1  -2    3.37    0.99 
  25   1   2    2.72    1.10 
  26  -2  -2   -0.31    0.90 
 -26  -2   2    0.01    0.89 
 -26  -2   2    0.00    0.84 
  26   2  -2    0.41    1.05 
 -26   2   2    1.06    1.44 
 -26   2   2   -0.24    0.82 
 -24  -2   2    0.82    0.75 
 -24  -2   2   -0.78    0.78 
 -24  -2   2    0.97    1.09 
  24  -2  -2   -0.71    0.67 
  24  -2  -2   -0.76    0.75 
 -24  -2   2    0.34    0.72 
  24   2  -2   -0.16    0.87 
 -24   2   2    0.39    0.39 
 -24   2   2    0.31    1.11 
  24   2  -2   -0.31    0.84 
 -24   2   2    0.27    0.71 
 -22  -2   2    0.83    0.65 
 -22  -2   2    0.69    0.95 
 -22  -2   2    1.85    0.77 
  22  -2  -2    0.66    0.65 
  22  -2  -2    0.53    0.76 
 -22  -2   2    1.37    0.75 
 -22   2   2    0.33    0.57 
 -22   2   2    0.61    0.49 
 -22   2   2    1.12    0.70 
  22   2  -2    1.34    0.85 
  22   2  -2    0.06    0.74 
 -22   2   2    1.00    0.40 
  22   2  -2    0.98    0.78 
 -22   2   2    0.06    0.89 
 -20  -2   2    0.15    0.54 
 -20  -2   2    0.12    0.66 
 -20  -2   2   -0.16    0.74 
  20  -2  -2   -0.16    0.64 
 -20  -2   2    0.70    0.57 
  20  -2  -2   -0.17    0.45 
  20  -2  -2   -0.06    0.42 
 -20  -2   2    0.23    0.57 
  20  -2  -2   -0.25    0.49 
 -20   2   2    0.24    0.38 
  20   2  -2    0.89    0.70 
 -20   2   2    0.29    0.56 
  20   2  -2    0.22    0.65 
 -20   2   2   -0.62    0.67 
 -20   2   2    0.36    0.50 
  20   2  -2    0.09    0.54 
 -20   2   2    0.39    0.33 
 -20   2   2    0.32    0.41 
  20   2  -2    0.20    0.71 
  18  -2  -2    0.39    0.44 
 -18  -2   2    0.42    0.33 
 -18  -2   2    0.48    0.53 
 -18  -2   2    1.03    0.53 
 -18  -2   2    0.12    0.50 
  18  -2  -2    0.37    0.23 
 -18  -2   2    0.84    0.23 
  18  -2  -2    0.11    0.41 
 -18  -2   2    0.78    0.43 
 -18  -2   2    0.47    0.57 
  18  -2  -2   -0.02    0.42 
  18  -2  -2    0.30    0.55 
 -18  -2   2    0.19    0.64 
  18  -2  -2    0.37    0.37 
  18   2  -2   -0.07    0.57 
 -18   2   2    1.18    0.36 
  18   2  -2   -0.17    0.67 
  18   2  -2    1.11    0.64 
 -18   2   2    1.16    0.47 
 -18   2   2    0.83    0.65 
 -18   2   2    0.26    0.48 
  18   2  -2    0.60    0.53 
 -18   2   2    0.54    0.35 
 -18   2   2    0.32    0.30 
  18   2  -2    0.37    0.63 
 -16  -2   2   22.37    1.35 
  16  -2  -2   21.14    1.09 
 -16  -2   2   20.27    1.19 
 -16  -2   2   18.32    1.63 
  16  -2  -2   17.67    1.39 
  16  -2  -2   19.62    1.13 
  16  -2  -2   21.59    1.11 
 -16  -2   2   23.41    1.40 
 -16  -2   2   21.65    0.86 
 -16  -2   2   18.27    0.99 
  16  -2  -2   20.85    1.28 
  16  -2  -2   21.12    1.09 
  16  -2  -2   20.93    0.86 
 -16  -2   2   24.86    1.25 
  16  -2  -2   21.62    0.87 
 -16  -2   2   21.77    1.32 
 -16  -2   2   21.57    0.85 
  16  -2  -2   21.52    1.07 
 -16   2   2   21.16    1.03 
  16   2  -2   19.31    1.32 
 -16   2   2   21.14    0.95 
 -16   2   2   21.78    1.21 
  16   2  -2   21.70    1.41 
  16   2  -2   21.54    1.42 
  16   2  -2   20.66    1.40 
 -16   2   2   21.21    0.99 
  16   2  -2   21.56    1.40 
 -16   2   2   21.50    1.50 
  16   2  -2   21.07    1.30 
 -16   2   2   20.14    1.12 
 -14  -2   2    3.66    0.44 
  14  -2  -2    3.11    0.47 
  14  -2  -2    3.28    0.66 
 -14  -2   2    4.30    0.33 
 -14  -2   2    4.06    0.73 
 -14  -2   2    3.50    0.89 
 -14  -2   2    3.22    0.66 
  14  -2  -2    3.41    0.26 
  14  -2  -2    3.56    0.51 
  14  -2  -2    4.06    0.47 
 -14  -2   2    4.26    0.72 
  14  -2  -2    3.41    0.31 
 -14  -2   2    3.48    0.59 
  14  -2  -2    3.07    0.77 
  14  -2  -2    3.34    0.54 
  14  -2  -2    2.76    0.47 
 -14  -2   2    5.02    0.64 
 -14   2   2    4.02    0.53 
  14   2  -2    3.91    0.71 
 -14   2   2    3.35    0.46 
  14   2  -2    4.84    0.77 
 -14   2   2    3.18    0.38 
 -14   2   2    4.09    0.85 
  14   2  -2    4.76    0.77 
  14   2  -2    3.05    0.66 
  14   2  -2    3.96    0.73 
  14   2  -2    3.06    0.67 
 -14   2   2    3.70    0.60 
 -14   2   2    3.27    0.44 
  14   2  -2    3.90    0.75 
 -12  -2   2   16.48    0.95 
 -12  -2   2   16.51    1.23 
  12  -2  -2   14.97    0.65 
 -12  -2   2   14.82    0.76 
 -12  -2   2   15.43    1.01 
  12  -2  -2   14.51    0.72 
 -12  -2   2   14.60    1.00 
  12  -2  -2   14.42    0.94 
 -12  -2   2   15.34    0.97 
 -12  -2   2   17.24    1.07 
  12  -2  -2   14.38    0.80 
  12  -2  -2   16.15    0.79 
  12  -2  -2   16.78    0.74 
  12  -2  -2   15.50    0.74 
  12  -2  -2   15.30    1.07 
 -12   2   2   15.48    0.76 
 -12   2   2   15.58    0.87 
  12   2  -2   16.86    1.08 
 -12   2   2   16.82    1.13 
  12   2  -2   16.47    1.07 
 -12   2   2   14.31    0.93 
  12   2  -2   15.98    1.02 
 -12   2   2   15.46    0.80 
 -12   2   2   15.63    0.71 
  12   2  -2   14.90    1.15 
  12   2  -2   14.62    1.00 
  12   2  -2   13.84    1.03 
  12   2  -2   15.33    0.77 
  12   2  -2   16.59    1.01 
 -12   2   2   13.88    0.66 
  12   2  -2   13.42    0.95 
 -10  -2   2   38.06    1.68 
  10  -2  -2   42.91    1.79 
  10  -2  -2   39.39    1.54 
  10  -2  -2   41.02    1.43 
 -10  -2   2   40.42    1.73 
  10  -2  -2   38.90    1.42 
  10  -2  -2   40.13    1.44 
 -10  -2   2   42.51    1.79 
  10  -2  -2   40.84    1.66 
  10  -2  -2   40.97    1.56 
 -10  -2   2   39.89    1.72 
 -10  -2   2   40.71    1.95 
  10  -2  -2   38.38    1.41 
 -10  -2   2   42.88    1.76 
 -10   2   2   38.53    1.40 
  10   2  -2   40.38    1.89 
 -10   2   2   40.37    1.42 
  10   2  -2   39.57    1.78 
  10   2  -2   41.19    1.72 
  10   2  -2   39.66    1.75 
  10   2  -2   39.85    1.77 
 -10   2   2   41.33    1.51 
  10   2  -2   41.27    1.76 
  10   2  -2   40.02    1.76 
  10   2  -2   38.21    1.73 
 -10   2   2   41.28    1.52 
 -10   2   2   39.10    1.79 
 -10   2   2   37.99    1.60 
 -10   2   2   39.97    1.71 
   8  -2  -2    2.30    0.30 
   8  -2  -2    2.72    0.47 
   8  -2  -2    1.73    0.31 
   8  -2  -2    2.59    0.39 
  -8  -2   2    2.53    0.46 
  -8  -2   2    2.89    0.44 
  -8  -2   2    2.99    0.51 
   8  -2  -2    2.78    0.27 
  -8  -2   2    2.69    0.48 
  -8  -2   2    2.29    0.42 
  -8  -2   2    2.39    0.47 
  -8  -2   2    2.94    0.58 
  -8  -2   2    2.16    0.44 
   8  -2  -2    2.74    0.34 
   8   2  -2    3.21    0.50 
   8   2  -2    2.30    0.48 
  -8   2   2    2.46    0.48 
   8   2  -2    3.00    0.52 
   8   2  -2    2.21    0.50 
  -8   2   2    2.71    0.36 
  -8   2   2    2.17    0.34 
  -8   2   2    2.56    0.28 
   8   2  -2    2.29    0.49 
   8   2  -2    3.65    0.49 
  -8   2   2    2.10    0.44 
   8   2  -2    2.04    0.47 
   8   2  -2    2.53    0.54 
  -6  -2   2    7.69    0.60 
  -6  -2   2    6.18    0.62 
  -6  -2   2    7.82    0.52 
  -6  -2   2    7.77    0.61 
   6  -2  -2    7.43    0.43 
   6  -2  -2    7.47    0.54 
   6  -2  -2    7.69    0.56 
  -6  -2   2    7.45    0.60 
   6  -2  -2    6.78    0.42 
   6  -2  -2    7.60    0.39 
  -6  -2   2    7.72    0.57 
  -6  -2   2    5.97    0.52 
  -6  -2   2    7.71    0.56 
   6   2  -2    8.17    0.57 
  -6   2   2    7.57    0.47 
   6   2  -2    7.46    0.59 
  -6   2   2    6.68    0.57 
   6   2  -2    8.48    0.66 
  -6   2   2    7.82    0.54 
   6   2  -2    7.69    0.56 
   6   2  -2    6.96    0.58 
  -6   2   2    7.49    0.37 
   6   2  -2    7.33    0.58 
   6   2  -2    6.75    0.61 
   6   2  -2    7.32    0.61 
   4  -2  -2    2.14    0.31 
   4  -2  -2    2.59    0.26 
  -4  -2   2    2.80    0.41 
  -4  -2   2    2.91    0.46 
   4  -2  -2    3.00    0.40 
  -4  -2   2    3.36    0.44 
   4  -2  -2    3.34    0.23 
  -4  -2   2    2.57    0.44 
   4  -2  -2    2.44    0.35 
   4  -2  -2    3.23    0.15 
  -4  -2   2    2.95    0.45 
  -4  -2   2    3.11    0.46 
  -4  -2   2    1.95    0.33 
   4  -2  -2    2.99    0.19 
   4  -2  -2    2.89    0.21 
  -4  -2   2    3.07    0.32 
  -4  -2   2    2.62    0.40 
  -4   2   2    2.79    0.29 
  -4   2   2    2.67    0.39 
   4   2  -2    2.49    0.45 
   4   2  -2    2.83    0.38 
   4   2  -2    3.25    0.47 
   4   2  -2    2.88    0.44 
   4   2  -2    2.05    0.45 
  -4   2   2    2.58    0.20 
  -4   2   2    2.18    0.19 
   4   2  -2    3.06    0.41 
   4   2  -2    2.26    0.37 
   4   2  -2    1.81    0.41 
  -2  -2   2   39.43    1.44 
   2  -2  -2   37.22    1.41 
  -2  -2   2   40.18    1.53 
  -2  -2   2   39.93    1.54 
  -2  -2   2   41.36    1.51 
  -2  -2   2   40.94    1.54 
   2  -2  -2   40.65    1.42 
   2  -2  -2   39.43    1.42 
   2  -2  -2   37.65    1.38 
  -2  -2   2   37.94    1.46 
  -2  -2   2   39.30    1.39 
  -2  -2   2   40.35    1.49 
  -2  -2   2   40.29    1.45 
   2  -2  -2   39.37    1.52 
  -2  -2   2   39.94    1.53 
  -2   2   2   40.65    1.54 
   2   2  -2   39.48    1.38 
   2   2  -2   40.19    1.53 
   2   2  -2   40.01    1.36 
   2   2  -2   40.40    1.44 
   2   2  -2   41.17    1.47 
   2   2  -2   39.63    1.47 
  -2   2   2   39.70    1.41 
   2   2  -2   40.54    1.52 
  -2   2   2   41.01    1.41 
  -2   2   2   38.81    1.41 
  -2   2   2   40.53    1.42 
   2   2  -2   40.95    1.53 
   2   2  -2   40.89    1.52 
   2   2  -2   41.30    1.49 
   0  -2   2   76.23    2.62 
   0  -2  -2   76.36    2.65 
   0  -2   2   75.28    2.61 
   0  -2   2   78.96    2.63 
   0  -2   2   75.55    2.52 
   0  -2   2   79.69    2.63 
   0  -2   2   75.93    2.62 
   0  -2  -2   75.24    2.64 
   0  -2   2   74.65    2.63 
   0  -2   2   75.55    2.55 
   0  -2  -2   76.47    2.62 
   0  -2  -2   74.78    2.64 
   0  -2  -2   76.61    2.59 
   0  -2  -2   77.37    2.59 
   0   2   2   78.36    2.65 
   0   2  -2   76.80    2.60 
   0   2   2   74.58    2.65 
   0   2   2   76.97    2.64 
   0   2  -2   76.75    2.64 
   0   2  -2   77.26    2.63 
   0   2  -2   77.15    2.63 
   0   2  -2   76.30    2.56 
   0   2  -2   76.42    2.61 
   0   2   2   75.63    2.58 
   0   2  -2   77.56    2.63 
   0   2   2   73.03    2.63 
   0   2  -2   76.28    2.54 
   0   2   2   75.98    2.58 
   0   2  -2   76.25    2.51 
  -2  -2  -2   35.00    1.30 
  -2  -2  -2   32.87    1.26 
  -2  -2  -2   35.03    1.35 
  -2  -2  -2   33.26    1.34 
   2  -2   2   33.44    1.32 
   2  -2   2   35.57    1.23 
  -2  -2  -2   34.70    1.35 
   2  -2   2   35.67    1.22 
  -2  -2  -2   32.39    1.29 
   2  -2   2   34.62    1.24 
  -2  -2  -2   35.81    1.38 
   2  -2   2   35.47    1.28 
  -2  -2  -2   34.59    1.36 
   2  -2   2   33.92    1.25 
   2  -2   2   33.61    1.36 
  -2  -2  -2   34.33    1.34 
  -2   2  -2   35.23    1.24 
  -2   2  -2   33.60    1.24 
  -2   2  -2   34.39    1.19 
   2   2   2   34.58    1.36 
  -2   2  -2   33.75    1.32 
   2   2   2   34.79    1.37 
   2   2   2   34.70    1.30 
   2   2   2   33.03    1.38 
   2   2   2   35.99    1.34 
  -2   2  -2   32.60    1.18 
  -2   2  -2   33.53    1.30 
  -2   2  -2   34.97    1.25 
  -4  -2  -2   68.06    2.48 
  -4  -2  -2   69.16    2.55 
   4  -2   2   67.38    2.29 
  -4  -2  -2   69.12    2.50 
  -4  -2  -2   68.77    2.49 
   4  -2   2   69.63    2.30 
   4  -2   2   62.30    2.36 
  -4  -2  -2   70.01    2.46 
   4  -2   2   67.29    2.36 
  -4  -2  -2   68.74    2.44 
  -4  -2  -2   68.55    2.46 
   4  -2   2   66.49    2.29 
   4  -2   2   64.91    2.30 
   4  -2   2   70.97    2.40 
  -4  -2  -2   70.99    2.54 
   4  -2   2   66.66    2.47 
   4  -2   2   68.01    2.31 
  -4  -2  -2   69.88    2.49 
  -4   2  -2   67.31    2.30 
   4   2   2   69.29    2.44 
   4   2   2   71.02    2.47 
  -4   2  -2   69.65    2.30 
   4   2   2   70.98    2.54 
   4   2   2   69.97    2.50 
  -4   2  -2   69.20    2.40 
   4   2   2   71.53    2.53 
   4   2   2   71.06    2.52 
  -4   2  -2   70.02    2.41 
   4   2   2   66.94    2.41 
  -4   2  -2   70.99    2.31 
   4   2   2   66.31    2.51 
   4   2   2   70.65    2.51 
  -6  -2  -2    2.23    0.49 
  -6  -2  -2    2.11    0.38 
  -6  -2  -2    1.40    0.33 
  -6  -2  -2    1.56    0.39 
  -6  -2  -2    2.10    0.42 
  -6  -2  -2    1.77    0.39 
   6  -2   2    1.88    0.27 
   6  -2   2    1.76    0.19 
   6  -2   2    1.73    0.21 
   6  -2   2    1.89    0.29 
  -6  -2  -2    1.43    0.32 
  -6  -2  -2    1.62    0.36 
  -6  -2  -2    1.46    0.29 
   6  -2   2    1.62    0.33 
   6  -2   2    2.06    0.34 
   6  -2   2    1.83    0.19 
   6  -2   2    1.29    0.23 
   6   2   2    1.97    0.46 
  -6   2  -2    2.05    0.41 
   6   2   2    1.77    0.45 
  -6   2  -2    1.93    0.21 
   6   2   2    1.85    0.39 
   6   2   2    2.08    0.41 
   6   2   2    1.27    0.31 
  -6   2  -2    1.52    0.31 
   6   2   2    1.60    0.37 
   6   2   2    1.78    0.33 
  -6   2  -2    1.74    0.27 
   6   2   2    1.14    0.33 
  -6   2  -2    2.00    0.21 
  -6   2  -2    1.21    0.30 
  -6   2  -2    1.74    0.21 
   8  -2   2   35.10    1.24 
  -8  -2  -2   32.64    1.41 
  -8  -2  -2   33.39    1.47 
   8  -2   2   34.95    1.23 
  -8  -2  -2   33.90    1.67 
  -8  -2  -2   35.10    1.51 
   8  -2   2   33.22    1.26 
   8  -2   2   32.91    1.47 
  -8  -2  -2   36.01    1.58 
  -8  -2  -2   37.04    1.54 
   8  -2   2   35.12    1.27 
   8  -2   2   35.23    1.30 
  -8  -2  -2   33.40    1.50 
   8  -2   2   35.07    1.41 
   8  -2   2   33.63    1.36 
   8  -2   2   35.64    1.44 
  -8  -2  -2   33.87    1.47 
   8   2   2   33.56    1.55 
  -8   2  -2   34.62    1.25 
   8   2   2   33.08    1.50 
   8   2   2   35.26    1.54 
  -8   2  -2   36.03    1.28 
   8   2   2   33.69    1.52 
  -8   2  -2   34.57    1.48 
  -8   2  -2   35.25    1.40 
  -8   2  -2   33.40    1.28 
   8   2   2   36.51    1.57 
   8   2   2   35.69    1.54 
   8   2   2   35.72    1.48 
  -8   2  -2   33.36    1.35 
  -8   2  -2   34.72    1.55 
   8   2   2   34.70    1.60 
  -8   2  -2   33.81    1.37 
 -10  -2  -2    0.42    0.30 
 -10  -2  -2    0.32    0.26 
  10  -2   2   -0.09    0.18 
  10  -2   2    0.35    0.28 
 -10  -2  -2    0.68    0.38 
 -10  -2  -2    0.56    0.27 
 -10  -2  -2    0.51    0.23 
 -10  -2  -2    0.10    0.25 
  10  -2   2    0.15    0.14 
  10  -2   2    0.20    0.22 
 -10  -2  -2    0.08    0.32 
  10  -2   2    0.52    0.29 
  10  -2   2    0.61    0.21 
  10  -2   2    0.03    0.17 
 -10  -2  -2    0.26    0.42 
 -10  -2  -2    0.40    0.32 
  10  -2   2    0.16    0.34 
 -10   2  -2    0.38    0.27 
  10   2   2    0.58    0.36 
  10   2   2    0.06    0.34 
  10   2   2    0.34    0.35 
 -10   2  -2    0.39    0.17 
  10   2   2    0.14    0.39 
  10   2   2   -0.03    0.35 
 -10   2  -2    0.35    0.29 
 -10   2  -2    0.17    0.29 
 -10   2  -2   -0.10    0.22 
  10   2   2    0.52    0.39 
 -10   2  -2   -0.06    0.36 
 -10   2  -2   -0.14    0.28 
  10   2   2    0.45    0.36 
  10   2   2    0.50    0.37 
 -10   2  -2    0.36    0.21 
  12  -2   2    9.02    0.70 
  12  -2   2    9.36    0.49 
 -12  -2  -2    9.73    0.90 
 -12  -2  -2    8.70    0.66 
  12  -2   2   10.09    0.59 
  12  -2   2    9.70    0.53 
  12  -2   2    8.99    0.72 
 -12  -2  -2   10.01    0.75 
 -12  -2  -2    8.73    0.55 
 -12  -2  -2    9.38    0.88 
  12  -2   2    7.93    0.59 
  12  -2   2    8.58    0.85 
 -12  -2  -2    8.86    0.67 
 -12  -2  -2    8.91    1.04 
 -12  -2  -2    8.41    0.79 
  12  -2   2    9.50    0.58 
  12   2   2    8.98    0.84 
 -12   2  -2   10.30    0.98 
 -12   2  -2    8.25    0.75 
  12   2   2    9.91    0.92 
  12   2   2    7.33    0.90 
  12   2   2    9.28    0.88 
  12   2   2    8.45    0.81 
 -12   2  -2   10.14    0.66 
  12   2   2    7.88    0.77 
 -12   2  -2    9.43    0.63 
 -12   2  -2    9.59    0.53 
 -12   2  -2    9.35    0.62 
 -12   2  -2    8.99    0.70 
  12   2   2    9.05    0.88 
  14  -2   2    3.33    0.57 
 -14  -2  -2    2.75    0.39 
  14  -2   2    2.33    0.33 
 -14  -2  -2    2.97    0.66 
  14  -2   2    3.07    0.50 
 -14  -2  -2    3.07    0.55 
 -14  -2  -2    1.66    0.54 
  14  -2   2    2.37    0.46 
  14  -2   2    2.38    0.47 
 -14  -2  -2    2.99    0.56 
  14  -2   2    2.52    0.62 
 -14  -2  -2    3.38    0.82 
 -14  -2  -2    2.41    0.60 
  14  -2   2    2.87    0.36 
  14  -2   2    1.64    0.56 
  14  -2   2    3.00    0.50 
 -14   2  -2    2.80    0.39 
 -14   2  -2    2.38    0.44 
  14   2   2    2.99    0.77 
  14   2   2    1.42    0.56 
 -14   2  -2    2.22    0.49 
  14   2   2    2.13    0.58 
  14   2   2    1.62    0.55 
 -14   2  -2    1.33    0.62 
  14   2   2    2.31    0.53 
  14   2   2    1.76    0.60 
 -14   2  -2    2.17    0.49 
 -14   2  -2    2.24    0.49 
  16  -2   2    0.19    0.42 
 -16  -2  -2    0.31    0.28 
  16  -2   2   -0.28    0.34 
  16  -2   2    0.16    0.48 
 -16  -2  -2    0.65    0.53 
  16  -2   2    0.42    0.39 
 -16  -2  -2    0.19    0.40 
 -16  -2  -2    0.60    0.55 
  16  -2   2    0.47    0.40 
  16  -2   2    0.32    0.27 
  16  -2   2    0.11    0.32 
 -16  -2  -2    1.28    0.75 
 -16  -2  -2    0.14    0.42 
 -16  -2  -2    0.60    0.39 
 -16   2  -2    0.52    0.39 
 -16   2  -2    0.56    0.28 
 -16   2  -2    0.07    0.38 
 -16   2  -2    0.28    0.38 
  16   2   2    0.55    0.47 
  16   2   2    0.29    0.55 
  16   2   2    0.04    0.47 
  16   2   2    0.74    0.61 
 -16   2  -2    0.66    0.47 
 -16   2  -2    0.37    0.63 
  16   2   2    0.84    0.58 
  18  -2   2    0.29    0.59 
 -18  -2  -2   -0.34    0.56 
  18  -2   2   -0.01    0.47 
  18  -2   2    0.23    0.32 
 -18  -2  -2    0.26    0.30 
 -18  -2  -2   -0.33    0.69 
  18  -2   2    0.06    0.47 
 -18  -2  -2    0.29    0.61 
 -18  -2  -2    0.43    0.49 
 -18  -2  -2    0.46    0.49 
 -18   2  -2    0.44    0.47 
 -18   2  -2    0.65    0.75 
  18   2   2    0.18    0.55 
 -18   2  -2    0.46    0.51 
 -18   2  -2    0.17    0.41 
  18   2   2    0.10    0.62 
 -18   2  -2    0.00    0.30 
 -18   2  -2    0.01    0.41 
  18   2   2    0.27    0.63 
 -20  -2  -2   10.55    1.62 
 -20  -2  -2    9.21    1.33 
 -20  -2  -2    9.53    1.23 
 -20  -2  -2    9.70    0.79 
  20  -2   2    8.45    1.13 
  20  -2   2    9.64    1.06 
 -20  -2  -2    8.65    1.37 
  20  -2   2   10.99    1.18 
 -20  -2  -2   13.00    1.10 
 -20   2  -2   10.09    0.77 
  20   2   2    8.65    1.22 
 -20   2  -2    9.20    1.60 
  20   2   2    8.30    1.38 
 -20   2  -2    9.91    0.89 
 -20   2  -2   10.21    1.03 
 -20   2  -2    8.64    1.01 
 -20   2  -2    9.89    1.04 
  22  -2   2   -0.10    0.59 
  22  -2   2    0.51    0.75 
  22  -2   2    0.61    0.72 
 -22  -2  -2   -0.22    0.73 
 -22  -2  -2    1.28    0.86 
 -22  -2  -2    0.08    0.63 
 -22  -2  -2    0.34    0.94 
 -22   2  -2    0.40    0.71 
 -22   2  -2    1.13    0.70 
 -22   2  -2   -0.02    0.36 
  22   2   2    0.68    0.88 
 -22   2  -2    0.53    0.92 
  22   2   2   -0.30    0.78 
 -24  -2  -2    2.05    0.83 
  24  -2   2    3.00    1.07 
 -24  -2  -2    2.32    0.96 
  24  -2   2    2.35    1.05 
 -24  -2  -2    1.80    1.04 
 -24   2  -2    2.12    0.86 
 -24   2  -2    2.54    1.40 
  24   2   2    1.87    1.20 
  24   2   2    2.77    1.12 
 -24   2  -2    2.66    0.68 
 -25  -3   2    2.17    1.16 
 -25  -3   2    2.42    0.90 
 -25  -3   2    3.45    1.05 
  25  -3  -2    2.53    0.89 
  25  -3  -2    2.99    1.13 
 -25   3   2    1.02    0.84 
 -25   3   2    1.53    1.36 
  25   3  -2    2.45    1.13 
  25   3  -2    1.70    1.15 
 -23  -3   2    1.00    0.82 
  23  -3  -2   -0.15    0.70 
 -23  -3   2    0.53    1.25 
 -23  -3   2    0.66    0.68 
  23  -3  -2    1.21    0.84 
 -23  -3   2    1.55    0.80 
 -23   3   2    1.06    1.07 
 -23   3   2    0.12    0.72 
 -23   3   2    0.44    0.31 
  23   3  -2    1.27    0.90 
  23   3  -2   -0.07    0.90 
  23   3  -2    0.73    0.88 
  21  -3  -2   10.41    1.25 
  21  -3  -2   11.11    0.99 
 -21  -3   2   12.20    1.37 
  21  -3  -2   12.91    1.09 
 -21  -3   2   11.51    1.54 
 -21  -3   2   12.60    1.21 
 -21  -3   2   10.79    1.60 
  21   3  -2   10.13    1.45 
  21   3  -2   11.09    1.37 
 -21   3   2   12.49    0.68 
  21   3  -2   12.23    1.40 
 -21   3   2   10.97    0.82 
 -21   3   2   13.34    1.55 
 -21   3   2   12.49    0.97 
 -21   3   2   12.31    1.23 
 -19  -3   2    3.88    0.92 
  19  -3  -2    3.67    0.92 
 -19  -3   2    4.61    0.95 
 -19  -3   2    5.52    1.13 
  19  -3  -2    5.73    0.75 
 -19  -3   2    6.12    0.87 
  19  -3  -2    4.88    0.73 
 -19  -3   2    5.19    0.48 
  19  -3  -2    4.84    0.75 
  19  -3  -2    5.08    0.70 
 -19  -3   2    5.54    1.30 
 -19  -3   2    4.55    0.44 
 -19  -3   2    5.23    1.06 
  19   3  -2    5.31    1.15 
 -19   3   2    4.52    1.18 
 -19   3   2    4.52    0.55 
 -19   3   2    4.98    0.69 
 -19   3   2    5.50    0.45 
 -19   3   2    6.61    0.89 
  19   3  -2    4.56    0.93 
  19   3  -2    5.40    1.06 
  19   3  -2    5.29    1.26 
 -17  -3   2   37.08    1.89 
 -17  -3   2   37.42    1.73 
 -17  -3   2   34.09    1.34 
  17  -3  -2   33.94    1.36 
  17  -3  -2   36.26    1.53 
 -17  -3   2   31.15    2.20 
 -17  -3   2   33.40    1.53 
  17  -3  -2   33.11    1.54 
  17  -3  -2   34.72    1.60 
 -17  -3   2   36.49    1.98 
  17  -3  -2   36.42    1.54 
  17  -3  -2   38.93    1.85 
 -17  -3   2   33.62    1.89 
 -17  -3   2   38.42    1.83 
  17   3  -2   34.66    1.91 
 -17   3   2   37.44    1.54 
 -17   3   2   35.60    1.52 
 -17   3   2   35.03    2.04 
 -17   3   2   33.48    1.38 
 -17   3   2   35.12    1.74 
  17   3  -2   35.42    1.96 
  17   3  -2   34.06    1.98 
  17   3  -2   40.21    2.08 
 -17   3   2   35.60    1.31 
  17   3  -2   35.31    1.92 
  17   3  -2   39.27    2.00 
  15  -3  -2  143.41    4.73 
  15  -3  -2  139.67    4.88 
  15  -3  -2  134.58    4.82 
 -15  -3   2  131.77    4.83 
  15  -3  -2  140.41    5.23 
 -15  -3   2  143.97    5.19 
  15  -3  -2  143.46    5.04 
 -15  -3   2  140.93    5.16 
 -15  -3   2  142.26    5.24 
 -15  -3   2  141.33    5.55 
  15  -3  -2  143.33    4.74 
  15  -3  -2  139.06    4.69 
 -15  -3   2  142.51    5.11 
 -15   3   2  140.25    4.78 
 -15   3   2  144.63    5.29 
  15   3  -2  133.26    5.17 
 -15   3   2  131.65    4.96 
  15   3  -2  134.70    5.17 
  15   3  -2  140.18    5.19 
 -15   3   2  131.86    4.64 
 -15   3   2  143.87    4.83 
  15   3  -2  141.71    5.24 
  15   3  -2  138.94    5.26 
 -15   3   2  142.18    4.60 
  15   3  -2  138.76    5.16 
  13  -3  -2   58.56    2.32 
 -13  -3   2   54.97    2.69 
 -13  -3   2   59.45    2.45 
  13  -3  -2   57.60    1.99 
 -13  -3   2   55.33    2.45 
  13  -3  -2   56.57    2.22 
 -13  -3   2   60.80    2.43 
  13  -3  -2   55.54    1.99 
  13  -3  -2   60.70    2.48 
 -13  -3   2   57.56    2.51 
  13  -3  -2   52.89    2.12 
  13  -3  -2   55.29    2.05 
 -13   3   2   57.73    2.17 
  13   3  -2   54.33    2.61 
 -13   3   2   56.15    2.38 
  13   3  -2   59.84    2.49 
  13   3  -2   60.50    2.52 
  13   3  -2   54.54    2.48 
 -13   3   2   57.30    2.08 
  13   3  -2   59.30    2.43 
 -13   3   2   57.09    2.27 
  13   3  -2   60.47    2.50 
 -13   3   2   55.24    2.46 
  13   3  -2   57.88    2.54 
  13   3  -2   53.79    2.43 
  11  -3  -2   28.72    1.41 
  11  -3  -2   26.91    1.14 
 -11  -3   2   25.67    1.46 
 -11  -3   2   28.67    1.46 
  11  -3  -2   27.05    1.13 
 -11  -3   2   28.67    1.45 
 -11  -3   2   26.96    1.63 
  11  -3  -2   28.50    1.30 
 -11  -3   2   27.28    1.43 
  11  -3  -2   28.17    1.27 
 -11  -3   2   29.44    1.44 
  11   3  -2   28.28    1.49 
 -11   3   2   28.17    1.43 
  11   3  -2   27.56    1.47 
 -11   3   2   27.18    1.41 
  11   3  -2   26.24    1.39 
  11   3  -2   30.75    1.48 
 -11   3   2   28.78    1.23 
  11   3  -2   31.10    1.52 
  11   3  -2   27.53    1.50 
  11   3  -2   27.75    1.48 
  11   3  -2   28.25    1.58 
 -11   3   2   28.51    1.29 
 -11   3   2   29.45    1.10 
   9  -3  -2   58.12    2.22 
   9  -3  -2   59.45    2.28 
   9  -3  -2   60.12    2.16 
  -9  -3   2   62.14    2.38 
  -9  -3   2   56.85    2.40 
  -9  -3   2   62.27    2.58 
   9  -3  -2   57.86    2.31 
   9  -3  -2   59.77    2.11 
  -9  -3   2   60.26    2.45 
  -9  -3   2   59.74    2.43 
  -9  -3   2   61.04    2.42 
  -9   3   2   57.73    2.31 
   9   3  -2   59.90    2.37 
  -9   3   2   59.30    2.24 
  -9   3   2   62.50    2.40 
   9   3  -2   58.52    2.35 
  -9   3   2   58.72    2.21 
   9   3  -2   62.16    2.53 
   9   3  -2   61.25    2.44 
   9   3  -2   60.62    2.44 
   9   3  -2   60.03    2.45 
   9   3  -2   59.24    2.47 
   9   3  -2   56.82    2.43 
  -7  -3   2  153.37    5.40 
   7  -3  -2  156.77    5.20 
   7  -3  -2  151.06    5.26 
  -7  -3   2  159.58    5.37 
  -7  -3   2  150.63    5.39 
  -7  -3   2  155.10    5.43 
  -7  -3   2  156.28    5.49 
   7  -3  -2  154.90    5.09 
  -7  -3   2  158.13    5.39 
  -7  -3   2  152.60    5.41 
   7  -3  -2  150.98    5.21 
  -7  -3   2  150.43    5.34 
   7   3  -2  153.52    5.40 
   7   3  -2  152.15    5.41 
   7   3  -2  155.13    5.34 
   7   3  -2  163.30    5.43 
   7   3  -2  150.09    5.43 
   7   3  -2  155.84    5.25 
   7   3  -2  151.51    5.43 
   7   3  -2  157.73    5.33 
  -7   3   2  151.98    5.38 
   7   3  -2  153.85    5.42 
  -7   3   2  154.27    5.21 
   5  -3  -2   36.79    1.25 
  -5  -3   2   37.65    1.56 
  -5  -3   2   35.08    1.54 
   5  -3  -2   36.28    1.40 
  -5  -3   2   36.24    1.44 
   5  -3  -2   34.71    1.19 
  -5  -3   2   33.95    1.38 
  -5  -3   2   36.66    1.54 
   5  -3  -2   34.73    1.35 
   5  -3  -2   35.73    1.21 
  -5  -3   2   35.76    1.50 
  -5  -3   2   34.61    1.45 
   5  -3  -2   35.82    1.26 
  -5  -3   2   36.27    1.54 
   5  -3  -2   34.46    1.34 
  -5  -3   2   34.63    1.52 
   5   3  -2   36.07    1.53 
   5   3  -2   36.32    1.44 
   5   3  -2   35.65    1.52 
  -5   3   2   34.12    1.51 
   5   3  -2   35.31    1.53 
   5   3  -2   34.18    1.43 
   5   3  -2   34.20    1.26 
   5   3  -2   35.77    1.52 
   5   3  -2   36.63    1.35 
   5   3  -2   36.44    1.53 
  -5   3   2   34.98    1.25 
   5   3  -2   32.84    1.53 
  -5   3   2   32.93    1.24 
  -3  -3   2  318.12   10.94 
  -3  -3   2  326.81   10.92 
   3  -3  -2  325.05   10.78 
  -3  -3   2  334.10   10.86 
  -3  -3   2  337.83   10.96 
   3  -3  -2  323.35   10.93 
   3  -3  -2  341.25   10.87 
  -3  -3   2  333.71   10.82 
  -3  -3   2  326.16   10.84 
  -3  -3   2  334.83   10.94 
  -3  -3   2  329.50   10.95 
  -3  -3   2  351.32   10.91 
   3  -3  -2  349.56   10.79 
   3  -3  -2  329.55   10.78 
   3  -3  -2  317.27   10.73 
  -3   3   2  340.85   10.73 
   3   3  -2  328.28   10.93 
   3   3  -2  320.72   10.93 
   3   3  -2  318.97   10.92 
   3   3  -2  335.48   10.88 
  -3   3   2  316.23   10.77 
   3   3  -2  329.26   10.73 
  -3   3   2  319.88   10.77 
   3   3  -2  332.06   10.85 
   3   3  -2  331.30   10.82 
   3   3  -2  320.35   10.75 
   3   3  -2  333.10   10.95 
  -3   3   2  337.59   10.74 
  -3   3   2  334.71   10.95 
  -1  -3   2  754.93   24.06 
   1  -3  -2  743.82   23.98 
   1  -3  -2  725.65   23.96 
   1  -3  -2  735.38   24.01 
  -1  -3   2  737.70   24.01 
  -1  -3   2  730.68   23.98 
  -1  -3   2  757.99   23.94 
   1  -3  -2  757.98   23.99 
  -1  -3   2  700.17   23.85 
  -1  -3   2  753.96   24.05 
   1  -3  -2  739.84   24.01 
   1  -3  -2  728.78   23.93 
  -1  -3   2  761.64   24.06 
  -1  -3   2  762.64   24.09 
  -1  -3   2  746.13   23.96 
  -1  -3   2  742.31   24.07 
   1  -3  -2  727.56   24.01 
  -1  -3   2  740.46   23.92 
  -1   3   2  741.50   24.00 
  -1   3   2  747.61   24.01 
   1   3  -2  739.70   23.97 
   1   3  -2  747.10   24.04 
  -1   3   2  749.22   24.08 
   1   3  -2  758.52   24.06 
   1   3  -2  738.39   23.93 
  -1   3   2  710.43   23.92 
   1   3  -2  740.61   24.04 
   1   3  -2  732.67   23.95 
   1   3  -2  731.48   23.90 
   1   3  -2  742.73   24.07 
   1   3  -2  747.80   24.04 
  -1   3   2  720.29   23.99 
   1  -3   2  127.15    4.31 
  -1  -3  -2  129.48    4.37 
   1  -3   2  127.76    4.33 
  -1  -3  -2  128.84    4.41 
  -1  -3  -2  124.93    4.39 
   1  -3   2  130.25    4.38 
   1  -3   2  125.29    4.17 
  -1  -3  -2  133.17    4.38 
  -1  -3  -2  125.13    4.31 
   1  -3   2  123.35    4.21 
   1  -3   2  127.19    4.34 
  -1  -3  -2  130.53    4.31 
   1  -3   2  130.40    4.34 
  -1  -3  -2  126.23    4.39 
   1  -3   2  127.68    4.32 
  -1  -3  -2  127.20    4.32 
   1   3   2  125.77    4.39 
   1   3   2  130.57    4.39 
  -1   3  -2  124.32    4.32 
  -1   3  -2  128.61    4.37 
  -1   3  -2  127.71    4.21 
  -1   3  -2  129.61    4.34 
  -1   3  -2  128.98    4.35 
   1   3   2  124.21    4.29 
  -1   3  -2  128.25    4.28 
   1   3   2  128.51    4.41 
  -1   3  -2  122.54    4.16 
   1   3   2  129.92    4.29 
   1   3   2  129.49    4.40 
   3  -3   2   10.76    0.53 
  -3  -3  -2    9.24    0.67 
  -3  -3  -2    9.92    0.60 
  -3  -3  -2   11.46    0.68 
  -3  -3  -2   11.23    0.69 
   3  -3   2    9.84    0.57 
  -3  -3  -2   10.83    0.73 
   3  -3   2   10.37    0.55 
   3  -3   2   11.58    0.51 
   3  -3   2   10.97    0.54 
  -3  -3  -2   11.70    0.70 
  -3  -3  -2   10.22    0.69 
   3  -3   2   10.64    0.67 
  -3  -3  -2   12.12    0.66 
  -3  -3  -2   11.68    0.60 
   3   3   2    9.77    0.67 
   3   3   2   12.10    0.73 
   3   3   2   12.05    0.73 
   3   3   2   10.80    0.61 
  -3   3  -2   11.03    0.53 
  -3   3  -2    9.13    0.65 
   3   3   2   11.56    0.66 
  -3   3  -2   10.97    0.57 
   3   3   2   10.13    0.71 
   3   3   2    9.84    0.67 
  -3   3  -2   10.53    0.45 
  -3   3  -2   11.27    0.53 
  -3   3  -2   11.50    0.66 
  -5  -3  -2   19.93    1.03 
   5  -3   2   19.61    0.79 
   5  -3   2   18.33    0.87 
  -5  -3  -2   19.99    1.06 
   5  -3   2   20.73    1.02 
   5  -3   2   18.74    0.88 
   5  -3   2   20.62    0.79 
  -5  -3  -2   20.29    1.02 
  -5  -3  -2   20.39    0.95 
   5  -3   2   19.55    0.80 
  -5  -3  -2   21.19    1.09 
  -5  -3  -2   19.40    0.96 
   5  -3   2   18.82    0.75 
   5  -3   2   20.08    0.77 
   5  -3   2   20.09    0.74 
  -5  -3  -2   19.30    1.01 
  -5  -3  -2   20.28    1.00 
  -5  -3  -2   19.32    1.01 
   5   3   2   20.56    1.07 
  -5   3  -2   19.80    0.86 
   5   3   2   19.68    1.05 
   5   3   2   18.20    0.94 
  -5   3  -2   19.27    0.97 
   5   3   2   18.99    1.03 
   5   3   2   19.94    0.95 
   5   3   2   19.18    1.00 
   5   3   2   18.75    1.01 
   5   3   2   19.87    1.07 
  -5   3  -2   19.81    0.94 
   5   3   2   21.72    0.94 
  -5   3  -2   20.34    0.81 
  -5   3  -2   19.45    0.77 
   7  -3   2  109.38    3.93 
   7  -3   2  109.24    3.77 
  -7  -3  -2  116.70    4.11 
  -7  -3  -2  117.00    4.20 
  -7  -3  -2  119.50    4.13 
   7  -3   2  114.85    3.79 
  -7  -3  -2  116.66    4.12 
   7  -3   2  110.43    3.86 
  -7  -3  -2  117.30    4.26 
   7  -3   2  114.06    4.07 
   7  -3   2  115.39    3.80 
   7  -3   2  121.01    4.02 
  -7  -3  -2  113.78    4.13 
   7  -3   2  114.06    3.79 
  -7  -3  -2  114.97    4.06 
   7  -3   2  113.20    3.92 
  -7  -3  -2  113.48    4.11 
   7   3   2  106.76    4.05 
   7   3   2  123.78    4.17 
   7   3   2  112.81    4.18 
   7   3   2  121.85    4.20 
   7   3   2  114.44    4.06 
  -7   3  -2  110.39    3.80 
   7   3   2  113.48    4.16 
   7   3   2  119.89    4.20 
  -7   3  -2  113.69    3.99 
   7   3   2  115.22    4.12 
  -7   3  -2  114.49    3.81 
  -7   3  -2  110.80    4.00 
   9  -3   2  152.51    5.13 
  -9  -3  -2  152.78    5.57 
  -9  -3  -2  154.72    5.45 
  -9  -3  -2  148.44    5.35 
   9  -3   2  152.87    5.11 
   9  -3   2  149.59    5.24 
  -9  -3  -2  149.63    5.34 
   9  -3   2  149.83    4.99 
   9  -3   2  148.46    4.98 
   9  -3   2  152.65    4.98 
   9  -3   2  152.25    5.28 
  -9  -3  -2  151.14    5.33 
  -9  -3  -2  154.30    5.37 
  -9   3  -2  154.57    4.98 
  -9   3  -2  151.22    5.20 
   9   3   2  151.41    5.42 
   9   3   2  147.11    5.46 
   9   3   2  153.04    5.43 
   9   3   2  146.51    5.44 
  -9   3  -2  155.14    5.34 
  -9   3  -2  154.23    5.01 
   9   3   2  152.94    5.34 
   9   3   2  153.25    5.37 
   9   3   2  160.09    5.41 
   9   3   2  152.00    5.30 
  -9   3  -2  145.01    5.01 
 -11  -3  -2  193.85    6.88 
 -11  -3  -2  206.30    7.12 
  11  -3   2  201.23    6.92 
 -11  -3  -2  208.18    7.03 
 -11  -3  -2  200.19    6.96 
  11  -3   2  203.06    6.56 
  11  -3   2  197.10    6.70 
 -11  -3  -2  207.59    7.01 
  11  -3   2  200.38    6.59 
  11  -3   2  200.44    6.62 
 -11  -3  -2  197.86    6.98 
  11  -3   2  201.79    6.89 
 -11  -3  -2  197.33    7.27 
  11  -3   2  199.75    6.78 
 -11   3  -2  200.41    6.60 
 -11   3  -2  206.81    7.06 
  11   3   2  209.05    7.11 
  11   3   2  197.66    6.95 
  11   3   2  201.99    7.04 
  11   3   2  198.74    7.16 
  11   3   2  199.72    7.01 
 -11   3  -2  197.74    6.64 
  11   3   2  196.49    7.08 
 -11   3  -2  201.59    6.81 
  11   3   2  206.48    7.14 
 -11   3  -2  203.04    6.63 
  11   3   2  193.79    7.01 
 -13  -3  -2   34.89    2.13 
 -13  -3  -2   40.67    1.59 
  13  -3   2   38.93    1.86 
  13  -3   2   39.23    1.46 
 -13  -3  -2   38.53    1.87 
 -13  -3  -2   41.42    1.95 
 -13  -3  -2   42.97    1.86 
  13  -3   2   39.75    1.53 
 -13  -3  -2   39.39    2.01 
 -13  -3  -2   42.65    1.72 
  13  -3   2   38.45    1.41 
  13  -3   2   40.32    1.57 
  13  -3   2   38.55    1.71 
  13  -3   2   44.12    1.81 
 -13   3  -2   41.29    2.03 
  13   3   2   43.21    1.96 
  13   3   2   39.21    1.99 
  13   3   2   38.30    1.91 
 -13   3  -2   40.75    1.76 
 -13   3  -2   39.54    1.56 
 -13   3  -2   40.98    1.49 
  13   3   2   40.43    1.92 
  13   3   2   44.89    2.10 
  13   3   2   39.80    1.98 
 -13   3  -2   41.48    1.56 
 -13   3  -2   40.36    1.70 
 -15  -3  -2   18.76    1.09 
  15  -3   2   17.32    0.96 
 -15  -3  -2   17.17    1.22 
  15  -3   2   20.30    0.92 
  15  -3   2   19.28    1.14 
 -15  -3  -2   18.92    1.38 
 -15  -3  -2   20.41    0.93 
  15  -3   2   17.94    1.11 
 -15  -3  -2   18.10    1.56 
 -15  -3  -2   19.00    1.40 
 -15  -3  -2   18.17    1.18 
  15  -3   2   15.62    1.25 
  15   3   2   14.97    1.23 
 -15   3  -2   17.47    0.95 
  15   3   2   17.20    1.35 
 -15   3  -2   18.29    1.46 
  15   3   2   20.68    1.36 
  15   3   2   17.14    1.41 
 -15   3  -2   17.92    0.94 
 -15   3  -2   19.95    0.84 
  15   3   2   17.18    1.38 
 -15   3  -2   17.39    1.04 
 -15   3  -2   21.13    1.20 
 -17  -3  -2    9.58    1.16 
  17  -3   2   11.19    0.85 
 -17  -3  -2    9.55    0.67 
  17  -3   2   12.77    1.03 
 -17  -3  -2   10.83    1.08 
 -17  -3  -2   11.71    0.97 
 -17  -3  -2   11.20    1.46 
  17  -3   2   10.17    1.00 
 -17  -3  -2   11.92    0.96 
 -17  -3  -2    8.58    1.17 
  17  -3   2    8.39    0.81 
  17  -3   2   10.46    0.68 
 -17   3  -2    9.94    0.92 
  17   3   2    8.99    1.29 
  17   3   2    8.97    1.13 
 -17   3  -2   10.96    0.64 
  17   3   2    9.20    1.15 
 -17   3  -2    9.15    0.76 
 -17   3  -2   10.02    1.30 
  17   3   2    8.88    1.05 
 -17   3  -2    9.88    0.76 
 -17   3  -2    8.99    0.92 
 -19  -3  -2    0.33    0.63 
 -19  -3  -2   -0.40    0.49 
 -19  -3  -2   -0.32    0.63 
  19  -3   2   -0.28    0.50 
  19  -3   2   -0.97    0.53 
  19  -3   2    0.34    0.48 
 -19  -3  -2   -0.08    0.32 
 -19  -3  -2   -0.04    0.80 
 -19   3  -2    0.38    0.56 
  19   3   2    0.50    0.73 
 -19   3  -2    0.22    0.28 
 -19   3  -2   -0.11    0.75 
 -19   3  -2    0.11    0.41 
 -19   3  -2    0.29    0.51 
 -19   3  -2   -0.03    0.40 
  19   3   2    0.16    0.78 
  21  -3   2   52.97    2.53 
  21  -3   2   54.11    2.59 
 -21  -3  -2   58.66    2.59 
 -21  -3  -2   52.01    3.27 
 -21  -3  -2   52.84    2.75 
  21  -3   2   52.80    2.49 
 -21  -3  -2   53.07    2.89 
 -21   3  -2   54.12    2.58 
 -21   3  -2   53.71    2.05 
 -21   3  -2   50.83    3.21 
 -21   3  -2   50.29    2.30 
  21   3   2   51.09    3.13 
  21   3   2   53.30    2.75 
 -23  -3  -2   13.41    1.67 
 -23  -3  -2   14.05    1.36 
  23  -3   2   12.68    1.57 
 -23  -3  -2   10.83    1.88 
  23  -3   2   13.30    1.49 
 -23   3  -2   14.60    2.07 
  23   3   2   14.04    1.89 
  23   3   2   13.47    1.58 
 -23   3  -2   13.59    0.87 
 -24  -4   2   -0.25    0.83 
  24  -4  -2    1.00    0.88 
 -24  -4   2    0.49    0.76 
  24  -4  -2    0.00    0.69 
 -24   4   2   -0.57    0.77 
 -24   4   2    0.07    1.01 
  24   4  -2    0.35    0.97 
  24   4  -2   -0.52    0.94 
 -22  -4   2    4.49    1.34 
  22  -4  -2    6.56    0.91 
 -22  -4   2    5.53    1.17 
  22  -4  -2    5.10    1.11 
 -22  -4   2    4.64    0.91 
 -22  -4   2    5.13    1.15 
 -22   4   2    5.17    1.06 
  22   4  -2    6.22    1.52 
  22   4  -2    6.47    1.66 
  22   4  -2    7.00    1.35 
 -22   4   2    3.93    1.17 
 -20  -4   2    2.74    0.74 
  20  -4  -2    2.09    0.52 
 -20  -4   2    2.35    0.83 
 -20  -4   2    2.70    0.86 
  20  -4  -2    2.14    0.72 
 -20  -4   2    2.45    1.01 
  20  -4  -2    2.85    0.72 
 -20   4   2    3.67    0.80 
 -20   4   2    2.20    1.05 
  20   4  -2    2.68    0.99 
  20   4  -2    4.67    0.99 
  20   4  -2    1.17    0.84 
 -20   4   2    2.90    0.66 
 -18  -4   2    5.91    0.54 
 -18  -4   2    5.56    1.02 
 -18  -4   2    4.88    1.07 
 -18  -4   2    5.85    1.33 
  18  -4  -2    5.18    0.59 
 -18  -4   2    6.30    0.98 
 -18  -4   2    6.20    0.82 
  18  -4  -2    5.92    0.62 
  18  -4  -2    5.39    0.94 
 -18  -4   2    3.36    0.83 
  18  -4  -2    5.39    0.51 
  18  -4  -2    6.45    0.76 
  18   4  -2    6.54    1.09 
  18   4  -2    4.63    1.20 
 -18   4   2    5.16    0.57 
 -18   4   2    7.17    0.87 
 -18   4   2    5.78    1.10 
  18   4  -2    4.71    1.09 
  18   4  -2    6.86    1.15 
  16  -4  -2   37.46    1.67 
  16  -4  -2   38.89    2.06 
  16  -4  -2   42.47    1.86 
 -16  -4   2   44.25    2.53 
 -16  -4   2   44.95    2.17 
  16  -4  -2   42.34    1.62 
 -16  -4   2   47.47    2.28 
  16  -4  -2   42.07    1.94 
 -16  -4   2   43.12    2.13 
 -16  -4   2   40.48    2.08 
  16   4  -2   42.53    2.19 
  16   4  -2   39.82    2.11 
 -16   4   2   40.02    1.58 
  16   4  -2   45.15    2.28 
 -16   4   2   40.79    1.92 
 -16   4   2   37.62    2.13 
  16   4  -2   35.78    2.08 
  16   4  -2   45.03    2.26 
  14  -4  -2    8.51    0.62 
  14  -4  -2    8.65    0.90 
 -14  -4   2    9.70    1.07 
  14  -4  -2   10.96    0.87 
 -14  -4   2    9.20    0.98 
  14  -4  -2    8.62    0.59 
 -14  -4   2    8.29    1.16 
 -14  -4   2   10.58    0.99 
 -14  -4   2    8.03    0.97 
  14  -4  -2    9.61    0.81 
  14   4  -2    8.82    1.04 
  14   4  -2    8.13    1.03 
  14   4  -2    7.82    0.95 
 -14   4   2    7.39    0.77 
  14   4  -2    9.00    1.02 
  14   4  -2    9.80    1.09 
 -14   4   2    8.25    0.95 
 -14   4   2    8.81    0.93 
  14   4  -2    7.43    1.11 
 -12  -4   2   26.08    1.49 
 -12  -4   2   20.85    1.52 
 -12  -4   2   23.45    1.39 
 -12  -4   2   25.36    1.40 
  12  -4  -2   21.66    1.04 
 -12  -4   2   23.59    1.41 
  12  -4  -2   23.71    1.18 
  12  -4  -2   23.39    1.27 
  12  -4  -2   23.59    1.24 
  12  -4  -2   24.03    1.00 
  12   4  -2   22.39    1.43 
  12   4  -2   23.07    1.44 
  12   4  -2   22.69    1.49 
  12   4  -2   20.99    1.45 
 -12   4   2   24.65    1.39 
  12   4  -2   24.21    1.44 
  12   4  -2   22.35    1.34 
  12   4  -2   21.24    1.46 
 -10  -4   2   19.85    1.22 
  10  -4  -2   20.22    0.99 
  10  -4  -2   19.68    0.95 
  10  -4  -2   20.10    1.07 
 -10  -4   2   21.26    1.30 
 -10  -4   2   17.85    1.29 
  10  -4  -2   18.84    1.08 
 -10  -4   2   21.03    1.20 
 -10  -4   2   18.33    1.22 
 -10  -4   2   18.19    1.19 
  10  -4  -2   20.11    0.84 
  10   4  -2   20.58    1.28 
  10   4  -2   21.55    1.19 
  10   4  -2   18.03    1.26 
  10   4  -2   19.96    1.29 
  10   4  -2   19.89    1.25 
  10   4  -2   19.38    1.26 
 -10   4   2   17.84    1.16 
  10   4  -2   18.10    1.14 
  10   4  -2   19.65    1.27 
  -8  -4   2    3.01    0.59 
  -8  -4   2    2.06    0.53 
   8  -4  -2    2.43    0.42 
  -8  -4   2    2.14    0.44 
  -8  -4   2    2.41    0.56 
  -8  -4   2    3.17    0.64 
   8  -4  -2    2.78    0.27 
  -8  -4   2    2.03    0.49 
  -8  -4   2    2.11    0.53 
  -8  -4   2    2.18    0.75 
   8  -4  -2    2.37    0.43 
   8   4  -2    2.39    0.61 
   8   4  -2    2.49    0.56 
   8   4  -2    2.71    0.54 
   8   4  -2    1.94    0.53 
  -8   4   2    1.90    0.47 
   8   4  -2    3.06    0.66 
   8   4  -2    2.33    0.55 
   8   4  -2    2.56    0.59 
   8   4  -2    3.69    0.56 
  -6  -4   2    3.62    0.58 
   6  -4  -2    3.53    0.39 
   6  -4  -2    3.37    0.39 
   6  -4  -2    4.18    0.36 
  -6  -4   2    4.51    0.58 
  -6  -4   2    4.38    0.66 
  -6  -4   2    4.75    0.50 
   6  -4  -2    4.21    0.33 
  -6  -4   2    4.47    0.56 
   6  -4  -2    4.04    0.48 
   6  -4  -2    4.09    0.38 
  -6  -4   2    3.41    0.58 
   6  -4  -2    4.20    0.27 
  -6  -4   2    5.38    0.67 
   6  -4  -2    3.47    0.24 
  -6  -4   2    3.94    0.62 
  -6  -4   2    4.03    0.61 
  -6   4   2    3.60    0.60 
   6   4  -2    4.70    0.57 
   6   4  -2    3.86    0.53 
  -6   4   2    4.34    0.36 
   6   4  -2    3.98    0.65 
   6   4  -2    3.42    0.66 
  -6   4   2    3.49    0.35 
   6   4  -2    3.99    0.39 
   6   4  -2    4.28    0.64 
   6   4  -2    4.40    0.66 
   6   4  -2    4.11    0.37 
   6   4  -2    4.52    0.62 
   6   4  -2    4.79    0.53 
   4  -4  -2  340.03   11.13 
  -4  -4   2  342.43   11.44 
  -4  -4   2  348.36   11.35 
  -4  -4   2  349.08   11.43 
  -4  -4   2  342.05   11.40 
   4  -4  -2  338.59   11.16 
   4  -4  -2  343.69   11.19 
   4  -4  -2  339.74   11.29 
  -4  -4   2  337.70   11.38 
   4  -4  -2  342.14   11.20 
  -4  -4   2  344.78   11.26 
  -4  -4   2  346.02   11.30 
  -4  -4   2  347.33   11.28 
   4  -4  -2  328.55   11.12 
  -4  -4   2  343.56   11.43 
   4  -4  -2  342.53   11.17 
   4   4  -2  341.57   11.31 
  -4   4   2  339.25   11.41 
   4   4  -2  343.10   11.40 
  -4   4   2  349.57   11.08 
   4   4  -2  348.31   11.41 
  -4   4   2  334.23   11.17 
   4   4  -2  348.12   11.43 
   4   4  -2  329.09   11.27 
   4   4  -2  336.86   11.16 
   4   4  -2  334.79   11.24 
  -4   4   2  332.44   11.18 
   4   4  -2  340.37   11.39 
  -2  -4   2  257.04    8.32 
  -2  -4   2  250.02    8.47 
  -2  -4   2  240.46    8.18 
  -2  -4   2  250.37    8.46 
   2  -4  -2  257.45    8.36 
   2  -4  -2  246.92    8.35 
  -2  -4   2  259.00    8.45 
   2  -4  -2  248.98    8.33 
  -2  -4   2  246.51    8.32 
  -2  -4   2  253.26    8.34 
   2  -4  -2  241.56    8.29 
  -2  -4   2  259.45    8.39 
   2  -4  -2  256.76    8.21 
  -2  -4   2  261.44    8.47 
  -2  -4   2  247.01    8.28 
   2  -4  -2  246.22    8.25 
   2  -4  -2  247.76    8.36 
   2  -4  -2  246.99    8.40 
  -2  -4   2  247.54    8.47 
   2   4  -2  252.85    8.32 
   2   4  -2  250.22    8.48 
   2   4  -2  259.63    8.44 
   2   4  -2  250.66    8.31 
  -2   4   2  246.96    8.46 
   2   4  -2  252.74    8.27 
  -2   4   2  241.39    8.33 
   2   4  -2  252.34    8.44 
  -2   4   2  256.76    8.33 
   2   4  -2  251.01    8.45 
  -2   4   2  256.09    8.32 
   2   4  -2  252.64    8.30 
  -2   4   2  245.84    8.34 
   2   4  -2  251.62    8.44 
   0  -4   2    8.30    0.44 
   0  -4  -2    8.79    0.65 
   0  -4  -2    8.28    0.51 
   0  -4   2    8.85    0.64 
   0  -4  -2    7.66    0.61 
   0  -4   2    9.29    0.62 
   0  -4  -2    9.46    0.66 
   0  -4   2    9.95    0.62 
   0  -4   2    9.20    0.68 
   0  -4   2   10.57    0.65 
   0  -4  -2    7.74    0.59 
   0  -4  -2    9.87    0.61 
   0  -4   2    9.25    0.53 
   0  -4   2    7.76    0.59 
   0  -4   2    8.54    0.63 
   0  -4  -2    9.00    0.56 
   0  -4  -2    9.69    0.54 
   0   4  -2    8.83    0.44 
   0   4  -2    7.83    0.63 
   0   4  -2    8.22    0.60 
   0   4  -2    8.56    0.51 
   0   4   2    8.69    0.51 
   0   4  -2    6.00    0.51 
   0   4   2    9.10    0.49 
   0   4  -2    7.92    0.64 
   0   4   2    8.93    0.63 
   0   4   2    8.23    0.67 
   0   4  -2    8.78    0.42 
   0   4   2    8.76    0.65 
   0   4  -2    8.60    0.63 
   0   4   2    8.89    0.64 
   0   4  -2    8.93    0.66 
   0   4   2    9.44    0.65 
   2  -4   2    0.22    0.16 
   2  -4   2    0.45    0.26 
   2  -4   2    0.35    0.24 
  -2  -4  -2    0.34    0.26 
  -2  -4  -2    0.09    0.26 
  -2  -4  -2    0.05    0.24 
   2  -4   2    0.14    0.22 
   2  -4   2    0.14    0.11 
  -2  -4  -2    0.27    0.26 
   2  -4   2   -0.06    0.18 
  -2  -4  -2   -0.24    0.19 
  -2  -4  -2   -0.15    0.26 
  -2  -4  -2    0.51    0.30 
   2  -4   2   -0.40    0.23 
  -2  -4  -2    0.22    0.26 
   2  -4   2    0.32    0.23 
  -2   4  -2   -0.21    0.28 
  -2   4  -2   -0.17    0.22 
   2   4   2    0.27    0.28 
  -2   4  -2   -0.03    0.17 
   2   4   2   -0.01    0.27 
   2   4   2    0.32    0.30 
  -2   4  -2   -0.30    0.24 
  -2   4  -2   -0.18    0.23 
   2   4   2    0.19    0.24 
   2   4   2    0.28    0.31 
   2   4   2    0.42    0.23 
  -2   4  -2   -0.02    0.21 
  -4  -4  -2   27.31    1.35 
   4  -4   2   28.53    1.20 
   4  -4   2   26.72    1.06 
  -4  -4  -2   26.22    1.30 
  -4  -4  -2   28.42    1.27 
  -4  -4  -2   27.91    1.17 
  -4  -4  -2   28.22    1.37 
  -4  -4  -2   26.22    1.29 
   4  -4   2   27.06    1.12 
   4  -4   2   27.97    1.13 
   4  -4   2   28.21    1.12 
  -4  -4  -2   26.93    1.31 
  -4  -4  -2   29.39    1.32 
  -4  -4  -2   26.10    1.32 
   4  -4   2   24.89    0.94 
   4   4   2   25.83    1.30 
  -4   4  -2   27.01    1.06 
  -4   4  -2   26.21    1.28 
   4   4   2   26.01    1.33 
   4   4   2   28.83    1.38 
  -4   4  -2   26.49    1.14 
   4   4   2   28.57    1.35 
   4   4   2   29.04    1.23 
   4   4   2   27.84    1.37 
  -4   4  -2   29.98    1.29 
   4   4   2   25.61    1.23 
  -4   4  -2   28.29    1.11 
  -4   4  -2   27.04    0.98 
   6  -4   2    7.59    0.45 
  -6  -4  -2    7.31    0.73 
  -6  -4  -2    7.48    0.69 
  -6  -4  -2    9.07    0.82 
  -6  -4  -2    7.71    0.62 
   6  -4   2    7.46    0.38 
  -6  -4  -2    6.39    0.75 
   6  -4   2    6.12    0.68 
  -6  -4  -2    8.04    0.71 
   6  -4   2    6.66    0.38 
   6  -4   2    6.91    0.44 
  -6  -4  -2    8.22    0.72 
   6  -4   2    6.87    0.55 
   6  -4   2    6.81    0.41 
  -6  -4  -2    7.95    0.72 
   6  -4   2    7.10    0.45 
   6   4   2    6.64    0.63 
   6   4   2    6.35    0.79 
  -6   4  -2    6.66    0.64 
   6   4   2    7.75    0.74 
  -6   4  -2    8.60    0.72 
  -6   4  -2    7.61    0.49 
  -6   4  -2    7.39    0.42 
   6   4   2    7.69    0.77 
   6   4   2    8.19    0.81 
   6   4   2    8.16    0.70 
  -6   4  -2    6.71    0.48 
   6   4   2    7.85    0.77 
   8  -4   2  298.10   10.21 
  -8  -4  -2  304.04   10.23 
  -8  -4  -2  302.31   10.25 
  -8  -4  -2  311.09   10.27 
   8  -4   2  296.76    9.85 
   8  -4   2  290.14    9.79 
   8  -4   2  296.33    9.90 
   8  -4   2  304.81    9.84 
  -8  -4  -2  298.62   10.39 
  -8  -4  -2  296.75   10.25 
   8  -4   2  295.96    9.96 
  -8  -4  -2  322.12   10.38 
   8  -4   2  300.94   10.02 
   8  -4   2  303.89    9.85 
   8   4   2  309.71   10.20 
   8   4   2  306.29   10.34 
   8   4   2  306.41   10.30 
  -8   4  -2  298.22    9.84 
  -8   4  -2  305.49    9.89 
   8   4   2  308.94   10.35 
   8   4   2  305.65   10.25 
   8   4   2  302.21   10.36 
  -8   4  -2  294.51   10.10 
   8   4   2  305.97   10.30 
  -8   4  -2  295.19   10.21 
  -8   4  -2  305.42   10.05 
  10  -4   2   43.69    1.89 
  10  -4   2   43.86    1.51 
 -10  -4  -2   39.72    1.90 
 -10  -4  -2   43.45    1.95 
 -10  -4  -2   42.86    2.04 
  10  -4   2   41.92    1.73 
 -10  -4  -2   43.56    2.14 
 -10  -4  -2   39.53    1.91 
  10  -4   2   42.57    1.63 
  10  -4   2   43.40    1.50 
  10  -4   2   41.29    1.66 
 -10  -4  -2   43.58    1.96 
  10   4   2   41.79    2.02 
  10   4   2   44.57    2.09 
 -10   4  -2   40.20    1.82 
  10   4   2   39.55    2.01 
 -10   4  -2   41.74    1.50 
  10   4   2   41.71    2.02 
  10   4   2   41.67    1.90 
  10   4   2   41.93    1.98 
  10   4   2   41.89    1.87 
 -10   4  -2   43.28    1.53 
 -10   4  -2   42.70    1.79 
  10   4   2   39.02    1.96 
  12  -4   2   51.95    2.18 
  12  -4   2   49.52    1.99 
  12  -4   2   49.90    1.95 
 -12  -4  -2   48.91    2.26 
 -12  -4  -2   50.87    2.54 
  12  -4   2   50.15    2.12 
 -12  -4  -2   53.57    2.29 
 -12  -4  -2   52.06    2.31 
 -12  -4  -2   51.14    2.40 
  12  -4   2   50.52    1.81 
  12  -4   2   50.05    1.80 
  12   4   2   51.15    2.45 
  12   4   2   49.78    2.26 
  12   4   2   52.32    2.42 
 -12   4  -2   54.38    2.13 
 -12   4  -2   50.70    1.80 
 -12   4  -2   53.22    2.27 
  12   4   2   51.40    2.33 
 -12   4  -2   48.89    1.82 
  12   4   2   52.86    2.37 
  14  -4   2   30.24    1.51 
  14  -4   2   28.34    1.36 
 -14  -4  -2   31.73    1.84 
 -14  -4  -2   27.51    1.62 
  14  -4   2   27.41    1.51 
  14  -4   2   28.23    1.17 
 -14  -4  -2   31.53    1.98 
 -14  -4  -2   28.24    1.56 
  14  -4   2   27.67    1.25 
 -14  -4  -2   31.84    1.73 
  14   4   2   30.46    1.69 
  14   4   2   27.00    1.73 
 -14   4  -2   31.28    1.13 
  14   4   2   31.11    1.88 
 -14   4  -2   27.84    1.17 
 -14   4  -2   28.39    1.10 
  14   4   2   28.23    1.66 
 -14   4  -2   27.24    1.46 
 -14   4  -2   29.20    1.69 
 -16  -4  -2   28.73    1.84 
 -16  -4  -2   27.26    2.03 
 -16  -4  -2   29.26    1.63 
 -16  -4  -2   25.53    1.68 
  16  -4   2   24.90    1.54 
 -16  -4  -2   27.66    1.44 
  16  -4   2   25.88    1.22 
  16  -4   2   29.62    1.55 
  16  -4   2   27.31    1.02 
  16  -4   2   27.91    1.43 
  16  -4   2   25.34    1.21 
 -16  -4  -2   28.32    1.27 
 -16  -4  -2   28.50    1.66 
 -16   4  -2   28.10    1.09 
  16   4   2   25.55    1.78 
 -16   4  -2   26.03    1.74 
 -16   4  -2   29.16    1.49 
 -16   4  -2   26.99    1.19 
  16   4   2   26.16    1.69 
 -16   4  -2   26.44    1.12 
  16   4   2   30.73    1.97 
  16   4   2   29.08    1.74 
 -18  -4  -2    5.85    1.20 
  18  -4   2    3.21    0.81 
  18  -4   2    3.46    0.71 
  18  -4   2    4.64    0.68 
 -18  -4  -2    2.46    0.74 
 -18  -4  -2    4.20    0.96 
 -18  -4  -2    2.69    0.65 
 -18  -4  -2    3.45    0.56 
 -18  -4  -2    3.32    1.02 
 -18   4  -2    3.91    0.44 
  18   4   2    5.58    1.08 
  18   4   2    4.04    1.02 
 -18   4  -2    3.42    0.97 
 -18   4  -2    3.67    0.58 
 -18   4  -2    3.78    0.84 
  20  -4   2    0.14    0.60 
  20  -4   2    0.23    0.59 
  20  -4   2    0.45    0.53 
 -20  -4  -2    0.06    0.57 
 -20  -4  -2    0.48    0.95 
 -20  -4  -2    0.77    0.89 
 -20  -4  -2    0.52    0.76 
 -20   4  -2    0.09    0.40 
 -20   4  -2    1.18    0.89 
 -20   4  -2    0.14    0.26 
 -20   4  -2   -0.53    0.59 
  20   4   2   -0.27    0.94 
  20   4   2   -0.20    0.73 
  22  -4   2   32.29    1.97 
  22  -4   2   30.77    1.87 
 -22  -4  -2   24.56    2.38 
 -22  -4  -2   27.95    2.20 
 -22  -4  -2   27.44    1.83 
  22  -4   2   27.63    1.74 
  22   4   2   28.72    2.11 
 -22   4  -2   29.74    1.24 
 -22   4  -2   28.48    2.52 
  22   4   2   31.16    2.73 
 -24  -4  -2    2.11    0.91 
 -24  -4  -2    1.76    1.08 
  24  -4   2    2.35    0.92 
  24   4   2    2.05    1.18 
 -24   4  -2    1.77    1.32 
  23  -5  -2    0.98    0.92 
  23  -5  -2    1.38    0.57 
 -23  -5   2    1.12    0.79 
  23   5  -2    1.00    1.32 
  23   5  -2    1.05    1.22 
  23   5  -2    0.01    0.90 
 -21  -5   2   -0.10    0.72 
 -21  -5   2    0.50    0.88 
 -21  -5   2    0.28    0.78 
  21  -5  -2    0.73    0.56 
  21  -5  -2    0.33    0.70 
 -21  -5   2    0.71    0.67 
  21   5  -2    0.47    0.93 
  21   5  -2    0.38    0.88 
  21   5  -2   -0.04    0.81 
 -19  -5   2    6.92    1.47 
  19  -5  -2    8.62    1.06 
  19  -5  -2   10.48    0.97 
 -19  -5   2    6.98    1.36 
 -19  -5   2    9.49    1.33 
  19   5  -2    9.79    1.32 
  19   5  -2   12.26    1.66 
  19   5  -2    5.80    1.36 
  17  -5  -2    0.12    0.55 
 -17  -5   2    1.35    0.78 
 -17  -5   2    0.91    0.68 
  17  -5  -2    1.30    0.60 
  17  -5  -2    0.31    0.33 
 -17  -5   2    0.41    0.67 
 -17  -5   2    0.86    0.45 
  17  -5  -2    0.36    0.46 
 -17  -5   2    1.32    0.69 
  17   5  -2    0.33    0.70 
  17   5  -2    1.46    0.82 
  17   5  -2    0.04    0.74 
  17   5  -2    0.98    0.68 
  15  -5  -2   -0.47    0.43 
 -15  -5   2    0.36    0.52 
 -15  -5   2    0.49    0.39 
  15  -5  -2    0.43    0.44 
  15  -5  -2    0.38    0.32 
 -15  -5   2    0.32    0.65 
  15  -5  -2    0.23    0.29 
 -15  -5   2   -0.02    0.58 
 -15  -5   2   -0.34    0.57 
 -15  -5   2   -0.29    0.54 
  15  -5  -2    0.18    0.47 
  15   5  -2    0.74    0.71 
  15   5  -2    0.14    0.57 
  15   5  -2    1.76    0.74 
  15   5  -2    0.19    0.58 
 -15   5   2    0.85    0.61 
  15   5  -2   -0.13    0.54 
  13  -5  -2   17.13    0.81 
 -13  -5   2   19.77    1.41 
  13  -5  -2   17.33    1.03 
  13  -5  -2   14.90    1.08 
 -13  -5   2   14.77    1.23 
 -13  -5   2   17.46    1.36 
 -13  -5   2   21.43    1.55 
  13  -5  -2   17.32    0.95 
 -13  -5   2   18.24    1.31 
  13  -5  -2   19.04    1.20 
 -13  -5   2   18.39    1.02 
  13   5  -2   17.00    1.25 
 -13   5   2   18.49    1.30 
  13   5  -2   18.57    1.40 
  13   5  -2   15.03    1.41 
  13   5  -2   17.55    1.36 
  13   5  -2   17.28    1.36 
  11  -5  -2    0.32    0.33 
  11  -5  -2    1.06    0.23 
  11  -5  -2    0.88    0.46 
  11  -5  -2    0.54    0.33 
  11  -5  -2    0.12    0.32 
 -11  -5   2    1.09    0.39 
 -11  -5   2    0.43    0.49 
 -11  -5   2    1.06    0.61 
 -11  -5   2    0.34    0.47 
 -11  -5   2    1.03    0.53 
 -11  -5   2    1.61    0.60 
 -11  -5   2    0.98    0.51 
  11   5  -2    0.94    0.50 
  11   5  -2    0.03    0.47 
  11   5  -2    1.33    0.59 
  11   5  -2    1.00    0.50 
 -11   5   2    1.60    0.53 
  11   5  -2    2.08    0.64 
  11   5  -2    0.17    0.47 
  -9  -5   2   16.23    1.17 
   9  -5  -2   14.56    0.69 
  -9  -5   2   14.15    1.07 
  -9  -5   2   14.09    1.12 
  -9  -5   2   14.60    1.11 
   9  -5  -2   14.98    0.67 
   9  -5  -2   13.34    0.80 
   9  -5  -2   13.52    0.87 
   9  -5  -2   14.57    0.64 
  -9  -5   2   13.79    0.87 
  -9  -5   2   15.93    1.05 
   9  -5  -2   14.87    0.68 
  -9  -5   2   15.94    1.15 
   9   5  -2   15.16    1.15 
   9   5  -2   13.88    1.00 
   9   5  -2   14.92    1.13 
  -9   5   2   13.64    0.60 
  -9   5   2   15.89    1.08 
   9   5  -2   15.00    1.12 
   9   5  -2   14.94    1.15 
   9   5  -2   15.94    1.02 
   9   5  -2   13.19    1.13 
  -9   5   2   13.81    0.62 
   7  -5  -2    4.96    0.31 
  -7  -5   2    4.87    0.73 
  -7  -5   2    4.95    0.66 
  -7  -5   2    4.54    0.69 
  -7  -5   2    4.71    0.76 
   7  -5  -2    4.34    0.28 
  -7  -5   2    5.72    0.77 
   7  -5  -2    4.56    0.42 
  -7  -5   2    4.87    0.73 
   7  -5  -2    4.39    0.44 
  -7  -5   2    4.73    0.72 
   7  -5  -2    5.50    0.48 
  -7  -5   2    4.98    0.58 
   7  -5  -2    5.57    0.46 
   7  -5  -2    4.77    0.57 
   7   5  -2    4.02    0.74 
   7   5  -2    6.49    0.80 
   7   5  -2    4.61    0.69 
  -7   5   2    4.65    0.73 
   7   5  -2    4.81    0.77 
  -7   5   2    5.49    0.42 
   7   5  -2    4.36    0.62 
   7   5  -2    4.77    0.45 
   7   5  -2    4.01    0.74 
  -7   5   2    4.50    0.43 
   7   5  -2    5.12    0.62 
   5  -5  -2    2.33    0.52 
  -5  -5   2    1.72    0.49 
  -5  -5   2    3.53    0.66 
  -5  -5   2    2.59    0.61 
  -5  -5   2    1.85    0.45 
  -5  -5   2    2.30    0.45 
   5  -5  -2    2.47    0.32 
  -5  -5   2    2.37    0.46 
  -5  -5   2    1.45    0.44 
   5  -5  -2    1.94    0.31 
  -5  -5   2    2.14    0.54 
   5  -5  -2    1.67    0.36 
   5  -5  -2    2.00    0.36 
   5  -5  -2    2.00    0.32 
   5  -5  -2    1.67    0.34 
   5  -5  -2    1.69    0.38 
  -5   5   2    1.75    0.22 
  -5   5   2    2.09    0.43 
   5   5  -2    2.04    0.51 
   5   5  -2    1.62    0.40 
   5   5  -2    3.58    0.67 
   5   5  -2    2.81    0.65 
   5   5  -2    2.70    0.61 
  -5   5   2    2.22    0.52 
   5   5  -2    2.17    0.54 
   5   5  -2    1.32    0.32 
   5   5  -2    2.27    0.46 
  -5   5   2    1.65    0.41 
  -3  -5   2   15.66    0.90 
  -3  -5   2   16.00    0.87 
   3  -5  -2   14.68    0.77 
  -3  -5   2   15.37    1.03 
  -3  -5   2   15.50    0.89 
  -3  -5   2   14.60    0.69 
   3  -5  -2   14.75    0.85 
   3  -5  -2   13.46    0.69 
  -3  -5   2   13.09    0.95 
  -3  -5   2   13.81    0.96 
   3  -5  -2   16.00    0.88 
   3  -5  -2   14.98    0.64 
  -3  -5   2   16.19    1.00 
  -3  -5   2   16.26    0.97 
   3  -5  -2   15.17    0.92 
  -3  -5   2   14.09    0.79 
   3  -5  -2   16.22    0.84 
   3  -5  -2   16.00    0.84 
   3   5  -2   15.31    0.95 
   3   5  -2   15.38    0.99 
  -3   5   2   14.33    0.98 
  -3   5   2   14.19    0.85 
  -3   5   2   13.42    0.83 
   3   5  -2   14.13    0.85 
   3   5  -2   15.45    0.79 
   3   5  -2   14.78    0.81 
   3   5  -2   16.17    1.05 
   3   5  -2   14.75    1.00 
   3   5  -2   13.54    0.81 
  -3   5   2   15.33    0.78 
  -1  -5   2   23.24    1.15 
   1  -5  -2   23.19    1.06 
  -1  -5   2   21.17    0.93 
  -1  -5   2   20.46    0.92 
  -1  -5   2   19.58    0.99 
   1  -5  -2   22.30    1.13 
   1  -5  -2   22.38    0.94 
   1  -5  -2   23.79    1.14 
   1  -5  -2   22.05    1.08 
   1  -5  -2   21.39    0.95 
  -1  -5   2   20.34    1.14 
  -1  -5   2   20.79    0.82 
  -1  -5   2   20.96    1.18 
  -1  -5   2   20.59    1.11 
  -1  -5   2   20.88    1.07 
  -1  -5   2   18.22    1.06 
   1  -5  -2   22.73    1.12 
  -1  -5   2   22.31    1.15 
   1  -5  -2   22.28    1.10 
   1  -5  -2   22.17    1.00 
  -1   5   2   21.14    0.94 
   1   5  -2   21.90    0.92 
   1   5  -2   20.15    1.12 
   1   5  -2   22.39    1.07 
  -1   5   2   21.07    1.15 
  -1   5   2   23.01    1.13 
  -1   5   2   20.26    1.09 
  -1   5   2   19.54    1.05 
   1   5  -2   23.12    1.12 
   1   5  -2   21.54    0.90 
   1   5  -2   20.40    1.17 
   1   5  -2   22.85    1.15 
   1   5  -2   21.67    0.99 
   1  -5   2   59.13    2.14 
   1  -5   2   64.41    2.39 
  -1  -5  -2   64.16    2.34 
   1  -5   2   58.20    2.35 
  -1  -5  -2   61.94    2.46 
   1  -5   2   64.64    2.37 
   1  -5   2   63.28    2.22 
  -1  -5  -2   60.69    2.38 
  -1  -5  -2   64.11    2.29 
  -1  -5  -2   63.40    2.43 
   1  -5   2   61.98    2.37 
   1  -5   2   60.12    2.39 
  -1  -5  -2   59.72    2.43 
   1  -5   2   62.23    2.41 
  -1  -5  -2   63.35    2.32 
  -1  -5  -2   62.87    2.47 
  -1   5  -2   58.31    2.38 
  -1   5  -2   61.39    2.34 
  -1   5  -2   62.97    2.30 
   1   5   2   64.68    2.47 
   1   5   2   63.20    2.43 
   1   5   2   61.02    2.23 
   1   5   2   62.27    2.45 
  -1   5  -2   59.44    2.12 
  -1   5  -2   56.27    2.33 
   1   5   2   61.46    2.27 
  -1   5  -2   60.26    2.40 
  -1   5  -2   62.92    2.44 
   1   5   2   61.33    2.44 
  -3  -5  -2   63.38    2.60 
  -3  -5  -2   66.22    2.56 
  -3  -5  -2   64.66    2.68 
   3  -5   2   66.66    2.49 
   3  -5   2   70.06    2.46 
   3  -5   2   66.55    2.55 
  -3  -5  -2   69.70    2.69 
  -3  -5  -2   65.26    2.66 
   3  -5   2   65.89    2.52 
  -3  -5  -2   67.69    2.60 
   3  -5   2   63.78    2.27 
  -3  -5  -2   68.58    2.45 
   3  -5   2   66.75    2.53 
   3  -5   2   70.89    2.52 
  -3  -5  -2   68.66    2.66 
   3  -5   2   68.71    2.33 
  -3   5  -2   65.15    2.60 
  -3   5  -2   65.49    2.43 
   3   5   2   67.95    2.71 
   3   5   2   64.45    2.66 
   3   5   2   71.31    2.72 
   3   5   2   66.32    2.51 
   3   5   2   65.47    2.56 
  -3   5  -2   69.77    2.64 
  -3   5  -2   69.12    2.50 
   3   5   2   72.16    2.53 
  -3   5  -2   66.82    2.53 
  -3   5  -2   65.65    2.36 
   5  -5   2    5.34    0.56 
  -5  -5  -2    5.82    0.55 
   5  -5   2    4.15    0.26 
   5  -5   2    4.40    0.48 
  -5  -5  -2    4.19    0.67 
  -5  -5  -2    5.01    0.67 
  -5  -5  -2    3.39    0.63 
   5  -5   2    4.84    0.47 
  -5  -5  -2    4.01    0.61 
  -5  -5  -2    3.92    0.70 
  -5  -5  -2    3.95    0.64 
   5  -5   2    4.71    0.46 
  -5  -5  -2    3.25    0.60 
   5  -5   2    4.97    0.39 
  -5   5  -2    4.74    0.52 
  -5   5  -2    4.70    0.28 
   5   5   2    5.06    0.60 
  -5   5  -2    5.68    0.46 
  -5   5  -2    5.27    0.66 
   5   5   2    5.57    0.59 
   5   5   2    3.83    0.74 
   5   5   2    4.31    0.73 
   5   5   2    4.62    0.74 
   5   5   2    4.16    0.71 
  -5   5  -2    5.09    0.66 
   7  -5   2    0.33    0.18 
  -7  -5  -2   -0.19    0.35 
   7  -5   2    0.59    0.31 
  -7  -5  -2    0.67    0.46 
   7  -5   2    0.04    0.39 
   7  -5   2    0.35    0.22 
   7  -5   2    0.04    0.22 
  -7  -5  -2    0.32    0.36 
   7  -5   2    0.09    0.13 
  -7  -5  -2    0.51    0.39 
  -7  -5  -2    0.67    0.45 
   7  -5   2   -0.09    0.14 
  -7  -5  -2    0.26    0.43 
   7  -5   2    0.21    0.20 
  -7  -5  -2    0.41    0.36 
  -7   5  -2    0.22    0.41 
   7   5   2    0.61    0.40 
   7   5   2    0.96    0.45 
   7   5   2    0.16    0.37 
   7   5   2    0.29    0.40 
  -7   5  -2    0.66    0.43 
  -7   5  -2    0.37    0.21 
   7   5   2    0.25    0.45 
   7   5   2    1.11    0.49 
  -7   5  -2    0.12    0.24 
  -9  -5  -2    0.14    0.41 
   9  -5   2   -0.09    0.22 
   9  -5   2    0.04    0.21 
  -9  -5  -2    0.35    0.44 
   9  -5   2    0.08    0.20 
   9  -5   2    0.11    0.39 
  -9  -5  -2   -0.06    0.36 
   9  -5   2    0.24    0.20 
  -9  -5  -2    0.08    0.38 
   9  -5   2    0.28    0.29 
  -9  -5  -2   -0.06    0.44 
  -9  -5  -2   -0.12    0.40 
   9   5   2   -0.16    0.41 
   9   5   2   -0.24    0.45 
   9   5   2    0.25    0.45 
  -9   5  -2    0.39    0.24 
  -9   5  -2    0.67    0.41 
   9   5   2    0.70    0.50 
   9   5   2    0.02    0.40 
  -9   5  -2    0.09    0.15 
  -9   5  -2    0.09    0.28 
  -9   5  -2   -0.08    0.42 
   9   5   2    0.30    0.48 
 -11  -5  -2    9.96    1.14 
  11  -5   2   10.13    0.64 
  11  -5   2    9.62    0.72 
  11  -5   2   11.39    0.73 
  11  -5   2    9.94    0.52 
  11  -5   2   10.94    0.57 
 -11  -5  -2   11.03    1.03 
 -11  -5  -2   10.29    1.01 
  11  -5   2   10.38    0.96 
 -11  -5  -2   10.25    1.12 
 -11  -5  -2   11.21    1.02 
 -11   5  -2   10.31    0.51 
 -11   5  -2    9.18    0.82 
  11   5   2    9.62    1.05 
 -11   5  -2    7.63    0.85 
  11   5   2    9.78    1.12 
  11   5   2    9.87    1.10 
 -11   5  -2    9.51    0.58 
  11   5   2    9.77    0.96 
  11   5   2   10.18    1.13 
  13  -5   2    1.86    0.40 
 -13  -5  -2    1.05    0.53 
  13  -5   2    0.86    0.41 
 -13  -5  -2    1.57    0.62 
 -13  -5  -2    1.22    0.61 
  13  -5   2    0.57    0.35 
  13  -5   2    1.29    0.30 
  13  -5   2    1.39    0.26 
 -13  -5  -2    0.89    0.59 
  13  -5   2    1.26    0.52 
 -13  -5  -2    1.19    0.67 
  13   5   2    2.54    0.69 
 -13   5  -2    1.42    0.35 
 -13   5  -2    1.42    0.31 
  13   5   2    1.33    0.62 
  13   5   2    0.14    0.57 
 -13   5  -2    0.03    0.46 
  13   5   2    1.10    0.66 
 -13   5  -2    0.38    0.53 
  15  -5   2    1.89    0.55 
 -15  -5  -2    4.11    1.06 
  15  -5   2    3.56    0.79 
 -15  -5  -2    2.26    0.87 
 -15  -5  -2    1.84    0.65 
  15  -5   2    2.81    0.39 
 -15  -5  -2    2.58    0.69 
  15  -5   2    1.86    0.49 
 -15  -5  -2    2.03    0.75 
  15  -5   2    3.03    0.40 
  15   5   2    2.99    0.92 
  15   5   2    3.15    0.80 
  15   5   2    3.11    0.90 
 -15   5  -2    3.63    0.92 
 -15   5  -2    3.00    0.69 
  15   5   2    4.13    1.02 
  17  -5   2   12.80    0.72 
 -17  -5  -2   14.31    1.35 
 -17  -5  -2   13.45    1.65 
 -17  -5  -2   13.45    1.39 
  17  -5   2   10.31    1.48 
 -17  -5  -2   12.22    1.49 
 -17  -5  -2   14.78    1.10 
 -17  -5  -2   15.54    0.98 
  17  -5   2   15.50    1.21 
  17  -5   2   12.60    1.01 
  17   5   2   12.66    1.64 
 -17   5  -2   12.92    1.15 
  17   5   2   13.35    1.33 
  17   5   2   13.58    1.42 
 -17   5  -2   10.54    1.33 
  19  -5   2    7.65    0.81 
  19  -5   2    7.20    1.03 
 -19  -5  -2    8.27    1.57 
 -19  -5  -2    7.03    0.75 
 -19  -5  -2    9.90    1.39 
  19  -5   2    6.52    1.09 
 -19  -5  -2    6.37    1.39 
 -19  -5  -2    6.86    1.00 
 -19   5  -2    5.64    1.02 
 -19   5  -2    7.01    1.40 
  19   5   2    7.36    1.58 
  19   5   2    9.67    1.34 
 -21  -5  -2    0.54    1.05 
  21  -5   2   -0.27    0.65 
 -21  -5  -2   -0.15    0.65 
  21  -5   2    0.22    0.52 
 -21  -5  -2   -0.24    0.86 
  21   5   2    0.19    1.02 
 -21   5  -2    0.02    0.87 
  21   5   2    0.33    0.93 
  23  -5   2    0.19    0.73 
 -23  -5  -2   -0.35    0.79 
  23   5   2    0.62    1.04 
  23   5   2    2.57    1.32 
 -22  -6   2    3.06    0.90 
  22   6  -2    3.10    1.11 
  22   6  -2    3.40    1.20 
  22   6  -2    4.58    1.34 
 -20  -6   2   14.76    2.25 
 -20  -6   2   20.74    1.76 
  20  -6  -2   15.58    1.56 
  20  -6  -2   21.42    1.48 
  20   6  -2   21.40    2.17 
  20   6  -2   19.04    1.84 
  20   6  -2   18.64    1.71 
  18  -6  -2   28.92    1.64 
 -18  -6   2   29.28    2.18 
 -18  -6   2   23.08    1.80 
 -18  -6   2   27.30    1.96 
  18  -6  -2   24.34    1.49 
 -18  -6   2   26.78    1.96 
  18   6  -2   22.10    1.96 
  18   6  -2   26.11    1.83 
  18   6  -2   22.35    2.06 
 -16  -6   2   20.81    1.64 
  16  -6  -2   15.25    1.11 
 -16  -6   2   15.65    1.66 
 -16  -6   2   16.70    1.57 
 -16  -6   2   16.95    1.44 
  16  -6  -2   16.31    1.27 
 -16  -6   2   15.27    1.09 
  16   6  -2   15.05    1.65 
  16   6  -2   15.59    1.67 
  16   6  -2   18.37    1.47 
  16   6  -2   16.79    1.55 
 -16   6   2   16.20    1.40 
 -14  -6   2   62.21    2.52 
 -14  -6   2   63.81    3.12 
  14  -6  -2   60.00    2.63 
 -14  -6   2   60.44    2.79 
 -14  -6   2   64.24    2.91 
 -14  -6   2   64.52    2.97 
  14  -6  -2   59.37    2.43 
  14  -6  -2   54.82    2.47 
 -14  -6   2   56.54    2.81 
  14  -6  -2   61.48    2.72 
 -14   6   2   62.37    2.83 
  14   6  -2   58.94    2.96 
  14   6  -2   62.24    2.91 
  14   6  -2   57.72    2.88 
  14   6  -2   64.81    2.79 
  14   6  -2   62.81    2.95 
  12  -6  -2   48.20    2.01 
 -12  -6   2   51.16    2.49 
 -12  -6   2   48.78    2.11 
  12  -6  -2   46.80    2.03 
  12  -6  -2   51.04    2.33 
  12  -6  -2   46.77    1.74 
 -12  -6   2   45.43    2.36 
 -12  -6   2   52.59    2.37 
 -12  -6   2   47.94    2.51 
  12  -6  -2   49.51    1.99 
 -12  -6   2   51.75    2.48 
  12   6  -2   47.07    2.43 
  12   6  -2   50.03    2.47 
 -12   6   2   44.87    2.33 
  12   6  -2   48.83    2.46 
  12   6  -2   55.80    2.56 
  12   6  -2   51.50    2.31 
 -10  -6   2   13.76    1.22 
  10  -6  -2   15.04    0.84 
 -10  -6   2   14.25    1.23 
  10  -6  -2   16.40    0.80 
  10  -6  -2   14.86    0.76 
  10  -6  -2   14.37    0.96 
  10  -6  -2   16.51    0.82 
 -10  -6   2   15.13    1.28 
 -10  -6   2   14.69    1.28 
 -10  -6   2   14.19    0.99 
  10  -6  -2   16.19    0.69 
 -10  -6   2   15.44    1.18 
 -10  -6   2   15.25    1.29 
  10   6  -2   15.08    1.28 
  10   6  -2   15.47    1.30 
  10   6  -2   15.01    1.10 
  10   6  -2   15.62    0.82 
  10   6  -2   15.64    1.34 
 -10   6   2   15.59    0.70 
  10   6  -2   16.51    1.39 
  10   6  -2   17.10    1.23 
 -10   6   2   16.28    0.67 
 -10   6   2   16.34    1.22 
   8  -6  -2   21.30    0.79 
  -8  -6   2   23.91    1.44 
  -8  -6   2   21.88    1.29 
   8  -6  -2   20.01    0.97 
   8  -6  -2   22.14    1.02 
  -8  -6   2   19.45    1.16 
  -8  -6   2   19.26    1.33 
   8  -6  -2   21.03    1.16 
   8  -6  -2   20.65    1.00 
   8  -6  -2   19.97    0.78 
   8  -6  -2   19.95    0.90 
  -8  -6   2   21.45    1.40 
  -8  -6   2   20.94    1.36 
  -8  -6   2   20.69    1.34 
   8  -6  -2   20.93    0.83 
   8   6  -2   20.19    1.38 
   8   6  -2   21.99    1.23 
   8   6  -2   21.79    1.44 
  -8   6   2   20.65    1.35 
   8   6  -2   20.62    1.40 
   8   6  -2   18.97    1.26 
  -8   6   2   18.76    0.94 
   8   6  -2   21.07    1.00 
   8   6  -2   20.67    1.24 
   8   6  -2   20.06    1.39 
  -6  -6   2   89.42    3.56 
   6  -6  -2   88.20    3.21 
   6  -6  -2   91.87    3.24 
  -6  -6   2   90.76    3.47 
  -6  -6   2   88.65    3.56 
  -6  -6   2   89.09    3.38 
  -6  -6   2   87.66    3.58 
   6  -6  -2   89.53    3.37 
  -6  -6   2   92.02    3.57 
   6  -6  -2   92.18    3.13 
   6  -6  -2   86.60    3.21 
   6  -6  -2   86.33    3.08 
   6  -6  -2   87.38    3.10 
  -6  -6   2   87.94    3.35 
  -6  -6   2   92.64    3.53 
  -6   6   2   84.99    3.17 
   6   6  -2   85.21    3.52 
   6   6  -2   85.01    3.53 
   6   6  -2   91.50    3.30 
   6   6  -2   88.13    3.49 
   6   6  -2   92.77    3.57 
  -6   6   2   87.47    3.19 
   6   6  -2   87.15    3.19 
   6   6  -2   93.21    3.38 
   6   6  -2   92.05    3.40 
  -6   6   2   87.06    3.50 
  -4  -6   2  109.28    4.01 
   4  -6  -2  100.83    3.68 
   4  -6  -2  103.94    3.64 
  -4  -6   2  103.17    3.87 
  -4  -6   2  107.47    4.03 
   4  -6  -2  108.48    3.67 
  -4  -6   2  111.24    3.88 
   4  -6  -2  103.10    3.52 
  -4  -6   2  107.92    4.03 
  -4  -6   2  103.57    3.85 
  -4  -6   2  105.62    4.04 
   4  -6  -2  105.30    3.90 
  -4  -6   2  101.50    4.01 
   4  -6  -2  108.56    3.77 
   4  -6  -2  101.01    3.77 
   4  -6  -2  106.34    3.82 
   4  -6  -2  105.78    3.82 
  -4   6   2  109.45    3.65 
   4   6  -2  111.47    3.78 
   4   6  -2  103.76    3.98 
   4   6  -2  106.76    4.05 
   4   6  -2  105.59    3.82 
  -4   6   2   99.34    3.76 
  -4   6   2  107.75    4.02 
  -4   6   2  105.50    3.79 
   4   6  -2  105.88    3.99 
   4   6  -2  105.07    3.76 
   4   6  -2  104.12    3.78 
   4   6  -2  104.07    3.97 
   2  -6  -2   50.48    2.07 
   2  -6  -2   48.81    2.07 
  -2  -6   2   52.01    2.08 
  -2  -6   2   48.24    2.17 
   2  -6  -2   50.53    2.06 
   2  -6  -2   48.73    1.98 
  -2  -6   2   48.01    1.78 
  -2  -6   2   51.87    2.16 
   2  -6  -2   49.82    1.93 
   2  -6  -2   46.90    1.87 
   2  -6  -2   50.22    2.05 
  -2  -6   2   48.69    2.13 
  -2  -6   2   51.73    1.95 
  -2  -6   2   51.73    2.01 
   2  -6  -2   49.49    1.82 
  -2  -6   2   50.14    1.92 
  -2  -6   2   52.36    2.16 
   2  -6  -2   52.03    2.13 
  -2  -6   2   46.32    2.20 
   2   6  -2   46.56    1.94 
  -2   6   2   47.39    1.98 
   2   6  -2   49.97    2.20 
   2   6  -2   49.89    1.87 
  -2   6   2   47.76    2.04 
   2   6  -2   51.05    1.91 
  -2   6   2   52.08    2.19 
   2   6  -2   49.53    2.01 
   2   6  -2   51.42    2.17 
  -2   6   2   47.29    2.05 
   2   6  -2   53.55    2.17 
   2   6  -2   50.83    2.12 
   0  -6  -2  104.91    3.62 
   0  -6  -2  101.12    3.77 
   0  -6   2  107.49    3.80 
   0  -6   2  107.08    3.80 
   0  -6  -2  102.83    3.83 
   0  -6  -2  105.54    3.84 
   0  -6  -2  101.22    3.83 
   0  -6   2  100.30    3.85 
   0  -6  -2  105.41    3.69 
   0  -6   2  106.72    3.64 
   0  -6  -2  105.73    3.81 
   0  -6   2   97.95    3.54 
   0  -6   2  101.65    3.79 
   0  -6   2  104.27    3.81 
   0  -6  -2   97.32    3.80 
   0  -6   2  105.45    3.85 
   0  -6  -2  102.48    3.74 
   0   6   2  101.65    3.60 
   0   6  -2  100.83    3.74 
   0   6  -2  102.13    3.83 
   0   6   2   89.20    3.74 
   0   6   2  102.87    3.81 
   0   6  -2  102.52    3.51 
   0   6   2  102.32    3.82 
   0   6  -2  102.79    3.76 
   0   6  -2  106.25    3.42 
   0   6   2  103.06    3.83 
   0   6  -2  104.56    3.80 
   2  -6   2   90.53    3.47 
   2  -6   2   89.07    3.17 
   2  -6   2   94.58    3.48 
  -2  -6  -2   89.98    3.28 
  -2  -6  -2   97.83    3.46 
   2  -6   2   96.85    3.52 
  -2  -6  -2   94.42    3.43 
  -2  -6  -2   94.39    3.59 
   2  -6   2   90.35    3.42 
  -2  -6  -2   93.94    3.50 
   2  -6   2   87.82    3.41 
  -2  -6  -2   97.94    3.58 
  -2  -6  -2   93.24    3.59 
   2  -6   2   94.55    3.25 
  -2  -6  -2   93.40    3.60 
   2  -6   2   95.73    3.41 
  -2   6  -2   92.63    3.31 
  -2   6  -2   89.10    3.42 
   2   6   2   92.87    3.57 
   2   6   2   97.08    3.61 
  -2   6  -2   91.23    3.50 
   2   6   2   93.15    3.36 
   2   6   2   93.91    3.58 
  -2   6  -2   90.66    3.42 
   2   6   2   99.04    3.53 
   2   6   2   94.69    3.33 
  -2   6  -2   93.57    3.49 
   4  -6   2    7.35    0.63 
  -4  -6  -2    7.92    0.88 
  -4  -6  -2    8.09    0.78 
   4  -6   2    7.00    0.56 
  -4  -6  -2    6.19    0.76 
   4  -6   2    7.61    0.73 
   4  -6   2    7.34    0.71 
  -4  -6  -2    7.87    0.80 
  -4  -6  -2    6.89    0.76 
   4  -6   2    6.68    0.44 
   4  -6   2    7.40    0.68 
  -4  -6  -2    6.87    0.76 
   4  -6   2    5.87    0.37 
  -4  -6  -2    7.74    0.62 
  -4  -6  -2    6.80    0.83 
   4  -6   2    6.85    0.61 
  -4   6  -2    6.86    0.75 
   4   6   2    7.20    0.66 
  -4   6  -2    6.38    0.55 
   4   6   2    6.07    0.65 
   4   6   2    8.36    0.87 
  -4   6  -2    8.08    0.63 
  -4   6  -2    6.80    0.46 
   4   6   2    7.70    0.72 
  -4   6  -2    8.41    0.83 
   4   6   2    6.78    0.84 
   4   6   2    6.57    0.85 
  -4   6  -2    8.21    0.71 
   6  -6   2   21.01    1.17 
  -6  -6  -2   24.29    1.45 
   6  -6   2   22.08    1.07 
   6  -6   2   21.98    1.05 
   6  -6   2   24.19    0.97 
  -6  -6  -2   20.74    1.34 
   6  -6   2   20.57    0.83 
   6  -6   2   22.78    1.15 
  -6  -6  -2   21.55    1.29 
  -6  -6  -2   25.12    1.43 
  -6  -6  -2   22.29    1.16 
   6  -6   2   21.63    1.11 
  -6  -6  -2   21.58    1.34 
  -6  -6  -2   23.32    1.34 
   6   6   2   22.84    1.44 
   6   6   2   22.96    1.41 
   6   6   2   22.00    1.23 
   6   6   2   20.77    1.41 
  -6   6  -2   23.18    1.32 
  -6   6  -2   23.52    1.04 
  -6   6  -2   20.77    1.10 
  -6   6  -2   21.11    1.30 
   6   6   2   25.20    1.28 
   8  -6   2   79.05    2.71 
   8  -6   2   76.70    2.78 
  -8  -6  -2   82.10    3.40 
  -8  -6  -2   77.97    3.27 
  -8  -6  -2   76.74    3.27 
   8  -6   2   79.92    3.30 
   8  -6   2   81.96    2.92 
  -8  -6  -2   78.72    3.34 
  -8  -6  -2   77.29    3.07 
   8  -6   2   82.37    3.13 
   8  -6   2   78.75    2.73 
   8  -6   2   76.70    2.69 
  -8  -6  -2   82.87    3.24 
   8  -6   2   78.36    2.86 
  -8  -6  -2   80.05    3.25 
  -8   6  -2   82.10    3.19 
   8   6   2   82.10    3.21 
  -8   6  -2   78.92    3.22 
  -8   6  -2   80.70    2.91 
   8   6   2   85.14    3.40 
  -8   6  -2   81.69    2.80 
   8   6   2   78.98    3.32 
   8   6   2   79.74    3.40 
   8   6   2   82.43    3.16 
   8   6   2   83.35    3.28 
  10  -6   2   49.28    1.83 
  10  -6   2   46.85    1.82 
  10  -6   2   52.00    1.86 
 -10  -6  -2   47.84    2.33 
 -10  -6  -2   51.94    2.34 
  10  -6   2   54.55    2.40 
 -10  -6  -2   49.84    2.39 
  10  -6   2   50.35    1.92 
 -10  -6  -2   50.58    2.50 
 -10  -6  -2   50.50    2.50 
  10   6   2   49.88    2.43 
 -10   6  -2   50.75    2.32 
  10   6   2   51.13    2.55 
  10   6   2   53.70    2.51 
 -10   6  -2   49.21    1.91 
 -10   6  -2   46.21    2.20 
  10   6   2   52.59    2.29 
 -10   6  -2   48.33    1.79 
  12  -6   2  109.84    3.91 
  12  -6   2  102.35    3.96 
  12  -6   2  112.27    3.83 
  12  -6   2  119.26    4.46 
  12  -6   2  114.38    3.91 
 -12  -6  -2  114.61    4.45 
 -12  -6  -2  113.34    4.45 
 -12  -6  -2  117.24    4.72 
 -12  -6  -2  111.39    4.46 
 -12  -6  -2  117.32    4.64 
 -12   6  -2  112.97    3.88 
  12   6   2  113.20    4.66 
 -12   6  -2  110.57    3.79 
  12   6   2  118.87    4.39 
 -12   6  -2  113.08    4.29 
  12   6   2  110.26    4.58 
  12   6   2  122.81    4.57 
 -14  -6  -2   22.63    1.61 
 -14  -6  -2   23.36    1.74 
  14  -6   2   24.07    1.52 
 -14  -6  -2   21.30    1.62 
  14  -6   2   23.20    0.99 
  14  -6   2   17.42    1.24 
 -14  -6  -2   20.43    1.81 
  14  -6   2   20.89    1.09 
  14  -6   2   20.64    0.89 
 -14   6  -2   22.29    1.41 
 -14   6  -2   20.34    1.33 
  14   6   2   22.54    1.79 
  14   6   2   24.61    1.72 
  14   6   2   23.29    1.52 
  16  -6   2   12.72    1.15 
  16  -6   2   10.28    0.65 
 -16  -6  -2   10.60    1.33 
 -16  -6  -2   11.57    1.31 
 -16  -6  -2   11.37    1.54 
  16  -6   2   10.49    0.88 
 -16  -6  -2   10.43    1.48 
 -16   6  -2   10.06    1.16 
 -16   6  -2    9.79    1.20 
  16   6   2   10.86    1.30 
  16   6   2    9.92    1.58 
 -18  -6  -2   17.07    1.66 
  18  -6   2   16.30    1.38 
  18  -6   2   16.58    0.92 
 -18  -6  -2   14.32    1.81 
 -18  -6  -2   17.80    1.31 
  18   6   2   16.07    2.13 
  18   6   2   17.52    1.59 
 -18   6  -2   15.05    1.52 
 -20  -6  -2    6.02    1.08 
  20  -6   2    7.71    0.81 
 -20  -6  -2    6.08    1.72 
 -20  -6  -2    4.62    1.28 
  20  -6   2    9.74    1.21 
  20   6   2    7.54    1.40 
  20   6   2    3.78    1.51 
  22  -6   2    5.33    1.39 
 -22  -6  -2    3.96    1.00 
  22  -6   2    4.36    0.95 
  22   6   2    3.71    1.21 
  22   6   2    1.79    1.30 
  21  -7  -2   11.11    1.31 
  21   7  -2    9.97    1.86 
  21   7  -2   10.66    1.79 
  21   7  -2    8.78    1.51 
 -19  -7   2   10.35    1.67 
  19  -7  -2   13.69    1.38 
 -19  -7   2   11.66    1.50 
  19   7  -2   11.85    1.65 
  19   7  -2   11.29    1.92 
  19   7  -2    9.82    1.46 
  17  -7  -2   24.65    1.69 
 -17  -7   2   27.89    1.96 
 -17  -7   2   26.46    1.88 
 -17  -7   2   20.84    2.23 
  17   7  -2   24.02    2.40 
 -17   7   2   26.21    1.86 
  17   7  -2   23.29    1.93 
  17   7  -2   26.67    1.82 
 -15  -7   2   56.93    2.95 
 -15  -7   2   56.18    2.74 
  15  -7  -2   55.28    2.33 
 -15  -7   2   53.45    3.02 
  15  -7  -2   59.88    2.77 
  15   7  -2   55.54    3.05 
  15   7  -2   58.56    2.71 
 -15   7   2   51.87    2.74 
  15   7  -2   52.41    3.03 
  13  -7  -2   34.24    1.97 
 -13  -7   2   32.64    2.02 
 -13  -7   2   34.12    1.94 
  13  -7  -2   30.90    1.26 
 -13  -7   2   35.66    2.20 
  13  -7  -2   34.27    1.38 
 -13  -7   2   30.77    2.00 
  13  -7  -2   31.15    1.50 
 -13  -7   2   27.33    2.39 
  13   7  -2   31.99    2.06 
  13   7  -2   28.13    1.35 
  13   7  -2   29.74    1.99 
  13   7  -2   31.29    1.83 
  13   7  -2   34.31    2.21 
  13   7  -2   34.01    2.12 
 -13   7   2   32.76    1.95 
 -11  -7   2    2.90    0.73 
  11  -7  -2    4.26    0.57 
 -11  -7   2    4.46    1.07 
  11  -7  -2    4.85    0.54 
 -11  -7   2    4.00    0.93 
  11  -7  -2    3.61    0.58 
  11  -7  -2    3.28    0.49 
 -11  -7   2    4.88    1.04 
 -11  -7   2    3.37    0.78 
  11   7  -2    5.44    1.09 
 -11   7   2    4.06    0.96 
  11   7  -2    4.50    1.04 
  11   7  -2    3.93    0.56 
  11   7  -2    4.75    0.94 
  11   7  -2    4.32    1.12 
  11   7  -2    3.09    0.93 
 -11   7   2    4.65    0.37 
 -11   7   2    3.62    0.41 
   9  -7  -2    0.11    0.23 
  -9  -7   2   -0.25    0.50 
   9  -7  -2   -0.19    0.35 
   9  -7  -2    0.08    0.19 
   9  -7  -2   -0.21    0.30 
  -9  -7   2   -0.35    0.48 
   9  -7  -2   -0.20    0.27 
  -9  -7   2    0.00    0.59 
  -9  -7   2   -0.15    0.46 
  -9  -7   2   -0.34    0.49 
   9  -7  -2    0.09    0.31 
  -9  -7   2   -0.46    0.46 
   9   7  -2   -0.30    0.45 
   9   7  -2    0.29    0.52 
   9   7  -2    0.59    0.54 
  -9   7   2   -0.55    0.27 
   9   7  -2    0.15    0.31 
   9   7  -2   -0.28    0.52 
   9   7  -2   -0.55    0.53 
  -9   7   2   -0.69    0.24 
  -9   7   2   -0.40    0.53 
   9   7  -2   -0.24    0.62 
   7  -7  -2   14.08    0.94 
  -7  -7   2   14.22    1.09 
   7  -7  -2   13.32    0.89 
   7  -7  -2   13.71    0.87 
   7  -7  -2   11.20    0.69 
   7  -7  -2   12.44    0.73 
  -7  -7   2   15.07    1.16 
  -7  -7   2   12.85    1.16 
  -7  -7   2   12.52    1.20 
  -7  -7   2   14.36    1.19 
   7  -7  -2   13.58    0.73 
  -7  -7   2   13.46    1.18 
   7   7  -2   12.85    1.23 
  -7   7   2   13.01    0.83 
  -7   7   2   11.89    0.82 
   7   7  -2   14.09    1.24 
   7   7  -2   13.19    1.03 
   7   7  -2   14.38    1.02 
  -7   7   2   14.47    1.19 
   7   7  -2   15.19    1.25 
   7   7  -2   13.83    0.87 
   7   7  -2   12.50    1.19 
   5  -7  -2   26.21    1.18 
  -5  -7   2   27.51    1.61 
   5  -7  -2   29.78    1.33 
  -5  -7   2   30.83    1.51 
  -5  -7   2   27.75    1.61 
  -5  -7   2   30.23    1.50 
  -5  -7   2   26.69    1.65 
  -5  -7   2   27.23    1.62 
   5  -7  -2   26.19    1.36 
   5  -7  -2   28.24    1.23 
   5  -7  -2   31.53    1.47 
   5  -7  -2   28.13    1.41 
  -5  -7   2   27.59    1.58 
   5  -7  -2   25.29    1.23 
   5   7  -2   29.87    1.38 
   5   7  -2   27.60    1.59 
   5   7  -2   27.98    1.39 
   5   7  -2   28.71    1.44 
  -5   7   2   26.67    1.36 
  -5   7   2   32.75    1.68 
  -5   7   2   28.83    1.38 
   5   7  -2   30.44    1.39 
   5   7  -2   27.30    1.61 
   5   7  -2   26.24    1.64 
   5   7  -2   28.88    1.60 
  -5   7   2   27.42    1.13 
  -3  -7   2   42.16    1.98 
   3  -7  -2   39.11    1.82 
   3  -7  -2   41.64    1.83 
   3  -7  -2   41.41    1.67 
   3  -7  -2   37.63    1.70 
  -3  -7   2   38.64    2.01 
   3  -7  -2   40.94    1.80 
   3  -7  -2   37.40    1.63 
  -3  -7   2   40.34    1.94 
   3  -7  -2   40.66    1.49 
  -3  -7   2   41.28    1.95 
  -3  -7   2   43.11    1.76 
  -3  -7   2   40.63    1.56 
   3  -7  -2   39.18    1.84 
  -3  -7   2   38.87    1.78 
  -3  -7   2   38.11    1.96 
   3   7  -2   41.43    1.70 
   3   7  -2   42.03    1.66 
  -3   7   2   42.03    1.71 
  -3   7   2   41.82    1.83 
  -3   7   2   41.31    1.98 
   3   7  -2   38.71    1.93 
  -3   7   2   38.15    1.81 
   3   7  -2   42.16    2.02 
   3   7  -2   40.83    1.98 
   3   7  -2   41.09    1.78 
   3   7  -2   41.68    1.94 
   1  -7  -2   89.79    3.31 
  -1  -7   2   91.87    3.17 
   1  -7  -2   86.30    3.47 
   1  -7  -2   88.17    3.46 
  -1  -7   2   91.63    3.53 
  -1  -7   2   86.75    3.55 
  -1  -7   2   86.65    3.08 
  -1  -7   2   88.86    3.48 
   1  -7  -2   92.00    3.52 
  -1  -7   2   90.49    3.32 
   1  -7  -2   88.88    3.47 
  -1  -7   2   92.36    3.50 
   1  -7  -2   93.34    3.21 
  -1  -7   2   84.59    3.21 
   1  -7  -2   91.53    3.39 
  -1  -7   2   92.29    3.61 
  -1   7   2   87.62    3.40 
   1   7  -2   96.80    3.60 
   1   7  -2   87.54    3.09 
   1   7  -2   90.36    3.20 
  -1   7   2   87.21    3.48 
   1   7  -2   92.57    3.51 
   1   7  -2   93.03    3.46 
   1   7  -2   90.29    3.47 
  -1   7   2   92.21    3.48 
   1   7  -2   95.86    3.44 
  -1   7   2   91.82    3.56 
  -1  -7  -2   33.39    1.49 
   1  -7   2   33.87    1.43 
   1  -7   2   34.02    1.70 
  -1  -7  -2   32.91    1.69 
  -1  -7  -2   31.48    1.52 
  -1  -7  -2   34.41    1.75 
   1  -7   2   32.86    1.59 
  -1  -7  -2   32.94    1.69 
  -1  -7  -2   33.94    1.62 
   1  -7   2   31.58    1.65 
  -1  -7  -2   31.79    1.64 
   1  -7   2   32.04    1.58 
   1  -7   2   32.59    1.33 
   1  -7   2   31.92    1.57 
   1   7   2   30.21    1.64 
  -1   7  -2   31.87    1.61 
   1   7   2   34.12    1.71 
  -1   7  -2   34.70    1.62 
  -1   7  -2   33.35    1.50 
   1   7   2   35.99    1.50 
  -1   7  -2   31.66    1.53 
   1   7   2   32.51    1.64 
   1   7   2   36.37    1.76 
  -1   7  -2   31.68    1.66 
  -3  -7  -2   13.50    1.12 
  -3  -7  -2   14.53    1.12 
   3  -7   2   14.04    0.69 
   3  -7   2   14.63    0.78 
  -3  -7  -2   16.96    1.08 
  -3  -7  -2   13.79    1.06 
  -3  -7  -2   15.85    0.87 
   3  -7   2   14.67    0.97 
   3  -7   2   14.04    1.02 
  -3  -7  -2   14.27    1.15 
   3  -7   2   14.82    1.07 
   3  -7   2   13.87    0.94 
   3  -7   2   16.80    0.95 
  -3  -7  -2   13.99    0.99 
  -3  -7  -2   13.58    1.11 
  -3   7  -2   14.68    0.81 
  -3   7  -2   14.34    0.88 
   3   7   2   15.09    0.92 
  -3   7  -2   15.37    1.00 
  -3   7  -2   14.73    1.04 
  -3   7  -2   15.89    1.12 
   3   7   2   14.68    1.18 
   3   7   2   15.81    0.92 
   3   7   2   13.35    1.02 
   3   7   2   13.87    1.16 
   3   7   2   14.26    1.15 
  -5  -7  -2    2.89    0.64 
   5  -7   2    2.35    0.51 
   5  -7   2    2.50    0.34 
   5  -7   2    2.28    0.30 
   5  -7   2    2.41    0.47 
  -5  -7  -2    2.88    0.60 
  -5  -7  -2    4.00    0.59 
  -5  -7  -2    1.72    0.56 
  -5  -7  -2    2.44    0.66 
   5  -7   2    1.85    0.46 
  -5  -7  -2    2.98    0.71 
   5  -7   2    2.34    0.59 
   5  -7   2    2.51    0.54 
  -5  -7  -2    3.51    0.84 
  -5   7  -2    2.71    0.63 
   5   7   2    3.17    0.63 
   5   7   2    3.15    0.70 
  -5   7  -2    2.36    0.34 
   5   7   2    2.85    0.59 
   5   7   2    2.68    0.66 
   5   7   2    3.25    0.83 
  -5   7  -2    2.96    0.53 
  -5   7  -2    2.69    0.62 
   5   7   2    4.14    0.68 
   7  -7   2   26.63    1.36 
  -7  -7  -2   27.08    1.64 
   7  -7   2   25.18    1.08 
  -7  -7  -2   27.16    1.52 
  -7  -7  -2   27.14    1.62 
  -7  -7  -2   25.46    1.56 
  -7  -7  -2   26.00    1.61 
  -7  -7  -2   25.12    1.67 
   7  -7   2   24.94    1.31 
  -7  -7  -2   27.13    1.38 
   7  -7   2   26.02    1.25 
   7  -7   2   23.07    0.94 
   7   7   2   26.39    1.69 
   7   7   2   26.05    1.44 
   7   7   2   25.10    1.62 
  -7   7  -2   27.39    1.19 
   7   7   2   25.72    1.38 
   7   7   2   24.28    1.68 
   7   7   2   28.69    1.48 
  -7   7  -2   25.75    1.53 
  -7   7  -2   25.38    1.54 
  -7   7  -2   24.45    1.29 
   9  -7   2   17.60    0.92 
   9  -7   2   17.43    1.40 
  -9  -7  -2   18.05    1.61 
   9  -7   2   16.31    0.71 
   9  -7   2   17.83    1.06 
  -9  -7  -2   17.67    1.34 
  -9  -7  -2   14.08    1.38 
   9  -7   2   14.73    0.66 
   9  -7   2   16.55    0.99 
  -9  -7  -2   16.88    1.38 
  -9  -7  -2   16.28    1.28 
  -9  -7  -2   18.02    1.42 
   9   7   2   15.50    1.39 
  -9   7  -2   17.35    0.82 
   9   7   2   17.24    1.22 
  -9   7  -2   16.02    1.27 
   9   7   2   16.64    1.42 
  -9   7  -2   17.27    1.28 
   9   7   2   14.77    1.41 
  -9   7  -2   15.13    0.96 
  11  -7   2   41.55    1.69 
 -11  -7  -2   42.38    2.38 
 -11  -7  -2   42.09    2.37 
 -11  -7  -2   41.58    2.29 
  11  -7   2   39.39    1.60 
 -11  -7  -2   46.86    2.27 
  11  -7   2   43.60    1.84 
  11  -7   2   45.86    2.31 
 -11  -7  -2   41.85    2.25 
  11  -7   2   43.62    1.82 
 -11   7  -2   42.14    1.59 
  11   7   2   45.89    2.18 
  11   7   2   43.82    2.40 
  11   7   2   44.99    2.36 
 -11   7  -2   42.80    1.74 
 -11   7  -2   44.69    2.22 
  11   7   2   46.44    2.47 
 -11   7  -2   43.39    2.22 
  13  -7   2   27.90    1.36 
 -13  -7  -2   30.73    2.24 
  13  -7   2   32.49    1.95 
 -13  -7  -2   28.46    1.86 
 -13  -7  -2   27.36    2.04 
  13  -7   2   30.66    1.20 
 -13  -7  -2   33.02    1.98 
 -13   7  -2   28.15    1.74 
 -13   7  -2   29.83    1.13 
 -13   7  -2   27.93    1.24 
  13   7   2   28.70    2.07 
  13   7   2   32.76    1.87 
  15  -7   2    0.45    0.63 
 -15  -7  -2    0.91    0.76 
 -15  -7  -2    0.32    0.70 
  15  -7   2   -0.08    0.31 
 -15  -7  -2    0.14    0.71 
  15   7   2    0.03    0.82 
  15   7   2    0.24    0.73 
 -15   7  -2    0.86    0.75 
 -17  -7  -2   -0.32    0.78 
 -17  -7  -2   -0.40    0.77 
 -17  -7  -2    0.33    0.70 
  17  -7   2   -0.06    0.67 
 -17   7  -2   -0.25    0.70 
  17   7   2   -0.21    0.93 
  17   7   2   -0.60    0.81 
  19  -7   2    0.65    0.75 
 -19  -7  -2    0.31    1.23 
 -19  -7  -2    1.34    0.72 
  19   7   2    2.03    1.19 
  19   7   2    0.28    0.95 
  21  -7   2   12.98    1.45 
 -21  -7  -2   10.67    1.39 
  21   7   2   10.06    1.68 
  21   7   2   12.26    2.08 
  20  -8  -2    1.74    0.82 
  20   8  -2    1.98    1.34 
  20   8  -2    1.80    1.09 
  20   8  -2    2.10    1.25 
  18  -8  -2   -0.04    0.70 
 -18  -8   2    0.94    1.12 
 -18  -8   2    1.63    1.06 
  18   8  -2    0.74    1.08 
  18   8  -2   -0.92    0.99 
  18   8  -2    0.83    0.90 
 -16  -8   2   11.85    1.47 
 -16  -8   2   15.82    1.64 
 -16  -8   2   14.16    1.93 
  16  -8  -2   14.88    1.53 
  16   8  -2   11.88    1.97 
 -16   8   2   15.02    1.55 
  16   8  -2    9.78    1.79 
  16   8  -2   15.92    1.61 
 -14  -8   2    0.27    0.67 
  14  -8  -2    0.21    0.38 
  14  -8  -2    0.20    0.67 
 -14  -8   2    0.69    0.76 
  14  -8  -2    0.28    0.48 
 -14  -8   2    0.26    0.76 
 -14   8   2    1.99    0.83 
  14   8  -2    0.34    0.88 
  14   8  -2    0.57    0.74 
  14   8  -2    0.35    0.83 
  12  -8  -2    5.51    0.69 
 -12  -8   2    4.50    1.10 
  12  -8  -2    4.25    0.71 
 -12  -8   2    4.61    0.91 
  12  -8  -2    3.23    0.65 
 -12  -8   2    4.34    1.14 
  12   8  -2    5.67    0.96 
 -12   8   2    5.05    1.09 
 -12   8   2    5.03    0.46 
 -12   8   2    5.01    0.40 
  12   8  -2    4.78    1.20 
  12   8  -2    4.17    1.07 
 -10  -8   2    2.80    0.85 
  10  -8  -2    2.48    0.41 
  10  -8  -2    2.68    0.66 
  10  -8  -2    2.39    0.59 
 -10  -8   2    3.54    1.21 
  10  -8  -2    2.13    0.51 
 -10  -8   2    2.32    0.73 
 -10  -8   2    2.16    0.71 
 -10  -8   2    3.23    0.81 
  10   8  -2    2.18    0.48 
  10   8  -2    2.75    0.80 
  10   8  -2    2.38    0.72 
  10   8  -2    2.63    0.85 
 -10   8   2    4.17    0.99 
  10   8  -2    3.23    0.94 
 -10   8   2    2.46    0.54 
 -10   8   2    1.84    0.40 
   8  -8  -2    0.92    0.45 
  -8  -8   2    0.68    0.56 
  -8  -8   2    1.26    0.61 
   8  -8  -2    1.50    0.47 
  -8  -8   2    0.75    0.61 
   8  -8  -2    0.85    0.47 
  -8  -8   2    1.05    0.57 
  -8  -8   2    1.46    0.59 
   8  -8  -2    1.18    0.33 
  -8  -8   2    1.32    0.75 
   8   8  -2    1.01    0.72 
   8   8  -2    0.82    0.41 
  -8   8   2    0.28    0.61 
   8   8  -2    0.51    0.54 
  -8   8   2    0.63    0.41 
   8   8  -2    0.48    0.64 
   8   8  -2    0.91    0.66 
  -8   8   2    0.16    0.37 
   8   8  -2    1.68    0.68 
   8   8  -2    1.58    0.60 
   6  -8  -2    0.72    0.51 
  -6  -8   2    1.00    0.53 
  -6  -8   2    1.08    0.56 
   6  -8  -2    2.47    0.52 
  -6  -8   2    1.56    0.68 
   6  -8  -2    1.22    0.52 
  -6  -8   2    1.13    0.59 
  -6  -8   2    0.92    0.58 
   6  -8  -2    0.62    0.36 
   6  -8  -2    1.00    0.44 
   6  -8  -2    1.77    0.39 
  -6  -8   2    1.43    0.55 
   6   8  -2    0.52    0.59 
   6   8  -2    1.35    0.54 
   6   8  -2    0.53    0.45 
  -6   8   2    1.26    0.45 
   6   8  -2    0.42    0.43 
   6   8  -2    1.34    0.65 
  -6   8   2    1.31    0.66 
   6   8  -2    1.07    0.61 
  -6   8   2    0.64    0.41 
   6   8  -2    0.48    0.64 
   4  -8  -2    1.26    0.47 
  -4  -8   2    1.19    0.56 
   4  -8  -2    1.06    0.39 
  -4  -8   2    1.21    0.60 
  -4  -8   2    0.95    0.67 
  -4  -8   2    1.38    0.61 
  -4  -8   2    1.00    0.46 
   4  -8  -2    0.39    0.50 
  -4  -8   2    0.99    0.51 
  -4  -8   2    0.73    0.47 
   4  -8  -2    0.76    0.41 
   4  -8  -2    0.71    0.43 
   4   8  -2    0.31    0.49 
  -4   8   2    0.59    0.45 
   4   8  -2    0.71    0.53 
  -4   8   2    0.63    0.43 
   4   8  -2    0.81    0.47 
   4   8  -2    1.32    0.63 
  -4   8   2    0.91    0.35 
   4   8  -2    0.27    0.38 
   4   8  -2    1.23    0.63 
   4   8  -2   -0.25    0.42 
  -4   8   2    1.51    0.62 
  -2  -8   2   29.63    1.64 
  -2  -8   2   27.88    1.69 
  -2  -8   2   28.37    1.45 
  -2  -8   2   27.39    1.19 
  -2  -8   2   30.19    1.65 
   2  -8  -2   28.46    1.46 
  -2  -8   2   29.54    1.33 
   2  -8  -2   27.95    1.58 
   2  -8  -2   31.89    1.44 
   2  -8  -2   28.91    1.21 
   2  -8  -2   25.86    1.56 
  -2  -8   2   28.69    1.76 
  -2  -8   2   28.43    1.62 
   2  -8  -2   29.36    1.63 
   2  -8  -2   30.73    1.58 
  -2   8   2   27.33    1.58 
   2   8  -2   31.61    1.36 
  -2   8   2   29.93    1.60 
  -2   8   2   29.57    1.68 
   2   8  -2   32.23    1.70 
   2   8  -2   29.14    1.52 
   2   8  -2   27.79    1.61 
  -2   8   2   26.64    1.43 
   2   8  -2   25.76    1.54 
   2   8  -2   28.21    1.22 
   2   8  -2   31.67    1.73 
   0  -8   2    3.40    0.74 
   0  -8  -2    2.95    0.66 
   0  -8   2    2.73    0.58 
   0  -8   2    2.55    0.49 
   0  -8  -2    3.03    0.75 
   0  -8  -2    3.82    0.56 
   0  -8  -2    3.27    0.71 
   0  -8   2    3.00    0.76 
   0  -8  -2    3.36    0.70 
   0  -8   2    4.28    0.65 
   0  -8   2    2.10    0.54 
   0  -8  -2    2.86    0.76 
   0  -8   2    3.38    0.75 
   0  -8   2    2.38    0.38 
   0  -8  -2    3.03    0.59 
   0   8  -2    2.90    0.74 
   0   8  -2    2.75    0.47 
   0   8  -2    3.08    0.64 
   0   8   2    2.76    0.64 
   0   8  -2    2.63    0.63 
   0   8   2    2.16    0.61 
   0   8  -2    2.74    0.56 
   0   8   2    2.41    0.62 
   0   8   2    2.00    0.61 
   0   8  -2    3.05    0.72 
   0   8   2    4.89    0.64 
  -2  -8  -2    1.16    0.55 
  -2  -8  -2    0.81    0.47 
   2  -8   2    0.50    0.45 
   2  -8   2    1.43    0.38 
  -2  -8  -2    0.96    0.37 
  -2  -8  -2    0.92    0.44 
   2  -8   2    0.05    0.55 
   2  -8   2    1.27    0.77 
  -2  -8  -2    0.69    0.52 
  -2  -8  -2    1.49    0.53 
  -2  -8  -2    1.57    0.57 
  -2  -8  -2    0.18    0.53 
   2  -8   2   -0.11    0.45 
   2  -8   2    0.70    0.30 
   2  -8   2    0.42    0.42 
   2   8   2    0.84    0.52 
  -2   8  -2    0.64    0.38 
   2   8   2    0.63    0.43 
   2   8   2    0.82    0.52 
  -2   8  -2    0.29    0.45 
   2   8   2    0.40    0.34 
   2   8   2    0.72    0.55 
   2   8   2    0.82    0.50 
  -2   8  -2    0.95    0.46 
  -2   8  -2   -0.14    0.46 
  -2   8  -2    1.20    0.53 
   4  -8   2    0.63    0.25 
  -4  -8  -2    0.61    0.39 
  -4  -8  -2    0.59    0.51 
   4  -8   2    0.27    0.36 
  -4  -8  -2   -0.14    0.51 
   4  -8   2   -0.39    0.48 
  -4  -8  -2    0.60    0.49 
  -4  -8  -2    0.83    0.47 
   4  -8   2    0.28    0.45 
  -4  -8  -2    0.94    0.58 
  -4  -8  -2    0.55    0.47 
   4  -8   2    0.35    0.29 
   4  -8   2    0.19    0.41 
  -4   8  -2    0.10    0.37 
   4   8   2    0.59    0.58 
   4   8   2    0.57    0.51 
  -4   8  -2    0.59    0.47 
   4   8   2    0.29    0.57 
  -4   8  -2    0.06    0.51 
  -4   8  -2    0.31    0.29 
   4   8   2   -0.02    0.37 
   4   8   2    0.84    0.55 
   4   8   2    0.09    0.49 
  -6  -8  -2   18.51    1.47 
  -6  -8  -2   19.35    1.39 
   6  -8   2   18.54    1.22 
  -6  -8  -2   21.74    1.20 
   6  -8   2   18.21    0.98 
   6  -8   2   17.52    0.80 
   6  -8   2   16.91    1.12 
  -6  -8  -2   17.79    1.37 
  -6  -8  -2   17.45    1.48 
   6  -8   2   19.82    1.29 
  -6  -8  -2   17.14    1.41 
  -6  -8  -2   18.57    1.36 
   6   8   2   16.69    1.46 
  -6   8  -2   20.72    1.12 
   6   8   2   17.80    1.53 
   6   8   2   18.85    1.25 
  -6   8  -2   21.25    1.42 
   6   8   2   18.05    1.46 
   6   8   2   18.11    1.20 
  -6   8  -2   17.85    1.19 
   6   8   2   22.27    1.33 
  -8  -8  -2    2.28    0.71 
   8  -8   2    2.57    0.82 
  -8  -8  -2    3.07    0.76 
   8  -8   2    1.42    0.53 
  -8  -8  -2    2.50    0.71 
  -8  -8  -2    2.83    0.75 
  -8  -8  -2    2.00    0.68 
  -8  -8  -2    2.24    0.74 
   8  -8   2    1.32    0.58 
   8   8   2    1.39    0.75 
   8   8   2    1.82    0.73 
   8   8   2    1.37    0.68 
   8   8   2    2.48    0.60 
  -8   8  -2    3.28    0.76 
   8   8   2    1.94    0.74 
  -8   8  -2    3.72    0.55 
  -8   8  -2    2.64    0.55 
  10  -8   2    5.90    1.14 
  10  -8   2    6.26    0.82 
 -10  -8  -2    8.92    1.13 
 -10  -8  -2    6.83    1.56 
  10  -8   2    6.06    0.87 
 -10  -8  -2    7.32    1.18 
 -10  -8  -2    9.82    1.32 
  10   8   2    5.76    1.35 
  10   8   2    6.70    0.99 
 -10   8  -2    8.53    1.09 
 -10   8  -2    6.72    0.76 
 -10   8  -2    6.26    0.55 
  10   8   2    5.79    0.89 
  10   8   2    7.39    1.27 
 -12  -8  -2    0.06    0.68 
  12  -8   2    0.21    0.51 
 -12  -8  -2    0.12    0.70 
 -12  -8  -2   -0.32    0.67 
  12  -8   2    0.98    0.73 
  12  -8   2    0.13    0.43 
  12   8   2   -0.06    0.67 
 -12   8  -2    0.11    0.37 
  12   8   2    0.32    0.81 
 -12   8  -2    0.04    0.21 
  14  -8   2   -0.15    0.49 
  14  -8   2   -0.61    0.61 
 -14  -8  -2   -0.17    0.82 
 -14  -8  -2    0.18    0.71 
 -14  -8  -2    0.44    0.78 
  14   8   2    0.30    0.75 
  14   8   2   -0.33    0.87 
 -16  -8  -2    1.23    0.86 
 -16  -8  -2    1.02    0.91 
  16  -8   2    0.74    0.53 
 -16  -8  -2    1.87    0.98 
  16  -8   2    1.50    0.80 
  16   8   2    2.05    0.92 
  16   8   2    2.21    1.19 
 -18  -8  -2   -0.02    0.94 
  18  -8   2   -0.01    0.79 
  18   8   2   -0.14    0.95 
  18   8   2    0.15    1.12 
 -17  -9   2    6.56    1.59 
 -17  -9   2    7.38    1.71 
  17  -9  -2    7.32    1.39 
  17   9  -2    7.96    1.44 
  17   9  -2    7.05    1.90 
  17   9  -2    5.50    1.47 
 -17   9   2    8.84    1.51 
  15  -9  -2    5.49    0.83 
 -15  -9   2    6.75    1.45 
 -15  -9   2    5.39    1.25 
  15  -9  -2    6.39    1.40 
 -15  -9   2    6.86    1.32 
 -15   9   2    7.00    1.35 
  15   9  -2    6.17    1.34 
  15   9  -2    5.50    1.51 
  15   9  -2    6.75    1.25 
 -13  -9   2    1.96    0.99 
 -13  -9   2    2.08    0.94 
  13  -9  -2    2.80    0.75 
  13  -9  -2    2.44    0.96 
 -13  -9   2    1.68    0.82 
  13   9  -2    2.82    1.04 
 -13   9   2    2.80    0.92 
  13   9  -2    2.13    1.02 
 -13   9   2    2.28    0.39 
  13   9  -2    4.59    1.11 
 -11  -9   2   -0.34    0.65 
 -11  -9   2    0.66    0.84 
  11  -9  -2    0.96    0.57 
 -11  -9   2    0.67    0.72 
 -11   9   2    0.63    0.37 
 -11   9   2    1.11    0.34 
  11   9  -2    1.11    0.74 
  11   9  -2    0.65    0.80 
 -11   9   2    0.37    0.70 
  11   9  -2   -0.56    0.77 
   9  -9  -2    2.16    0.64 
  -9  -9   2    1.85    0.70 
  -9  -9   2    1.13    0.69 
  -9  -9   2    2.70    0.96 
  -9   9   2    0.29    0.45 
   9   9  -2    0.43    0.82 
  -9   9   2    2.57    0.83 
   9   9  -2    1.13    0.74 
   9   9  -2    1.10    0.75 
   9   9  -2    0.99    0.68 
  -9   9   2    2.29    0.52 
   9   9  -2    1.28    0.49 
  -7  -9   2    4.41    1.05 
   7  -9  -2    2.02    0.45 
   7  -9  -2    2.82    0.67 
  -7  -9   2    2.31    0.71 
  -7  -9   2    2.76    0.93 
  -7  -9   2    2.10    0.71 
   7   9  -2    1.40    0.72 
   7   9  -2    2.77    0.86 
  -7   9   2    3.17    0.63 
  -7   9   2    2.58    0.56 
  -7   9   2    1.69    0.76 
   7   9  -2    1.46    0.55 
  -7   9   2    3.64    0.76 
   7   9  -2    1.58    0.59 
   7   9  -2    2.69    0.70 
   7   9  -2    3.07    0.82 
   5  -9  -2   16.42    1.28 
   5  -9  -2   17.63    1.12 
  -5  -9   2   18.56    1.59 
  -5  -9   2   18.19    1.30 
  -5  -9   2   14.16    1.31 
   5  -9  -2   15.28    1.04 
  -5  -9   2   16.60    1.20 
   5   9  -2   16.13    1.19 
   5   9  -2   19.00    1.50 
  -5   9   2   16.19    0.87 
   5   9  -2   16.30    1.41 
   5   9  -2   14.43    1.38 
   5   9  -2   19.28    1.19 
  -5   9   2   16.88    1.18 
  -5   9   2   18.37    1.46 
   5   9  -2   14.57    1.05 
   5   9  -2   16.81    1.52 
  -5   9   2   17.29    1.22 
   3  -9  -2    4.57    0.72 
  -3  -9   2    5.83    1.18 
  -3  -9   2    4.38    0.93 
   3  -9  -2    4.00    0.96 
  -3  -9   2    3.82    0.67 
  -3  -9   2    4.76    0.84 
   3  -9  -2    4.30    0.82 
  -3  -9   2    4.31    0.91 
   3   9  -2    3.03    0.57 
   3   9  -2    3.43    0.82 
   3   9  -2    4.45    1.08 
   3   9  -2    4.83    0.71 
   3   9  -2    1.99    0.65 
  -3   9   2    4.09    0.85 
   3   9  -2    5.15    1.04 
  -3   9   2    3.64    0.86 
  -3   9   2    3.42    0.87 
   3   9  -2    3.98    0.85 
   1  -9  -2    6.54    0.97 
   1  -9  -2    7.03    1.06 
   1  -9  -2    5.06    0.62 
  -1  -9   2    6.70    0.86 
  -1  -9   2    5.51    0.53 
   1  -9  -2    5.66    0.83 
  -1  -9   2    7.45    0.98 
  -1  -9   2    6.91    1.13 
  -1   9   2    6.80    1.11 
   1   9  -2    5.80    0.95 
  -1   9   2    8.01    1.06 
  -1   9   2    6.74    1.03 
   1   9  -2    6.97    0.97 
   1   9  -2    6.95    1.01 
   1   9  -2    6.50    0.69 
   1   9  -2    9.04    1.15 
  -1  -9  -2   32.37    1.89 
   1  -9   2   30.04    1.30 
   1  -9   2   30.70    1.75 
  -1  -9  -2   33.92    1.51 
   1  -9   2   33.73    1.58 
  -1  -9  -2   33.31    1.92 
  -1  -9  -2   34.43    1.77 
   1  -9   2   33.74    1.97 
  -1  -9  -2   35.00    1.63 
   1   9   2   37.37    1.95 
  -1   9  -2   33.93    1.82 
   1   9   2   34.08    1.58 
   1   9   2   35.56    1.93 
  -1   9  -2   35.27    1.84 
  -1   9  -2   33.36    1.78 
   1   9   2   31.18    1.89 
  -1   9  -2   31.93    1.90 
   3  -9   2   39.22    1.92 
  -3  -9  -2   43.82    2.09 
  -3  -9  -2   40.89    1.82 
  -3  -9  -2   46.47    2.05 
  -3  -9  -2   43.19    2.72 
   3  -9   2   45.92    2.27 
   3  -9   2   40.59    1.75 
  -3  -9  -2   40.23    2.23 
  -3  -9  -2   40.99    2.14 
   3   9   2   42.56    2.28 
  -3   9  -2   41.03    2.03 
   3   9   2   40.07    2.22 
   3   9   2   39.00    2.21 
  -3   9  -2   39.43    2.12 
   3   9   2   39.74    1.82 
   3   9   2   42.74    2.13 
   3   9   2   43.08    1.94 
  -3   9  -2   41.46    2.09 
  -5  -9  -2    5.94    0.94 
   5  -9   2    5.28    0.55 
  -5  -9  -2    4.66    0.98 
  -5  -9  -2    4.45    1.08 
  -5  -9  -2    6.13    0.77 
   5  -9   2    4.17    0.98 
  -5  -9  -2    4.82    0.94 
   5  -9   2    4.02    0.70 
  -5   9  -2    4.89    0.77 
   5   9   2    4.98    0.80 
   5   9   2    4.56    1.10 
  -5   9  -2    5.56    1.02 
   5   9   2    7.39    1.23 
   5   9   2    5.40    0.91 
  -5   9  -2    6.86    0.94 
  -5   9  -2    4.13    0.75 
   5   9   2    6.99    1.01 
   7  -9   2    0.28    0.57 
  -7  -9  -2   -0.38    0.56 
  -7  -9  -2   -0.22    0.54 
  -7  -9  -2    0.32    0.66 
  -7  -9  -2    0.34    0.51 
  -7  -9  -2   -0.54    0.52 
  -7   9  -2   -0.36    0.34 
  -7   9  -2   -0.31    0.45 
   7   9   2    0.25    0.65 
   7   9   2    0.77    0.73 
   7   9   2   -0.22    0.63 
   7   9   2    0.32    0.65 
   7   9   2    0.08    0.53 
  -7   9  -2   -0.29    0.58 
  -9  -9  -2    2.30    0.81 
  -9  -9  -2    0.95    0.72 
  -9  -9  -2    2.01    0.91 
   9  -9   2    1.09    0.80 
   9  -9   2    2.00    0.70 
   9   9   2    0.05    1.19 
   9   9   2    1.14    0.86 
  -9   9  -2    1.21    0.53 
  -9   9  -2    1.09    0.39 
   9   9   2    0.44    0.72 
  -9   9  -2    3.06    0.83 
   9   9   2    1.54    0.60 
  11  -9   2    3.65    1.07 
 -11  -9  -2    2.65    0.94 
 -11  -9  -2    2.83    0.86 
  11  -9   2    3.13    0.83 
 -11  -9  -2    5.68    1.29 
  11   9   2    2.99    0.73 
  11   9   2    2.22    0.89 
  11   9   2    1.62    0.98 
 -11   9  -2    3.05    0.75 
 -11   9  -2    3.61    0.93 
 -11   9  -2    3.24    0.50 
  13  -9   2   21.59    1.93 
  13  -9   2   20.18    1.51 
 -13  -9  -2   17.65    2.05 
 -13  -9  -2   23.16    2.14 
 -13  -9  -2   22.15    1.78 
 -13   9  -2   19.25    1.12 
  13   9   2   18.29    1.72 
  13   9   2   27.38    2.60 
 -15  -9  -2    2.22    1.07 
 -15  -9  -2    4.23    1.42 
  15  -9   2    3.41    0.77 
  15  -9   2    4.62    1.11 
  15   9   2    4.03    1.08 
 -17  -9  -2    0.94    0.97 
 -17  -9  -2   -0.43    0.91 
  17  -9   2    0.19    0.54 
  17  -9   2    1.72    0.93 
  17   9   2    0.88    1.10 
 -16 -10   2    8.25    1.91 
 -16 -10   2   13.83    2.21 
  16 -10  -2   11.85    1.01 
  16 -10  -2   12.04    1.81 
 -16  10   2   10.79    1.64 
  16  10  -2    7.84    1.62 
 -14 -10   2   31.61    3.00 
 -14 -10   2   33.13    2.90 
  14 -10  -2   39.03    2.03 
 -14 -10   2   36.87    3.35 
  14 -10  -2   42.58    2.64 
  14  10  -2   35.70    2.32 
  14  10  -2   29.72    2.64 
 -14  10   2   40.62    2.58 
 -12 -10   2   12.46    1.93 
 -12 -10   2   15.50    2.07 
  12 -10  -2   12.75    1.45 
 -12 -10   2   13.67    1.76 
  12  10  -2   17.23    1.83 
  12  10  -2   15.01    1.45 
 -12  10   2   14.76    0.93 
 -12  10   2   14.69    1.64 
  10 -10  -2    1.75    0.75 
 -10 -10   2    3.38    1.04 
 -10 -10   2    3.30    1.08 
 -10 -10   2    3.25    0.95 
  10  10  -2    2.35    1.19 
 -10  10   2    3.35    0.99 
 -10  10   2    2.69    0.61 
 -10  10   2    2.64    0.59 
  10  10  -2    3.89    0.96 
  -8 -10   2    6.46    1.17 
  -8 -10   2    6.48    1.34 
  -8 -10   2    7.26    1.24 
   8 -10  -2    5.50    1.06 
   8  10  -2    5.21    1.19 
  -8  10   2    5.80    1.20 
  -8  10   2    5.23    0.80 
   8  10  -2    6.12    1.05 
  -8  10   2    5.97    0.87 
  -6 -10   2   15.70    1.42 
   6 -10  -2   15.11    1.38 
  -6 -10   2   16.08    1.72 
  -6  10   2   18.21    1.57 
   6  10  -2   15.94    1.57 
  -6  10   2   16.15    1.27 
   6  10  -2   14.75    1.17 
  -6  10   2   14.43    1.22 
  -6  10   2   15.93    1.23 
   6  10  -2   17.60    1.26 
   4 -10  -2   20.97    1.26 
   4 -10  -2   20.70    1.63 
  -4 -10   2   21.56    1.45 
   4 -10  -2   20.21    1.39 
  -4 -10   2   21.01    1.82 
  -4  10   2   18.73    1.60 
   4  10  -2   22.10    1.48 
   4  10  -2   22.23    1.71 
   4  10  -2   21.74    1.31 
  -4  10   2   22.66    1.49 
  -4  10   2   18.27    1.42 
   2 -10  -2   18.24    1.24 
  -2 -10   2   16.78    1.32 
  -2 -10   2   19.88    1.63 
   2 -10  -2   19.53    1.65 
   2  10  -2   14.50    1.28 
  -2  10   2   17.10    1.42 
  -2  10   2   18.06    1.50 
  -2  10   2   17.11    1.41 
   2  10  -2   17.70    1.49 
   2  10  -2   17.54    1.11 
   0 -10   2   22.74    1.84 
   0 -10   2   25.62    1.55 
   0 -10  -2   22.42    1.71 
   0 -10  -2   21.94    1.52 
   0 -10  -2   22.53    1.24 
   0  10   2   27.62    2.34 
   0  10  -2   25.94    1.92 
   0  10  -2   22.54    1.61 
   0  10  -2   25.96    1.66 
   0  10   2   22.76    1.68 
   0  10   2   24.60    1.72 
   0  10  -2   23.93    1.59 
  -2 -10  -2   32.73    1.90 
  -2 -10  -2   30.16    1.52 
   2 -10   2   30.52    1.61 
   2 -10   2   29.41    2.10 
  -2 -10  -2   31.27    2.08 
   2  10   2   31.23    2.01 
  -2  10  -2   31.94    1.90 
   2  10   2   33.18    1.63 
  -2  10  -2   29.05    1.81 
  -2  10  -2   28.82    1.79 
   2  10   2   30.71    1.88 
  -4 -10  -2   -0.09    0.66 
   4 -10   2    0.00    0.70 
  -4 -10  -2   -0.09    0.70 
  -4 -10  -2   -0.19    0.56 
  -4 -10  -2    1.03    0.48 
   4  10   2    0.33    0.63 
   4  10   2    0.41    0.63 
  -4  10  -2    1.12    0.63 
   4  10   2    0.06    0.71 
  -4  10  -2   -0.29    0.46 
  -4  10  -2    0.40    0.64 
  -6 -10  -2    5.24    0.89 
  -6 -10  -2    5.21    1.23 
   6 -10   2    4.63    0.97 
  -6 -10  -2    5.70    1.19 
  -6 -10  -2    5.17    1.11 
   6  10   2    5.16    0.99 
  -6  10  -2    5.64    0.87 
  -6  10  -2    5.69    1.02 
   6  10   2    4.69    0.99 
   6  10   2    5.66    1.28 
  -6  10  -2    4.23    0.96 
   8 -10   2    2.09    0.82 
  -8 -10  -2    2.21    0.95 
  -8 -10  -2    4.01    1.12 
  -8 -10  -2    2.63    0.84 
   8  10   2    1.86    0.83 
  -8  10  -2    2.93    0.66 
  -8  10  -2    3.30    0.91 
   8  10   2    2.45    0.74 
  -8  10  -2    3.25    0.73 
 -10 -10  -2   13.48    1.50 
 -10 -10  -2   12.55    2.13 
  10 -10   2   15.56    1.75 
  10 -10   2   15.06    1.40 
 -10 -10  -2   15.36    1.75 
 -10  10  -2   12.11    1.15 
 -10  10  -2   15.77    1.69 
  10  10   2   16.55    1.55 
 -12 -10  -2   18.41    2.15 
  12 -10   2   19.32    2.05 
  12 -10   2   17.43    1.50 
 -12 -10  -2   19.76    1.77 
 -12 -10  -2   19.63    1.96 
 -12  10  -2   19.28    1.23 
  12  10   2   18.85    1.67 
 -14 -10  -2    6.45    1.81 
  14 -10   2    6.53    1.52 
  14 -10   2    5.06    1.02 
 -14 -10  -2    3.73    1.17 
  14  10   2    6.23    1.49 
 -13 -11   2    2.29    1.21 
  13 -11  -2    4.11    1.08 
  13 -11  -2    3.30    1.20 
 -13  11   2    3.35    1.29 
  13  11  -2    4.76    1.24 
 -11 -11   2    4.90    1.38 
  11 -11  -2    5.84    1.13 
 -11 -11   2    4.08    1.41 
 -11  11   2    4.74    1.21 
  11  11  -2    4.97    1.17 
 -11  11   2    5.06    0.80 
  -9 -11   2   -0.06    0.96 
   9 -11  -2    0.28    0.76 
  -9 -11   2    0.93    0.92 
  -9  11   2   -0.64    0.73 
   9  11  -2   -0.08    0.81 
  -9  11   2   -0.19    0.48 
  -7 -11   2    2.33    1.06 
  -7 -11   2    2.03    0.88 
   7 -11  -2    2.06    0.83 
  -7  11   2    2.31    0.69 
   7  11  -2    3.51    0.90 
  -7  11   2    2.96    0.97 
  -5 -11   2   20.04    2.00 
   5 -11  -2   21.33    1.70 
  -5 -11   2   19.69    1.65 
   5  11  -2   21.64    1.49 
  -5  11   2   17.75    1.45 
  -5  11   2   21.59    2.17 
   5  11  -2   19.79    1.40 
   5  11  -2   18.89    1.72 
  -5  11   2   16.55    1.46 
  -5  11   2   17.85    1.82 
  -3 -11   2    3.15    0.78 
  -3 -11   2    1.72    1.04 
   3 -11  -2    1.62    0.87 
  -3  11   2    2.11    0.87 
   3  11  -2    1.26    0.65 
   3  11  -2    2.32    0.68 
  -3  11   2    2.24    0.78 
   3  11  -2    2.61    0.86 
   3  11  -2    1.96    0.79 
   1 -11  -2   -0.29    0.71 
   1 -11  -2   -0.22    0.63 
  -1 -11   2   -0.02    0.65 
  -1 -11   2    1.31    0.86 
   1  11  -2    0.85    0.66 
  -1  11   2    0.08    0.63 
   1  11  -2    0.25    0.69 
  -1  11   2    0.15    0.75 
   1  11  -2   -0.49    0.63 
  -1 -11  -2   20.47    1.75 
   1 -11   2   22.48    1.96 
  -1 -11  -2   19.22    1.92 
  -1  11  -2   24.82    1.74 
  -1  11  -2   21.72    1.68 
   1  11   2   23.09    1.80 
   1  11   2   24.02    1.78 
  -3 -11  -2   -0.10    0.77 
  -3 -11  -2    0.22    0.66 
   3 -11   2    0.37    0.83 
  -3  11  -2    0.54    0.75 
   3  11   2   -0.27    0.65 
   3  11   2    1.25    0.79 
  -3  11  -2   -0.01    0.61 
   3  11   2    0.51    0.72 
  -5 -11  -2    5.18    1.21 
  -5 -11  -2    3.92    1.33 
   5 -11   2    4.32    1.05 
   5  11   2    2.18    0.90 
  -5  11  -2    4.73    1.14 
   5  11   2    4.36    1.07 
   5  11   2    4.81    1.04 
  -5  11  -2    4.88    1.00 
  -7 -11  -2    2.59    0.86 
  -7 -11  -2    0.81    1.17 
   7 -11   2    2.00    0.91 
  -7  11  -2    0.91    0.79 
   7  11   2    0.95    0.85 
  -7  11  -2    0.38    0.63 
  -9 -11  -2   -0.51    0.82 
   9 -11   2    0.86    0.99 
   9 -11   2    0.23    0.76 
  -9 -11  -2    0.74    1.23 
   9  11   2   -0.17    0.91 
  -9  11  -2    0.93    0.63 
  -9  11  -2    0.83    0.81 
  11 -11   2    0.91    1.19 
  11 -11   2    0.56    0.80 
 -11 -11  -2    1.71    1.45 
  11  11   2   -0.16    0.88 
 -11  11  -2    0.65    0.73 
  -8 -12   2    1.92    1.13 
   8 -12  -2    2.11    1.17 
  -8 -12   2    2.22    1.17 
  -8  12   2    1.15    1.03 
   8  12  -2    2.41    1.07 
  -6 -12   2    1.30    0.94 
   6 -12  -2   -0.17    0.76 
  -6 -12   2    0.64    1.00 
  -6  12   2    0.85    0.92 
  -4 -12   2    4.55    1.26 
   4 -12  -2    3.92    1.18 
  -4  12   2    1.30    1.01 
  -2 -12   2    0.69    1.14 
   2 -12  -2    0.55    0.95 
   2  12  -2    1.40    0.85 
  -2  12   2    1.99    1.15 
   2  12  -2    1.04    0.86 
  -2  12   2    0.70    0.95 
   0 -12   2    1.48    1.02 
   0 -12  -2    1.20    1.10 
   0  12  -2    2.64    0.92 
   0  12  -2    2.69    0.96 
   0  12   2    0.58    0.89 
   0  12   2    2.60    0.95 
   2 -12   2    3.68    1.28 
  -2 -12  -2    2.56    1.25 
   2  12   2    4.61    1.10 
  -2  12  -2    3.40    1.05 
   2  12   2    1.82    0.90 
  -4 -12  -2    0.57    0.81 
   4 -12   2    0.43    1.16 
  -4 -12  -2   -0.11    1.19 
   4  12   2    1.29    0.82 
  -4  12  -2    0.34    0.87 
   4  12   2    0.40    0.77 
  -6 -12  -2   -0.09    0.93 
  -6 -12  -2   -0.82    0.82 
   6 -12   2    0.35    0.88 
   6  12   2    0.53    0.85 
  -6  12  -2   -0.61    0.88 
  26   0  -3    0.00    0.93 
 -26   0   3    0.33    0.80 
 -26   0   3    0.10    0.77 
 -24   0   3    0.27    0.68 
 -24   0   3   -0.19    0.71 
  24   0  -3    0.34    0.90 
  24   0  -3    0.10    0.79 
 -24   0   3   -0.37    0.87 
 -24   0   3   -0.42    0.57 
 -24   0   3   -0.38    0.49 
 -22   0   3    0.03    0.60 
  22   0  -3   -0.30    0.61 
  22   0  -3   -0.20    0.61 
 -22   0   3   -0.54    0.48 
 -22   0   3   -0.09    0.81 
 -22   0   3    0.26    0.65 
 -22   0   3   -0.56    0.46 
  22   0  -3   -0.04    0.70 
 -20   0   3   -0.20    0.50 
  20   0  -3   -0.47    0.50 
 -20   0   3   -0.10    0.72 
 -20   0   3   -0.49    0.40 
  20   0  -3   -0.90    0.60 
 -20   0   3   -0.04    0.45 
 -20   0   3    0.17    0.52 
  20   0  -3   -0.30    0.38 
  20   0  -3   -0.41    0.54 
  18   0  -3   -0.55    0.54 
  18   0  -3   -0.05    0.48 
 -18   0   3    0.03    0.38 
 -18   0   3   -0.04    0.30 
  18   0  -3    0.20    0.46 
 -18   0   3   -0.40    0.47 
 -18   0   3    0.25    0.42 
  18   0  -3   -0.34    0.36 
  18   0  -3    0.58    0.48 
 -18   0   3    0.30    0.65 
  18   0  -3    0.32    0.37 
 -18   0   3    0.07    0.45 
 -18   0   3    0.14    0.25 
 -16   0   3   -0.12    0.32 
 -16   0   3   -0.01    0.40 
 -16   0   3    0.29    0.55 
  16   0  -3   -0.06    0.31 
 -16   0   3    0.10    0.23 
  16   0  -3   -0.12    0.45 
  16   0  -3   -0.14    0.42 
  16   0  -3   -0.10    0.41 
 -16   0   3    0.29    0.27 
 -16   0   3   -0.05    0.36 
  16   0  -3    0.10    0.39 
  16   0  -3    0.32    0.38 
  16   0  -3    0.08    0.31 
 -16   0   3   -0.16    0.32 
 -14   0   3   -0.19    0.44 
  14   0  -3   -0.04    0.44 
 -14   0   3    0.06    0.23 
  14   0  -3   -0.09    0.34 
 -14   0   3    0.17    0.21 
  14   0  -3   -0.15    0.37 
 -14   0   3    0.27    0.36 
  14   0  -3   -0.02    0.27 
  14   0  -3   -0.16    0.29 
 -14   0   3   -0.09    0.31 
 -14   0   3   -0.03    0.31 
 -14   0   3    0.18    0.31 
  14   0  -3   -0.53    0.39 
  14   0  -3   -0.40    0.31 
  14   0  -3   -0.18    0.34 
 -12   0   3    0.29    0.30 
  12   0  -3   -0.35    0.27 
 -12   0   3   -0.09    0.16 
 -12   0   3   -0.21    0.29 
  12   0  -3    0.05    0.37 
  12   0  -3   -0.25    0.25 
 -12   0   3    0.08    0.21 
 -12   0   3   -0.13    0.18 
  12   0  -3   -0.25    0.23 
  12   0  -3   -0.18    0.29 
 -12   0   3   -0.17    0.25 
 -12   0   3   -0.32    0.26 
  12   0  -3   -0.02    0.38 
  12   0  -3    0.34    0.28 
  12   0  -3    0.03    0.29 
 -12   0   3    0.34    0.40 
 -10   0   3   -0.36    0.17 
 -10   0   3   -0.33    0.22 
  10   0  -3    0.39    0.35 
 -10   0   3   -0.02    0.18 
 -10   0   3   -0.06    0.13 
 -10   0   3   -0.35    0.30 
  10   0  -3   -0.15    0.25 
 -10   0   3   -0.08    0.22 
  10   0  -3   -0.14    0.21 
  10   0  -3    0.26    0.21 
  10   0  -3    0.37    0.28 
  10   0  -3   -0.20    0.31 
 -10   0   3    0.19    0.21 
  10   0  -3    0.22    0.25 
 -10   0   3   -0.44    0.21 
 -10   0   3    0.00    0.27 
  10   0  -3   -0.55    0.22 
  10   0  -3   -0.04    0.25 
  -8   0   3    0.09    0.23 
  -8   0   3   -0.05    0.21 
   8   0  -3   -0.01    0.18 
  -8   0   3   -0.04    0.15 
  -8   0   3    0.01    0.18 
   8   0  -3   -0.16    0.21 
  -8   0   3    0.20    0.20 
  -8   0   3   -0.07    0.17 
   8   0  -3    0.16    0.21 
  -8   0   3    0.04    0.10 
   8   0  -3    0.11    0.19 
  -8   0   3    0.04    0.18 
   8   0  -3    0.06    0.22 
   8   0  -3   -0.15    0.18 
   8   0  -3    0.06    0.10 
  -8   0   3   -0.28    0.14 
  -8   0   3    0.12    0.29 
  -8   0   3    0.27    0.20 
   8   0  -3    0.02    0.09 
   8   0  -3   -0.29    0.16 
   8   0  -3   -0.25    0.25 
   8   0  -3   -0.15    0.16 
   8   0  -3   -0.04    0.18 
   6   0  -3    0.10    0.23 
   6   0  -3   -0.05    0.09 
   6   0  -3   -0.25    0.15 
  -6   0   3    0.02    0.14 
  -6   0   3    0.02    0.19 
  -6   0   3    0.08    0.17 
  -6   0   3   -0.02    0.17 
   6   0  -3   -0.05    0.16 
  -6   0   3    0.15    0.18 
   6   0  -3   -0.05    0.17 
  -6   0   3    0.25    0.27 
   6   0  -3   -0.23    0.24 
   6   0  -3   -0.06    0.18 
   6   0  -3   -0.08    0.19 
   6   0  -3   -0.10    0.17 
  -6   0   3   -0.07    0.17 
   6   0  -3    0.00    0.19 
  -6   0   3    0.14    0.14 
   4   0  -3    0.06    0.20 
   4   0  -3   -0.07    0.12 
   4   0  -3    0.14    0.08 
  -4   0   3    0.03    0.13 
   4   0  -3   -0.10    0.15 
   4   0  -3    0.03    0.05 
  -4   0   3   -0.02    0.14 
   4   0  -3   -0.39    0.13 
  -4   0   3   -0.03    0.14 
   4   0  -3    0.09    0.12 
  -4   0   3   -0.07    0.05 
   4   0  -3    0.01    0.14 
  -4   0   3    0.02    0.15 
  -4   0   3   -0.08    0.14 
   4   0  -3   -0.13    0.13 
  -4   0   3    0.00    0.10 
  -2   0   3    0.00    0.08 
  -2   0   3   -0.04    0.09 
  -2   0   3    0.10    0.09 
   2   0  -3    0.12    0.08 
  -2   0   3    0.05    0.07 
   2   0  -3    0.09    0.06 
   2   0  -3    0.19    0.09 
   2   0  -3    0.20    0.09 
   2   0  -3    0.05    0.09 
  -2   0   3    0.07    0.08 
  -2   0   3   -0.06    0.06 
   2   0  -3   -0.01    0.06 
   2   0  -3    0.01    0.08 
  -2   0   3   -0.09    0.06 
   0   0  -3   -0.04    0.08 
   0   0  -3   -0.04    0.08 
   0   0   3    0.12    0.10 
   0   0  -3    0.03    0.07 
   0   0  -3    0.05    0.08 
   0   0   3    0.10    0.07 
   0   0   3    0.10    0.08 
   0   0  -3    0.04    0.08 
   0   0  -3   -0.13    0.08 
   0   0   3   -0.02    0.08 
   0   0   3    0.04    0.08 
   0   0   3    0.08    0.07 
   0   0  -3    0.02    0.05 
  -2   0  -3   -0.09    0.11 
   2   0   3    0.00    0.11 
   2   0   3    0.13    0.11 
  -2   0  -3   -0.11    0.13 
  -2   0  -3    0.02    0.12 
  -2   0  -3   -0.10    0.12 
  -2   0  -3   -0.07    0.13 
  -2   0  -3    0.09    0.11 
   2   0   3    0.20    0.11 
   2   0   3   -0.12    0.08 
   2   0   3   -0.02    0.13 
  -2   0  -3    0.01    0.11 
   2   0   3    0.14    0.12 
   2   0   3   -0.11    0.11 
   2   0   3   -0.05    0.12 
   2   0   3   -0.05    0.15 
  -2   0  -3    0.26    0.17 
   4   0   3    0.02    0.18 
  -4   0  -3   -0.09    0.18 
   4   0   3   -0.01    0.17 
  -4   0  -3    0.05    0.18 
   4   0   3    0.21    0.15 
   4   0   3   -0.35    0.12 
  -4   0  -3    0.10    0.23 
   4   0   3   -0.20    0.15 
  -4   0  -3    0.15    0.17 
   4   0   3    0.09    0.20 
  -4   0  -3    0.07    0.17 
   4   0   3   -0.01    0.15 
  -4   0  -3    0.01    0.15 
  -4   0  -3    0.20    0.14 
   4   0   3   -0.16    0.20 
  -4   0  -3   -0.05    0.14 
  -4   0  -3    0.46    0.24 
   4   0   3   -0.15    0.16 
  -4   0  -3   -0.04    0.13 
   6   0   3   -0.02    0.18 
  -6   0  -3   -0.27    0.15 
  -6   0  -3   -0.45    0.18 
  -6   0  -3    0.04    0.16 
  -6   0  -3    0.04    0.19 
  -6   0  -3    0.10    0.15 
   6   0   3   -0.08    0.14 
   6   0   3    0.10    0.21 
   6   0   3   -0.16    0.16 
  -6   0  -3    0.15    0.18 
   6   0   3    0.25    0.24 
  -6   0  -3    0.04    0.14 
   6   0   3    0.28    0.20 
  -6   0  -3   -0.40    0.23 
   6   0   3    0.16    0.16 
  -6   0  -3    0.21    0.18 
  -6   0  -3   -0.03    0.15 
   6   0   3   -0.17    0.16 
   6   0   3    0.15    0.19 
  -8   0  -3    0.29    0.16 
   8   0   3   -0.25    0.20 
   8   0   3   -0.14    0.23 
   8   0   3   -0.12    0.19 
  -8   0  -3    0.21    0.36 
  -8   0  -3   -0.54    0.24 
  -8   0  -3    0.16    0.21 
   8   0   3   -0.27    0.26 
   8   0   3   -0.06    0.17 
  -8   0  -3    0.05    0.20 
  -8   0  -3   -0.24    0.10 
  -8   0  -3    0.02    0.20 
   8   0   3    0.14    0.27 
   8   0   3    0.03    0.21 
   8   0   3    0.49    0.21 
  -8   0  -3    0.04    0.22 
   8   0   3   -0.10    0.24 
  -8   0  -3   -0.03    0.19 
  -8   0  -3   -0.14    0.26 
  -8   0  -3   -0.04    0.16 
   8   0   3   -0.10    0.22 
 -10   0  -3   -0.09    0.28 
  10   0   3    0.27    0.27 
 -10   0  -3   -0.22    0.18 
 -10   0  -3    0.29    0.39 
 -10   0  -3   -0.22    0.21 
  10   0   3   -0.33    0.24 
  10   0   3   -0.12    0.26 
  10   0   3   -0.02    0.19 
  10   0   3    0.04    0.27 
  10   0   3    0.03    0.23 
  10   0   3   -0.09    0.28 
 -10   0  -3    0.10    0.24
[truncated: 2,015,227 more chars]
